# Supplementary material
Source: PubMed Central journal article supplement (PMC7388731)
Supplement: NIHMS1530534-supplement-1.pdf [file NIHMS1530534-supplement-1.pdf]

## Supplementary Methods

### *Immunohistochemistry Staining*

Immunohistochemistry (IHC) staining was performed on human colorectal biopsies. After overnight incubation with anti-Ki67 antibody (Proteintech, Rosemont, IL), anti-p21 antibody (Proteintech, Rosemont, IL), anti-p27 antibody (Proteintech, Rosemont, IL), anti-RB1 antibody (Proteintech, Rosemont, IL), anti-PRMT6 antibody (Cell Signaling Technology, Danvers, MA), anti-DNMT1 antibody (Abcam, Cambridge, MA) or anti-PPAR- $\alpha$  antibody (Abcam, Cambridge, MA), the slides were incubated for 1 hour with horseradish peroxidase-conjugated secondary antibodies (DAKO, Santa Clara, CA). The intensity of indicated proteins were detected using the DAB kit (BioGenex, San Ramon, CA).

### *Quantitative Real-time PCR*

Total RNA was extracted using Trizol (Invitrogen, Carlsbad, CA). cDNA was synthesized from 1  $\mu$ g total RNA using qScript cDNA SuperMix (Gaithersburg, MD). Real-time PCR primer sequences are included in the Supplementary Table 6. The relative amount of each mRNA was calculated after normalizing to their corresponding *Actb* or *Gapdh* mRNA, and the results expressed as fold change relative to the control group.

### *Macroscopic and Histopathologic Analysis*

Colons were excised from the ileocecal junction to the anal verge and flushed with PBS. Colon length was measured from the colocecal junction to the rectum. The colons were opened longitudinally, tumors were counted and tumor diameter measured under a stereo microscope (ZEISS Stemi 2000-C, Germany) equipped with a Jenoptik camera and television monitor and interfaced to ProgRes analysis software. For histologic analysis, the colon tissues were fixed in 10% formalin for 24 hours, followed by paraffin embedding, and processed for standard H&E staining. H&E-stained slides were evaluated independently by two pathologists to calculate the prevalence of low-grade adenomas, high grade adenomas and adenocarcinomas.

### *BrdU Staining*

To assess cell proliferation in the colon, mice were intraperitoneally injected with 20 mg/kg.bw bromodeoxyuridine (BrdU) (Sigma, St. Louis, MO). Two hours later, the mice were killed, and the colon dissected and fixed in 10% PBS-buffered formalin before embedding in paraffin. BrdU immunostaining was carried out using a BrdU Detection Kit (BD Biosciences, San Diego, CA). The BrdU labeling index was determined by calculating the percentage of BrdU-positive nuclei in 9 random 40 $\times$  microscopic fields per mouse.

### *TUNEL Staining*

Apoptosis was detected by TUNEL staining by the DeadEnd<sup>TM</sup> Colorimetric TUNEL kit obtained from Promega (Madison, WI) following the manufacture's instruction.

### *Western Blotting*

Colons or cultured cells were lysed with RIPA lysis buffer with protease inhibitors. Protein concentrations were determined by the BCA protein assay kit (Pierce Chemical, Rockford, IL). The samples were subjected to SDS-polyacrylamide gel electrophoresis, transferred to polyvinylfluoride membranes, and incubated overnight at 4 $^{\circ}$ C with antibodies against PPAR $\alpha$

(Abcam, Cambridge, MA), ACOX1 (Proteintech, Rosemont, IL), DNMT1 (Abcam, Cambridge, MA), PRMT6 (Cell Signaling Technology, Danvers, MA), p21 (Proteintech, Rosemont, IL), p27 (Proteintech, Rosemont, IL), H3R2me2a (Abcam, Cambridge, MA), Histone H3 (Abcam, Cambridge, MA), RB1 (Cell Signaling Technology, Danvers, MA), phospho-RB1 (S807/811) (Cell Signaling Technology, Danvers, MA), and ACTB (Cell Signaling Technology, Danvers, MA). Proteins were visualized using the femto signal chemiluminescent substrate (Pierce) under the image analyzer (Alpha Innotech Corp., San Leandro, CA).

#### *Luciferase Reporter Assays*

Peroxisome proliferator responsive elements (PPREs) in the promoter region of *Rb1* were predicted by Genomatix software. The *Rb1* promoter fragments containing different PPREs were synthesized by IDT DNA Technologies (Coralville, IA). The fragments were cloned into the pGL4.10 luciferase vector (Promega, Madison, WI). *Rb1* reporter vectors and phRL-TK Renilla luciferase control vector (Promega, Madison, WI) were co-transfected into HCT116 cells (ATCC CCL-247) by use of Lipofectamine 3000 transfection reagent (Thermo Fisher Scientific, Waltham, MA). In addition, either PPAR $\alpha$  expression vector<sup>1</sup> or the empty backbone vector (pSG5) were co-transfected into the cells and a final concentration of 100  $\mu$ M Wy-14643 or together with 5  $\mu$ M GW-6471 was added to the culture medium to activate or inhibit PPAR $\alpha$  activity, respectively. Empty vector (pGL4.10) was used as a negative control and a validated PPRE reporter vector from Addgene<sup>2</sup> served as a positive control. 24 hours after the transfection, luciferase assays were performed by use of the dual-luciferase assay system (Promega, Madison, WI). Firefly and Renilla luciferase activities were measured by Veritas microplate luminometer (Turner Biosystems, Sunnyvale, CA).

#### *Production of Recombinant Adenovirus Overexpressing Mouse PPAR $\alpha$*

The coding region of mouse PPAR $\alpha$  was obtained by PCR with the forward primer (5'-CACCATGGTGGACACAGAGAGCCCCATC-3') and reverse primer (5'-TTAGTACATGTCTCTGTAGATCTC-3'), using pUC57-TAP-Ppar $\alpha$  (Genescript, Piscataway, NJ) as template. The PCR product was inserted into pENTR/D-TOPO<sup>®</sup> to generate pENTR-PPAR $\alpha$ . The adenovirus vector producing process was carried out as previously described<sup>3</sup> and in accordance with the protocols of ViraPower<sup>™</sup> Adenoviral Expression System (Thermo Fisher Scientific, Waltham, MA), pENTR Directional TOPO Cloning Kits (Thermo Fisher Scientific, Waltham, MA) and GATEWAY LR clonase II<sup>™</sup> EnzymeMIX (Thermo Fisher Scientific, Waltham, MA). The titer of recombinant adenoviruses was determined using Adeno-X<sup>™</sup> Rapid Titer Kit (Clontech, Mountain View, CA).

#### *Cell Culture and Treatment*

HCT116 cells were maintained in McCoy's 5A modified medium supplemented with 10% FBS and 1% antibiotic and seeded in 12-well plates (for gene expression analysis) or 6-well plates (for protein expression analysis). Cells were treated with 5  $\mu$ M 5-Aza for 72 h, or 20  $\mu$ M EPZ020411 for 48h, or transfected with plasmid overexpressing DNMT1 (Addgene)<sup>4</sup> or PRMT6 (Origene, RC229177) for 48h. For ChIP assays, HCT116 cells were transfected with pSG5-PPAR $\alpha$  expression vector and 48h later, the cells were exposed to a final concentration of 100  $\mu$ M Wy-14643 or together with 5  $\mu$ M GW-6471 for an additional 24h. MC38 cells were maintained in Dulbecco's modified Eagle's medium (DMEM) supplemented with 10% FBS and 1% antibiotic. For ChIP assay, MC38 cells were infected with adenovirus overexpressing

PPAR $\alpha$  (MOI 20) and 48h later, the cells were exposed to a final concentration of 100  $\mu$ M Wy-14643 or together with 5  $\mu$ M GW-6471 for an additional 24h. Primary intestinal epithelial cells were isolated using a protocol adapted from a published method.<sup>5</sup> Briefly, intestinal and colonic tissues were removed from new-born mice (postnatal 5-7 days) and opened longitudinally and washed with ice-cold HBSS. Placed the intestine in Dissociation reagent #1 (30 mM EDTA and 1.5 mM DTT in PBS, add 10  $\mu$ M Y27632 just prior to use) and incubated on ice for 20 min, then changed to dissociation reagent #2 (30 mM EDTA in PBS, add 10  $\mu$ M Y27632 just prior to use) and incubated at 37°C for 10 min. The tube was agitated for 30s to release epithelial cells from basement membrane and remnants of intestinal tissue removed. The cell solution was centrifuged at 1000  $\times$  g for 5 min at 4°C and washed once with 10% FBS/PBS. The supernatant was removed and the pellet resuspended in 10 ml of a digestion buffer containing 8 mg dispase (Gibco). The cell solution was incubated at 37°C for 10 min and shaken every 2 min. 10% FBS and 50  $\mu$ l 10 mg/ml DNase were added to the cell solution and the resulting digestion mixture was passed over a 70  $\mu$ m filter. The cell solution was centrifuged at 1000  $\times$  g for 5 min at 4°C and the pellet washed once with 10% FBS/PBS. The supernatant was removed and the pellet resuspended in complete growth media (DMEM/F12 containing 50 ng/ml EGF, 500 ng/ml R-spondin 1, 100 ng/ml Noggin, 0.25 U/ml insulin, 5  $\mu$ g/ml transferrin, 10% FBS and 1% antibiotic, with 10  $\mu$ M Y27632 added just prior to use). The cells were seeded in type I collagen-coated culture dishes and the medium was changed every 3 days. Primary intestinal epithelial cells were treated with 500 nM PD0332991 for 48 h, or infected with control adenovirus (Ad-GFP) or adenovirus overexpressing PPAR $\alpha$  (MOI 100) for 60 h.

#### *Knockdown of RB1, DNMT1 and PRMT6*

HCT116 cells were transfected with siRNA targeting *Rb1* (5'-GGAUAGCAAAACAACUAGAtt-3'), or with siRNA targeting *Dnmt1* (5'-GCACCUCAUUUGCCGAAUAtt-3'), or with siRNA targeting *Prmt6* (5'-GAAAUAGUAUGGAUUUUUAtt-3'), or with a control siRNA (5'-UUGUUCGAACGUGUCACGUtt-3') using RNAiMAX (Invitrogen, Carlsbad, CA) according to the manufacture's instruction. siRNAs were purchased from Thermo Fisher Scientific (Waltham, MA). Cells were collected at 48h after transfection for RNA analysis and at 72 h after transfection for protein analysis.

#### *MeDIP*

Methyl-DNA immunoprecipitation (MeDIP) was performed using a protocol adapted from a published method.<sup>6</sup> Genomic DNA of HCT116 cells or mouse colon tissues was isolated using QIAamp<sup>®</sup> mini DNA kit (QIAGEN, Germantown, MD) following the manufacture's instruction and was sheared by sonication to between 200 and 500 bp. The sonicated DNA was denatured at 95°C for 10 min. Denatured DNA (2  $\mu$ g) was saved for the total input control. For each IP, 2  $\mu$ g of denatured DNA was diluted in 500  $\mu$ l IP buffer (0.05% Triton X-100 and 140 mM NaCl) with 3  $\mu$ g anti-m<sup>5</sup>C monoclonal antibody (Abcam, Cambridge, MA) or normal mouse IgG (Cell Signaling Technology, Danvers, MA) and incubated overnight at 4°C. To collect the immune complex, 50  $\mu$ l of protein G Dynal beads (Invitrogen, Carlsbad, CA) were added to each IP reaction mixture and incubate at room temperature for additional 2 h. Beads were immobilized using the magnetic rack and washed three times with IP buffer. The immune complexes were eluted by incubation in 500  $\mu$ l proteinase K digestion buffer containing 5  $\mu$ l/ml proteinase K solution (stock concentration, 20 mg/ml) at 50°C for 2 h. DNA was purified using MinElute<sup>®</sup>

Reaction Cleanup Kit (QIAGEN, Germantown, MD) and subjected to real-time qPCR using IP primers listed in Supplementary Table 6. Relative quantification of PCR products was based on the value differences between the bound and input using the  $\Delta\Delta C_t$  method.

#### *ChIP Assays*

ChIP for H3R2me2a or PPAR $\alpha$  was performed in accordance with the manufacture's protocol of ChIP-IT High Sensitivity<sup>®</sup> Kit (Active Motif, Carlsbad, CA). Chromatins were prepared from isolated nuclei of formaldehyde cross-linked HCT116 cells or MC38 cells or mouse colon tissues and sheared to between 200 and 500 bp. Sheared chromatins were immunoprecipitated with anti-H3R2me2a Ab (Abcam, Cambridge, MA), or anti-PPAR $\alpha$  Ab (Abcam, Cambridge, MA), or anti-pan-H3 antibody (Cell Signaling Technology, Danvers, MA), or normal rabbit IgG (Cell Signaling Technology, Danvers, MA). The precipitated DNA samples were incubated with RNase A and proteinase K, purified using MinElute<sup>®</sup> Reaction Cleanup Kit (QIAGEN, Germantown, MD), and subjected to real-time PCR using IP primers listed in Supplementary Table 6.

#### *Metabolomics*

Deproteinized urine samples and tissue extracts were analyzed by ultra-high performance liquid chromatography/Xevo G2 quadrupole-time-of-flight mass spectrometry (UPLC/QTOFMS) with an electrospray ionization source equipped with Acquity UPLC BEH C18 or amide column (Waters Corp., Milford, MA) for reverse-phase (RP) or hydrophilic interaction liquid chromatography (HILIC) analysis, respectively, as previously described.<sup>7</sup> The multivariate data matrix was analyzed by SIMCA-P+15 software (Umetrics, Kinnelon, NJ). Data quality inspection as well as distribution and unsupervised segregation of different groups on global metabolomic space were checked by principal components analysis (PCA) of the Pareto-scaled data. The supervised orthogonal projection to latent structures (OPLS) model was used to identify ions contributing to discrimination of metabolic traits. Candidate ions were identified on the basis of accurate mass measurement using metabolomic databases such as METLIN (<http://metlin.scripps.edu/>) or HMDB (<http://www.hmdb.ca/>) and MS/MS fragmentation pattern. Finally, the identity was confirmed by comparison of retention time and fragmentation pattern with authentic standards.

#### *Targeted Urinary Metabolite Quantitation*

Metabolites in the deproteinized urine samples were quantified in multiple reactions monitoring mode on a XEVO triple quadrupole mass spectrometer (Waters Corp., Milford, MA).  $\alpha$ -Aminopimelic acid (5  $\mu$ M) was used as internal standard. The following metabolites were quantified by monitoring characteristic fragmentation reactions (in bracket);  $\alpha$ -aminopimelic acid (176.244 $\rightarrow$ 112.152, ESI+), creatinine (113.963 $\rightarrow$ 86.006, ESI+), betaine (117.983 $\rightarrow$ 42.127, ESI+), carnitine (162.201 $\rightarrow$ 102.777, ESI+), 1-methylnicotinamide (137.032 $\rightarrow$ 94.478, ESI+), S-adenosylmethionine (399.24 $\rightarrow$ 250.038, ESI+), and 5-methylcytosine (126.091 $\rightarrow$ 108.566, ESI+). Asymmetric dimethylarginine (ADMA) (259.238 $\rightarrow$ 214.134, ESI+) and symmetric dimethylarginine (SDMA) (259.238 $\rightarrow$ 228.166, ESI+) were quantified using a derivatizing method described in detail in a publish paper.<sup>8</sup> All data were processed using TargetLynx software (Waters Corp., Milford, MA). Internal standard-normalized area under the peak (response) from serially diluted authentic standard solution was used to build calibration curve

for each metabolite. The metabolite concentrations were determined from the calibration curve and normalized by creatinine.

#### *Exome sequencing and data analysis*

Genomic DNA was isolated using QIAamp<sup>®</sup> mini DNA kit (QIAGEN, Germantown, MD) and subjected to exome-sequencing on HiSeq4000 using the Agilent SureSelect XT Mouse All Exon kit and paired-end sequencing. Reads were trimmed for adapters and low-quality bases using Trimmomatic software before alignment to the mouse mm10 reference genome using BWA mapping software.<sup>9</sup> Mapped reads were then de-duplicated using Picard Tools (<http://broadinstitute.github.io/picard>), re-aligned, and base quality score recalibration was performed using the Genome Analysis Toolkit (GATK).<sup>10</sup> Variant calling was performed using Mutect2 in tumor-normal mode and joint genotyping was performed on all samples together, following the best practices guidelines for exome-seq analysis provided by the GATK authors.<sup>11</sup> Variants were hard filtered for quality, annotated with functional and consequence prediction using Ensembl's Variant Effect Predictor (VEP)<sup>12</sup> and converted to Mutation Annotation Format (MAF). The combined MAF files were further analyzed and visualized using the 'maftools' package (version 1.8.10)<sup>13</sup> and custom scripts in R version 3.5.1.<sup>14</sup> Frequently mutated genes in exome data identified by Shyr et al.<sup>15</sup> were converted to mouse IDs using the Homologene database<sup>16</sup> and removed from the data. Variants not predicted as "high" or "moderate" impact by VEP were also removed. Gene mutation data were then summarized separately for the KO and WT mice. Genes common between and unique to KO and WT samples were then separately tested for enrichment among Disease Ontology (DO) data available from the Mouse Genome Informatics database.<sup>17</sup> A Fisher's Exact Test was performed for each DO term, and the p-value adjusted using the Benjamini-Hochberg correction.

## Supplementary Discussion

To determine whether intestinal PPAR $\alpha$  depletion affects genetic mutations under carcinogen administration, genomic DNA of the colon tumors derived from AOM and DSS-administered *Ppara*<sup>fl/fl</sup> and similarly administered *Ppara* <sup>$\Delta$ IE</sup> mice (n=5/group, one sample from one individual mouse) were subjected to exome-sequencing together with the genomic DNA of the normal colon from vehicle-administered *Ppara*<sup>fl/fl</sup> and *Ppara* <sup>$\Delta$ IE</sup> mice (n=1/group, one sample is a pooled sample from 5 mice) that served as genetic background. By analyzing the data, 2214 genes were found mutated in at least one of the tumors derived from AOM and DSS-administered *Ppara*<sup>fl/fl</sup> mice and 3050 genes were found mutated in at least one of the tumors derived from AOM and DSS-administered *Ppara* <sup>$\Delta$ IE</sup> mice. Among those genes, 544 genes were commonly mutated in both tumors from AOM and DSS-administered *Ppara*<sup>fl/fl</sup> and *Ppara* <sup>$\Delta$ IE</sup> mice (Supplementary Figure 13). Next, disease ontology analysis was performed for 5 groups of genes: 2214 genes mutated in *Ppara*<sup>fl/fl</sup> mice, 3050 genes mutated in *Ppara* <sup>$\Delta$ IE</sup> mice, 544 genes mutated in both *Ppara*<sup>fl/fl</sup> and *Ppara* <sup>$\Delta$ IE</sup> mice, 1670 genes mutated only in *Ppara*<sup>fl/fl</sup> mice, 2506 genes mutated only in *Ppara* <sup>$\Delta$ IE</sup> mice. The complete somatic mutation gene list and disease ontology list can be found in Supplementary Table 7 and 8.

## References

1. Sher T, Yi HF, McBride OW, et al. cDNA cloning, chromosomal mapping, and functional characterization of the human peroxisome proliferator activated receptor. *Biochemistry* 1993;32:5598-604.
2. Kim JB, Wright HM, Wright M, et al. ADD1/SREBP1 activates PPAR $\gamma$  through the production of endogenous ligand. *Proc Natl Acad Sci U S A* 1998;95:4333-7.
3. Takahashi S, Tanaka N, Golla S, et al. Editor's Highlight: Farnesoid X Receptor Protects Against Low-Dose Carbon Tetrachloride-Induced Liver Injury Through the Taurocholate-JNK Pathway. *Toxicol Sci* 2017;158:334-346.
4. Li H, Rauch T, Chen ZX, et al. The histone methyltransferase SETDB1 and the DNA methyltransferase DNMT3A interact directly and localize to promoters silenced in cancer cells. *J Biol Chem* 2006;281:19489-500.
5. Gracz AD, Puthoff BJ, Magness ST. Identification, isolation, and culture of intestinal epithelial stem cells from murine intestine. *Methods Mol Biol* 2012;879:89-107.
6. Lizardi PM, Yan Q, Wajapeyee N. Methyl-Cytosine-Based Immunoprecipitation for DNA Methylation Analysis. *Cold Spring Harb Protoc* 2017;2017:pdb prot094854.
7. Manna SK, Tanaka N, Krausz KW, et al. Biomarkers of coordinate metabolic reprogramming in colorectal tumors in mice and humans. *Gastroenterology* 2014;146:1313-24.
8. Davids M, Swieringa E, Palm F, et al. Simultaneous determination of asymmetric and symmetric dimethylarginine, L-monomethylarginine, L-arginine, and L-homoarginine in biological samples using stable isotope dilution liquid chromatography tandem mass spectrometry. *J Chromatogr B Analyt Technol Biomed Life Sci* 2012;900:38-47.
9. Li H, Durbin R. Fast and accurate short read alignment with Burrows-Wheeler transform. *Bioinformatics* 2009;25:1754-60.

10. McKenna A, Hanna M, Banks E, et al. The Genome Analysis Toolkit: a MapReduce framework for analyzing next-generation DNA sequencing data. *Genome Res* 2010;20:1297-303.
11. Van der Auwera GA, Carneiro MO, Hartl C, et al. From FastQ data to high confidence variant calls: the Genome Analysis Toolkit best practices pipeline. *Curr Protoc Bioinformatics* 2013;43:11 10 1-33.
12. McLaren W, Gil L, Hunt SE, et al. The Ensembl Variant Effect Predictor. *Genome Biol* 2016;17:122.
13. Mayakonda A, Lin DC, Assenov Y, et al. Maftools: efficient and comprehensive analysis of somatic variants in cancer. *Genome Res* 2018;28:1747-1756.
14. R Core Team. *R: A Language and Environment for Statistical Computing*. Vienna, Austria: R Foundation for Statistical Computing, 2018.
15. **Shyr C, Tarailo-Graovac M**, Gottlieb M, et al. FLAGS, frequently mutated genes in public exomes. *BMC Med Genomics* 2014;7:64.
16. Sayers EW, Agarwala R, Bolton EE, et al. Database resources of the National Center for Biotechnology Information. *Nucleic Acids Res* 2019;47:D23-D28.
17. Smith CL, Blake JA, Kadin JA, et al. Mouse Genome Database (MGD)-2018: knowledgebase for the laboratory mouse. *Nucleic Acids Res* 2018;46:D836-D842.

**Author names in bold designate shared co-first authorship.**

## Supplementary Tables

**Table S1.** Data from AOM-induced colon cancer mouse model

**Table S2.** Data from AOM and DSS-induced colon cancer mouse model

**Table S3.** Methylation related metabolites identified from urine metabolome

**Table S4.** Data from AOM and DSS-induced colon cancer model of human *PPARA* transgenic mice

**Table S5.** Gender and age of colon cancer patients

**Table S6.** Sequences of primers used in qPCR analysis

**Table S7.** Somatic mutations of tumors derived from AOM and DSS-induced colon cancer mouse model (Included in a separate Excel file)

**Table S8.** Disease ontology analysis (Included in a separate Excel file)



**Supplementary Table 1. Data from AOM-induced colon cancer mouse model**

|                         | <i>Ppara</i> <sup>f/f</sup> AOM | <i>Ppara</i> <sup><math>\Delta</math>E</sup> AOM | <i>Ppara</i> <sup>f/f</sup> ctrl | <i>Ppara</i> <sup><math>\Delta</math>E</sup> ctrl |
|-------------------------|---------------------------------|--------------------------------------------------|----------------------------------|---------------------------------------------------|
| Total incidence         | 36.8% (7/19)                    | 57.9% (11/19)                                    | 0% (0/12)                        | 0% (0/8)                                          |
| Total multiplicity      | 0.58                            | 1.47                                             | 0                                | 0                                                 |
| > 3mm incidence         | 15.8% (3/19)                    | 52.6% (10/19)                                    | 0% (0/12)                        | 0% (0/8)                                          |
| > 3mm multiplicity      | 0.21                            | 0.84                                             | 0                                | 0                                                 |
| $\leq$ 3mm incidence    | 31.6% (6/19)                    | 42.1% (8/19)                                     | 0% (0/12)                        | 0% (0/8)                                          |
| $\leq$ 3mm multiplicity | 0.37                            | 0.63                                             | 0                                | 0                                                 |
| Low grade               | 57.1% (4/7)                     | 45.4% (5/11)                                     | 0%                               | 0%                                                |
| High grade              | 28.6% (2/7)                     | 27.3% (3/11)                                     | 0%                               | 0%                                                |
| Adenocarcinoma          | 14.3% (1/7)                     | 27.3% (3/11)                                     | 0%                               | 0%                                                |

**Supplementary Table 2. Data from AOM and DSS-induced colon cancer mouse model**

|                 | <i>Ppara</i> <sup>f1/f1</sup><br>AOM/DSS | <i>Ppara</i> <sup>ΔIE</sup><br>AOM/DSS | <i>Ppara</i> <sup>f1/f1</sup><br>ctrl | <i>Ppara</i> <sup>ΔIE</sup><br>ctrl |
|-----------------|------------------------------------------|----------------------------------------|---------------------------------------|-------------------------------------|
| Total incidence | 100% (11/11)                             | 100% (12/12)                           | 0% (0/7)                              | 0% (0/6)                            |
| Prolapse        | 0% (0/11)                                | 33.3% (4/12)                           | 0% (0/7)                              | 0% (0/6)                            |
| Multiplicity    | 8.73                                     | 18                                     | 0                                     | 0                                   |
| Low grade       | 9.1% (1/11)                              | 0% (0/12)                              | 0%                                    | 0%                                  |
| High grade      | 45.5% (5/11)                             | 41.7% (5/12)                           | 0%                                    | 0%                                  |
| Adenocarcinoma  | 45.4% (5/11)                             | 58.3% (7/12)                           | 0%                                    | 0%                                  |

**Supplementary Table 3. Methylation related metabolites identified from urine metabolome**

| Rt (min) | Measured <i>m/z</i> | Ion form           | Mass error ( <i>ppm</i> ) | Elemental composition | Putative metabolite | VIP      |
|----------|---------------------|--------------------|---------------------------|-----------------------|---------------------|----------|
| 1.38     | 126.067             | [M+H] <sup>+</sup> | 2.379693                  | C5H7N3O               | Methylcytosine      | 1.71726  |
| 5.28     | 203.151             | [M+H] <sup>+</sup> | 0.98449                   | C8H18N4O2             | Dimethylarginine    | 5.28682  |
| 2.57     | 137.071             | [M+H] <sup>+</sup> | -3.64773                  | C7H8N2O               | Methylnicotinamide  | 1.81217  |
| 3.76     | 162.113             | [M+H] <sup>+</sup> | 0                         | C7H15NO3              | Carnitine           | 3.97987  |
| 2.33     | 118.087             | [M+H] <sup>+</sup> | 1.693669                  | C5H11NO2              | Betaine             | 6.54432  |
| 5.33     | 399.151             | [M+H] <sup>+</sup> | 14.78159                  | C15H22N6O5S           | SAM                 | 0.367886 |

**Supplementary Table 4. Data from AOM and DSS-induced colon cancer model of human *PPARA* transgenic mice**

|                 | Chow         | Fenofibrate  |
|-----------------|--------------|--------------|
| Total incidence | 100% (15/15) | 100% (15/15) |
| Prolapse        | 40% (6/15)   | 0% (0/15)    |
| Multiplicity    | 10.13        | 4.07         |
| Low grade       | 0% (0/15)    | 20% (3/15)   |
| High grade      | 40% (6/15)   | 53.3% (8/15) |
| Adenocarcinoma  | 60% (9/15)   | 26.7% (4/15) |

**Supplementary Table 5. Gender and age of colon cancer patients**

|         |      | Low grade adenoma | High grade adenoma | Adenomcarcinoma in adenoma | Adenocarcinoma | Hyperplastic polyp |
|---------|------|-------------------|--------------------|----------------------------|----------------|--------------------|
| Gender  | M    | 63.2% (12/19)     | 70.6% (12/17)      | 80% (8/10)                 | 62.5% (10/16)  | 80% (4/5)          |
|         | F    | 36.8% (7/19)      | 29.4% (5/17)       | 20% (2/10)                 | 37.5% (6/16)   | 20% (1/5)          |
| Age (y) | M    | 56.9              | 64.2               | 65.6                       | 69.3           | 61.8               |
|         | F    | 63.4              | 66.4               | 67                         | 68             | 64                 |
|         | mean | 59.3              | 64.8               | 65.9                       | 68.8           | 62.2               |

**Supplementary Table 6. Sequences of primers used in qPCR analysis**

| <b>Mouse primers</b> | <b>Forward sequence</b>  | <b>Reverse sequence</b>  |
|----------------------|--------------------------|--------------------------|
| <i>Ppara</i>         | CCCTGAACATCGAGTGTCTGAA   | TTCGCCGAAAGAAGCCCTTA     |
| <i>Acox1</i>         | GGGCACGGCTATTCTCACAG     | CATCAAGAACCTGGCCGTCT     |
| <i>Acot1</i>         | CGATGACCTCCCCAAGAACAT    | CTTTACCTCGGGGTGGCT       |
| <i>Dnmt1</i>         | TGTTCTGTCGTCTGCAACCT     | GCCATCTCTTTCCAAGTCTT     |
| <i>Dnmt3a</i>        | CCATGCCAAGACTCACCTTC     | GCTTTCTTCTCAGCCTCCCT     |
| <i>Dnmt2</i>         | CACGCGCTGCGAAAAAGTC      | CCCTGTAGGCCAATCCTTGTG    |
| <i>Nsun2</i>         | ACACTGAGAACTCACTGGGTACA  | CCAGCTTAGTGGTTGTGGAACT   |
| <i>Nsun4</i>         | TGGGATAGTGTGAGTGTAAAGC   | AAGCATCGAAGATTTGGGCTG    |
| <i>Mettl1</i>        | CAGACCACACACTGCGCTA      | CATCCTTTGGATCATCATGGCTC  |
| <i>Mettl3</i>        | CTGGGCACTTGGATTAAAGGAA   | TGAGAGGTGGTGTAGCAACTT    |
| <i>Prmt1</i>         | GACTCGGGTGAAGATGGC       | GAAACTTCTTCAAGAGGGCGG    |
| <i>Prmt3</i>         | CCCTGAGAACCACAAAGACG     | GCCAGTAGAGAACACGACCC     |
| <i>Prmt5</i>         | ACATGGATGTGGTGCCATAA     | TGATTAGACGGGAGGTCAGC     |
| <i>Prmt6</i>         | ACCGCTCCAGACTTCATTTG     | ACCCTGTGGCATAACATTGCT    |
| <i>Prmt7</i>         | GCACTCCACTGAGGTGACAG     | CCCAATCAGCTCTGTGTCAA     |
| <i>Prmt8</i>         | CCCTGAGAACCACAAAGACG     | GCCAGTAGAGAACACGACCC     |
| <i>Rb1</i>           | TGCATCTTTATCGCAGCAGTT    | GTTACACAGTCCGTTCTAATTTG  |
| <i>c-Myc</i>         | TGAAGTTCACGTTGAGGGG      | AGAGCTCCTCGAGCTGTTT      |
| <i>p53</i>           | GCGTAAACGCTTCGAGATGTT    | TTTTATGGCGGGAAGTAGACTG   |
| <i>Pten</i>          | TGGATTCTGACTTAGACTTGACCT | GCGGTGTATAATGTCTCTCAG    |
| <i>p21</i>           | CCTGGTGATGTCCGACCTG      | CCATGAGCGCATCGCAATC      |
| <i>p27</i>           | GACGTAACAGCTCCGAATTAAG   | GGCAGATGGTTTAAAGAGTGCC   |
| <i>Bcl2</i>          | GTCGCTACCGTCGTGACTTC     | CAGACATGCACCTACCCAGC     |
| <i>Apc</i>           | CTTGTTGGCCAGTTAAAACTGA   | CGCTTTTGAGGGTTGATTCTT    |
| <i>β-catenin</i>     | ATGGAGCCGGACAGAAAAGC     | CTTGCCACTCAGGGAAGGA      |
| <i>β-actin</i>       | GGCTGTATTCCCCTCCATCG     | CCAGTTGGTAACAATGCCATGT   |
| <i>Gapdh</i>         | AGGTCGGTGTGAACGGATTTG    | TGTAGACCATGTAGTTGAGGTCA  |
| <b>Human primers</b> |                          |                          |
| <i>Ppara</i>         | TCATCACGGACACGCTTTCA     | TCAATGCTCCACTGGGAGAC     |
| <i>Dnmt1</i>         | CCTAGCCCCAGGATTACAAGG    | ACTCATCCGATTTGGCTCTTTC   |
| <i>Prmt6</i>         | GGAGTCGGAGAAACCCCTG      | TGAAACGTCCGTGTCTTGTCTC   |
| <i>p21</i>           | CGATGGAACCTCGACTTTGTCA   | GCACAAGGGTACAAGACAGTG    |
| <i>p27</i>           | GTACGAGTGGCAAGAGGTGG     | TAGAAGAATCGTCGGTTGCAGG   |
| <i>β-actin</i>       | CATGTACGTTGCTATCCAGGC    | CTCCTTAATGTCACGCACGAT    |
| <i>Gapdh</i>         | GGAGCGAGATCCCTCCAAAAT    | GGCTGTTGTCA TACTTCTCATGG |
| <b>IP primers</b>    |                          |                          |
| <i>Mouse p21</i>     | GAAGGAGTGGGTTGGTCCTG     | GATCTGCGCCTGACTCCAAT     |
| <i>Human p21</i>     | CCGAAGTCAGTTCCTTGTGG     | CGCTCTCTCACCTCCTCTGA     |
| <i>Mouse p27</i>     | GCCGAGACCAATGGAGct       | AAACACCCCAAAAAGCACGAG    |
| <i>Human p27</i>     | ACTCGCCGTGTCAATCATT      | AACACCCCGAAAAGACGAG      |
| <i>Mouse Rb1</i>     | GTACCAGCAGAGATGACCGG     | GGCCAATTGATGCCACCTTG     |
| <i>Human Rb1</i>     | TCTTCCCTATCAGACCCCGG     | GGTCACTTAACGGGGCTAT      |
| <i>Mouse Acox1</i>   | TACCTTGCTTTCCCTTGCGGA    | CAATCCCCGACGCTGGTA       |
| <i>Human Acox1</i>   | ACGCCTCTGCCAGTAAAGAC     | CTTTTGCCAAATCCACCCGG     |
| <i>Mouse Acot1</i>   | CACCGGAGTCACCTGATAGAGTC  | GCCAGGGTGACAGACTTT       |
| <i>Human Pdk4</i>    | TCGGGAGAGGAAAAGGAGGT     | GACCCTGTCTGATGCAGCTT     |

| Hugo_Sym  | Frame_Shi | Frame_Shi | In_Frame_ | In_Frame_ | Missense_ | Nonsense_ | Nonstop_ | Splice_Site | Translator total | MutatedSa | AlteredSamples |   |
|-----------|-----------|-----------|-----------|-----------|-----------|-----------|----------|-------------|------------------|-----------|----------------|---|
| Sfi1      | 0         | 0         | 0         | 0         | 13        | 1         | 0        | 0           | 0                | 14        | 5              | 5 |
| Vmn2r114  | 0         | 0         | 0         | 0         | 9         | 0         | 0        | 0           | 0                | 9         | 5              | 5 |
| Pisd      | 0         | 0         | 0         | 0         | 7         | 0         | 0        | 0           | 0                | 7         | 5              | 5 |
| Muc6      | 0         | 0         | 0         | 0         | 7         | 0         | 0        | 0           | 0                | 7         | 4              | 4 |
| Eppk1     | 0         | 0         | 0         | 0         | 4         | 0         | 0        | 0           | 0                | 4         | 4              | 4 |
| Fn1       | 0         | 0         | 0         | 0         | 4         | 0         | 0        | 0           | 0                | 4         | 3              | 3 |
| Vmn2r116  | 0         | 0         | 0         | 0         | 3         | 1         | 0        | 0           | 0                | 4         | 3              | 3 |
| Asxl3     | 0         | 0         | 0         | 0         | 3         | 0         | 0        | 0           | 0                | 3         | 3              | 3 |
| Chd8      | 0         | 0         | 0         | 0         | 3         | 0         | 0        | 0           | 0                | 3         | 3              | 3 |
| Col9a1    | 0         | 0         | 0         | 0         | 3         | 0         | 0        | 0           | 0                | 3         | 3              | 3 |
| Copb2     | 0         | 0         | 0         | 0         | 3         | 0         | 0        | 0           | 0                | 3         | 3              | 3 |
| Ctnnb1    | 0         | 0         | 0         | 0         | 3         | 0         | 0        | 0           | 0                | 3         | 3              | 3 |
| Gm5458    | 0         | 0         | 0         | 0         | 3         | 0         | 0        | 0           | 0                | 3         | 3              | 3 |
| Helz2     | 0         | 0         | 0         | 0         | 3         | 0         | 0        | 0           | 0                | 3         | 3              | 3 |
| Kalrn     | 0         | 0         | 0         | 0         | 2         | 0         | 0        | 1           | 0                | 3         | 3              | 3 |
| Spef2     | 0         | 0         | 0         | 0         | 3         | 0         | 0        | 0           | 0                | 3         | 3              | 3 |
| Vmn2r115  | 0         | 0         | 0         | 0         | 3         | 0         | 0        | 0           | 0                | 3         | 3              | 3 |
| Bptf      | 0         | 0         | 0         | 0         | 4         | 0         | 0        | 0           | 0                | 4         | 2              | 2 |
| Smg1      | 0         | 0         | 0         | 0         | 4         | 0         | 0        | 0           | 0                | 4         | 2              | 2 |
| Arhgef5   | 0         | 0         | 0         | 0         | 3         | 0         | 0        | 0           | 0                | 3         | 2              | 2 |
| Ctnnd2    | 0         | 0         | 0         | 0         | 3         | 0         | 0        | 0           | 0                | 3         | 2              | 2 |
| Dst       | 0         | 0         | 0         | 0         | 3         | 0         | 0        | 0           | 0                | 3         | 2              | 2 |
| Lamc2     | 0         | 0         | 0         | 0         | 3         | 0         | 0        | 0           | 0                | 3         | 2              | 2 |
| Lrp5      | 0         | 0         | 0         | 0         | 3         | 0         | 0        | 0           | 0                | 3         | 2              | 2 |
| Myo18b    | 0         | 0         | 0         | 0         | 3         | 0         | 0        | 0           | 0                | 3         | 2              | 2 |
| Olf810    | 1         | 1         | 0         | 0         | 1         | 0         | 0        | 0           | 0                | 3         | 2              | 2 |
| Ugt1a8    | 1         | 1         | 0         | 0         | 1         | 0         | 0        | 0           | 0                | 3         | 2              | 2 |
| Vmn2r97   | 0         | 0         | 0         | 0         | 3         | 0         | 0        | 0           | 0                | 3         | 2              | 2 |
| Zfat      | 0         | 0         | 0         | 0         | 3         | 0         | 0        | 0           | 0                | 3         | 2              | 2 |
| 1700061G: | 0         | 0         | 0         | 0         | 2         | 0         | 0        | 0           | 0                | 2         | 2              | 2 |
| 4932438A: | 0         | 0         | 0         | 0         | 2         | 0         | 0        | 0           | 0                | 2         | 2              | 2 |
| 5830411N( | 0         | 0         | 0         | 0         | 2         | 0         | 0        | 0           | 0                | 2         | 2              | 2 |

|          |   |   |   |   |   |   |   |   |   |   |   |   |
|----------|---|---|---|---|---|---|---|---|---|---|---|---|
| Abi1     | 0 | 0 | 0 | 0 | 2 | 0 | 0 | 0 | 0 | 2 | 2 | 2 |
| Acs15    | 0 | 0 | 0 | 0 | 2 | 0 | 0 | 0 | 0 | 2 | 2 | 2 |
| Adgrb1   | 0 | 0 | 0 | 0 | 2 | 0 | 0 | 0 | 0 | 2 | 2 | 2 |
| Afdn     | 0 | 0 | 0 | 0 | 2 | 0 | 0 | 0 | 0 | 2 | 2 | 2 |
| Aff2     | 0 | 0 | 0 | 0 | 2 | 0 | 0 | 0 | 0 | 2 | 2 | 2 |
| Agtr1a   | 0 | 0 | 0 | 0 | 2 | 0 | 0 | 0 | 0 | 2 | 2 | 2 |
| Aknad1   | 0 | 0 | 0 | 0 | 2 | 0 | 0 | 0 | 0 | 2 | 2 | 2 |
| Alms1    | 0 | 0 | 0 | 0 | 2 | 0 | 0 | 0 | 0 | 2 | 2 | 2 |
| Arf1     | 0 | 0 | 0 | 0 | 2 | 0 | 0 | 0 | 0 | 2 | 2 | 2 |
| Arsb     | 0 | 0 | 0 | 0 | 2 | 0 | 0 | 0 | 0 | 2 | 2 | 2 |
| Aspm     | 0 | 0 | 0 | 0 | 2 | 0 | 0 | 0 | 0 | 2 | 2 | 2 |
| Atp8b4   | 0 | 0 | 0 | 0 | 2 | 0 | 0 | 0 | 0 | 2 | 2 | 2 |
| Babam2   | 0 | 0 | 0 | 0 | 2 | 0 | 0 | 0 | 0 | 2 | 2 | 2 |
| Brpf1    | 0 | 0 | 0 | 0 | 2 | 0 | 0 | 0 | 0 | 2 | 2 | 2 |
| Btaf1    | 0 | 0 | 0 | 0 | 2 | 0 | 0 | 0 | 0 | 2 | 2 | 2 |
| Btd      | 0 | 0 | 0 | 0 | 2 | 0 | 0 | 0 | 0 | 2 | 2 | 2 |
| C2cd3    | 0 | 0 | 0 | 0 | 2 | 0 | 0 | 0 | 0 | 2 | 2 | 2 |
| Cacna1c  | 0 | 0 | 0 | 0 | 2 | 0 | 0 | 0 | 0 | 2 | 2 | 2 |
| Cacna1f  | 0 | 0 | 0 | 0 | 2 | 0 | 0 | 0 | 0 | 2 | 2 | 2 |
| Casp8ap2 | 0 | 0 | 0 | 0 | 2 | 0 | 0 | 0 | 0 | 2 | 2 | 2 |
| Cbln4    | 0 | 0 | 0 | 0 | 2 | 0 | 0 | 0 | 0 | 2 | 2 | 2 |
| Ccdc173  | 0 | 0 | 0 | 0 | 2 | 0 | 0 | 0 | 0 | 2 | 2 | 2 |
| Cchcr1   | 0 | 0 | 0 | 0 | 2 | 0 | 0 | 0 | 0 | 2 | 2 | 2 |
| Cdon     | 0 | 0 | 0 | 0 | 1 | 1 | 0 | 0 | 0 | 2 | 2 | 2 |
| Cebpz    | 0 | 0 | 0 | 0 | 2 | 0 | 0 | 0 | 0 | 2 | 2 | 2 |
| Cemip    | 0 | 0 | 0 | 0 | 2 | 0 | 0 | 0 | 0 | 2 | 2 | 2 |
| Cep68    | 0 | 0 | 0 | 0 | 2 | 0 | 0 | 0 | 0 | 2 | 2 | 2 |
| Chil5    | 0 | 0 | 0 | 0 | 2 | 0 | 0 | 0 | 0 | 2 | 2 | 2 |
| Col12a1  | 0 | 0 | 0 | 0 | 2 | 0 | 0 | 0 | 0 | 2 | 2 | 2 |
| Col22a1  | 0 | 0 | 0 | 0 | 2 | 0 | 0 | 0 | 0 | 2 | 2 | 2 |
| Col5a2   | 0 | 0 | 0 | 0 | 2 | 0 | 0 | 0 | 0 | 2 | 2 | 2 |
| Col6a6   | 0 | 0 | 0 | 0 | 2 | 0 | 0 | 0 | 0 | 2 | 2 | 2 |
| Cpd      | 0 | 0 | 0 | 0 | 2 | 0 | 0 | 0 | 0 | 2 | 2 | 2 |



|          |   |   |   |   |   |   |   |   |   |   |   |   |
|----------|---|---|---|---|---|---|---|---|---|---|---|---|
| Catal    | 0 | 0 | 0 | 0 | 2 | 0 | 0 | 0 | 0 | 2 | 2 | 2 |
| Cyp2c50  | 0 | 0 | 0 | 0 | 2 | 0 | 0 | 0 | 0 | 2 | 2 | 2 |
| Dact2    | 0 | 0 | 0 | 0 | 2 | 0 | 0 | 0 | 0 | 2 | 2 | 2 |
| Dchs1    | 0 | 0 | 0 | 0 | 2 | 0 | 0 | 0 | 0 | 2 | 2 | 2 |
| Dlg5     | 0 | 0 | 0 | 0 | 2 | 0 | 0 | 0 | 0 | 2 | 2 | 2 |
| Dnah7a   | 0 | 0 | 0 | 0 | 2 | 0 | 0 | 0 | 0 | 2 | 2 | 2 |
| Dnah7c   | 0 | 0 | 0 | 0 | 2 | 0 | 0 | 0 | 0 | 2 | 2 | 2 |
| Dpyd     | 0 | 0 | 0 | 0 | 2 | 0 | 0 | 0 | 0 | 2 | 2 | 2 |
| Dsg1c    | 0 | 0 | 0 | 0 | 2 | 0 | 0 | 0 | 0 | 2 | 2 | 2 |
| Dync1h1  | 0 | 0 | 0 | 0 | 2 | 0 | 0 | 0 | 0 | 2 | 2 | 2 |
| Efcab6   | 0 | 0 | 0 | 0 | 1 | 1 | 0 | 0 | 0 | 2 | 2 | 2 |
| Ermard   | 0 | 0 | 0 | 0 | 2 | 0 | 0 | 0 | 0 | 2 | 2 | 2 |
| Faim2    | 0 | 0 | 0 | 0 | 2 | 0 | 0 | 0 | 0 | 2 | 2 | 2 |
| Fam120b  | 0 | 0 | 0 | 0 | 2 | 0 | 0 | 0 | 0 | 2 | 2 | 2 |
| Fam171a1 | 0 | 0 | 0 | 0 | 2 | 0 | 0 | 0 | 0 | 2 | 2 | 2 |
| Fan1     | 0 | 0 | 0 | 0 | 1 | 0 | 0 | 1 | 0 | 2 | 2 | 2 |
| Fbn2     | 0 | 0 | 0 | 0 | 2 | 0 | 0 | 0 | 0 | 2 | 2 | 2 |
| Fgd5     | 0 | 0 | 0 | 0 | 2 | 0 | 0 | 0 | 0 | 2 | 2 | 2 |
| Flvcr2   | 0 | 0 | 0 | 0 | 2 | 0 | 0 | 0 | 0 | 2 | 2 | 2 |
| Fndc3a   | 0 | 0 | 0 | 0 | 2 | 0 | 0 | 0 | 0 | 2 | 2 | 2 |
| Garem2   | 0 | 0 | 0 | 0 | 1 | 1 | 0 | 0 | 0 | 2 | 2 | 2 |
| Ggnbp2   | 0 | 0 | 0 | 0 | 2 | 0 | 0 | 0 | 0 | 2 | 2 | 2 |
| Gm11487  | 0 | 0 | 0 | 0 | 2 | 0 | 0 | 0 | 0 | 2 | 2 | 2 |
| Gmeb2    | 0 | 0 | 0 | 0 | 1 | 0 | 0 | 1 | 0 | 2 | 2 | 2 |
| Golga4   | 0 | 0 | 0 | 0 | 2 | 0 | 0 | 0 | 0 | 2 | 2 | 2 |
| Gppbp1   | 0 | 0 | 0 | 0 | 2 | 0 | 0 | 0 | 0 | 2 | 2 | 2 |
| Guf1     | 0 | 0 | 0 | 0 | 2 | 0 | 0 | 0 | 0 | 2 | 2 | 2 |
| Hdac10   | 0 | 0 | 0 | 0 | 2 | 0 | 0 | 0 | 0 | 2 | 2 | 2 |
| Herc1    | 0 | 0 | 0 | 0 | 2 | 0 | 0 | 0 | 0 | 2 | 2 | 2 |
| Herc2    | 0 | 0 | 0 | 0 | 2 | 0 | 0 | 0 | 0 | 2 | 2 | 2 |
| Hmcn2    | 0 | 0 | 0 | 0 | 2 | 0 | 0 | 0 | 0 | 2 | 2 | 2 |
| Hnrnpul2 | 0 | 0 | 0 | 0 | 1 | 1 | 0 | 0 | 0 | 2 | 2 | 2 |
| Insr     | 0 | 0 | 0 | 0 | 2 | 0 | 0 | 0 | 0 | 2 | 2 | 2 |

|          |   |   |   |   |   |   |   |   |   |   |   |   |
|----------|---|---|---|---|---|---|---|---|---|---|---|---|
| Iws1     | 0 | 0 | 0 | 0 | 2 | 0 | 0 | 0 | 0 | 2 | 2 | 2 |
| Lats1    | 0 | 0 | 0 | 0 | 2 | 0 | 0 | 0 | 0 | 2 | 2 | 2 |
| Lemd3    | 0 | 0 | 0 | 0 | 2 | 0 | 0 | 0 | 0 | 2 | 2 | 2 |
| Lrit1    | 0 | 0 | 0 | 0 | 2 | 0 | 0 | 0 | 0 | 2 | 2 | 2 |
| Lrrcc1   | 0 | 0 | 0 | 0 | 1 | 1 | 0 | 0 | 0 | 2 | 2 | 2 |
| Lrrk2    | 0 | 0 | 0 | 0 | 2 | 0 | 0 | 0 | 0 | 2 | 2 | 2 |
| March7   | 0 | 0 | 0 | 0 | 2 | 0 | 0 | 0 | 0 | 2 | 2 | 2 |
| Mettl15  | 0 | 0 | 0 | 0 | 2 | 0 | 0 | 0 | 0 | 2 | 2 | 2 |
| Muc20    | 0 | 0 | 0 | 0 | 1 | 1 | 0 | 0 | 0 | 2 | 2 | 2 |
| Muc4     | 0 | 0 | 0 | 0 | 2 | 0 | 0 | 0 | 0 | 2 | 2 | 2 |
| Myh15    | 0 | 0 | 0 | 0 | 2 | 0 | 0 | 0 | 0 | 2 | 2 | 2 |
| Myom2    | 0 | 0 | 0 | 0 | 1 | 0 | 0 | 1 | 0 | 2 | 2 | 2 |
| Nek10    | 0 | 0 | 0 | 0 | 1 | 0 | 0 | 1 | 0 | 2 | 2 | 2 |
| Nlrc5    | 0 | 0 | 0 | 0 | 2 | 0 | 0 | 0 | 0 | 2 | 2 | 2 |
| Npepl1   | 0 | 0 | 0 | 0 | 2 | 0 | 0 | 0 | 0 | 2 | 2 | 2 |
| Nrip1    | 0 | 0 | 0 | 0 | 2 | 0 | 0 | 0 | 0 | 2 | 2 | 2 |
| Nsd2     | 0 | 0 | 0 | 0 | 2 | 0 | 0 | 0 | 0 | 2 | 2 | 2 |
| Nup85    | 0 | 0 | 0 | 0 | 1 | 0 | 0 | 1 | 0 | 2 | 2 | 2 |
| Olfcr352 | 0 | 0 | 0 | 0 | 2 | 0 | 0 | 0 | 0 | 2 | 2 | 2 |
| Olfcr566 | 0 | 0 | 0 | 0 | 2 | 0 | 0 | 0 | 0 | 2 | 2 | 2 |
| Olfcr881 | 1 | 0 | 0 | 0 | 1 | 0 | 0 | 0 | 0 | 2 | 2 | 2 |
| Olfcr963 | 0 | 0 | 0 | 0 | 2 | 0 | 0 | 0 | 0 | 2 | 2 | 2 |
| Parg     | 0 | 0 | 0 | 0 | 2 | 0 | 0 | 0 | 0 | 2 | 2 | 2 |
| Pcdhb4   | 0 | 0 | 0 | 0 | 2 | 0 | 0 | 0 | 0 | 2 | 2 | 2 |
| Pclo     | 0 | 0 | 0 | 0 | 2 | 0 | 0 | 0 | 0 | 2 | 2 | 2 |
| Pdzd7    | 0 | 0 | 0 | 0 | 2 | 0 | 0 | 0 | 0 | 2 | 2 | 2 |
| Pla2r1   | 0 | 0 | 0 | 0 | 2 | 0 | 0 | 0 | 0 | 2 | 2 | 2 |
| Plxna4   | 0 | 0 | 0 | 0 | 2 | 0 | 0 | 0 | 0 | 2 | 2 | 2 |
| Poc1a    | 0 | 0 | 0 | 0 | 2 | 0 | 0 | 0 | 0 | 2 | 2 | 2 |
| Psme4    | 0 | 0 | 0 | 0 | 1 | 1 | 0 | 0 | 0 | 2 | 2 | 2 |
| Psrc1    | 0 | 0 | 0 | 0 | 2 | 0 | 0 | 0 | 0 | 2 | 2 | 2 |
| Pzp      | 0 | 0 | 0 | 0 | 2 | 0 | 0 | 0 | 0 | 2 | 2 | 2 |
| Rab3gap2 | 0 | 0 | 0 | 0 | 2 | 0 | 0 | 0 | 0 | 2 | 2 | 2 |

|          |   |   |   |   |   |   |   |   |   |   |   |   |
|----------|---|---|---|---|---|---|---|---|---|---|---|---|
| Rftn1    | 0 | 0 | 0 | 0 | 2 | 0 | 0 | 0 | 0 | 2 | 2 | 2 |
| Rheb     | 0 | 0 | 0 | 0 | 0 | 0 | 0 | 2 | 0 | 2 | 2 | 2 |
| S1pr1    | 0 | 0 | 0 | 0 | 2 | 0 | 0 | 0 | 0 | 2 | 2 | 2 |
| Sall4    | 0 | 0 | 0 | 0 | 2 | 0 | 0 | 0 | 0 | 2 | 2 | 2 |
| Sec63    | 0 | 0 | 0 | 0 | 0 | 2 | 0 | 0 | 0 | 2 | 2 | 2 |
| Serpind1 | 0 | 0 | 0 | 0 | 2 | 0 | 0 | 0 | 0 | 2 | 2 | 2 |
| Sh3pxd2a | 0 | 0 | 0 | 0 | 2 | 0 | 0 | 0 | 0 | 2 | 2 | 2 |
| Shc3     | 0 | 0 | 0 | 0 | 2 | 0 | 0 | 0 | 0 | 2 | 2 | 2 |
| Six4     | 0 | 0 | 0 | 0 | 2 | 0 | 0 | 0 | 0 | 2 | 2 | 2 |
| Skint6   | 0 | 0 | 0 | 0 | 1 | 0 | 0 | 1 | 0 | 2 | 2 | 2 |
| Slc17a7  | 0 | 0 | 0 | 0 | 2 | 0 | 0 | 0 | 0 | 2 | 2 | 2 |
| Slc39a6  | 0 | 0 | 0 | 0 | 2 | 0 | 0 | 0 | 0 | 2 | 2 | 2 |
| Slco2a1  | 0 | 0 | 0 | 0 | 0 | 2 | 0 | 0 | 0 | 2 | 2 | 2 |
| Snopc4   | 0 | 0 | 0 | 0 | 2 | 0 | 0 | 0 | 0 | 2 | 2 | 2 |
| Snx19    | 0 | 0 | 0 | 0 | 1 | 0 | 0 | 1 | 0 | 2 | 2 | 2 |
| Spen     | 0 | 0 | 0 | 0 | 2 | 0 | 0 | 0 | 0 | 2 | 2 | 2 |
| Spry1    | 0 | 0 | 0 | 0 | 2 | 0 | 0 | 0 | 0 | 2 | 2 | 2 |
| Sym      | 0 | 0 | 0 | 0 | 2 | 0 | 0 | 0 | 0 | 2 | 2 | 2 |
| Tanc1    | 0 | 0 | 0 | 0 | 2 | 0 | 0 | 0 | 0 | 2 | 2 | 2 |
| Tenm3    | 0 | 0 | 0 | 0 | 2 | 0 | 0 | 0 | 0 | 2 | 2 | 2 |
| Thsd7b   | 0 | 0 | 0 | 0 | 2 | 0 | 0 | 0 | 0 | 2 | 2 | 2 |
| Tinag    | 0 | 0 | 0 | 0 | 2 | 0 | 0 | 0 | 0 | 2 | 2 | 2 |
| Tnxb     | 0 | 0 | 0 | 0 | 2 | 0 | 0 | 0 | 0 | 2 | 2 | 2 |
| Traf3    | 0 | 0 | 0 | 0 | 2 | 0 | 0 | 0 | 0 | 2 | 2 | 2 |
| Trip11   | 0 | 0 | 0 | 0 | 2 | 0 | 0 | 0 | 0 | 2 | 2 | 2 |
| Trmt5    | 0 | 0 | 0 | 0 | 2 | 0 | 0 | 0 | 0 | 2 | 2 | 2 |
| Tro      | 0 | 0 | 0 | 0 | 2 | 0 | 0 | 0 | 0 | 2 | 2 | 2 |
| Usp6nl   | 0 | 0 | 0 | 0 | 2 | 0 | 0 | 0 | 0 | 2 | 2 | 2 |
| Utp20    | 0 | 0 | 0 | 0 | 1 | 1 | 0 | 0 | 0 | 2 | 2 | 2 |
| Vcan     | 0 | 0 | 0 | 0 | 2 | 0 | 0 | 0 | 0 | 2 | 2 | 2 |
| Vmn2r14  | 0 | 0 | 0 | 0 | 1 | 1 | 0 | 0 | 0 | 2 | 2 | 2 |
| Vmn2r16  | 0 | 0 | 0 | 0 | 2 | 0 | 0 | 0 | 0 | 2 | 2 | 2 |
| Vmn2r17  | 0 | 0 | 0 | 0 | 2 | 0 | 0 | 0 | 0 | 2 | 2 | 2 |

|          |   |   |   |   |   |   |   |   |   |   |   |   |
|----------|---|---|---|---|---|---|---|---|---|---|---|---|
| Vmn2r32  | 1 | 0 | 0 | 0 | 1 | 0 | 0 | 0 | 0 | 2 | 2 | 2 |
| Vmn2r33  | 0 | 0 | 0 | 0 | 2 | 0 | 0 | 0 | 0 | 2 | 2 | 2 |
| Vps13b   | 0 | 0 | 0 | 0 | 2 | 0 | 0 | 0 | 0 | 2 | 2 | 2 |
| Wdfy4    | 0 | 0 | 0 | 0 | 2 | 0 | 0 | 0 | 0 | 2 | 2 | 2 |
| Wwc1     | 0 | 0 | 0 | 0 | 2 | 0 | 0 | 0 | 0 | 2 | 2 | 2 |
| Zan      | 0 | 0 | 0 | 0 | 2 | 0 | 0 | 0 | 0 | 2 | 2 | 2 |
| Zbtb7b   | 0 | 0 | 0 | 0 | 2 | 0 | 0 | 0 | 0 | 2 | 2 | 2 |
| Zfpm2    | 0 | 0 | 0 | 0 | 2 | 0 | 0 | 0 | 0 | 2 | 2 | 2 |
| Zgrf1    | 0 | 0 | 0 | 0 | 1 | 0 | 0 | 1 | 0 | 2 | 2 | 2 |
| Zmynd8   | 0 | 0 | 0 | 0 | 2 | 0 | 0 | 0 | 0 | 2 | 2 | 2 |
| Cic      | 0 | 0 | 0 | 0 | 3 | 0 | 0 | 0 | 0 | 3 | 1 | 1 |
| Abcc3    | 0 | 0 | 0 | 0 | 2 | 0 | 0 | 0 | 0 | 2 | 1 | 1 |
| Acta2    | 0 | 0 | 0 | 0 | 1 | 0 | 0 | 1 | 0 | 2 | 1 | 1 |
| Ago3     | 0 | 0 | 0 | 0 | 1 | 1 | 0 | 0 | 0 | 2 | 1 | 1 |
| Amotl1   | 0 | 0 | 0 | 0 | 2 | 0 | 0 | 0 | 0 | 2 | 1 | 1 |
| Arfgef1  | 0 | 0 | 0 | 0 | 1 | 1 | 0 | 0 | 0 | 2 | 1 | 1 |
| Arhgap17 | 0 | 0 | 0 | 0 | 2 | 0 | 0 | 0 | 0 | 2 | 1 | 1 |
| Chd2     | 0 | 0 | 0 | 0 | 1 | 0 | 0 | 1 | 0 | 2 | 1 | 1 |
| Cpsf1    | 0 | 0 | 0 | 0 | 2 | 0 | 0 | 0 | 0 | 2 | 1 | 1 |
| Csmc3    | 0 | 0 | 0 | 0 | 1 | 0 | 0 | 1 | 0 | 2 | 1 | 1 |
| Cwf19l2  | 0 | 0 | 0 | 0 | 2 | 0 | 0 | 0 | 0 | 2 | 1 | 1 |
| Fry      | 0 | 0 | 0 | 0 | 2 | 0 | 0 | 0 | 0 | 2 | 1 | 1 |
| Fsip2    | 0 | 0 | 0 | 0 | 2 | 0 | 0 | 0 | 0 | 2 | 1 | 1 |
| Gins1    | 0 | 0 | 0 | 0 | 2 | 0 | 0 | 0 | 0 | 2 | 1 | 1 |
| Gpr22    | 0 | 0 | 0 | 0 | 2 | 0 | 0 | 0 | 0 | 2 | 1 | 1 |
| Hcfc2    | 0 | 0 | 0 | 0 | 2 | 0 | 0 | 0 | 0 | 2 | 1 | 1 |
| Hcn1     | 0 | 0 | 0 | 0 | 2 | 0 | 0 | 0 | 0 | 2 | 1 | 1 |
| Helq     | 0 | 0 | 0 | 0 | 2 | 0 | 0 | 0 | 0 | 2 | 1 | 1 |
| Hoxb3    | 0 | 0 | 0 | 0 | 2 | 0 | 0 | 0 | 0 | 2 | 1 | 1 |
| Hps5     | 0 | 0 | 0 | 0 | 2 | 0 | 0 | 0 | 0 | 2 | 1 | 1 |
| Itpr2    | 0 | 0 | 0 | 0 | 2 | 0 | 0 | 0 | 0 | 2 | 1 | 1 |
| Jam2     | 0 | 0 | 0 | 0 | 2 | 0 | 0 | 0 | 0 | 2 | 1 | 1 |
| Jarid2   | 0 | 0 | 0 | 0 | 2 | 0 | 0 | 0 | 0 | 2 | 1 | 1 |

|           |   |   |   |   |   |   |   |   |   |   |   |   |
|-----------|---|---|---|---|---|---|---|---|---|---|---|---|
| Kdsr      | 0 | 0 | 0 | 0 | 2 | 0 | 0 | 0 | 0 | 2 | 1 | 1 |
| Lilra6    | 0 | 0 | 0 | 0 | 2 | 0 | 0 | 0 | 0 | 2 | 1 | 1 |
| Magi3     | 0 | 0 | 0 | 0 | 1 | 0 | 0 | 1 | 0 | 2 | 1 | 1 |
| Mroh2a    | 0 | 0 | 0 | 0 | 1 | 1 | 0 | 0 | 0 | 2 | 1 | 1 |
| Mtor      | 0 | 0 | 0 | 0 | 1 | 0 | 0 | 1 | 0 | 2 | 1 | 1 |
| Nol11     | 0 | 0 | 0 | 0 | 2 | 0 | 0 | 0 | 0 | 2 | 1 | 1 |
| Psg28     | 0 | 0 | 0 | 0 | 2 | 0 | 0 | 0 | 0 | 2 | 1 | 1 |
| R3hdm2    | 0 | 0 | 0 | 0 | 2 | 0 | 0 | 0 | 0 | 2 | 1 | 1 |
| Scg2      | 0 | 0 | 0 | 0 | 2 | 0 | 0 | 0 | 0 | 2 | 1 | 1 |
| Setd5     | 0 | 1 | 0 | 0 | 0 | 1 | 0 | 0 | 0 | 2 | 1 | 1 |
| Slco1a5   | 0 | 0 | 0 | 0 | 2 | 0 | 0 | 0 | 0 | 2 | 1 | 1 |
| Spata31d1 | 0 | 0 | 0 | 0 | 2 | 0 | 0 | 0 | 0 | 2 | 1 | 1 |
| Srcap     | 0 | 0 | 0 | 0 | 2 | 0 | 0 | 0 | 0 | 2 | 1 | 1 |
| Stab1     | 0 | 0 | 0 | 0 | 1 | 0 | 0 | 1 | 0 | 2 | 1 | 1 |
| Thbs4     | 0 | 0 | 0 | 0 | 2 | 0 | 0 | 0 | 0 | 2 | 1 | 1 |
| Tmem208   | 0 | 0 | 0 | 0 | 1 | 1 | 0 | 0 | 0 | 2 | 1 | 1 |
| Vit       | 0 | 0 | 0 | 0 | 1 | 0 | 0 | 1 | 0 | 2 | 1 | 1 |
| Vmn1r226  | 0 | 0 | 0 | 0 | 2 | 0 | 0 | 0 | 0 | 2 | 1 | 1 |
| Vmn2r117  | 0 | 0 | 1 | 0 | 0 | 0 | 0 | 1 | 0 | 2 | 1 | 1 |
| Vmn2r52   | 0 | 1 | 0 | 0 | 1 | 0 | 0 | 0 | 0 | 2 | 1 | 1 |
| Whamm     | 0 | 0 | 0 | 0 | 2 | 0 | 0 | 0 | 0 | 2 | 1 | 1 |
| Zfp352    | 0 | 0 | 0 | 0 | 2 | 0 | 0 | 0 | 0 | 2 | 1 | 1 |
| Zfp800    | 0 | 0 | 0 | 0 | 2 | 0 | 0 | 0 | 0 | 2 | 1 | 1 |
| 1110059E2 | 0 | 0 | 0 | 0 | 1 | 0 | 0 | 0 | 0 | 1 | 1 | 1 |
| 1700001C1 | 0 | 0 | 0 | 0 | 1 | 0 | 0 | 0 | 0 | 1 | 1 | 1 |
| 1700001L1 | 0 | 0 | 0 | 0 | 1 | 0 | 0 | 0 | 0 | 1 | 1 | 1 |
| 1700007G: | 0 | 0 | 0 | 0 | 1 | 0 | 0 | 0 | 0 | 1 | 1 | 1 |
| 1700009N: | 0 | 0 | 0 | 0 | 1 | 0 | 0 | 0 | 0 | 1 | 1 | 1 |
| 1700012BC | 0 | 0 | 0 | 0 | 1 | 0 | 0 | 0 | 0 | 1 | 1 | 1 |
| 1700020N( | 0 | 0 | 0 | 0 | 1 | 0 | 0 | 0 | 0 | 1 | 1 | 1 |
| 1700029J0 | 0 | 0 | 0 | 0 | 1 | 0 | 0 | 0 | 0 | 1 | 1 | 1 |
| 1700031FC | 0 | 0 | 0 | 0 | 1 | 0 | 0 | 0 | 0 | 1 | 1 | 1 |
| 1810013L2 | 0 | 0 | 0 | 0 | 1 | 0 | 0 | 0 | 0 | 1 | 1 | 1 |

|           |   |   |   |   |   |   |   |   |   |   |   |   |
|-----------|---|---|---|---|---|---|---|---|---|---|---|---|
| 2010300CC | 0 | 0 | 0 | 0 | 1 | 0 | 0 | 0 | 0 | 1 | 1 | 1 |
| 2210408I2 | 0 | 0 | 0 | 0 | 1 | 0 | 0 | 0 | 0 | 1 | 1 | 1 |
| 2310035C2 | 0 | 0 | 0 | 0 | 1 | 0 | 0 | 0 | 0 | 1 | 1 | 1 |
| 2410089EC | 0 | 0 | 0 | 0 | 1 | 0 | 0 | 0 | 0 | 1 | 1 | 1 |
| 3110035E1 | 0 | 0 | 0 | 0 | 1 | 0 | 0 | 0 | 0 | 1 | 1 | 1 |
| 4833420G: | 0 | 0 | 0 | 0 | 1 | 0 | 0 | 0 | 0 | 1 | 1 | 1 |
| 4930453N: | 0 | 0 | 0 | 0 | 1 | 0 | 0 | 0 | 0 | 1 | 1 | 1 |
| 4930474N( | 0 | 0 | 0 | 0 | 1 | 0 | 0 | 0 | 0 | 1 | 1 | 1 |
| 4930503L1 | 0 | 0 | 0 | 0 | 1 | 0 | 0 | 0 | 0 | 1 | 1 | 1 |
| 4930505A( | 0 | 0 | 0 | 0 | 1 | 0 | 0 | 0 | 0 | 1 | 1 | 1 |
| 4930516K2 | 0 | 0 | 0 | 0 | 1 | 0 | 0 | 0 | 0 | 1 | 1 | 1 |
| 4930572O( | 0 | 0 | 0 | 0 | 1 | 0 | 0 | 0 | 0 | 1 | 1 | 1 |
| 4931400O( | 0 | 0 | 0 | 0 | 1 | 0 | 0 | 0 | 0 | 1 | 1 | 1 |
| 4931423N: | 0 | 0 | 0 | 0 | 1 | 0 | 0 | 0 | 0 | 1 | 1 | 1 |
| 4932411N: | 0 | 0 | 0 | 0 | 1 | 0 | 0 | 0 | 0 | 1 | 1 | 1 |
| 4933409G( | 0 | 0 | 0 | 0 | 1 | 0 | 0 | 0 | 0 | 1 | 1 | 1 |
| 4933421I0 | 0 | 0 | 0 | 0 | 1 | 0 | 0 | 0 | 0 | 1 | 1 | 1 |
| 5730455P1 | 0 | 0 | 0 | 0 | 1 | 0 | 0 | 0 | 0 | 1 | 1 | 1 |
| 6430571L1 | 0 | 0 | 0 | 0 | 1 | 0 | 0 | 0 | 0 | 1 | 1 | 1 |
| A2m       | 0 | 0 | 0 | 0 | 1 | 0 | 0 | 0 | 0 | 1 | 1 | 1 |
| A430105I1 | 0 | 0 | 0 | 0 | 1 | 0 | 0 | 0 | 0 | 1 | 1 | 1 |
| A530064D( | 0 | 0 | 0 | 0 | 1 | 0 | 0 | 0 | 0 | 1 | 1 | 1 |
| AI182371  | 0 | 0 | 0 | 0 | 1 | 0 | 0 | 0 | 0 | 1 | 1 | 1 |
| AU018091  | 0 | 0 | 0 | 0 | 1 | 0 | 0 | 0 | 0 | 1 | 1 | 1 |
| AW822073  | 0 | 0 | 0 | 0 | 1 | 0 | 0 | 0 | 0 | 1 | 1 | 1 |
| Aak1      | 0 | 0 | 0 | 0 | 1 | 0 | 0 | 0 | 0 | 1 | 1 | 1 |
| Abca4     | 0 | 0 | 0 | 0 | 1 | 0 | 0 | 0 | 0 | 1 | 1 | 1 |
| Abca5     | 0 | 0 | 0 | 0 | 1 | 0 | 0 | 0 | 0 | 1 | 1 | 1 |
| Abca7     | 0 | 0 | 0 | 0 | 1 | 0 | 0 | 0 | 0 | 1 | 1 | 1 |
| Abca8b    | 0 | 0 | 0 | 0 | 0 | 0 | 0 | 1 | 0 | 1 | 1 | 1 |
| Abcb10    | 0 | 0 | 0 | 0 | 1 | 0 | 0 | 0 | 0 | 1 | 1 | 1 |
| Abcb5     | 0 | 0 | 0 | 0 | 1 | 0 | 0 | 0 | 0 | 1 | 1 | 1 |
| Abcb7     | 0 | 0 | 0 | 0 | 1 | 0 | 0 | 0 | 0 | 1 | 1 | 1 |

|          |   |   |   |   |   |   |   |   |   |   |   |   |
|----------|---|---|---|---|---|---|---|---|---|---|---|---|
| Abcc12   | 0 | 0 | 0 | 0 | 1 | 0 | 0 | 0 | 0 | 1 | 1 | 1 |
| Abcc4    | 0 | 0 | 0 | 0 | 1 | 0 | 0 | 0 | 0 | 1 | 1 | 1 |
| Acacb    | 0 | 0 | 0 | 0 | 1 | 0 | 0 | 0 | 0 | 1 | 1 | 1 |
| Acadm    | 0 | 0 | 0 | 0 | 1 | 0 | 0 | 0 | 0 | 1 | 1 | 1 |
| Acads    | 0 | 0 | 0 | 0 | 1 | 0 | 0 | 0 | 0 | 1 | 1 | 1 |
| Aco2     | 0 | 0 | 0 | 0 | 1 | 0 | 0 | 0 | 0 | 1 | 1 | 1 |
| Acot6    | 0 | 0 | 0 | 0 | 1 | 0 | 0 | 0 | 0 | 1 | 1 | 1 |
| Acrv1    | 0 | 0 | 0 | 0 | 1 | 0 | 0 | 0 | 0 | 1 | 1 | 1 |
| Acsi3    | 0 | 0 | 0 | 0 | 1 | 0 | 0 | 0 | 0 | 1 | 1 | 1 |
| Acsi6    | 0 | 0 | 0 | 0 | 1 | 0 | 0 | 0 | 0 | 1 | 1 | 1 |
| Acss2    | 0 | 0 | 0 | 0 | 1 | 0 | 0 | 0 | 0 | 1 | 1 | 1 |
| Acss3    | 0 | 0 | 0 | 0 | 1 | 0 | 0 | 0 | 0 | 1 | 1 | 1 |
| Actb     | 0 | 0 | 0 | 0 | 1 | 0 | 0 | 0 | 0 | 1 | 1 | 1 |
| Actl11   | 0 | 0 | 0 | 0 | 1 | 0 | 0 | 0 | 0 | 1 | 1 | 1 |
| Actr6    | 0 | 0 | 0 | 0 | 1 | 0 | 0 | 0 | 0 | 1 | 1 | 1 |
| Acvr2b   | 0 | 0 | 0 | 0 | 1 | 0 | 0 | 0 | 0 | 1 | 1 | 1 |
| Adam20   | 0 | 0 | 0 | 0 | 1 | 0 | 0 | 0 | 0 | 1 | 1 | 1 |
| Adam24   | 0 | 0 | 0 | 0 | 1 | 0 | 0 | 0 | 0 | 1 | 1 | 1 |
| Adam4    | 0 | 0 | 0 | 0 | 1 | 0 | 0 | 0 | 0 | 1 | 1 | 1 |
| Adam6b   | 0 | 0 | 0 | 0 | 1 | 0 | 0 | 0 | 0 | 1 | 1 | 1 |
| Adam7    | 0 | 0 | 0 | 0 | 0 | 0 | 0 | 1 | 0 | 1 | 1 | 1 |
| Adam9    | 0 | 0 | 0 | 0 | 1 | 0 | 0 | 0 | 0 | 1 | 1 | 1 |
| Adamts10 | 0 | 0 | 0 | 0 | 1 | 0 | 0 | 0 | 0 | 1 | 1 | 1 |
| Adamts14 | 0 | 0 | 0 | 0 | 1 | 0 | 0 | 0 | 0 | 1 | 1 | 1 |
| Adamts18 | 0 | 0 | 0 | 0 | 1 | 0 | 0 | 0 | 0 | 1 | 1 | 1 |
| Adamts20 | 0 | 0 | 0 | 0 | 1 | 0 | 0 | 0 | 0 | 1 | 1 | 1 |
| Adamts7  | 0 | 0 | 0 | 0 | 1 | 0 | 0 | 0 | 0 | 1 | 1 | 1 |
| Adamts8  | 0 | 0 | 0 | 0 | 1 | 0 | 0 | 0 | 0 | 1 | 1 | 1 |
| Adamtsl1 | 0 | 0 | 0 | 0 | 1 | 0 | 0 | 0 | 0 | 1 | 1 | 1 |
| Adck2    | 0 | 0 | 0 | 0 | 1 | 0 | 0 | 0 | 0 | 1 | 1 | 1 |
| Adcy10   | 0 | 0 | 0 | 0 | 1 | 0 | 0 | 0 | 0 | 1 | 1 | 1 |
| Adcy9    | 0 | 0 | 0 | 0 | 0 | 1 | 0 | 0 | 0 | 1 | 1 | 1 |
| Add2     | 0 | 0 | 0 | 0 | 1 | 0 | 0 | 0 | 0 | 1 | 1 | 1 |

|         |   |   |   |   |   |   |   |   |   |   |   |   |
|---------|---|---|---|---|---|---|---|---|---|---|---|---|
| Adgra2  | 0 | 0 | 0 | 0 | 1 | 0 | 0 | 0 | 0 | 1 | 1 | 1 |
| Adgre1  | 0 | 0 | 0 | 0 | 0 | 1 | 0 | 0 | 0 | 1 | 1 | 1 |
| Adgrf3  | 0 | 0 | 0 | 0 | 1 | 0 | 0 | 0 | 0 | 1 | 1 | 1 |
| Adgrg4  | 0 | 0 | 0 | 0 | 1 | 0 | 0 | 0 | 0 | 1 | 1 | 1 |
| Adgrg7  | 0 | 0 | 0 | 0 | 1 | 0 | 0 | 0 | 0 | 1 | 1 | 1 |
| Adgrl1  | 0 | 0 | 0 | 0 | 0 | 1 | 0 | 0 | 0 | 1 | 1 | 1 |
| Adgrl2  | 0 | 0 | 0 | 0 | 1 | 0 | 0 | 0 | 0 | 1 | 1 | 1 |
| Adgrl3  | 0 | 0 | 0 | 0 | 1 | 0 | 0 | 0 | 0 | 1 | 1 | 1 |
| Adh6a   | 0 | 0 | 0 | 0 | 1 | 0 | 0 | 0 | 0 | 1 | 1 | 1 |
| Adh7    | 0 | 0 | 0 | 0 | 1 | 0 | 0 | 0 | 0 | 1 | 1 | 1 |
| Adi1    | 0 | 0 | 0 | 0 | 1 | 0 | 0 | 0 | 0 | 1 | 1 | 1 |
| Adpgk   | 0 | 0 | 0 | 0 | 1 | 0 | 0 | 0 | 0 | 1 | 1 | 1 |
| Aebp1   | 0 | 0 | 0 | 0 | 1 | 0 | 0 | 0 | 0 | 1 | 1 | 1 |
| Aff1    | 0 | 0 | 0 | 0 | 1 | 0 | 0 | 0 | 0 | 1 | 1 | 1 |
| Agbl1   | 0 | 0 | 0 | 0 | 1 | 0 | 0 | 0 | 0 | 1 | 1 | 1 |
| Ahsa1   | 0 | 0 | 0 | 0 | 1 | 0 | 0 | 0 | 0 | 1 | 1 | 1 |
| Akap10  | 0 | 0 | 0 | 0 | 1 | 0 | 0 | 0 | 0 | 1 | 1 | 1 |
| Akap12  | 0 | 0 | 0 | 0 | 1 | 0 | 0 | 0 | 0 | 1 | 1 | 1 |
| Akap6   | 0 | 0 | 0 | 0 | 1 | 0 | 0 | 0 | 0 | 1 | 1 | 1 |
| Akap9   | 0 | 0 | 0 | 0 | 1 | 0 | 0 | 0 | 0 | 1 | 1 | 1 |
| Akna    | 0 | 0 | 0 | 0 | 1 | 0 | 0 | 0 | 0 | 1 | 1 | 1 |
| Akr1b10 | 0 | 0 | 0 | 0 | 1 | 0 | 0 | 0 | 0 | 1 | 1 | 1 |
| Aldh1b1 | 0 | 0 | 0 | 0 | 1 | 0 | 0 | 0 | 0 | 1 | 1 | 1 |
| Alk     | 0 | 0 | 0 | 0 | 1 | 0 | 0 | 0 | 0 | 1 | 1 | 1 |
| Alox15  | 0 | 0 | 0 | 0 | 0 | 1 | 0 | 0 | 0 | 1 | 1 | 1 |
| Amfr    | 0 | 0 | 0 | 0 | 1 | 0 | 0 | 0 | 0 | 1 | 1 | 1 |
| Amot    | 0 | 0 | 0 | 0 | 1 | 0 | 0 | 0 | 0 | 1 | 1 | 1 |
| Ank1    | 0 | 0 | 0 | 0 | 1 | 0 | 0 | 0 | 0 | 1 | 1 | 1 |
| Ank2    | 0 | 0 | 0 | 0 | 1 | 0 | 0 | 0 | 0 | 1 | 1 | 1 |
| Ankdd1b | 0 | 0 | 0 | 0 | 1 | 0 | 0 | 0 | 0 | 1 | 1 | 1 |
| Ankmy1  | 0 | 0 | 0 | 0 | 1 | 0 | 0 | 0 | 0 | 1 | 1 | 1 |
| Ankra2  | 0 | 0 | 0 | 0 | 1 | 0 | 0 | 0 | 0 | 1 | 1 | 1 |
| Ankrd12 | 0 | 0 | 0 | 0 | 1 | 0 | 0 | 0 | 0 | 1 | 1 | 1 |



|          |   |   |   |   |   |   |   |   |   |   |   |   |
|----------|---|---|---|---|---|---|---|---|---|---|---|---|
| Ankrd17  | 0 | 0 | 0 | 0 | 1 | 0 | 0 | 0 | 0 | 1 | 1 | 1 |
| Ankrd23  | 0 | 0 | 0 | 0 | 1 | 0 | 0 | 0 | 0 | 1 | 1 | 1 |
| Ankrd24  | 0 | 0 | 0 | 0 | 1 | 0 | 0 | 0 | 0 | 1 | 1 | 1 |
| Ankrd34a | 0 | 0 | 0 | 0 | 1 | 0 | 0 | 0 | 0 | 1 | 1 | 1 |
| Ankrd34c | 0 | 0 | 0 | 0 | 1 | 0 | 0 | 0 | 0 | 1 | 1 | 1 |
| Ankrd36  | 0 | 0 | 0 | 0 | 1 | 0 | 0 | 0 | 0 | 1 | 1 | 1 |
| Ankrd44  | 0 | 0 | 0 | 0 | 1 | 0 | 0 | 0 | 0 | 1 | 1 | 1 |
| Ankrd6   | 0 | 0 | 0 | 0 | 1 | 0 | 0 | 0 | 0 | 1 | 1 | 1 |
| Anks3    | 0 | 0 | 0 | 0 | 1 | 0 | 0 | 0 | 0 | 1 | 1 | 1 |
| Ankub1   | 0 | 0 | 0 | 0 | 1 | 0 | 0 | 0 | 0 | 1 | 1 | 1 |
| Aoah     | 0 | 0 | 0 | 0 | 1 | 0 | 0 | 0 | 0 | 1 | 1 | 1 |
| Ap1g1    | 0 | 0 | 0 | 0 | 1 | 0 | 0 | 0 | 0 | 1 | 1 | 1 |
| Ap2b1    | 0 | 0 | 0 | 0 | 1 | 0 | 0 | 0 | 0 | 1 | 1 | 1 |
| Ap3m1    | 0 | 0 | 0 | 0 | 1 | 0 | 0 | 0 | 0 | 1 | 1 | 1 |
| Apaf1    | 0 | 0 | 0 | 0 | 1 | 0 | 0 | 0 | 0 | 1 | 1 | 1 |
| Apba1    | 0 | 0 | 0 | 0 | 1 | 0 | 0 | 0 | 0 | 1 | 1 | 1 |
| Apbb2    | 0 | 0 | 0 | 0 | 0 | 0 | 0 | 1 | 0 | 1 | 1 | 1 |
| Apc      | 0 | 0 | 0 | 0 | 1 | 0 | 0 | 0 | 0 | 1 | 1 | 1 |
| Apoa5    | 0 | 0 | 0 | 0 | 0 | 1 | 0 | 0 | 0 | 1 | 1 | 1 |
| Apobr    | 0 | 0 | 0 | 0 | 1 | 0 | 0 | 0 | 0 | 1 | 1 | 1 |
| Apoc4    | 0 | 0 | 0 | 0 | 1 | 0 | 0 | 0 | 0 | 1 | 1 | 1 |
| Appl1    | 0 | 0 | 0 | 0 | 1 | 0 | 0 | 0 | 0 | 1 | 1 | 1 |
| Arhgap12 | 0 | 0 | 0 | 0 | 1 | 0 | 0 | 0 | 0 | 1 | 1 | 1 |
| Arhgap22 | 0 | 0 | 0 | 0 | 1 | 0 | 0 | 0 | 0 | 1 | 1 | 1 |
| Arhgap28 | 0 | 0 | 0 | 0 | 1 | 0 | 0 | 0 | 0 | 1 | 1 | 1 |
| Arhgap29 | 0 | 0 | 0 | 0 | 1 | 0 | 0 | 0 | 0 | 1 | 1 | 1 |
| Arhgap31 | 0 | 0 | 0 | 0 | 1 | 0 | 0 | 0 | 0 | 1 | 1 | 1 |
| Arhgap32 | 0 | 0 | 0 | 0 | 1 | 0 | 0 | 0 | 0 | 1 | 1 | 1 |
| Arhgap42 | 0 | 0 | 0 | 0 | 1 | 0 | 0 | 0 | 0 | 1 | 1 | 1 |
| Arhgdib  | 0 | 0 | 0 | 0 | 1 | 0 | 0 | 0 | 0 | 1 | 1 | 1 |
| Arhgef1  | 0 | 0 | 0 | 0 | 1 | 0 | 0 | 0 | 0 | 1 | 1 | 1 |
| Arhgef10 | 0 | 0 | 0 | 0 | 1 | 0 | 0 | 0 | 0 | 1 | 1 | 1 |
| Arhgef19 | 0 | 0 | 0 | 0 | 1 | 0 | 0 | 0 | 0 | 1 | 1 | 1 |

|          |   |   |   |   |   |   |   |   |   |   |   |   |
|----------|---|---|---|---|---|---|---|---|---|---|---|---|
| Arid1a   | 0 | 0 | 0 | 0 | 1 | 0 | 0 | 0 | 0 | 1 | 1 | 1 |
| Arid2    | 0 | 0 | 0 | 0 | 1 | 0 | 0 | 0 | 0 | 1 | 1 | 1 |
| Arid5b   | 0 | 0 | 0 | 0 | 1 | 0 | 0 | 0 | 0 | 1 | 1 | 1 |
| Arl14    | 0 | 0 | 0 | 0 | 1 | 0 | 0 | 0 | 0 | 1 | 1 | 1 |
| Arl6ip6  | 0 | 0 | 0 | 0 | 1 | 0 | 0 | 0 | 0 | 1 | 1 | 1 |
| Armcx4   | 0 | 0 | 0 | 0 | 1 | 0 | 0 | 0 | 0 | 1 | 1 | 1 |
| Armt1    | 0 | 0 | 0 | 0 | 0 | 1 | 0 | 0 | 0 | 1 | 1 | 1 |
| Arnt2    | 0 | 0 | 0 | 0 | 1 | 0 | 0 | 0 | 0 | 1 | 1 | 1 |
| Arpp21   | 0 | 0 | 0 | 0 | 1 | 0 | 0 | 0 | 0 | 1 | 1 | 1 |
| Asb2     | 0 | 0 | 0 | 0 | 1 | 0 | 0 | 0 | 0 | 1 | 1 | 1 |
| Ash1l    | 0 | 0 | 0 | 0 | 1 | 0 | 0 | 0 | 0 | 1 | 1 | 1 |
| Asic3    | 0 | 0 | 0 | 0 | 1 | 0 | 0 | 0 | 0 | 1 | 1 | 1 |
| Asnsd1   | 0 | 0 | 0 | 0 | 1 | 0 | 0 | 0 | 0 | 1 | 1 | 1 |
| Atf1     | 0 | 0 | 0 | 0 | 1 | 0 | 0 | 0 | 0 | 1 | 1 | 1 |
| Atf2     | 0 | 0 | 0 | 0 | 1 | 0 | 0 | 0 | 0 | 1 | 1 | 1 |
| Atf3     | 0 | 0 | 0 | 0 | 1 | 0 | 0 | 0 | 0 | 1 | 1 | 1 |
| Atg14    | 0 | 0 | 0 | 0 | 1 | 0 | 0 | 0 | 0 | 1 | 1 | 1 |
| Atg2a    | 0 | 0 | 0 | 0 | 1 | 0 | 0 | 0 | 0 | 1 | 1 | 1 |
| Atg9b    | 0 | 0 | 0 | 0 | 1 | 0 | 0 | 0 | 0 | 1 | 1 | 1 |
| Atl2     | 0 | 0 | 0 | 0 | 1 | 0 | 0 | 0 | 0 | 1 | 1 | 1 |
| Atp10a   | 0 | 0 | 0 | 0 | 1 | 0 | 0 | 0 | 0 | 1 | 1 | 1 |
| Atp11b   | 0 | 0 | 0 | 0 | 1 | 0 | 0 | 0 | 0 | 1 | 1 | 1 |
| Atp1b1   | 0 | 0 | 0 | 0 | 1 | 0 | 0 | 0 | 0 | 1 | 1 | 1 |
| Atp1b3   | 0 | 0 | 0 | 0 | 1 | 0 | 0 | 0 | 0 | 1 | 1 | 1 |
| Atp6ap1  | 0 | 0 | 0 | 0 | 1 | 0 | 0 | 0 | 0 | 1 | 1 | 1 |
| Atp6v1b1 | 0 | 0 | 0 | 0 | 1 | 0 | 0 | 0 | 0 | 1 | 1 | 1 |
| Atp6v1h  | 0 | 0 | 0 | 0 | 1 | 0 | 0 | 0 | 0 | 1 | 1 | 1 |
| Atp8a1   | 0 | 0 | 0 | 0 | 1 | 0 | 0 | 0 | 0 | 1 | 1 | 1 |
| Atpaf2   | 0 | 0 | 0 | 0 | 1 | 0 | 0 | 0 | 0 | 1 | 1 | 1 |
| Atxn2    | 0 | 0 | 0 | 0 | 1 | 0 | 0 | 0 | 0 | 1 | 1 | 1 |
| Atxn2l   | 0 | 0 | 0 | 0 | 0 | 0 | 0 | 1 | 0 | 1 | 1 | 1 |
| Atxn7l1  | 0 | 0 | 0 | 0 | 1 | 0 | 0 | 0 | 0 | 1 | 1 | 1 |
| Aup1     | 0 | 0 | 0 | 0 | 1 | 0 | 0 | 0 | 0 | 1 | 1 | 1 |

|          |   |   |   |   |   |   |   |   |   |   |   |   |
|----------|---|---|---|---|---|---|---|---|---|---|---|---|
| Azin2    | 0 | 0 | 0 | 0 | 1 | 0 | 0 | 0 | 0 | 1 | 1 | 1 |
| B3gat3   | 0 | 0 | 0 | 0 | 1 | 0 | 0 | 0 | 0 | 1 | 1 | 1 |
| B4gat1   | 0 | 0 | 0 | 0 | 1 | 0 | 0 | 0 | 0 | 1 | 1 | 1 |
| BC005561 | 0 | 0 | 0 | 0 | 0 | 1 | 0 | 0 | 0 | 1 | 1 | 1 |
| BC027072 | 0 | 0 | 0 | 0 | 1 | 0 | 0 | 0 | 0 | 1 | 1 | 1 |
| BC030867 | 0 | 0 | 0 | 0 | 1 | 0 | 0 | 0 | 0 | 1 | 1 | 1 |
| BC048403 | 0 | 0 | 0 | 0 | 1 | 0 | 0 | 0 | 0 | 1 | 1 | 1 |
| BC048562 | 0 | 0 | 0 | 0 | 0 | 1 | 0 | 0 | 0 | 1 | 1 | 1 |
| Babam1   | 0 | 0 | 0 | 0 | 1 | 0 | 0 | 0 | 0 | 1 | 1 | 1 |
| Bag3     | 0 | 0 | 0 | 0 | 1 | 0 | 0 | 0 | 0 | 1 | 1 | 1 |
| Bag4     | 0 | 0 | 0 | 0 | 0 | 1 | 0 | 0 | 0 | 1 | 1 | 1 |
| Bahcc1   | 0 | 0 | 0 | 0 | 1 | 0 | 0 | 0 | 0 | 1 | 1 | 1 |
| Banp     | 0 | 0 | 0 | 0 | 1 | 0 | 0 | 0 | 0 | 1 | 1 | 1 |
| Bard1    | 0 | 0 | 0 | 0 | 1 | 0 | 0 | 0 | 0 | 1 | 1 | 1 |
| Baz1b    | 0 | 0 | 0 | 0 | 1 | 0 | 0 | 0 | 0 | 1 | 1 | 1 |
| Bbs10    | 0 | 0 | 0 | 0 | 1 | 0 | 0 | 0 | 0 | 1 | 1 | 1 |
| Bbs5     | 1 | 0 | 0 | 0 | 0 | 0 | 0 | 0 | 0 | 1 | 1 | 1 |
| Bcar3    | 0 | 0 | 0 | 0 | 1 | 0 | 0 | 0 | 0 | 1 | 1 | 1 |
| Bcl2l13  | 0 | 0 | 0 | 0 | 1 | 0 | 0 | 0 | 0 | 1 | 1 | 1 |
| Bcl9l    | 0 | 0 | 0 | 0 | 1 | 0 | 0 | 0 | 0 | 1 | 1 | 1 |
| Bclaf1   | 0 | 0 | 0 | 0 | 1 | 0 | 0 | 0 | 0 | 1 | 1 | 1 |
| Bco1     | 0 | 0 | 0 | 0 | 1 | 0 | 0 | 0 | 0 | 1 | 1 | 1 |
| Bcor1l   | 0 | 0 | 0 | 0 | 1 | 0 | 0 | 0 | 0 | 1 | 1 | 1 |
| Bend3    | 0 | 0 | 0 | 0 | 1 | 0 | 0 | 0 | 0 | 1 | 1 | 1 |
| Bicral   | 0 | 0 | 0 | 0 | 1 | 0 | 0 | 0 | 0 | 1 | 1 | 1 |
| Birc6    | 0 | 0 | 0 | 0 | 1 | 0 | 0 | 0 | 0 | 1 | 1 | 1 |
| Blm      | 0 | 0 | 0 | 0 | 1 | 0 | 0 | 0 | 0 | 1 | 1 | 1 |
| Bloc1s1  | 0 | 0 | 0 | 0 | 0 | 1 | 0 | 0 | 0 | 1 | 1 | 1 |
| Blvrb    | 0 | 0 | 0 | 0 | 0 | 1 | 0 | 0 | 0 | 1 | 1 | 1 |
| Bmp2     | 0 | 0 | 0 | 0 | 1 | 0 | 0 | 0 | 0 | 1 | 1 | 1 |
| Bmp4     | 0 | 0 | 0 | 0 | 1 | 0 | 0 | 0 | 0 | 1 | 1 | 1 |
| Bmper    | 0 | 0 | 0 | 0 | 1 | 0 | 0 | 0 | 0 | 1 | 1 | 1 |
| Bmpr2    | 0 | 0 | 0 | 0 | 1 | 0 | 0 | 0 | 0 | 1 | 1 | 1 |

|           |   |   |   |   |   |   |   |   |   |   |   |   |
|-----------|---|---|---|---|---|---|---|---|---|---|---|---|
| Bms1      | 0 | 0 | 0 | 0 | 1 | 0 | 0 | 0 | 0 | 1 | 1 | 1 |
| Bok       | 0 | 0 | 0 | 0 | 1 | 0 | 0 | 0 | 0 | 1 | 1 | 1 |
| Bpifa5    | 0 | 0 | 0 | 0 | 0 | 0 | 0 | 1 | 0 | 1 | 1 | 1 |
| Bpifb1    | 0 | 0 | 0 | 0 | 1 | 0 | 0 | 0 | 0 | 1 | 1 | 1 |
| Brca1     | 0 | 0 | 0 | 0 | 1 | 0 | 0 | 0 | 0 | 1 | 1 | 1 |
| Brd2      | 0 | 0 | 0 | 0 | 1 | 0 | 0 | 0 | 0 | 1 | 1 | 1 |
| Brd8      | 0 | 0 | 0 | 0 | 1 | 0 | 0 | 0 | 0 | 1 | 1 | 1 |
| Brdt      | 0 | 0 | 0 | 0 | 1 | 0 | 0 | 0 | 0 | 1 | 1 | 1 |
| Brf1      | 0 | 0 | 0 | 0 | 0 | 0 | 0 | 1 | 0 | 1 | 1 | 1 |
| Bsn       | 0 | 0 | 0 | 0 | 1 | 0 | 0 | 0 | 0 | 1 | 1 | 1 |
| Bst1      | 0 | 0 | 0 | 0 | 1 | 0 | 0 | 0 | 0 | 1 | 1 | 1 |
| Btbd35f1  | 0 | 0 | 0 | 0 | 1 | 0 | 0 | 0 | 0 | 1 | 1 | 1 |
| Btbd35f7  | 0 | 0 | 0 | 0 | 1 | 0 | 0 | 0 | 0 | 1 | 1 | 1 |
| Bub1b     | 0 | 0 | 0 | 0 | 1 | 0 | 0 | 0 | 0 | 1 | 1 | 1 |
| C1galt1   | 0 | 0 | 0 | 0 | 1 | 0 | 0 | 0 | 0 | 1 | 1 | 1 |
| C1galt1c1 | 0 | 0 | 0 | 0 | 1 | 0 | 0 | 0 | 0 | 1 | 1 | 1 |
| C1rb      | 0 | 0 | 0 | 0 | 1 | 0 | 0 | 0 | 0 | 1 | 1 | 1 |
| C2cd2l    | 0 | 0 | 0 | 0 | 1 | 0 | 0 | 0 | 0 | 1 | 1 | 1 |
| C2cd5     | 0 | 0 | 0 | 0 | 1 | 0 | 0 | 0 | 0 | 1 | 1 | 1 |
| C3        | 0 | 0 | 0 | 0 | 1 | 0 | 0 | 0 | 0 | 1 | 1 | 1 |
| C530008M  | 0 | 0 | 0 | 0 | 0 | 0 | 0 | 1 | 0 | 1 | 1 | 1 |
| C8g       | 0 | 0 | 0 | 0 | 1 | 0 | 0 | 0 | 0 | 1 | 1 | 1 |
| Cab39l    | 0 | 0 | 0 | 0 | 1 | 0 | 0 | 0 | 0 | 1 | 1 | 1 |
| Cacna1a   | 0 | 0 | 0 | 0 | 1 | 0 | 0 | 0 | 0 | 1 | 1 | 1 |
| Cacna2d2  | 0 | 0 | 0 | 0 | 1 | 0 | 0 | 0 | 0 | 1 | 1 | 1 |
| Cacna2d3  | 0 | 0 | 0 | 0 | 1 | 0 | 0 | 0 | 0 | 1 | 1 | 1 |
| Cacul1    | 0 | 0 | 0 | 0 | 1 | 0 | 0 | 0 | 0 | 1 | 1 | 1 |
| Cadm1     | 0 | 0 | 0 | 0 | 1 | 0 | 0 | 0 | 0 | 1 | 1 | 1 |
| Cadps2    | 0 | 0 | 0 | 0 | 0 | 1 | 0 | 0 | 0 | 1 | 1 | 1 |
| Camk1     | 0 | 0 | 0 | 0 | 1 | 0 | 0 | 0 | 0 | 1 | 1 | 1 |
| Camkk2    | 0 | 0 | 0 | 0 | 1 | 0 | 0 | 0 | 0 | 1 | 1 | 1 |
| Capn1     | 0 | 0 | 0 | 0 | 1 | 0 | 0 | 0 | 0 | 1 | 1 | 1 |
| Capn15    | 0 | 0 | 0 | 0 | 1 | 0 | 0 | 0 | 0 | 1 | 1 | 1 |

|          |   |   |   |   |   |   |   |   |   |   |   |   |
|----------|---|---|---|---|---|---|---|---|---|---|---|---|
| Car10    | 0 | 0 | 0 | 0 | 0 | 1 | 0 | 0 | 0 | 1 | 1 | 1 |
| Carnmt1  | 0 | 0 | 0 | 0 | 1 | 0 | 0 | 0 | 0 | 1 | 1 | 1 |
| Cast     | 0 | 0 | 0 | 0 | 1 | 0 | 0 | 0 | 0 | 1 | 1 | 1 |
| Catsper1 | 0 | 0 | 0 | 0 | 1 | 0 | 0 | 0 | 0 | 1 | 1 | 1 |
| Catsper3 | 0 | 0 | 0 | 0 | 1 | 0 | 0 | 0 | 0 | 1 | 1 | 1 |
| Cav1     | 0 | 0 | 0 | 0 | 1 | 0 | 0 | 0 | 0 | 1 | 1 | 1 |
| Cbx8     | 0 | 0 | 0 | 0 | 1 | 0 | 0 | 0 | 0 | 1 | 1 | 1 |
| Cc2d2a   | 0 | 0 | 0 | 0 | 1 | 0 | 0 | 0 | 0 | 1 | 1 | 1 |
| Ccdc127  | 0 | 0 | 0 | 0 | 1 | 0 | 0 | 0 | 0 | 1 | 1 | 1 |
| Ccdc141  | 0 | 0 | 0 | 0 | 1 | 0 | 0 | 0 | 0 | 1 | 1 | 1 |
| Ccdc149  | 0 | 0 | 0 | 0 | 1 | 0 | 0 | 0 | 0 | 1 | 1 | 1 |
| Ccdc150  | 0 | 0 | 0 | 0 | 1 | 0 | 0 | 0 | 0 | 1 | 1 | 1 |
| Ccdc154  | 0 | 0 | 0 | 0 | 1 | 0 | 0 | 0 | 0 | 1 | 1 | 1 |
| Ccdc170  | 0 | 0 | 0 | 0 | 1 | 0 | 0 | 0 | 0 | 1 | 1 | 1 |
| Ccdc190  | 0 | 0 | 0 | 0 | 1 | 0 | 0 | 0 | 0 | 1 | 1 | 1 |
| Ccdc191  | 0 | 0 | 0 | 0 | 1 | 0 | 0 | 0 | 0 | 1 | 1 | 1 |
| Ccdc27   | 0 | 0 | 0 | 0 | 1 | 0 | 0 | 0 | 0 | 1 | 1 | 1 |
| Ccdc33   | 0 | 0 | 0 | 0 | 1 | 0 | 0 | 0 | 0 | 1 | 1 | 1 |
| Ccdc40   | 0 | 0 | 0 | 0 | 0 | 0 | 0 | 1 | 0 | 1 | 1 | 1 |
| Ccdc8    | 0 | 0 | 0 | 0 | 1 | 0 | 0 | 0 | 0 | 1 | 1 | 1 |
| Ccdc88b  | 0 | 0 | 0 | 0 | 1 | 0 | 0 | 0 | 0 | 1 | 1 | 1 |
| Ccdc88c  | 0 | 0 | 0 | 0 | 1 | 0 | 0 | 0 | 0 | 1 | 1 | 1 |
| Ccdc96   | 0 | 0 | 0 | 0 | 1 | 0 | 0 | 0 | 0 | 1 | 1 | 1 |
| Ccnj     | 0 | 0 | 0 | 0 | 1 | 0 | 0 | 0 | 0 | 1 | 1 | 1 |
| Cct5     | 0 | 0 | 0 | 0 | 1 | 0 | 0 | 0 | 0 | 1 | 1 | 1 |
| Cct8     | 0 | 0 | 0 | 0 | 0 | 0 | 0 | 1 | 0 | 1 | 1 | 1 |
| Cd101    | 0 | 0 | 0 | 0 | 1 | 0 | 0 | 0 | 0 | 1 | 1 | 1 |
| Cd163    | 0 | 0 | 0 | 0 | 1 | 0 | 0 | 0 | 0 | 1 | 1 | 1 |
| Cd200r3  | 0 | 0 | 0 | 0 | 1 | 0 | 0 | 0 | 0 | 1 | 1 | 1 |
| Cd300c   | 0 | 0 | 0 | 0 | 1 | 0 | 0 | 0 | 0 | 1 | 1 | 1 |
| Cd300e   | 0 | 0 | 0 | 0 | 1 | 0 | 0 | 0 | 0 | 1 | 1 | 1 |
| Cd300lb  | 0 | 0 | 0 | 0 | 1 | 0 | 0 | 0 | 0 | 1 | 1 | 1 |
| Cd36     | 0 | 0 | 0 | 0 | 1 | 0 | 0 | 0 | 0 | 1 | 1 | 1 |

|          |   |   |   |   |   |   |   |   |   |   |   |   |
|----------|---|---|---|---|---|---|---|---|---|---|---|---|
| Cd40     | 0 | 0 | 0 | 0 | 1 | 0 | 0 | 0 | 0 | 1 | 1 | 1 |
| Cd7      | 0 | 0 | 0 | 0 | 1 | 0 | 0 | 0 | 0 | 1 | 1 | 1 |
| Cd80     | 0 | 0 | 0 | 0 | 1 | 0 | 0 | 0 | 0 | 1 | 1 | 1 |
| Cdc37    | 0 | 0 | 0 | 0 | 1 | 0 | 0 | 0 | 0 | 1 | 1 | 1 |
| Cdc42bpb | 0 | 0 | 0 | 0 | 1 | 0 | 0 | 0 | 0 | 1 | 1 | 1 |
| Cdca2    | 0 | 0 | 0 | 0 | 1 | 0 | 0 | 0 | 0 | 1 | 1 | 1 |
| Cdh13    | 0 | 0 | 0 | 0 | 1 | 0 | 0 | 0 | 0 | 1 | 1 | 1 |
| Cdh19    | 0 | 0 | 0 | 0 | 1 | 0 | 0 | 0 | 0 | 1 | 1 | 1 |
| Cdh2     | 0 | 0 | 0 | 0 | 0 | 1 | 0 | 0 | 0 | 1 | 1 | 1 |
| Cdh3     | 0 | 0 | 0 | 0 | 1 | 0 | 0 | 0 | 0 | 1 | 1 | 1 |
| Cdk12    | 0 | 0 | 0 | 0 | 1 | 0 | 0 | 0 | 0 | 1 | 1 | 1 |
| Cdkn2aip | 0 | 0 | 0 | 0 | 1 | 0 | 0 | 0 | 0 | 1 | 1 | 1 |
| Cdkn2c   | 0 | 0 | 0 | 0 | 1 | 0 | 0 | 0 | 0 | 1 | 1 | 1 |
| Cdr2     | 0 | 0 | 0 | 0 | 1 | 0 | 0 | 0 | 0 | 1 | 1 | 1 |
| Cdv3     | 0 | 0 | 0 | 0 | 1 | 0 | 0 | 0 | 0 | 1 | 1 | 1 |
| Cdyl     | 0 | 0 | 0 | 0 | 1 | 0 | 0 | 0 | 0 | 1 | 1 | 1 |
| Ceacam18 | 0 | 0 | 0 | 0 | 1 | 0 | 0 | 0 | 0 | 1 | 1 | 1 |
| Celsr3   | 0 | 0 | 0 | 0 | 1 | 0 | 0 | 0 | 0 | 1 | 1 | 1 |
| Cenpf    | 0 | 0 | 0 | 0 | 1 | 0 | 0 | 0 | 0 | 1 | 1 | 1 |
| Cep112   | 0 | 0 | 0 | 0 | 1 | 0 | 0 | 0 | 0 | 1 | 1 | 1 |
| Cep170   | 0 | 0 | 0 | 0 | 1 | 0 | 0 | 0 | 0 | 1 | 1 | 1 |
| Cep192   | 0 | 0 | 0 | 0 | 1 | 0 | 0 | 0 | 0 | 1 | 1 | 1 |
| Cep250   | 0 | 0 | 0 | 0 | 1 | 0 | 0 | 0 | 0 | 1 | 1 | 1 |
| Cep290   | 0 | 0 | 0 | 0 | 1 | 0 | 0 | 0 | 0 | 1 | 1 | 1 |
| Cep350   | 0 | 0 | 0 | 0 | 1 | 0 | 0 | 0 | 0 | 1 | 1 | 1 |
| Cep70    | 0 | 0 | 0 | 0 | 1 | 0 | 0 | 0 | 0 | 1 | 1 | 1 |
| Cep97    | 0 | 0 | 0 | 0 | 1 | 0 | 0 | 0 | 0 | 1 | 1 | 1 |
| Cers1    | 0 | 0 | 0 | 0 | 0 | 0 | 0 | 1 | 0 | 1 | 1 | 1 |
| Cers2    | 0 | 0 | 0 | 0 | 1 | 0 | 0 | 0 | 0 | 1 | 1 | 1 |
| Ces1b    | 0 | 0 | 0 | 0 | 1 | 0 | 0 | 0 | 0 | 1 | 1 | 1 |
| Ces2c    | 0 | 0 | 0 | 0 | 1 | 0 | 0 | 0 | 0 | 1 | 1 | 1 |
| Ces2e    | 0 | 0 | 0 | 0 | 0 | 1 | 0 | 0 | 0 | 1 | 1 | 1 |
| Cetn2    | 0 | 0 | 0 | 0 | 0 | 0 | 0 | 1 | 0 | 1 | 1 | 1 |

|        |   |   |   |   |   |   |   |   |   |   |   |   |
|--------|---|---|---|---|---|---|---|---|---|---|---|---|
| Cetn3  | 0 | 0 | 0 | 0 | 1 | 0 | 0 | 0 | 0 | 1 | 1 | 1 |
| Cfap46 | 0 | 0 | 0 | 0 | 1 | 0 | 0 | 0 | 0 | 1 | 1 | 1 |
| Cfh    | 0 | 0 | 0 | 0 | 0 | 1 | 0 | 0 | 0 | 1 | 1 | 1 |
| Cfhr1  | 0 | 0 | 0 | 0 | 1 | 0 | 0 | 0 | 0 | 1 | 1 | 1 |
| Cgn    | 0 | 0 | 0 | 0 | 1 | 0 | 0 | 0 | 0 | 1 | 1 | 1 |
| Cgnl1  | 0 | 0 | 0 | 0 | 1 | 0 | 0 | 0 | 0 | 1 | 1 | 1 |
| Ch25h  | 0 | 0 | 0 | 0 | 1 | 0 | 0 | 0 | 0 | 1 | 1 | 1 |
| Champ1 | 0 | 0 | 0 | 0 | 1 | 0 | 0 | 0 | 0 | 1 | 1 | 1 |
| Chd1l  | 0 | 0 | 0 | 0 | 1 | 0 | 0 | 0 | 0 | 1 | 1 | 1 |
| Chd4   | 0 | 0 | 0 | 0 | 1 | 0 | 0 | 0 | 0 | 1 | 1 | 1 |
| Chd6   | 0 | 0 | 0 | 0 | 1 | 0 | 0 | 0 | 0 | 1 | 1 | 1 |
| Chd9   | 0 | 0 | 0 | 0 | 1 | 0 | 0 | 0 | 0 | 1 | 1 | 1 |
| Chia1  | 0 | 0 | 0 | 0 | 1 | 0 | 0 | 0 | 0 | 1 | 1 | 1 |
| Chmp1a | 0 | 0 | 0 | 0 | 1 | 0 | 0 | 0 | 0 | 1 | 1 | 1 |
| Chst12 | 0 | 0 | 0 | 0 | 1 | 0 | 0 | 0 | 0 | 1 | 1 | 1 |
| Chst2  | 0 | 0 | 0 | 0 | 1 | 0 | 0 | 0 | 0 | 1 | 1 | 1 |
| Chsy3  | 0 | 0 | 0 | 0 | 1 | 0 | 0 | 0 | 0 | 1 | 1 | 1 |
| Cited2 | 0 | 0 | 0 | 0 | 1 | 0 | 0 | 0 | 0 | 1 | 1 | 1 |
| Ckmt2  | 0 | 0 | 0 | 0 | 1 | 0 | 0 | 0 | 0 | 1 | 1 | 1 |
| Clasp2 | 0 | 0 | 0 | 0 | 0 | 0 | 0 | 1 | 0 | 1 | 1 | 1 |
| Clca3b | 0 | 0 | 0 | 0 | 0 | 1 | 0 | 0 | 0 | 1 | 1 | 1 |
| Clca4b | 0 | 0 | 0 | 0 | 1 | 0 | 0 | 0 | 0 | 1 | 1 | 1 |
| Clic1  | 0 | 0 | 0 | 0 | 1 | 0 | 0 | 0 | 0 | 1 | 1 | 1 |
| Clmn   | 0 | 0 | 0 | 0 | 1 | 0 | 0 | 0 | 0 | 1 | 1 | 1 |
| Clmp   | 0 | 0 | 0 | 0 | 1 | 0 | 0 | 0 | 0 | 1 | 1 | 1 |
| Clns1a | 0 | 0 | 0 | 0 | 1 | 0 | 0 | 0 | 0 | 1 | 1 | 1 |
| Clpb   | 0 | 0 | 0 | 0 | 1 | 0 | 0 | 0 | 0 | 1 | 1 | 1 |
| Clstn3 | 0 | 0 | 0 | 0 | 1 | 0 | 0 | 0 | 0 | 1 | 1 | 1 |
| Cltc   | 0 | 0 | 0 | 0 | 1 | 0 | 0 | 0 | 0 | 1 | 1 | 1 |
| Cluh   | 0 | 0 | 0 | 0 | 1 | 0 | 0 | 0 | 0 | 1 | 1 | 1 |
| Cndp2  | 0 | 0 | 0 | 0 | 1 | 0 | 0 | 0 | 0 | 1 | 1 | 1 |
| Cnga4  | 0 | 0 | 0 | 0 | 1 | 0 | 0 | 0 | 0 | 1 | 1 | 1 |
| Cnksr1 | 0 | 0 | 0 | 0 | 1 | 0 | 0 | 0 | 0 | 1 | 1 | 1 |

|          |   |   |   |   |   |   |   |   |   |   |   |   |
|----------|---|---|---|---|---|---|---|---|---|---|---|---|
| Cnn3     | 0 | 0 | 0 | 0 | 1 | 0 | 0 | 0 | 0 | 1 | 1 | 1 |
| Cntn6    | 0 | 0 | 0 | 0 | 1 | 0 | 0 | 0 | 0 | 1 | 1 | 1 |
| Cntnap4  | 0 | 0 | 0 | 0 | 0 | 0 | 0 | 1 | 0 | 1 | 1 | 1 |
| Cntnap5c | 0 | 0 | 0 | 0 | 1 | 0 | 0 | 0 | 0 | 1 | 1 | 1 |
| Cntrl    | 0 | 0 | 0 | 0 | 1 | 0 | 0 | 0 | 0 | 1 | 1 | 1 |
| Cog1     | 0 | 0 | 0 | 0 | 1 | 0 | 0 | 0 | 0 | 1 | 1 | 1 |
| Cog2     | 0 | 0 | 0 | 0 | 0 | 0 | 0 | 1 | 0 | 1 | 1 | 1 |
| Cog3     | 0 | 0 | 0 | 0 | 0 | 1 | 0 | 0 | 0 | 1 | 1 | 1 |
| Cog4     | 0 | 0 | 0 | 0 | 1 | 0 | 0 | 0 | 0 | 1 | 1 | 1 |
| Cog5     | 0 | 0 | 0 | 0 | 1 | 0 | 0 | 0 | 0 | 1 | 1 | 1 |
| Col11a1  | 0 | 0 | 0 | 0 | 1 | 0 | 0 | 0 | 0 | 1 | 1 | 1 |
| Col11a2  | 0 | 0 | 0 | 0 | 1 | 0 | 0 | 0 | 0 | 1 | 1 | 1 |
| Col13a1  | 0 | 0 | 0 | 0 | 1 | 0 | 0 | 0 | 0 | 1 | 1 | 1 |
| Col14a1  | 0 | 0 | 0 | 0 | 1 | 0 | 0 | 0 | 0 | 1 | 1 | 1 |
| Col18a1  | 0 | 0 | 0 | 0 | 1 | 0 | 0 | 0 | 0 | 1 | 1 | 1 |
| Col1a1   | 0 | 0 | 0 | 0 | 1 | 0 | 0 | 0 | 0 | 1 | 1 | 1 |
| Col1a2   | 0 | 0 | 0 | 0 | 1 | 0 | 0 | 0 | 0 | 1 | 1 | 1 |
| Col25a1  | 0 | 0 | 0 | 0 | 1 | 0 | 0 | 0 | 0 | 1 | 1 | 1 |
| Col27a1  | 0 | 0 | 0 | 0 | 1 | 0 | 0 | 0 | 0 | 1 | 1 | 1 |
| Col28a1  | 0 | 0 | 0 | 0 | 1 | 0 | 0 | 0 | 0 | 1 | 1 | 1 |
| Col2a1   | 0 | 0 | 0 | 0 | 1 | 0 | 0 | 0 | 0 | 1 | 1 | 1 |
| Col4a2   | 0 | 0 | 0 | 0 | 1 | 0 | 0 | 0 | 0 | 1 | 1 | 1 |
| Col5a3   | 0 | 0 | 0 | 0 | 1 | 0 | 0 | 0 | 0 | 1 | 1 | 1 |
| Col6a2   | 0 | 0 | 0 | 0 | 1 | 0 | 0 | 0 | 0 | 1 | 1 | 1 |
| Col7a1   | 0 | 0 | 0 | 0 | 0 | 0 | 0 | 1 | 0 | 1 | 1 | 1 |
| Col9a2   | 0 | 0 | 0 | 0 | 1 | 0 | 0 | 0 | 0 | 1 | 1 | 1 |
| Colec10  | 0 | 0 | 0 | 0 | 1 | 0 | 0 | 0 | 0 | 1 | 1 | 1 |
| Colec11  | 0 | 0 | 0 | 0 | 0 | 0 | 0 | 1 | 0 | 1 | 1 | 1 |
| Copa     | 0 | 0 | 0 | 0 | 1 | 0 | 0 | 0 | 0 | 1 | 1 | 1 |
| Coro2b   | 0 | 0 | 0 | 0 | 1 | 0 | 0 | 0 | 0 | 1 | 1 | 1 |
| Cox14    | 0 | 0 | 0 | 0 | 1 | 0 | 0 | 0 | 0 | 1 | 1 | 1 |
| Cox18    | 0 | 0 | 0 | 0 | 0 | 0 | 0 | 1 | 0 | 1 | 1 | 1 |
| Cox7c    | 0 | 0 | 0 | 0 | 0 | 0 | 0 | 1 | 0 | 1 | 1 | 1 |



|           |   |   |   |   |   |   |   |   |   |   |   |   |
|-----------|---|---|---|---|---|---|---|---|---|---|---|---|
| Cp        | 0 | 0 | 0 | 0 | 1 | 0 | 0 | 0 | 0 | 1 | 1 | 1 |
| Cped1     | 0 | 0 | 0 | 0 | 0 | 1 | 0 | 0 | 0 | 1 | 1 | 1 |
| Cpt1a     | 0 | 0 | 0 | 0 | 1 | 0 | 0 | 0 | 0 | 1 | 1 | 1 |
| Cpt1b     | 0 | 0 | 0 | 0 | 1 | 0 | 0 | 0 | 0 | 1 | 1 | 1 |
| Cpt1c     | 0 | 0 | 0 | 0 | 1 | 0 | 0 | 0 | 0 | 1 | 1 | 1 |
| Cramp1l   | 0 | 0 | 0 | 0 | 1 | 0 | 0 | 0 | 0 | 1 | 1 | 1 |
| Crb2      | 0 | 0 | 0 | 0 | 1 | 0 | 0 | 0 | 0 | 1 | 1 | 1 |
| Crot      | 0 | 0 | 0 | 0 | 1 | 0 | 0 | 0 | 0 | 1 | 1 | 1 |
| Crtac1    | 0 | 0 | 0 | 0 | 1 | 0 | 0 | 0 | 0 | 1 | 1 | 1 |
| Cry1      | 0 | 0 | 0 | 0 | 1 | 0 | 0 | 0 | 0 | 1 | 1 | 1 |
| Crybb1    | 0 | 0 | 0 | 0 | 1 | 0 | 0 | 0 | 0 | 1 | 1 | 1 |
| Crygd     | 0 | 0 | 0 | 0 | 1 | 0 | 0 | 0 | 0 | 1 | 1 | 1 |
| Csf3r     | 0 | 0 | 0 | 0 | 0 | 1 | 0 | 0 | 0 | 1 | 1 | 1 |
| Csmd2     | 0 | 0 | 0 | 0 | 1 | 0 | 0 | 0 | 0 | 1 | 1 | 1 |
| Csnk1e    | 0 | 0 | 0 | 0 | 1 | 0 | 0 | 0 | 0 | 1 | 1 | 1 |
| Cst10     | 0 | 0 | 0 | 0 | 1 | 0 | 0 | 0 | 0 | 1 | 1 | 1 |
| Ctbp1     | 0 | 0 | 0 | 0 | 1 | 0 | 0 | 0 | 0 | 1 | 1 | 1 |
| Ctc1      | 0 | 0 | 0 | 0 | 1 | 0 | 0 | 0 | 0 | 1 | 1 | 1 |
| Ctdspl2   | 0 | 0 | 0 | 0 | 1 | 0 | 0 | 0 | 0 | 1 | 1 | 1 |
| Ctr9      | 0 | 0 | 0 | 0 | 1 | 0 | 0 | 0 | 0 | 1 | 1 | 1 |
| Cts6      | 0 | 0 | 0 | 0 | 0 | 1 | 0 | 0 | 0 | 1 | 1 | 1 |
| Cts7      | 0 | 0 | 0 | 0 | 1 | 0 | 0 | 0 | 0 | 1 | 1 | 1 |
| Cts8      | 0 | 0 | 0 | 0 | 1 | 0 | 0 | 0 | 0 | 1 | 1 | 1 |
| Ctsa      | 0 | 0 | 0 | 0 | 1 | 0 | 0 | 0 | 0 | 1 | 1 | 1 |
| Cttnbp2   | 0 | 0 | 0 | 0 | 1 | 0 | 0 | 0 | 0 | 1 | 1 | 1 |
| Cttnbp2nl | 0 | 0 | 0 | 0 | 1 | 0 | 0 | 0 | 0 | 1 | 1 | 1 |
| Cul1      | 0 | 0 | 0 | 0 | 1 | 0 | 0 | 0 | 0 | 1 | 1 | 1 |
| Cul7      | 0 | 0 | 0 | 0 | 1 | 0 | 0 | 0 | 0 | 1 | 1 | 1 |
| Cul9      | 0 | 0 | 0 | 0 | 1 | 0 | 0 | 0 | 0 | 1 | 1 | 1 |
| Cwc22     | 0 | 0 | 0 | 0 | 1 | 0 | 0 | 0 | 0 | 1 | 1 | 1 |
| Cxcl1     | 0 | 0 | 0 | 0 | 1 | 0 | 0 | 0 | 0 | 1 | 1 | 1 |
| Cyb5r4    | 0 | 0 | 0 | 0 | 1 | 0 | 0 | 0 | 0 | 1 | 1 | 1 |
| Cylc2     | 0 | 0 | 0 | 0 | 1 | 0 | 0 | 0 | 0 | 1 | 1 | 1 |

|           |   |   |   |   |   |   |   |   |   |   |   |   |
|-----------|---|---|---|---|---|---|---|---|---|---|---|---|
| Cyp26b1   | 0 | 0 | 0 | 0 | 1 | 0 | 0 | 0 | 0 | 1 | 1 | 1 |
| Cyp2a4    | 0 | 0 | 0 | 0 | 1 | 0 | 0 | 0 | 0 | 1 | 1 | 1 |
| Cyp2c68   | 0 | 0 | 0 | 0 | 1 | 0 | 0 | 0 | 0 | 1 | 1 | 1 |
| Cyp2d9    | 0 | 0 | 0 | 0 | 1 | 0 | 0 | 0 | 0 | 1 | 1 | 1 |
| Cyp2e1    | 0 | 0 | 0 | 0 | 0 | 0 | 0 | 1 | 0 | 1 | 1 | 1 |
| Cyp2j7    | 0 | 0 | 0 | 0 | 1 | 0 | 0 | 0 | 0 | 1 | 1 | 1 |
| Cyp2r1    | 0 | 0 | 0 | 0 | 1 | 0 | 0 | 0 | 0 | 1 | 1 | 1 |
| Cyp3a59   | 0 | 0 | 0 | 0 | 1 | 0 | 0 | 0 | 0 | 1 | 1 | 1 |
| Cyp51     | 0 | 0 | 0 | 0 | 1 | 0 | 0 | 0 | 0 | 1 | 1 | 1 |
| D11Wsu47  | 0 | 0 | 0 | 0 | 1 | 0 | 0 | 0 | 0 | 1 | 1 | 1 |
| D17Wsu92  | 0 | 0 | 0 | 0 | 1 | 0 | 0 | 0 | 0 | 1 | 1 | 1 |
| D1Pas1    | 0 | 0 | 0 | 0 | 1 | 0 | 0 | 0 | 0 | 1 | 1 | 1 |
| D430042O  | 0 | 0 | 0 | 0 | 1 | 0 | 0 | 0 | 0 | 1 | 1 | 1 |
| D5Ertd579 | 0 | 0 | 0 | 0 | 1 | 0 | 0 | 0 | 0 | 1 | 1 | 1 |
| D6Wsu163  | 0 | 0 | 0 | 0 | 1 | 0 | 0 | 0 | 0 | 1 | 1 | 1 |
| Dab2      | 0 | 0 | 0 | 0 | 1 | 0 | 0 | 0 | 0 | 1 | 1 | 1 |
| Dagla     | 0 | 0 | 0 | 0 | 1 | 0 | 0 | 0 | 0 | 1 | 1 | 1 |
| Daglb     | 0 | 0 | 0 | 0 | 1 | 0 | 0 | 0 | 0 | 1 | 1 | 1 |
| Dcaf5     | 0 | 0 | 0 | 0 | 1 | 0 | 0 | 0 | 0 | 1 | 1 | 1 |
| Dcaf8     | 0 | 0 | 0 | 0 | 1 | 0 | 0 | 0 | 0 | 1 | 1 | 1 |
| Dcbld2    | 0 | 0 | 0 | 0 | 1 | 0 | 0 | 0 | 0 | 1 | 1 | 1 |
| Dcp1a     | 0 | 0 | 0 | 0 | 1 | 0 | 0 | 0 | 0 | 1 | 1 | 1 |
| Dcp2      | 0 | 0 | 0 | 0 | 1 | 0 | 0 | 0 | 0 | 1 | 1 | 1 |
| Dct       | 0 | 0 | 0 | 0 | 1 | 0 | 0 | 0 | 0 | 1 | 1 | 1 |
| Dcun1d4   | 0 | 0 | 0 | 0 | 1 | 0 | 0 | 0 | 0 | 1 | 1 | 1 |
| Ddx1      | 0 | 0 | 0 | 0 | 1 | 0 | 0 | 0 | 0 | 1 | 1 | 1 |
| Ddx50     | 0 | 0 | 0 | 0 | 1 | 0 | 0 | 0 | 0 | 1 | 1 | 1 |
| Ddx51     | 0 | 0 | 0 | 0 | 0 | 0 | 0 | 1 | 0 | 1 | 1 | 1 |
| Ddx56     | 0 | 0 | 0 | 0 | 1 | 0 | 0 | 0 | 0 | 1 | 1 | 1 |
| Defa21    | 0 | 0 | 0 | 0 | 1 | 0 | 0 | 0 | 0 | 1 | 1 | 1 |
| Defa30    | 0 | 0 | 0 | 0 | 1 | 0 | 0 | 0 | 0 | 1 | 1 | 1 |
| Dennd1a   | 0 | 0 | 0 | 0 | 1 | 0 | 0 | 0 | 0 | 1 | 1 | 1 |
| Dennd1c   | 0 | 0 | 0 | 0 | 1 | 0 | 0 | 0 | 0 | 1 | 1 | 1 |

|         |   |   |   |   |   |   |   |   |   |   |   |   |
|---------|---|---|---|---|---|---|---|---|---|---|---|---|
| Dennd5a | 0 | 0 | 0 | 0 | 1 | 0 | 0 | 0 | 0 | 1 | 1 | 1 |
| Depdc5  | 0 | 0 | 0 | 0 | 1 | 0 | 0 | 0 | 0 | 1 | 1 | 1 |
| Dgkb    | 0 | 0 | 0 | 0 | 1 | 0 | 0 | 0 | 0 | 1 | 1 | 1 |
| Dgkg    | 0 | 0 | 0 | 0 | 1 | 0 | 0 | 0 | 0 | 1 | 1 | 1 |
| Dhdds   | 0 | 0 | 0 | 0 | 1 | 0 | 0 | 0 | 0 | 1 | 1 | 1 |
| Dhx38   | 0 | 0 | 0 | 0 | 1 | 0 | 0 | 0 | 0 | 1 | 1 | 1 |
| Diaph3  | 0 | 0 | 0 | 0 | 1 | 0 | 0 | 0 | 0 | 1 | 1 | 1 |
| Dido1   | 0 | 0 | 0 | 0 | 1 | 0 | 0 | 0 | 0 | 1 | 1 | 1 |
| Dis3    | 0 | 0 | 0 | 0 | 1 | 0 | 0 | 0 | 0 | 1 | 1 | 1 |
| Dixdc1  | 0 | 0 | 0 | 0 | 1 | 0 | 0 | 0 | 0 | 1 | 1 | 1 |
| Dkc1    | 0 | 0 | 0 | 0 | 1 | 0 | 0 | 0 | 0 | 1 | 1 | 1 |
| Dkk2    | 0 | 0 | 0 | 0 | 1 | 0 | 0 | 0 | 0 | 1 | 1 | 1 |
| Dlat    | 0 | 0 | 0 | 0 | 1 | 0 | 0 | 0 | 0 | 1 | 1 | 1 |
| Dld     | 0 | 0 | 0 | 0 | 1 | 0 | 0 | 0 | 0 | 1 | 1 | 1 |
| Dlg2    | 0 | 0 | 0 | 0 | 1 | 0 | 0 | 0 | 0 | 1 | 1 | 1 |
| Dlgap1  | 0 | 0 | 0 | 0 | 1 | 0 | 0 | 0 | 0 | 1 | 1 | 1 |
| Dlgap2  | 0 | 0 | 0 | 0 | 1 | 0 | 0 | 0 | 0 | 1 | 1 | 1 |
| Dmbt1   | 0 | 0 | 0 | 0 | 1 | 0 | 0 | 0 | 0 | 1 | 1 | 1 |
| Dmgdh   | 0 | 0 | 0 | 0 | 1 | 0 | 0 | 0 | 0 | 1 | 1 | 1 |
| Dmrt2   | 0 | 0 | 0 | 0 | 1 | 0 | 0 | 0 | 0 | 1 | 1 | 1 |
| Dmrt3   | 0 | 0 | 0 | 0 | 1 | 0 | 0 | 0 | 0 | 1 | 1 | 1 |
| Dmxl1   | 0 | 0 | 0 | 0 | 1 | 0 | 0 | 0 | 0 | 1 | 1 | 1 |
| Dmxl2   | 0 | 0 | 0 | 0 | 1 | 0 | 0 | 0 | 0 | 1 | 1 | 1 |
| Dnaaf3  | 0 | 0 | 0 | 0 | 1 | 0 | 0 | 0 | 0 | 1 | 1 | 1 |
| Dnah6   | 0 | 0 | 0 | 0 | 1 | 0 | 0 | 0 | 0 | 1 | 1 | 1 |
| Dnajc13 | 0 | 0 | 0 | 0 | 1 | 0 | 0 | 0 | 0 | 1 | 1 | 1 |
| Dnajc21 | 0 | 0 | 0 | 0 | 0 | 0 | 0 | 1 | 0 | 1 | 1 | 1 |
| Dnajc4  | 0 | 0 | 0 | 0 | 1 | 0 | 0 | 0 | 0 | 1 | 1 | 1 |
| Dnajc6  | 0 | 0 | 0 | 0 | 1 | 0 | 0 | 0 | 0 | 1 | 1 | 1 |
| Dnase2b | 0 | 0 | 0 | 0 | 1 | 0 | 0 | 0 | 0 | 1 | 1 | 1 |
| Dnm3    | 0 | 0 | 0 | 0 | 1 | 0 | 0 | 0 | 0 | 1 | 1 | 1 |
| Dnmt3a  | 0 | 0 | 0 | 0 | 1 | 0 | 0 | 0 | 0 | 1 | 1 | 1 |
| Dock1   | 0 | 0 | 0 | 0 | 1 | 0 | 0 | 0 | 0 | 1 | 1 | 1 |

|           |   |   |   |   |   |   |   |   |   |   |   |   |
|-----------|---|---|---|---|---|---|---|---|---|---|---|---|
| Dock10    | 0 | 0 | 0 | 0 | 1 | 0 | 0 | 0 | 0 | 1 | 1 | 1 |
| Dock6     | 0 | 0 | 0 | 0 | 1 | 0 | 0 | 0 | 0 | 1 | 1 | 1 |
| Dock8     | 0 | 0 | 0 | 0 | 1 | 0 | 0 | 0 | 0 | 1 | 1 | 1 |
| Dok6      | 0 | 0 | 0 | 0 | 1 | 0 | 0 | 0 | 0 | 1 | 1 | 1 |
| Dpp6      | 0 | 0 | 0 | 0 | 1 | 0 | 0 | 0 | 0 | 1 | 1 | 1 |
| Dppa2     | 0 | 0 | 0 | 0 | 1 | 0 | 0 | 0 | 0 | 1 | 1 | 1 |
| Dppa5a    | 0 | 0 | 0 | 0 | 1 | 0 | 0 | 0 | 0 | 1 | 1 | 1 |
| Dpy19l1   | 0 | 0 | 0 | 0 | 1 | 0 | 0 | 0 | 0 | 1 | 1 | 1 |
| Dpy19l4   | 0 | 0 | 0 | 0 | 1 | 0 | 0 | 0 | 0 | 1 | 1 | 1 |
| Dpysl3    | 0 | 0 | 0 | 0 | 1 | 0 | 0 | 0 | 0 | 1 | 1 | 1 |
| Drc7      | 0 | 0 | 0 | 0 | 1 | 0 | 0 | 0 | 0 | 1 | 1 | 1 |
| Dsc3      | 0 | 0 | 0 | 0 | 1 | 0 | 0 | 0 | 0 | 1 | 1 | 1 |
| Dscc1     | 0 | 0 | 0 | 0 | 1 | 0 | 0 | 0 | 0 | 1 | 1 | 1 |
| Dsg1a     | 0 | 0 | 0 | 0 | 1 | 0 | 0 | 0 | 0 | 1 | 1 | 1 |
| Dsg1b     | 0 | 0 | 0 | 0 | 1 | 0 | 0 | 0 | 0 | 1 | 1 | 1 |
| Dtna      | 0 | 0 | 0 | 0 | 0 | 0 | 0 | 1 | 0 | 1 | 1 | 1 |
| Dvl1      | 0 | 0 | 0 | 0 | 1 | 0 | 0 | 0 | 0 | 1 | 1 | 1 |
| Dync1li2  | 0 | 0 | 0 | 0 | 1 | 0 | 0 | 0 | 0 | 1 | 1 | 1 |
| Dync2h1   | 0 | 0 | 0 | 0 | 1 | 0 | 0 | 0 | 0 | 1 | 1 | 1 |
| Dynlrb1   | 0 | 0 | 0 | 0 | 1 | 0 | 0 | 0 | 0 | 1 | 1 | 1 |
| Dysf      | 0 | 0 | 0 | 0 | 0 | 1 | 0 | 0 | 0 | 1 | 1 | 1 |
| Dzip3     | 0 | 0 | 0 | 0 | 1 | 0 | 0 | 0 | 0 | 1 | 1 | 1 |
| E130308A1 | 0 | 0 | 0 | 0 | 1 | 0 | 0 | 0 | 0 | 1 | 1 | 1 |
| E330034G1 | 0 | 0 | 0 | 0 | 0 | 1 | 0 | 0 | 0 | 1 | 1 | 1 |
| Ebag9     | 0 | 0 | 0 | 0 | 1 | 0 | 0 | 0 | 0 | 1 | 1 | 1 |
| Ebf1      | 0 | 0 | 0 | 0 | 1 | 0 | 0 | 0 | 0 | 1 | 1 | 1 |
| Ebna1bp2  | 0 | 0 | 0 | 0 | 1 | 0 | 0 | 0 | 0 | 1 | 1 | 1 |
| Ebpl      | 0 | 0 | 0 | 0 | 1 | 0 | 0 | 0 | 0 | 1 | 1 | 1 |
| Ecel1     | 0 | 0 | 0 | 0 | 1 | 0 | 0 | 0 | 0 | 1 | 1 | 1 |
| Echdc1    | 0 | 0 | 0 | 0 | 1 | 0 | 0 | 0 | 0 | 1 | 1 | 1 |
| Ecm1      | 0 | 0 | 0 | 0 | 1 | 0 | 0 | 0 | 0 | 1 | 1 | 1 |
| Ecm2      | 0 | 0 | 0 | 0 | 1 | 0 | 0 | 0 | 0 | 1 | 1 | 1 |
| Edar      | 0 | 0 | 0 | 0 | 1 | 0 | 0 | 0 | 0 | 1 | 1 | 1 |

|           |   |   |   |   |   |   |   |   |   |   |   |   |
|-----------|---|---|---|---|---|---|---|---|---|---|---|---|
| Eea1      | 0 | 0 | 0 | 0 | 0 | 0 | 0 | 1 | 0 | 1 | 1 | 1 |
| Eef1a1    | 0 | 0 | 0 | 0 | 0 | 0 | 0 | 1 | 0 | 1 | 1 | 1 |
| Eef2      | 0 | 0 | 0 | 0 | 1 | 0 | 0 | 0 | 0 | 1 | 1 | 1 |
| Efcab14   | 0 | 0 | 0 | 0 | 1 | 0 | 0 | 0 | 0 | 1 | 1 | 1 |
| Efl1      | 0 | 0 | 0 | 0 | 1 | 0 | 0 | 0 | 0 | 1 | 1 | 1 |
| Efnb1     | 0 | 0 | 0 | 0 | 1 | 0 | 0 | 0 | 0 | 1 | 1 | 1 |
| Efr3b     | 0 | 0 | 0 | 0 | 1 | 0 | 0 | 0 | 0 | 1 | 1 | 1 |
| Eftud2    | 0 | 0 | 0 | 0 | 1 | 0 | 0 | 0 | 0 | 1 | 1 | 1 |
| Egln1     | 0 | 0 | 0 | 0 | 1 | 0 | 0 | 0 | 0 | 1 | 1 | 1 |
| Egr1      | 0 | 0 | 0 | 0 | 1 | 0 | 0 | 0 | 0 | 1 | 1 | 1 |
| Ehbp1     | 0 | 0 | 0 | 0 | 1 | 0 | 0 | 0 | 0 | 1 | 1 | 1 |
| Ehd1      | 0 | 0 | 0 | 0 | 1 | 0 | 0 | 0 | 0 | 1 | 1 | 1 |
| Ehhadh    | 0 | 0 | 0 | 0 | 1 | 0 | 0 | 0 | 0 | 1 | 1 | 1 |
| Ei24      | 0 | 0 | 0 | 0 | 0 | 1 | 0 | 0 | 0 | 1 | 1 | 1 |
| Eif3b     | 0 | 0 | 0 | 0 | 1 | 0 | 0 | 0 | 0 | 1 | 1 | 1 |
| Eif3g     | 0 | 0 | 0 | 0 | 0 | 0 | 0 | 1 | 0 | 1 | 1 | 1 |
| Eif4enif1 | 0 | 0 | 0 | 0 | 1 | 0 | 0 | 0 | 0 | 1 | 1 | 1 |
| Eif4g1    | 0 | 0 | 0 | 0 | 1 | 0 | 0 | 0 | 0 | 1 | 1 | 1 |
| Eif5b     | 0 | 0 | 0 | 0 | 1 | 0 | 0 | 0 | 0 | 1 | 1 | 1 |
| Elf4      | 0 | 0 | 0 | 0 | 1 | 0 | 0 | 0 | 0 | 1 | 1 | 1 |
| Elp2      | 0 | 0 | 0 | 0 | 1 | 0 | 0 | 0 | 0 | 1 | 1 | 1 |
| Eme2      | 0 | 0 | 0 | 0 | 1 | 0 | 0 | 0 | 0 | 1 | 1 | 1 |
| Eml2      | 0 | 0 | 0 | 0 | 1 | 0 | 0 | 0 | 0 | 1 | 1 | 1 |
| Eml6      | 0 | 0 | 0 | 0 | 1 | 0 | 0 | 0 | 0 | 1 | 1 | 1 |
| Endou     | 0 | 0 | 0 | 0 | 1 | 0 | 0 | 0 | 0 | 1 | 1 | 1 |
| Eno1b     | 0 | 0 | 0 | 0 | 1 | 0 | 0 | 0 | 0 | 1 | 1 | 1 |
| Enpp2     | 0 | 0 | 0 | 0 | 0 | 1 | 0 | 0 | 0 | 1 | 1 | 1 |
| Ep300     | 0 | 0 | 0 | 0 | 0 | 1 | 0 | 0 | 0 | 1 | 1 | 1 |
| Ep400     | 0 | 0 | 0 | 0 | 1 | 0 | 0 | 0 | 0 | 1 | 1 | 1 |
| Epb41l2   | 0 | 0 | 0 | 0 | 1 | 0 | 0 | 0 | 0 | 1 | 1 | 1 |
| Epha5     | 0 | 0 | 0 | 0 | 1 | 0 | 0 | 0 | 0 | 1 | 1 | 1 |
| Epha6     | 0 | 0 | 0 | 0 | 1 | 0 | 0 | 0 | 0 | 1 | 1 | 1 |
| Ephb3     | 0 | 0 | 0 | 0 | 1 | 0 | 0 | 0 | 0 | 1 | 1 | 1 |

|          |   |   |   |   |   |   |   |   |   |   |   |   |
|----------|---|---|---|---|---|---|---|---|---|---|---|---|
| Epm2aip1 | 0 | 0 | 0 | 0 | 1 | 0 | 0 | 0 | 0 | 1 | 1 | 1 |
| Eps8l3   | 0 | 0 | 0 | 0 | 1 | 0 | 0 | 0 | 0 | 1 | 1 | 1 |
| ErbB2    | 0 | 0 | 0 | 0 | 0 | 0 | 0 | 1 | 0 | 1 | 1 | 1 |
| Erbin    | 0 | 0 | 0 | 0 | 0 | 0 | 0 | 1 | 0 | 1 | 1 | 1 |
| Ercc2    | 0 | 0 | 0 | 0 | 1 | 0 | 0 | 0 | 0 | 1 | 1 | 1 |
| Ercc4    | 0 | 0 | 0 | 0 | 1 | 0 | 0 | 0 | 0 | 1 | 1 | 1 |
| Eri1     | 0 | 0 | 0 | 0 | 0 | 0 | 0 | 1 | 0 | 1 | 1 | 1 |
| Ern2     | 0 | 0 | 0 | 0 | 1 | 0 | 0 | 0 | 0 | 1 | 1 | 1 |
| Erp44    | 0 | 0 | 0 | 0 | 1 | 0 | 0 | 0 | 0 | 1 | 1 | 1 |
| Esco1    | 0 | 0 | 0 | 0 | 1 | 0 | 0 | 0 | 0 | 1 | 1 | 1 |
| Esrp2    | 0 | 0 | 0 | 0 | 1 | 0 | 0 | 0 | 0 | 1 | 1 | 1 |
| Esrra    | 0 | 0 | 0 | 0 | 1 | 0 | 0 | 0 | 0 | 1 | 1 | 1 |
| Etd      | 0 | 0 | 0 | 0 | 1 | 0 | 0 | 0 | 0 | 1 | 1 | 1 |
| Evi5     | 0 | 0 | 0 | 0 | 1 | 0 | 0 | 0 | 0 | 1 | 1 | 1 |
| Ewsr1    | 0 | 0 | 0 | 0 | 1 | 0 | 0 | 0 | 0 | 1 | 1 | 1 |
| Exd2     | 0 | 0 | 0 | 0 | 1 | 0 | 0 | 0 | 0 | 1 | 1 | 1 |
| Exoc7    | 0 | 0 | 0 | 0 | 1 | 0 | 0 | 0 | 0 | 1 | 1 | 1 |
| Exog     | 0 | 0 | 0 | 0 | 1 | 0 | 0 | 0 | 0 | 1 | 1 | 1 |
| Extl3    | 0 | 0 | 0 | 0 | 1 | 0 | 0 | 0 | 0 | 1 | 1 | 1 |
| Eya2     | 0 | 0 | 0 | 0 | 1 | 0 | 0 | 0 | 0 | 1 | 1 | 1 |
| Ezh1     | 0 | 0 | 0 | 0 | 1 | 0 | 0 | 0 | 0 | 1 | 1 | 1 |
| F11      | 0 | 0 | 0 | 0 | 1 | 0 | 0 | 0 | 0 | 1 | 1 | 1 |
| F2rl1    | 0 | 0 | 0 | 0 | 1 | 0 | 0 | 0 | 0 | 1 | 1 | 1 |
| Faah     | 0 | 0 | 0 | 0 | 1 | 0 | 0 | 0 | 0 | 1 | 1 | 1 |
| Fabp12   | 0 | 0 | 0 | 0 | 1 | 0 | 0 | 0 | 0 | 1 | 1 | 1 |
| Fabp7    | 0 | 0 | 0 | 0 | 1 | 0 | 0 | 0 | 0 | 1 | 1 | 1 |
| Faf1     | 0 | 0 | 0 | 0 | 1 | 0 | 0 | 0 | 0 | 1 | 1 | 1 |
| Fam102a  | 0 | 0 | 0 | 0 | 1 | 0 | 0 | 0 | 0 | 1 | 1 | 1 |
| Fam117b  | 0 | 0 | 0 | 0 | 1 | 0 | 0 | 0 | 0 | 1 | 1 | 1 |
| Fam122a  | 0 | 0 | 0 | 0 | 1 | 0 | 0 | 0 | 0 | 1 | 1 | 1 |
| Fam133b  | 0 | 0 | 0 | 0 | 1 | 0 | 0 | 0 | 0 | 1 | 1 | 1 |
| Fam160a1 | 0 | 0 | 0 | 0 | 1 | 0 | 0 | 0 | 0 | 1 | 1 | 1 |
| Fam170b  | 0 | 0 | 0 | 0 | 1 | 0 | 0 | 0 | 0 | 1 | 1 | 1 |

|         |   |   |   |   |   |   |   |   |   |   |   |   |
|---------|---|---|---|---|---|---|---|---|---|---|---|---|
| Fam171b | 0 | 0 | 0 | 0 | 1 | 0 | 0 | 0 | 0 | 1 | 1 | 1 |
| Fam187b | 0 | 0 | 0 | 0 | 1 | 0 | 0 | 0 | 0 | 1 | 1 | 1 |
| Fam196a | 0 | 0 | 0 | 0 | 1 | 0 | 0 | 0 | 0 | 1 | 1 | 1 |
| Fam198a | 0 | 0 | 0 | 0 | 1 | 0 | 0 | 0 | 0 | 1 | 1 | 1 |
| Fam208a | 0 | 0 | 0 | 0 | 1 | 0 | 0 | 0 | 0 | 1 | 1 | 1 |
| Fam208b | 0 | 0 | 0 | 0 | 1 | 0 | 0 | 0 | 0 | 1 | 1 | 1 |
| Fam214a | 0 | 0 | 0 | 0 | 1 | 0 | 0 | 0 | 0 | 1 | 1 | 1 |
| Fam229b | 0 | 0 | 0 | 0 | 0 | 0 | 0 | 1 | 0 | 1 | 1 | 1 |
| Fam26d  | 0 | 0 | 0 | 0 | 1 | 0 | 0 | 0 | 0 | 1 | 1 | 1 |
| Fam69b  | 0 | 0 | 0 | 0 | 1 | 0 | 0 | 0 | 0 | 1 | 1 | 1 |
| Fam76a  | 0 | 0 | 0 | 0 | 1 | 0 | 0 | 0 | 0 | 1 | 1 | 1 |
| Fancf   | 0 | 0 | 0 | 0 | 1 | 0 | 0 | 0 | 0 | 1 | 1 | 1 |
| Farp1   | 0 | 0 | 0 | 0 | 1 | 0 | 0 | 0 | 0 | 1 | 1 | 1 |
| Fasl    | 0 | 0 | 0 | 0 | 1 | 0 | 0 | 0 | 0 | 1 | 1 | 1 |
| Fasn    | 0 | 0 | 0 | 0 | 1 | 0 | 0 | 0 | 0 | 1 | 1 | 1 |
| Fat3    | 0 | 0 | 0 | 0 | 1 | 0 | 0 | 0 | 0 | 1 | 1 | 1 |
| Fbln1   | 0 | 0 | 0 | 0 | 1 | 0 | 0 | 0 | 0 | 1 | 1 | 1 |
| Fbln5   | 0 | 0 | 0 | 0 | 0 | 0 | 0 | 1 | 0 | 1 | 1 | 1 |
| Fbn1    | 0 | 0 | 0 | 0 | 1 | 0 | 0 | 0 | 0 | 1 | 1 | 1 |
| Fbrsl1  | 0 | 0 | 0 | 0 | 1 | 0 | 0 | 0 | 0 | 1 | 1 | 1 |
| Fbxl2   | 0 | 0 | 0 | 0 | 0 | 0 | 0 | 1 | 0 | 1 | 1 | 1 |
| Fbxl3   | 0 | 0 | 0 | 0 | 1 | 0 | 0 | 0 | 0 | 1 | 1 | 1 |
| Fbxo34  | 0 | 0 | 0 | 0 | 1 | 0 | 0 | 0 | 0 | 1 | 1 | 1 |
| Fbxo38  | 0 | 0 | 0 | 0 | 1 | 0 | 0 | 0 | 0 | 1 | 1 | 1 |
| Fbxo40  | 0 | 0 | 0 | 0 | 1 | 0 | 0 | 0 | 0 | 1 | 1 | 1 |
| Fbxo8   | 0 | 0 | 0 | 0 | 1 | 0 | 0 | 0 | 0 | 1 | 1 | 1 |
| Fbxw18  | 0 | 0 | 0 | 0 | 0 | 1 | 0 | 0 | 0 | 1 | 1 | 1 |
| Fcf1    | 0 | 0 | 0 | 0 | 1 | 0 | 0 | 0 | 0 | 1 | 1 | 1 |
| Fcgr2b  | 0 | 0 | 0 | 0 | 1 | 0 | 0 | 0 | 0 | 1 | 1 | 1 |
| Fer     | 0 | 0 | 0 | 0 | 0 | 0 | 0 | 1 | 0 | 1 | 1 | 1 |
| Fermt2  | 0 | 0 | 0 | 0 | 1 | 0 | 0 | 0 | 0 | 1 | 1 | 1 |
| Fes     | 0 | 0 | 0 | 0 | 1 | 0 | 0 | 0 | 0 | 1 | 1 | 1 |
| Fez2    | 0 | 0 | 0 | 0 | 1 | 0 | 0 | 0 | 0 | 1 | 1 | 1 |

|         |   |   |   |   |   |   |   |   |   |   |   |   |
|---------|---|---|---|---|---|---|---|---|---|---|---|---|
| Fezf1   | 0 | 0 | 0 | 0 | 1 | 0 | 0 | 0 | 0 | 1 | 1 | 1 |
| Fezf2   | 0 | 0 | 0 | 0 | 1 | 0 | 0 | 0 | 0 | 1 | 1 | 1 |
| Fgb     | 0 | 0 | 0 | 0 | 1 | 0 | 0 | 0 | 0 | 1 | 1 | 1 |
| Fgr     | 0 | 0 | 0 | 0 | 1 | 0 | 0 | 0 | 0 | 1 | 1 | 1 |
| Fhl4    | 0 | 0 | 0 | 0 | 1 | 0 | 0 | 0 | 0 | 1 | 1 | 1 |
| Filip1  | 0 | 0 | 0 | 0 | 1 | 0 | 0 | 0 | 0 | 1 | 1 | 1 |
| Fip1l1  | 0 | 0 | 0 | 0 | 1 | 0 | 0 | 0 | 0 | 1 | 1 | 1 |
| Fkbp10  | 0 | 0 | 0 | 0 | 1 | 0 | 0 | 0 | 0 | 1 | 1 | 1 |
| Fkbp15  | 0 | 0 | 0 | 0 | 1 | 0 | 0 | 0 | 0 | 1 | 1 | 1 |
| Fkbp3   | 0 | 0 | 0 | 0 | 1 | 0 | 0 | 0 | 0 | 1 | 1 | 1 |
| Fkbp5   | 0 | 0 | 0 | 0 | 1 | 0 | 0 | 0 | 0 | 1 | 1 | 1 |
| Flg2    | 0 | 0 | 0 | 0 | 1 | 0 | 0 | 0 | 0 | 1 | 1 | 1 |
| Flnb    | 0 | 0 | 0 | 0 | 1 | 0 | 0 | 0 | 0 | 1 | 1 | 1 |
| Fmo4    | 0 | 0 | 0 | 0 | 1 | 0 | 0 | 0 | 0 | 1 | 1 | 1 |
| Focad   | 0 | 0 | 0 | 0 | 1 | 0 | 0 | 0 | 0 | 1 | 1 | 1 |
| Foxd1   | 0 | 0 | 0 | 0 | 1 | 0 | 0 | 0 | 0 | 1 | 1 | 1 |
| Foxk2   | 0 | 0 | 0 | 0 | 1 | 0 | 0 | 0 | 0 | 1 | 1 | 1 |
| Foxm1   | 0 | 0 | 0 | 0 | 1 | 0 | 0 | 0 | 0 | 1 | 1 | 1 |
| Foxo6   | 0 | 0 | 0 | 0 | 1 | 0 | 0 | 0 | 0 | 1 | 1 | 1 |
| Fpr-rs7 | 0 | 0 | 0 | 0 | 1 | 0 | 0 | 0 | 0 | 1 | 1 | 1 |
| Frem2   | 0 | 0 | 0 | 0 | 1 | 0 | 0 | 0 | 0 | 1 | 1 | 1 |
| Frmd3   | 0 | 0 | 0 | 0 | 1 | 0 | 0 | 0 | 0 | 1 | 1 | 1 |
| Frrs1   | 0 | 0 | 0 | 0 | 1 | 0 | 0 | 0 | 0 | 1 | 1 | 1 |
| Fscb    | 0 | 0 | 0 | 0 | 1 | 0 | 0 | 0 | 0 | 1 | 1 | 1 |
| Ftmt    | 0 | 0 | 0 | 0 | 1 | 0 | 0 | 0 | 0 | 1 | 1 | 1 |
| Fundc2  | 0 | 0 | 0 | 0 | 1 | 0 | 0 | 0 | 0 | 1 | 1 | 1 |
| Fut10   | 0 | 0 | 0 | 0 | 1 | 0 | 0 | 0 | 0 | 1 | 1 | 1 |
| Fyb     | 0 | 0 | 0 | 0 | 1 | 0 | 0 | 0 | 0 | 1 | 1 | 1 |
| Fzd10   | 0 | 0 | 0 | 0 | 1 | 0 | 0 | 0 | 0 | 1 | 1 | 1 |
| Gabrb3  | 0 | 0 | 0 | 0 | 1 | 0 | 0 | 0 | 0 | 1 | 1 | 1 |
| Gad1    | 0 | 0 | 0 | 0 | 1 | 0 | 0 | 0 | 0 | 1 | 1 | 1 |
| Gak     | 0 | 0 | 0 | 0 | 1 | 0 | 0 | 0 | 0 | 1 | 1 | 1 |
| Galnt12 | 0 | 0 | 0 | 0 | 1 | 0 | 0 | 0 | 0 | 1 | 1 | 1 |



|         |   |   |   |   |   |   |   |   |   |   |   |   |
|---------|---|---|---|---|---|---|---|---|---|---|---|---|
| Galnt17 | 0 | 0 | 0 | 0 | 0 | 1 | 0 | 0 | 0 | 1 | 1 | 1 |
| Galnt9  | 0 | 0 | 0 | 0 | 1 | 0 | 0 | 0 | 0 | 1 | 1 | 1 |
| Garnl3  | 0 | 0 | 0 | 0 | 1 | 0 | 0 | 0 | 0 | 1 | 1 | 1 |
| Gas2    | 0 | 0 | 0 | 0 | 1 | 0 | 0 | 0 | 0 | 1 | 1 | 1 |
| Gata2   | 0 | 0 | 0 | 0 | 1 | 0 | 0 | 0 | 0 | 1 | 1 | 1 |
| Gatad2a | 0 | 0 | 0 | 0 | 1 | 0 | 0 | 0 | 0 | 1 | 1 | 1 |
| Gatad2b | 0 | 0 | 0 | 0 | 1 | 0 | 0 | 0 | 0 | 1 | 1 | 1 |
| Gbf1    | 0 | 0 | 0 | 0 | 1 | 0 | 0 | 0 | 0 | 1 | 1 | 1 |
| Gbgt1   | 0 | 0 | 0 | 0 | 1 | 0 | 0 | 0 | 0 | 1 | 1 | 1 |
| Gcg     | 0 | 0 | 0 | 0 | 1 | 0 | 0 | 0 | 0 | 1 | 1 | 1 |
| Gcm1    | 0 | 0 | 0 | 0 | 1 | 0 | 0 | 0 | 0 | 1 | 1 | 1 |
| Gcn1l1  | 0 | 0 | 0 | 0 | 1 | 0 | 0 | 0 | 0 | 1 | 1 | 1 |
| Gdpd4   | 0 | 0 | 0 | 0 | 0 | 1 | 0 | 0 | 0 | 1 | 1 | 1 |
| Gemin5  | 0 | 0 | 0 | 0 | 1 | 0 | 0 | 0 | 0 | 1 | 1 | 1 |
| Gen1    | 0 | 0 | 0 | 0 | 0 | 1 | 0 | 0 | 0 | 1 | 1 | 1 |
| Gfm2    | 0 | 0 | 0 | 0 | 1 | 0 | 0 | 0 | 0 | 1 | 1 | 1 |
| Ggn     | 0 | 0 | 0 | 0 | 1 | 0 | 0 | 0 | 0 | 1 | 1 | 1 |
| Ghr     | 0 | 0 | 0 | 0 | 1 | 0 | 0 | 0 | 0 | 1 | 1 | 1 |
| Gigyf1  | 0 | 0 | 0 | 0 | 1 | 0 | 0 | 0 | 0 | 1 | 1 | 1 |
| Gja8    | 0 | 0 | 0 | 0 | 1 | 0 | 0 | 0 | 0 | 1 | 1 | 1 |
| Gjb2    | 0 | 0 | 0 | 0 | 1 | 0 | 0 | 0 | 0 | 1 | 1 | 1 |
| Glg1    | 0 | 0 | 0 | 0 | 1 | 0 | 0 | 0 | 0 | 1 | 1 | 1 |
| GImp    | 0 | 0 | 0 | 0 | 1 | 0 | 0 | 0 | 0 | 1 | 1 | 1 |
| Gm10377 | 0 | 0 | 0 | 0 | 1 | 0 | 0 | 0 | 0 | 1 | 1 | 1 |
| Gm11564 | 0 | 0 | 0 | 0 | 1 | 0 | 0 | 0 | 0 | 1 | 1 | 1 |
| Gm13088 | 0 | 0 | 0 | 0 | 1 | 0 | 0 | 0 | 0 | 1 | 1 | 1 |
| Gm13271 | 0 | 0 | 0 | 0 | 1 | 0 | 0 | 0 | 0 | 1 | 1 | 1 |
| Gm13762 | 0 | 0 | 0 | 0 | 1 | 0 | 0 | 0 | 0 | 1 | 1 | 1 |
| Gm14085 | 0 | 0 | 0 | 0 | 1 | 0 | 0 | 0 | 0 | 1 | 1 | 1 |
| Gm14410 | 0 | 0 | 0 | 0 | 0 | 0 | 0 | 1 | 0 | 1 | 1 | 1 |
| Gm14496 | 0 | 1 | 0 | 0 | 0 | 0 | 0 | 0 | 0 | 1 | 1 | 1 |
| Gm20730 | 0 | 0 | 0 | 0 | 1 | 0 | 0 | 0 | 0 | 1 | 1 | 1 |
| Gm3550  | 0 | 0 | 0 | 0 | 1 | 0 | 0 | 0 | 0 | 1 | 1 | 1 |



|         |   |   |   |   |   |   |   |   |   |   |   |   |
|---------|---|---|---|---|---|---|---|---|---|---|---|---|
| Grik5   | 0 | 0 | 0 | 0 | 1 | 0 | 0 | 0 | 0 | 1 | 1 | 1 |
| Grin1   | 0 | 0 | 0 | 0 | 1 | 0 | 0 | 0 | 0 | 1 | 1 | 1 |
| Grip1   | 0 | 0 | 0 | 0 | 1 | 0 | 0 | 0 | 0 | 1 | 1 | 1 |
| Grk5    | 0 | 0 | 0 | 0 | 0 | 0 | 0 | 1 | 0 | 1 | 1 | 1 |
| Grm8    | 0 | 0 | 0 | 0 | 1 | 0 | 0 | 0 | 0 | 1 | 1 | 1 |
| Grwd1   | 0 | 0 | 0 | 0 | 1 | 0 | 0 | 0 | 0 | 1 | 1 | 1 |
| Gspt1   | 0 | 0 | 0 | 0 | 1 | 0 | 0 | 0 | 0 | 1 | 1 | 1 |
| Gspt2   | 0 | 0 | 0 | 0 | 1 | 0 | 0 | 0 | 0 | 1 | 1 | 1 |
| Gstm2   | 0 | 0 | 0 | 0 | 1 | 0 | 0 | 0 | 0 | 1 | 1 | 1 |
| Gstp3   | 0 | 0 | 0 | 0 | 1 | 0 | 0 | 0 | 0 | 1 | 1 | 1 |
| Gtf2a2  | 0 | 0 | 0 | 0 | 0 | 1 | 0 | 0 | 0 | 1 | 1 | 1 |
| Gtf2e1  | 0 | 0 | 0 | 0 | 1 | 0 | 0 | 0 | 0 | 1 | 1 | 1 |
| Gtf3c1  | 0 | 0 | 0 | 0 | 1 | 0 | 0 | 0 | 0 | 1 | 1 | 1 |
| Gtf3c4  | 0 | 0 | 0 | 0 | 1 | 0 | 0 | 0 | 0 | 1 | 1 | 1 |
| Gtf3c5  | 0 | 0 | 0 | 0 | 1 | 0 | 0 | 0 | 0 | 1 | 1 | 1 |
| Gtpbp6  | 0 | 0 | 0 | 0 | 1 | 0 | 0 | 0 | 0 | 1 | 1 | 1 |
| Gtse1   | 0 | 0 | 0 | 0 | 1 | 0 | 0 | 0 | 0 | 1 | 1 | 1 |
| Gtsf1   | 0 | 0 | 0 | 0 | 0 | 0 | 0 | 1 | 0 | 1 | 1 | 1 |
| Guca1b  | 0 | 0 | 0 | 0 | 1 | 0 | 0 | 0 | 0 | 1 | 1 | 1 |
| Gucy1a2 | 0 | 0 | 0 | 0 | 1 | 0 | 0 | 0 | 0 | 1 | 1 | 1 |
| Gvin1   | 0 | 0 | 0 | 0 | 1 | 0 | 0 | 0 | 0 | 1 | 1 | 1 |
| Gzf1    | 0 | 0 | 0 | 0 | 1 | 0 | 0 | 0 | 0 | 1 | 1 | 1 |
| Gzmd    | 0 | 0 | 0 | 0 | 1 | 0 | 0 | 0 | 0 | 1 | 1 | 1 |
| H2afx   | 0 | 0 | 0 | 0 | 1 | 0 | 0 | 0 | 0 | 1 | 1 | 1 |
| H2al1o  | 0 | 0 | 0 | 0 | 1 | 0 | 0 | 0 | 0 | 1 | 1 | 1 |
| H6pd    | 0 | 0 | 0 | 0 | 1 | 0 | 0 | 0 | 0 | 1 | 1 | 1 |
| Hars    | 0 | 0 | 0 | 0 | 1 | 0 | 0 | 0 | 0 | 1 | 1 | 1 |
| Has1    | 0 | 0 | 0 | 0 | 1 | 0 | 0 | 0 | 0 | 1 | 1 | 1 |
| Haus3   | 0 | 0 | 0 | 0 | 0 | 1 | 0 | 0 | 0 | 1 | 1 | 1 |
| Hax1    | 0 | 0 | 0 | 0 | 1 | 0 | 0 | 0 | 0 | 1 | 1 | 1 |
| Hc      | 0 | 0 | 0 | 0 | 1 | 0 | 0 | 0 | 0 | 1 | 1 | 1 |
| Hdac1   | 0 | 0 | 0 | 0 | 1 | 0 | 0 | 0 | 0 | 1 | 1 | 1 |
| Hdac11  | 0 | 0 | 0 | 0 | 1 | 0 | 0 | 0 | 0 | 1 | 1 | 1 |

|          |   |   |   |   |   |   |   |   |   |   |   |   |
|----------|---|---|---|---|---|---|---|---|---|---|---|---|
| Hdhd2    | 0 | 0 | 0 | 0 | 1 | 0 | 0 | 0 | 0 | 1 | 1 | 1 |
| Heatr1   | 0 | 0 | 0 | 0 | 1 | 0 | 0 | 0 | 0 | 1 | 1 | 1 |
| Heatr5b  | 0 | 0 | 0 | 0 | 1 | 0 | 0 | 0 | 0 | 1 | 1 | 1 |
| Heatr6   | 0 | 0 | 0 | 0 | 1 | 0 | 0 | 0 | 0 | 1 | 1 | 1 |
| Hectd1   | 0 | 0 | 0 | 0 | 1 | 0 | 0 | 0 | 0 | 1 | 1 | 1 |
| Hectd4   | 0 | 0 | 0 | 0 | 1 | 0 | 0 | 0 | 0 | 1 | 1 | 1 |
| Hecw2    | 0 | 0 | 0 | 0 | 1 | 0 | 0 | 0 | 0 | 1 | 1 | 1 |
| Helb     | 0 | 0 | 0 | 0 | 1 | 0 | 0 | 0 | 0 | 1 | 1 | 1 |
| Heph11   | 0 | 0 | 0 | 0 | 1 | 0 | 0 | 0 | 0 | 1 | 1 | 1 |
| Herc3    | 0 | 0 | 0 | 0 | 1 | 0 | 0 | 0 | 0 | 1 | 1 | 1 |
| Herc4    | 0 | 0 | 0 | 0 | 1 | 0 | 0 | 0 | 0 | 1 | 1 | 1 |
| Herc6    | 0 | 1 | 0 | 0 | 0 | 0 | 0 | 0 | 0 | 1 | 1 | 1 |
| Hfm1     | 0 | 0 | 0 | 0 | 1 | 0 | 0 | 0 | 0 | 1 | 1 | 1 |
| Hif1a    | 0 | 0 | 0 | 0 | 1 | 0 | 0 | 0 | 0 | 1 | 1 | 1 |
| Hip1     | 0 | 0 | 0 | 0 | 1 | 0 | 0 | 0 | 0 | 1 | 1 | 1 |
| Hira     | 0 | 0 | 0 | 0 | 1 | 0 | 0 | 0 | 0 | 1 | 1 | 1 |
| Hist1h1d | 0 | 0 | 0 | 0 | 1 | 0 | 0 | 0 | 0 | 1 | 1 | 1 |
| Hist1h4j | 0 | 0 | 0 | 0 | 1 | 0 | 0 | 0 | 0 | 1 | 1 | 1 |
| Hnf4g    | 0 | 0 | 0 | 0 | 1 | 0 | 0 | 0 | 0 | 1 | 1 | 1 |
| Hnrnpa3  | 0 | 0 | 0 | 0 | 1 | 0 | 0 | 0 | 0 | 1 | 1 | 1 |
| Hnrnpf   | 0 | 0 | 0 | 0 | 1 | 0 | 0 | 0 | 0 | 1 | 1 | 1 |
| Hnrnpul1 | 0 | 0 | 0 | 0 | 1 | 0 | 0 | 0 | 0 | 1 | 1 | 1 |
| Hoxb6    | 0 | 0 | 0 | 0 | 1 | 0 | 0 | 0 | 0 | 1 | 1 | 1 |
| Hpn      | 0 | 0 | 0 | 0 | 1 | 0 | 0 | 0 | 0 | 1 | 1 | 1 |
| Hras     | 0 | 0 | 0 | 0 | 1 | 0 | 0 | 0 | 0 | 1 | 1 | 1 |
| Hs3st4   | 0 | 0 | 0 | 0 | 1 | 0 | 0 | 0 | 0 | 1 | 1 | 1 |
| Hs6st1   | 0 | 0 | 0 | 0 | 1 | 0 | 0 | 0 | 0 | 1 | 1 | 1 |
| Hsd17b10 | 0 | 0 | 0 | 0 | 1 | 0 | 0 | 0 | 0 | 1 | 1 | 1 |
| Hsd3b1   | 0 | 0 | 0 | 0 | 1 | 0 | 0 | 0 | 0 | 1 | 1 | 1 |
| Hspa1a   | 0 | 0 | 0 | 0 | 1 | 0 | 0 | 0 | 0 | 1 | 1 | 1 |
| Hspa1l   | 0 | 0 | 0 | 0 | 1 | 0 | 0 | 0 | 0 | 1 | 1 | 1 |
| Hspa8    | 0 | 0 | 0 | 0 | 1 | 0 | 0 | 0 | 0 | 1 | 1 | 1 |
| Hspb7    | 0 | 0 | 0 | 0 | 1 | 0 | 0 | 0 | 0 | 1 | 1 | 1 |

|            |   |   |   |   |   |   |   |   |   |   |   |   |
|------------|---|---|---|---|---|---|---|---|---|---|---|---|
| Hspd1      | 0 | 0 | 0 | 0 | 1 | 0 | 0 | 0 | 0 | 1 | 1 | 1 |
| Htati2     | 0 | 0 | 0 | 0 | 1 | 0 | 0 | 0 | 0 | 1 | 1 | 1 |
| Htr2b      | 0 | 0 | 0 | 0 | 1 | 0 | 0 | 0 | 0 | 1 | 1 | 1 |
| Htt        | 0 | 0 | 0 | 0 | 1 | 0 | 0 | 0 | 0 | 1 | 1 | 1 |
| Hyou1      | 0 | 0 | 0 | 0 | 0 | 1 | 0 | 0 | 0 | 1 | 1 | 1 |
| lbsp       | 0 | 0 | 0 | 0 | 1 | 0 | 0 | 0 | 0 | 1 | 1 | 1 |
| lbtk       | 0 | 0 | 0 | 0 | 0 | 0 | 0 | 1 | 0 | 1 | 1 | 1 |
| lcam4      | 0 | 0 | 0 | 0 | 1 | 0 | 0 | 0 | 0 | 1 | 1 | 1 |
| ldh3b      | 0 | 0 | 0 | 0 | 1 | 0 | 0 | 0 | 0 | 1 | 1 | 1 |
| lfit3      | 0 | 0 | 0 | 0 | 1 | 0 | 0 | 0 | 0 | 1 | 1 | 1 |
| lfna5      | 0 | 0 | 0 | 0 | 1 | 0 | 0 | 0 | 0 | 1 | 1 | 1 |
| lfrd2      | 0 | 0 | 0 | 0 | 0 | 0 | 0 | 0 | 1 | 1 | 1 | 1 |
| lft140     | 0 | 0 | 0 | 0 | 0 | 1 | 0 | 0 | 0 | 1 | 1 | 1 |
| lgfbp2     | 0 | 0 | 0 | 0 | 1 | 0 | 0 | 0 | 0 | 1 | 1 | 1 |
| lghv1-53   | 0 | 0 | 0 | 0 | 1 | 0 | 0 | 0 | 0 | 1 | 1 | 1 |
| lghv1-84   | 0 | 0 | 0 | 0 | 1 | 0 | 0 | 0 | 0 | 1 | 1 | 1 |
| lghv1-85   | 0 | 0 | 0 | 0 | 1 | 0 | 0 | 0 | 0 | 1 | 1 | 1 |
| lghv3-5    | 0 | 0 | 0 | 0 | 1 | 0 | 0 | 0 | 0 | 1 | 1 | 1 |
| lghv7-4    | 0 | 0 | 0 | 0 | 1 | 0 | 0 | 0 | 0 | 1 | 1 | 1 |
| lgkv1-133  | 0 | 0 | 0 | 0 | 1 | 0 | 0 | 0 | 0 | 1 | 1 | 1 |
| lgkv12-46  | 0 | 0 | 0 | 0 | 1 | 0 | 0 | 0 | 0 | 1 | 1 | 1 |
| lgkv14-100 | 0 | 0 | 0 | 0 | 1 | 0 | 0 | 0 | 0 | 1 | 1 | 1 |
| lgkv8-19   | 0 | 0 | 0 | 0 | 1 | 0 | 0 | 0 | 0 | 1 | 1 | 1 |
| lgkv9-123  | 0 | 0 | 0 | 0 | 1 | 0 | 0 | 0 | 0 | 1 | 1 | 1 |
| lgsf1      | 0 | 0 | 0 | 0 | 0 | 0 | 0 | 1 | 0 | 1 | 1 | 1 |
| lgsf21     | 0 | 0 | 0 | 0 | 1 | 0 | 0 | 0 | 0 | 1 | 1 | 1 |
| lkzf2      | 0 | 0 | 0 | 0 | 1 | 0 | 0 | 0 | 0 | 1 | 1 | 1 |
| ll16       | 0 | 0 | 0 | 0 | 1 | 0 | 0 | 0 | 0 | 1 | 1 | 1 |
| ll17rc     | 0 | 0 | 0 | 0 | 1 | 0 | 0 | 0 | 0 | 1 | 1 | 1 |
| ll1r2      | 0 | 0 | 0 | 0 | 1 | 0 | 0 | 0 | 0 | 1 | 1 | 1 |
| ll1rap     | 0 | 0 | 0 | 0 | 0 | 1 | 0 | 0 | 0 | 1 | 1 | 1 |
| ll1rl1     | 0 | 0 | 0 | 0 | 1 | 0 | 0 | 0 | 0 | 1 | 1 | 1 |
| ll31       | 0 | 0 | 0 | 0 | 1 | 0 | 0 | 0 | 0 | 1 | 1 | 1 |

|          |   |   |   |   |   |   |   |   |   |   |   |   |
|----------|---|---|---|---|---|---|---|---|---|---|---|---|
| Il6st    | 0 | 0 | 0 | 0 | 1 | 0 | 0 | 0 | 0 | 1 | 1 | 1 |
| Il9r     | 0 | 0 | 0 | 0 | 1 | 0 | 0 | 0 | 0 | 1 | 1 | 1 |
| Ilf3     | 0 | 0 | 0 | 0 | 1 | 0 | 0 | 0 | 0 | 1 | 1 | 1 |
| Ilvbl    | 0 | 0 | 0 | 0 | 1 | 0 | 0 | 0 | 0 | 1 | 1 | 1 |
| Immp2l   | 0 | 0 | 0 | 0 | 1 | 0 | 0 | 0 | 0 | 1 | 1 | 1 |
| Inpp1    | 0 | 0 | 0 | 0 | 1 | 0 | 0 | 0 | 0 | 1 | 1 | 1 |
| Inpp4a   | 0 | 0 | 0 | 0 | 1 | 0 | 0 | 0 | 0 | 1 | 1 | 1 |
| Inppl1   | 0 | 0 | 0 | 0 | 0 | 0 | 0 | 1 | 0 | 1 | 1 | 1 |
| Ints14   | 0 | 0 | 0 | 0 | 1 | 0 | 0 | 0 | 0 | 1 | 1 | 1 |
| Ints7    | 0 | 0 | 0 | 0 | 1 | 0 | 0 | 0 | 0 | 1 | 1 | 1 |
| Ipcef1   | 0 | 0 | 0 | 0 | 1 | 0 | 0 | 0 | 0 | 1 | 1 | 1 |
| Ipo7     | 0 | 0 | 0 | 0 | 1 | 0 | 0 | 0 | 0 | 1 | 1 | 1 |
| Ipp      | 0 | 0 | 0 | 0 | 1 | 0 | 0 | 0 | 0 | 1 | 1 | 1 |
| Irf2bp1  | 0 | 0 | 0 | 0 | 1 | 0 | 0 | 0 | 0 | 1 | 1 | 1 |
| Irf2bpl  | 0 | 0 | 0 | 0 | 1 | 0 | 0 | 0 | 0 | 1 | 1 | 1 |
| Irf4     | 0 | 0 | 0 | 0 | 1 | 0 | 0 | 0 | 0 | 1 | 1 | 1 |
| Irgm2    | 0 | 0 | 0 | 0 | 1 | 0 | 0 | 0 | 0 | 1 | 1 | 1 |
| Irs1     | 0 | 0 | 0 | 0 | 1 | 0 | 0 | 0 | 0 | 1 | 1 | 1 |
| Itfg1    | 0 | 0 | 0 | 0 | 1 | 0 | 0 | 0 | 0 | 1 | 1 | 1 |
| Itgad    | 0 | 0 | 0 | 0 | 1 | 0 | 0 | 0 | 0 | 1 | 1 | 1 |
| Itgal    | 0 | 0 | 0 | 0 | 1 | 0 | 0 | 0 | 0 | 1 | 1 | 1 |
| Itgb6    | 0 | 0 | 0 | 0 | 1 | 0 | 0 | 0 | 0 | 1 | 1 | 1 |
| Itgb8    | 0 | 0 | 0 | 0 | 0 | 0 | 0 | 1 | 0 | 1 | 1 | 1 |
| Itih5    | 0 | 0 | 0 | 0 | 1 | 0 | 0 | 0 | 0 | 1 | 1 | 1 |
| Itln1    | 0 | 0 | 0 | 0 | 1 | 0 | 0 | 0 | 0 | 1 | 1 | 1 |
| Itm2c    | 0 | 0 | 0 | 0 | 1 | 0 | 0 | 0 | 0 | 1 | 1 | 1 |
| Itpr1    | 0 | 0 | 0 | 0 | 1 | 0 | 0 | 0 | 0 | 1 | 1 | 1 |
| Itpripl2 | 0 | 0 | 0 | 0 | 1 | 0 | 0 | 0 | 0 | 1 | 1 | 1 |
| Itsn1    | 0 | 0 | 0 | 0 | 1 | 0 | 0 | 0 | 0 | 1 | 1 | 1 |
| Itsn2    | 0 | 0 | 0 | 0 | 1 | 0 | 0 | 0 | 0 | 1 | 1 | 1 |
| Iyd      | 0 | 0 | 0 | 0 | 1 | 0 | 0 | 0 | 0 | 1 | 1 | 1 |
| Jak3     | 0 | 0 | 0 | 0 | 1 | 0 | 0 | 0 | 0 | 1 | 1 | 1 |
| Jcad     | 0 | 0 | 0 | 0 | 1 | 0 | 0 | 0 | 0 | 1 | 1 | 1 |

|         |   |   |   |   |   |   |   |   |   |   |   |   |
|---------|---|---|---|---|---|---|---|---|---|---|---|---|
| Jph4    | 0 | 0 | 0 | 0 | 1 | 0 | 0 | 0 | 0 | 1 | 1 | 1 |
| Jup     | 0 | 0 | 0 | 0 | 1 | 0 | 0 | 0 | 0 | 1 | 1 | 1 |
| Kank2   | 0 | 0 | 0 | 0 | 1 | 0 | 0 | 0 | 0 | 1 | 1 | 1 |
| Kars    | 0 | 0 | 0 | 0 | 1 | 0 | 0 | 0 | 0 | 1 | 1 | 1 |
| Kat6a   | 0 | 0 | 0 | 0 | 1 | 0 | 0 | 0 | 0 | 1 | 1 | 1 |
| Kat7    | 0 | 0 | 0 | 0 | 1 | 0 | 0 | 0 | 0 | 1 | 1 | 1 |
| Kcnc2   | 0 | 0 | 0 | 0 | 1 | 0 | 0 | 0 | 0 | 1 | 1 | 1 |
| Kcnd2   | 0 | 0 | 0 | 0 | 0 | 1 | 0 | 0 | 0 | 1 | 1 | 1 |
| Kcni8   | 0 | 0 | 0 | 0 | 1 | 0 | 0 | 0 | 0 | 1 | 1 | 1 |
| Kcnj16  | 0 | 0 | 0 | 0 | 1 | 0 | 0 | 0 | 0 | 1 | 1 | 1 |
| Kcnj3   | 0 | 0 | 0 | 0 | 1 | 0 | 0 | 0 | 0 | 1 | 1 | 1 |
| Kcnj5   | 0 | 0 | 0 | 0 | 1 | 0 | 0 | 0 | 0 | 1 | 1 | 1 |
| Kcnj8   | 0 | 0 | 0 | 0 | 1 | 0 | 0 | 0 | 0 | 1 | 1 | 1 |
| Kcnk13  | 0 | 0 | 0 | 0 | 1 | 0 | 0 | 0 | 0 | 1 | 1 | 1 |
| Kcnk4   | 0 | 0 | 0 | 0 | 0 | 1 | 0 | 0 | 0 | 1 | 1 | 1 |
| Kcnmb2  | 0 | 0 | 0 | 0 | 1 | 0 | 0 | 0 | 0 | 1 | 1 | 1 |
| Kcnq1   | 0 | 0 | 0 | 0 | 1 | 0 | 0 | 0 | 0 | 1 | 1 | 1 |
| Kcnq2   | 0 | 0 | 0 | 0 | 1 | 0 | 0 | 0 | 0 | 1 | 1 | 1 |
| Kcnq3   | 0 | 0 | 0 | 0 | 1 | 0 | 0 | 0 | 0 | 1 | 1 | 1 |
| Kcnq4   | 0 | 0 | 0 | 0 | 1 | 0 | 0 | 0 | 0 | 1 | 1 | 1 |
| Kctd19  | 0 | 0 | 0 | 0 | 1 | 0 | 0 | 0 | 0 | 1 | 1 | 1 |
| Kdm2a   | 0 | 0 | 0 | 0 | 1 | 0 | 0 | 0 | 0 | 1 | 1 | 1 |
| Kdm4b   | 0 | 0 | 0 | 0 | 1 | 0 | 0 | 0 | 0 | 1 | 1 | 1 |
| Kdm6b   | 0 | 0 | 0 | 0 | 1 | 0 | 0 | 0 | 0 | 1 | 1 | 1 |
| Kdr     | 0 | 0 | 0 | 0 | 1 | 0 | 0 | 0 | 0 | 1 | 1 | 1 |
| Kel     | 0 | 0 | 0 | 0 | 1 | 0 | 0 | 0 | 0 | 1 | 1 | 1 |
| Khdrbs1 | 0 | 0 | 0 | 0 | 1 | 0 | 0 | 0 | 0 | 1 | 1 | 1 |
| Khk     | 0 | 0 | 0 | 0 | 0 | 1 | 0 | 0 | 0 | 1 | 1 | 1 |
| Kif13b  | 0 | 0 | 0 | 0 | 1 | 0 | 0 | 0 | 0 | 1 | 1 | 1 |
| Kif14   | 0 | 0 | 0 | 0 | 1 | 0 | 0 | 0 | 0 | 1 | 1 | 1 |
| Kif1a   | 0 | 0 | 0 | 0 | 1 | 0 | 0 | 0 | 0 | 1 | 1 | 1 |
| Kif1b   | 0 | 0 | 0 | 0 | 1 | 0 | 0 | 0 | 0 | 1 | 1 | 1 |
| Kif21a  | 0 | 0 | 0 | 0 | 0 | 1 | 0 | 0 | 0 | 1 | 1 | 1 |

|         |   |   |   |   |   |   |   |   |   |   |   |   |
|---------|---|---|---|---|---|---|---|---|---|---|---|---|
| Kif26b  | 0 | 0 | 0 | 0 | 1 | 0 | 0 | 0 | 0 | 1 | 1 | 1 |
| Kif4    | 0 | 0 | 0 | 0 | 1 | 0 | 0 | 0 | 0 | 1 | 1 | 1 |
| Kifc3   | 0 | 0 | 0 | 0 | 1 | 0 | 0 | 0 | 0 | 1 | 1 | 1 |
| Kifc5b  | 0 | 0 | 0 | 0 | 1 | 0 | 0 | 0 | 0 | 1 | 1 | 1 |
| Kirrel3 | 0 | 0 | 0 | 0 | 1 | 0 | 0 | 0 | 0 | 1 | 1 | 1 |
| Klhl22  | 0 | 0 | 0 | 0 | 1 | 0 | 0 | 0 | 0 | 1 | 1 | 1 |
| Klhl25  | 0 | 0 | 0 | 0 | 1 | 0 | 0 | 0 | 0 | 1 | 1 | 1 |
| Klhl29  | 0 | 0 | 0 | 0 | 1 | 0 | 0 | 0 | 0 | 1 | 1 | 1 |
| Klk11   | 0 | 0 | 0 | 0 | 1 | 0 | 0 | 0 | 0 | 1 | 1 | 1 |
| Klk1b21 | 0 | 0 | 0 | 0 | 1 | 0 | 0 | 0 | 0 | 1 | 1 | 1 |
| Klra9   | 0 | 0 | 0 | 0 | 1 | 0 | 0 | 0 | 0 | 1 | 1 | 1 |
| Klrb1   | 0 | 0 | 0 | 0 | 1 | 0 | 0 | 0 | 0 | 1 | 1 | 1 |
| Klrc1   | 0 | 0 | 0 | 0 | 0 | 1 | 0 | 0 | 0 | 1 | 1 | 1 |
| Kmt2a   | 0 | 0 | 0 | 0 | 1 | 0 | 0 | 0 | 0 | 1 | 1 | 1 |
| Kmt2c   | 0 | 0 | 0 | 0 | 1 | 0 | 0 | 0 | 0 | 1 | 1 | 1 |
| Kmt5a   | 0 | 0 | 0 | 0 | 1 | 0 | 0 | 0 | 0 | 1 | 1 | 1 |
| Kndc1   | 0 | 0 | 0 | 0 | 1 | 0 | 0 | 0 | 0 | 1 | 1 | 1 |
| Kpna7   | 0 | 0 | 0 | 0 | 1 | 0 | 0 | 0 | 0 | 1 | 1 | 1 |
| Krt19   | 0 | 0 | 0 | 0 | 1 | 0 | 0 | 0 | 0 | 1 | 1 | 1 |
| Krt20   | 0 | 0 | 0 | 0 | 1 | 0 | 0 | 0 | 0 | 1 | 1 | 1 |
| Krt222  | 0 | 0 | 0 | 0 | 1 | 0 | 0 | 0 | 0 | 1 | 1 | 1 |
| Krt42   | 0 | 0 | 0 | 0 | 1 | 0 | 0 | 0 | 0 | 1 | 1 | 1 |
| Krt6b   | 0 | 0 | 0 | 0 | 1 | 0 | 0 | 0 | 0 | 1 | 1 | 1 |
| Krt75   | 0 | 0 | 0 | 0 | 1 | 0 | 0 | 0 | 0 | 1 | 1 | 1 |
| Krt76   | 0 | 0 | 0 | 0 | 1 | 0 | 0 | 0 | 0 | 1 | 1 | 1 |
| Krt78   | 0 | 0 | 0 | 0 | 1 | 0 | 0 | 0 | 0 | 1 | 1 | 1 |
| Lacc1   | 0 | 0 | 0 | 0 | 1 | 0 | 0 | 0 | 0 | 1 | 1 | 1 |
| Lama3   | 0 | 0 | 0 | 0 | 1 | 0 | 0 | 0 | 0 | 1 | 1 | 1 |
| Lama4   | 0 | 0 | 0 | 0 | 1 | 0 | 0 | 0 | 0 | 1 | 1 | 1 |
| Lamb2   | 0 | 0 | 0 | 0 | 1 | 0 | 0 | 0 | 0 | 1 | 1 | 1 |
| Larp4b  | 0 | 0 | 0 | 0 | 1 | 0 | 0 | 0 | 0 | 1 | 1 | 1 |
| Lats2   | 0 | 0 | 0 | 0 | 1 | 0 | 0 | 0 | 0 | 1 | 1 | 1 |
| Lbr     | 0 | 0 | 0 | 0 | 1 | 0 | 0 | 0 | 0 | 1 | 1 | 1 |



|        |   |   |   |   |   |   |   |   |   |   |   |   |
|--------|---|---|---|---|---|---|---|---|---|---|---|---|
| Lcorl  | 0 | 0 | 0 | 0 | 1 | 0 | 0 | 0 | 0 | 1 | 1 | 1 |
| Lct    | 0 | 0 | 0 | 0 | 1 | 0 | 0 | 0 | 0 | 1 | 1 | 1 |
| Ldb1   | 0 | 0 | 0 | 0 | 1 | 0 | 0 | 0 | 0 | 1 | 1 | 1 |
| Lgals8 | 0 | 0 | 0 | 0 | 1 | 0 | 0 | 0 | 0 | 1 | 1 | 1 |
| Lgi3   | 0 | 0 | 0 | 0 | 1 | 0 | 0 | 0 | 0 | 1 | 1 | 1 |
| Lhx3   | 0 | 0 | 0 | 0 | 1 | 0 | 0 | 0 | 0 | 1 | 1 | 1 |
| Lhx4   | 0 | 0 | 0 | 0 | 1 | 0 | 0 | 0 | 0 | 1 | 1 | 1 |
| Lingo4 | 0 | 0 | 0 | 0 | 1 | 0 | 0 | 0 | 0 | 1 | 1 | 1 |
| Lipc   | 0 | 0 | 0 | 0 | 1 | 0 | 0 | 0 | 0 | 1 | 1 | 1 |
| Lipi   | 0 | 0 | 0 | 0 | 1 | 0 | 0 | 0 | 0 | 1 | 1 | 1 |
| Lipo1  | 0 | 0 | 0 | 0 | 1 | 0 | 0 | 0 | 0 | 1 | 1 | 1 |
| Llg1   | 0 | 0 | 0 | 0 | 1 | 0 | 0 | 0 | 0 | 1 | 1 | 1 |
| Lmbr1l | 0 | 0 | 0 | 0 | 1 | 0 | 0 | 0 | 0 | 1 | 1 | 1 |
| Lmo7   | 0 | 0 | 0 | 0 | 0 | 1 | 0 | 0 | 0 | 1 | 1 | 1 |
| Lnx1   | 0 | 0 | 0 | 0 | 1 | 0 | 0 | 0 | 0 | 1 | 1 | 1 |
| Lnx2   | 0 | 0 | 0 | 0 | 0 | 1 | 0 | 0 | 0 | 1 | 1 | 1 |
| Loxl4  | 0 | 0 | 0 | 0 | 1 | 0 | 0 | 0 | 0 | 1 | 1 | 1 |
| Lpcat1 | 0 | 0 | 0 | 0 | 1 | 0 | 0 | 0 | 0 | 1 | 1 | 1 |
| Lpp    | 0 | 0 | 0 | 0 | 1 | 0 | 0 | 0 | 0 | 1 | 1 | 1 |
| Lrba   | 0 | 0 | 0 | 0 | 1 | 0 | 0 | 0 | 0 | 1 | 1 | 1 |
| Lrfn4  | 0 | 0 | 0 | 0 | 1 | 0 | 0 | 0 | 0 | 1 | 1 | 1 |
| Lrit2  | 0 | 0 | 0 | 0 | 1 | 0 | 0 | 0 | 0 | 1 | 1 | 1 |
| Lrmp   | 0 | 0 | 0 | 0 | 1 | 0 | 0 | 0 | 0 | 1 | 1 | 1 |
| Lrpap1 | 0 | 0 | 0 | 0 | 1 | 0 | 0 | 0 | 0 | 1 | 1 | 1 |
| Lrrc17 | 0 | 0 | 0 | 0 | 1 | 0 | 0 | 0 | 0 | 1 | 1 | 1 |
| Lrrc28 | 0 | 0 | 0 | 0 | 1 | 0 | 0 | 0 | 0 | 1 | 1 | 1 |
| Lrrc30 | 0 | 0 | 0 | 0 | 1 | 0 | 0 | 0 | 0 | 1 | 1 | 1 |
| Lrrc49 | 0 | 0 | 0 | 0 | 1 | 0 | 0 | 0 | 0 | 1 | 1 | 1 |
| Lrrc66 | 0 | 0 | 0 | 0 | 1 | 0 | 0 | 0 | 0 | 1 | 1 | 1 |
| Lrrd1  | 0 | 0 | 0 | 0 | 1 | 0 | 0 | 0 | 0 | 1 | 1 | 1 |
| Lrriq1 | 0 | 0 | 0 | 0 | 1 | 0 | 0 | 0 | 0 | 1 | 1 | 1 |
| Lrrtm4 | 0 | 0 | 0 | 0 | 1 | 0 | 0 | 0 | 0 | 1 | 1 | 1 |
| Lrtm1  | 0 | 0 | 0 | 0 | 1 | 0 | 0 | 0 | 0 | 1 | 1 | 1 |

|          |   |   |   |   |   |   |   |   |   |   |   |   |
|----------|---|---|---|---|---|---|---|---|---|---|---|---|
| Lsm12    | 0 | 0 | 0 | 0 | 1 | 0 | 0 | 0 | 0 | 1 | 1 | 1 |
| Ltbp1    | 0 | 0 | 0 | 0 | 1 | 0 | 0 | 0 | 0 | 1 | 1 | 1 |
| Ltbp4    | 0 | 0 | 0 | 0 | 1 | 0 | 0 | 0 | 0 | 1 | 1 | 1 |
| Lurap1   | 0 | 0 | 0 | 0 | 1 | 0 | 0 | 0 | 0 | 1 | 1 | 1 |
| Luzp1    | 0 | 0 | 0 | 0 | 1 | 0 | 0 | 0 | 0 | 1 | 1 | 1 |
| Ly6g     | 0 | 0 | 0 | 0 | 1 | 0 | 0 | 0 | 0 | 1 | 1 | 1 |
| Ly9      | 0 | 0 | 0 | 0 | 1 | 0 | 0 | 0 | 0 | 1 | 1 | 1 |
| Lyar     | 0 | 0 | 0 | 0 | 1 | 0 | 0 | 0 | 0 | 1 | 1 | 1 |
| Lysmd4   | 0 | 0 | 0 | 0 | 1 | 0 | 0 | 0 | 0 | 1 | 1 | 1 |
| Macc1    | 0 | 0 | 0 | 0 | 1 | 0 | 0 | 0 | 0 | 1 | 1 | 1 |
| Macf1    | 0 | 0 | 0 | 0 | 1 | 0 | 0 | 0 | 0 | 1 | 1 | 1 |
| Madd     | 0 | 0 | 0 | 0 | 1 | 0 | 0 | 0 | 0 | 1 | 1 | 1 |
| Magi1    | 0 | 0 | 0 | 0 | 1 | 0 | 0 | 0 | 0 | 1 | 1 | 1 |
| Magi2    | 0 | 0 | 0 | 0 | 1 | 0 | 0 | 0 | 0 | 1 | 1 | 1 |
| Maip1    | 0 | 0 | 0 | 0 | 0 | 0 | 0 | 1 | 0 | 1 | 1 | 1 |
| Malt1    | 0 | 0 | 0 | 0 | 1 | 0 | 0 | 0 | 0 | 1 | 1 | 1 |
| Maml2    | 0 | 0 | 0 | 0 | 1 | 0 | 0 | 0 | 0 | 1 | 1 | 1 |
| Mamstr   | 0 | 0 | 0 | 0 | 1 | 0 | 0 | 0 | 0 | 1 | 1 | 1 |
| Man1a    | 0 | 0 | 0 | 0 | 0 | 1 | 0 | 0 | 0 | 1 | 1 | 1 |
| Man2a2   | 0 | 0 | 0 | 0 | 1 | 0 | 0 | 0 | 0 | 1 | 1 | 1 |
| Man2b2   | 0 | 0 | 0 | 0 | 1 | 0 | 0 | 0 | 0 | 1 | 1 | 1 |
| Map1a    | 0 | 0 | 0 | 0 | 1 | 0 | 0 | 0 | 0 | 1 | 1 | 1 |
| Map2     | 0 | 0 | 0 | 0 | 1 | 0 | 0 | 0 | 0 | 1 | 1 | 1 |
| Map2k1   | 0 | 0 | 0 | 0 | 1 | 0 | 0 | 0 | 0 | 1 | 1 | 1 |
| Map3k10  | 0 | 0 | 0 | 0 | 0 | 1 | 0 | 0 | 0 | 1 | 1 | 1 |
| Map3k11  | 0 | 0 | 0 | 0 | 1 | 0 | 0 | 0 | 0 | 1 | 1 | 1 |
| Map3k15  | 0 | 0 | 0 | 0 | 0 | 1 | 0 | 0 | 0 | 1 | 1 | 1 |
| Map4k2   | 0 | 0 | 0 | 0 | 0 | 0 | 0 | 1 | 0 | 1 | 1 | 1 |
| Map4k5   | 0 | 0 | 0 | 0 | 1 | 0 | 0 | 0 | 0 | 1 | 1 | 1 |
| Mapk9    | 0 | 0 | 0 | 0 | 1 | 0 | 0 | 0 | 0 | 1 | 1 | 1 |
| March10  | 0 | 0 | 0 | 0 | 1 | 0 | 0 | 0 | 0 | 1 | 1 | 1 |
| March6   | 0 | 0 | 0 | 0 | 1 | 0 | 0 | 0 | 0 | 1 | 1 | 1 |
| Marcksl1 | 0 | 0 | 0 | 0 | 1 | 0 | 0 | 0 | 0 | 1 | 1 | 1 |

|         |   |   |   |   |   |   |   |   |   |   |   |   |
|---------|---|---|---|---|---|---|---|---|---|---|---|---|
| Marf1   | 0 | 0 | 0 | 0 | 1 | 0 | 0 | 0 | 0 | 1 | 1 | 1 |
| Mark2   | 0 | 0 | 0 | 0 | 1 | 0 | 0 | 0 | 0 | 1 | 1 | 1 |
| Mars2   | 0 | 0 | 0 | 0 | 1 | 0 | 0 | 0 | 0 | 1 | 1 | 1 |
| Mast1   | 0 | 0 | 0 | 0 | 0 | 1 | 0 | 0 | 0 | 1 | 1 | 1 |
| Mat1a   | 0 | 0 | 0 | 0 | 1 | 0 | 0 | 0 | 0 | 1 | 1 | 1 |
| Matr3   | 0 | 0 | 0 | 0 | 1 | 0 | 0 | 0 | 0 | 1 | 1 | 1 |
| Mb21d2  | 0 | 1 | 0 | 0 | 0 | 0 | 0 | 0 | 0 | 1 | 1 | 1 |
| Mbd6    | 0 | 0 | 0 | 0 | 1 | 0 | 0 | 0 | 0 | 1 | 1 | 1 |
| Mboat1  | 0 | 0 | 0 | 0 | 1 | 0 | 0 | 0 | 0 | 1 | 1 | 1 |
| Mccc1   | 0 | 0 | 0 | 0 | 1 | 0 | 0 | 0 | 0 | 1 | 1 | 1 |
| Mchr1   | 0 | 0 | 0 | 0 | 1 | 0 | 0 | 0 | 0 | 1 | 1 | 1 |
| Mcidas  | 0 | 0 | 0 | 0 | 1 | 0 | 0 | 0 | 0 | 1 | 1 | 1 |
| Mcm4    | 0 | 0 | 0 | 0 | 1 | 0 | 0 | 0 | 0 | 1 | 1 | 1 |
| Mcmbp   | 0 | 0 | 0 | 0 | 1 | 0 | 0 | 0 | 0 | 1 | 1 | 1 |
| Mdga2   | 0 | 0 | 0 | 0 | 1 | 0 | 0 | 0 | 0 | 1 | 1 | 1 |
| Mdp1    | 0 | 0 | 0 | 0 | 1 | 0 | 0 | 0 | 0 | 1 | 1 | 1 |
| Med16   | 0 | 0 | 0 | 0 | 1 | 0 | 0 | 0 | 0 | 1 | 1 | 1 |
| Med18   | 0 | 0 | 0 | 0 | 1 | 0 | 0 | 0 | 0 | 1 | 1 | 1 |
| Med6    | 0 | 0 | 0 | 0 | 1 | 0 | 0 | 0 | 0 | 1 | 1 | 1 |
| Megf6   | 0 | 0 | 0 | 0 | 1 | 0 | 0 | 0 | 0 | 1 | 1 | 1 |
| Men1    | 0 | 0 | 0 | 0 | 1 | 0 | 0 | 0 | 0 | 1 | 1 | 1 |
| Mettl17 | 0 | 0 | 0 | 0 | 1 | 0 | 0 | 0 | 0 | 1 | 1 | 1 |
| Mfsd13b | 0 | 0 | 0 | 0 | 1 | 0 | 0 | 0 | 0 | 1 | 1 | 1 |
| Mgat2   | 0 | 0 | 0 | 0 | 1 | 0 | 0 | 0 | 0 | 1 | 1 | 1 |
| Mgat4b  | 0 | 0 | 0 | 0 | 1 | 0 | 0 | 0 | 0 | 1 | 1 | 1 |
| Mgll    | 0 | 0 | 0 | 0 | 1 | 0 | 0 | 0 | 0 | 1 | 1 | 1 |
| Mgst2   | 0 | 0 | 0 | 0 | 1 | 0 | 0 | 0 | 0 | 1 | 1 | 1 |
| Micall2 | 0 | 0 | 0 | 0 | 1 | 0 | 0 | 0 | 0 | 1 | 1 | 1 |
| Mier1   | 0 | 0 | 0 | 0 | 1 | 0 | 0 | 0 | 0 | 1 | 1 | 1 |
| Mipep   | 0 | 0 | 0 | 0 | 1 | 0 | 0 | 0 | 0 | 1 | 1 | 1 |
| Mipol1  | 0 | 0 | 0 | 0 | 1 | 0 | 0 | 0 | 0 | 1 | 1 | 1 |
| Mitf    | 0 | 0 | 0 | 0 | 1 | 0 | 0 | 0 | 0 | 1 | 1 | 1 |
| Mkks    | 0 | 0 | 0 | 0 | 1 | 0 | 0 | 0 | 0 | 1 | 1 | 1 |

|          |   |   |   |   |   |   |   |   |   |   |   |   |
|----------|---|---|---|---|---|---|---|---|---|---|---|---|
| Mknk1    | 0 | 0 | 0 | 0 | 1 | 0 | 0 | 0 | 0 | 1 | 1 | 1 |
| Mlip     | 0 | 0 | 0 | 0 | 0 | 0 | 0 | 1 | 0 | 1 | 1 | 1 |
| Mmp1b    | 0 | 0 | 0 | 0 | 1 | 0 | 0 | 0 | 0 | 1 | 1 | 1 |
| Mogs     | 0 | 0 | 0 | 0 | 1 | 0 | 0 | 0 | 0 | 1 | 1 | 1 |
| Mok      | 0 | 0 | 0 | 0 | 0 | 0 | 0 | 1 | 0 | 1 | 1 | 1 |
| Morc2a   | 0 | 0 | 0 | 0 | 1 | 0 | 0 | 0 | 0 | 1 | 1 | 1 |
| Morc3    | 0 | 0 | 0 | 0 | 1 | 0 | 0 | 0 | 0 | 1 | 1 | 1 |
| Moxd2    | 0 | 0 | 0 | 0 | 1 | 0 | 0 | 0 | 0 | 1 | 1 | 1 |
| Mphosph9 | 0 | 0 | 0 | 0 | 1 | 0 | 0 | 0 | 0 | 1 | 1 | 1 |
| Mrgpra4  | 0 | 0 | 0 | 0 | 0 | 1 | 0 | 0 | 0 | 1 | 1 | 1 |
| Mrgprb1  | 0 | 1 | 0 | 0 | 0 | 0 | 0 | 0 | 0 | 1 | 1 | 1 |
| Mrgprb4  | 0 | 0 | 0 | 0 | 1 | 0 | 0 | 0 | 0 | 1 | 1 | 1 |
| Mrpl39   | 0 | 0 | 0 | 0 | 1 | 0 | 0 | 0 | 0 | 1 | 1 | 1 |
| Mrpl45   | 0 | 0 | 0 | 0 | 1 | 0 | 0 | 0 | 0 | 1 | 1 | 1 |
| Mrpl47   | 0 | 0 | 0 | 0 | 1 | 0 | 0 | 0 | 0 | 1 | 1 | 1 |
| Mrpl48   | 0 | 0 | 0 | 0 | 1 | 0 | 0 | 0 | 0 | 1 | 1 | 1 |
| Mrps12   | 0 | 0 | 0 | 0 | 1 | 0 | 0 | 0 | 0 | 1 | 1 | 1 |
| Mrps22   | 0 | 0 | 0 | 0 | 1 | 0 | 0 | 0 | 0 | 1 | 1 | 1 |
| Mrps30   | 0 | 0 | 0 | 0 | 1 | 0 | 0 | 0 | 0 | 1 | 1 | 1 |
| Mrps34   | 0 | 0 | 0 | 0 | 1 | 0 | 0 | 0 | 0 | 1 | 1 | 1 |
| Ms4a1    | 0 | 0 | 0 | 0 | 1 | 0 | 0 | 0 | 0 | 1 | 1 | 1 |
| Ms4a14   | 0 | 0 | 0 | 0 | 1 | 0 | 0 | 0 | 0 | 1 | 1 | 1 |
| Ms4a5    | 0 | 0 | 0 | 0 | 1 | 0 | 0 | 0 | 0 | 1 | 1 | 1 |
| Ms4a7    | 0 | 0 | 0 | 0 | 1 | 0 | 0 | 0 | 0 | 1 | 1 | 1 |
| Msh4     | 0 | 0 | 0 | 0 | 1 | 0 | 0 | 0 | 0 | 1 | 1 | 1 |
| Msln     | 0 | 0 | 0 | 0 | 0 | 1 | 0 | 0 | 0 | 1 | 1 | 1 |
| Msra     | 0 | 0 | 0 | 0 | 1 | 0 | 0 | 0 | 0 | 1 | 1 | 1 |
| Msx3     | 0 | 0 | 0 | 0 | 1 | 0 | 0 | 0 | 0 | 1 | 1 | 1 |
| Mta2     | 0 | 0 | 0 | 0 | 1 | 0 | 0 | 0 | 0 | 1 | 1 | 1 |
| Mtcl1    | 0 | 0 | 0 | 0 | 1 | 0 | 0 | 0 | 0 | 1 | 1 | 1 |
| Mterf1b  | 0 | 0 | 0 | 0 | 1 | 0 | 0 | 0 | 0 | 1 | 1 | 1 |
| Mtg1     | 0 | 0 | 0 | 0 | 1 | 0 | 0 | 0 | 0 | 1 | 1 | 1 |
| Mthfd1   | 0 | 0 | 0 | 0 | 1 | 0 | 0 | 0 | 0 | 1 | 1 | 1 |

|         |   |   |   |   |   |   |   |   |   |   |   |   |
|---------|---|---|---|---|---|---|---|---|---|---|---|---|
| Mthfd2l | 0 | 0 | 0 | 0 | 1 | 0 | 0 | 0 | 0 | 1 | 1 | 1 |
| Mtmr11  | 0 | 0 | 0 | 0 | 1 | 0 | 0 | 0 | 0 | 1 | 1 | 1 |
| Mul1    | 0 | 0 | 0 | 0 | 1 | 0 | 0 | 0 | 0 | 1 | 1 | 1 |
| Mup3    | 0 | 0 | 0 | 0 | 1 | 0 | 0 | 0 | 0 | 1 | 1 | 1 |
| Musk    | 0 | 0 | 0 | 0 | 1 | 0 | 0 | 0 | 0 | 1 | 1 | 1 |
| Mybl1   | 0 | 0 | 0 | 0 | 1 | 0 | 0 | 0 | 0 | 1 | 1 | 1 |
| Myh1    | 0 | 0 | 0 | 0 | 1 | 0 | 0 | 0 | 0 | 1 | 1 | 1 |
| Myh4    | 0 | 0 | 0 | 0 | 1 | 0 | 0 | 0 | 0 | 1 | 1 | 1 |
| Myh7b   | 0 | 0 | 0 | 0 | 1 | 0 | 0 | 0 | 0 | 1 | 1 | 1 |
| Myh8    | 0 | 0 | 0 | 0 | 1 | 0 | 0 | 0 | 0 | 1 | 1 | 1 |
| Mylk4   | 0 | 0 | 0 | 0 | 1 | 0 | 0 | 0 | 0 | 1 | 1 | 1 |
| Mynn    | 0 | 0 | 0 | 0 | 1 | 0 | 0 | 0 | 0 | 1 | 1 | 1 |
| Myo15   | 0 | 0 | 0 | 0 | 1 | 0 | 0 | 0 | 0 | 1 | 1 | 1 |
| Myo18a  | 0 | 0 | 0 | 0 | 1 | 0 | 0 | 0 | 0 | 1 | 1 | 1 |
| Myo5a   | 0 | 0 | 0 | 0 | 1 | 0 | 0 | 0 | 0 | 1 | 1 | 1 |
| Myo5b   | 0 | 1 | 0 | 0 | 0 | 0 | 0 | 0 | 0 | 1 | 1 | 1 |
| Myo7a   | 0 | 0 | 0 | 0 | 1 | 0 | 0 | 0 | 0 | 1 | 1 | 1 |
| Myog    | 0 | 0 | 0 | 0 | 1 | 0 | 0 | 0 | 0 | 1 | 1 | 1 |
| Myom1   | 0 | 0 | 0 | 0 | 1 | 0 | 0 | 0 | 0 | 1 | 1 | 1 |
| Myrf    | 0 | 0 | 0 | 0 | 1 | 0 | 0 | 0 | 0 | 1 | 1 | 1 |
| N4bp2l2 | 0 | 0 | 0 | 0 | 1 | 0 | 0 | 0 | 0 | 1 | 1 | 1 |
| Naa15   | 0 | 0 | 0 | 0 | 1 | 0 | 0 | 0 | 0 | 1 | 1 | 1 |
| Naaa    | 0 | 0 | 0 | 0 | 1 | 0 | 0 | 0 | 0 | 1 | 1 | 1 |
| Naca    | 0 | 0 | 0 | 0 | 1 | 0 | 0 | 0 | 0 | 1 | 1 | 1 |
| Nacc1   | 0 | 0 | 0 | 0 | 1 | 0 | 0 | 0 | 0 | 1 | 1 | 1 |
| Nadk2   | 0 | 0 | 0 | 0 | 1 | 0 | 0 | 0 | 0 | 1 | 1 | 1 |
| Nags    | 0 | 0 | 0 | 0 | 1 | 0 | 0 | 0 | 0 | 1 | 1 | 1 |
| Nalcn   | 0 | 0 | 0 | 0 | 1 | 0 | 0 | 0 | 0 | 1 | 1 | 1 |
| Nav3    | 0 | 0 | 0 | 0 | 1 | 0 | 0 | 0 | 0 | 1 | 1 | 1 |
| Nbas    | 0 | 0 | 0 | 0 | 1 | 0 | 0 | 0 | 0 | 1 | 1 | 1 |
| Nbea    | 0 | 0 | 0 | 0 | 1 | 0 | 0 | 0 | 0 | 1 | 1 | 1 |
| Nbr1    | 0 | 0 | 0 | 0 | 0 | 0 | 0 | 1 | 0 | 1 | 1 | 1 |
| Ncapd2  | 0 | 0 | 0 | 0 | 1 | 0 | 0 | 0 | 0 | 1 | 1 | 1 |

|         |   |   |   |   |   |   |   |   |   |   |   |   |
|---------|---|---|---|---|---|---|---|---|---|---|---|---|
| Ncapd3  | 0 | 0 | 0 | 0 | 1 | 0 | 0 | 0 | 0 | 1 | 1 | 1 |
| Ncapg   | 0 | 0 | 0 | 0 | 1 | 0 | 0 | 0 | 0 | 1 | 1 | 1 |
| Ncbp2   | 0 | 0 | 0 | 0 | 1 | 0 | 0 | 0 | 0 | 1 | 1 | 1 |
| Ncoa1   | 0 | 0 | 0 | 0 | 1 | 0 | 0 | 0 | 0 | 1 | 1 | 1 |
| Ncor2   | 0 | 0 | 0 | 0 | 1 | 0 | 0 | 0 | 0 | 1 | 1 | 1 |
| Ncstn   | 0 | 0 | 0 | 0 | 1 | 0 | 0 | 0 | 0 | 1 | 1 | 1 |
| Ndrg1   | 0 | 0 | 0 | 0 | 1 | 0 | 0 | 0 | 0 | 1 | 1 | 1 |
| Ndrg2   | 0 | 0 | 0 | 0 | 1 | 0 | 0 | 0 | 0 | 1 | 1 | 1 |
| Ndufa10 | 0 | 0 | 0 | 0 | 1 | 0 | 0 | 0 | 0 | 1 | 1 | 1 |
| Nedd9   | 0 | 0 | 0 | 0 | 1 | 0 | 0 | 0 | 0 | 1 | 1 | 1 |
| Nefh    | 0 | 0 | 0 | 0 | 1 | 0 | 0 | 0 | 0 | 1 | 1 | 1 |
| Nek5    | 0 | 0 | 0 | 0 | 1 | 0 | 0 | 0 | 0 | 1 | 1 | 1 |
| Nelfb   | 0 | 0 | 0 | 0 | 1 | 0 | 0 | 0 | 0 | 1 | 1 | 1 |
| Nell1   | 0 | 0 | 0 | 0 | 1 | 0 | 0 | 0 | 0 | 1 | 1 | 1 |
| Neo1    | 0 | 0 | 0 | 0 | 1 | 0 | 0 | 0 | 0 | 1 | 1 | 1 |
| Nes     | 0 | 0 | 0 | 0 | 1 | 0 | 0 | 0 | 0 | 1 | 1 | 1 |
| Net1    | 0 | 0 | 0 | 0 | 0 | 0 | 0 | 1 | 0 | 1 | 1 | 1 |
| Neurl3  | 0 | 0 | 0 | 0 | 1 | 0 | 0 | 0 | 0 | 1 | 1 | 1 |
| Neurog3 | 0 | 0 | 0 | 0 | 1 | 0 | 0 | 0 | 0 | 1 | 1 | 1 |
| Nexmif  | 0 | 0 | 0 | 0 | 1 | 0 | 0 | 0 | 0 | 1 | 1 | 1 |
| Nf1     | 0 | 0 | 0 | 0 | 0 | 1 | 0 | 0 | 0 | 1 | 1 | 1 |
| Ngly1   | 0 | 0 | 0 | 0 | 1 | 0 | 0 | 0 | 0 | 1 | 1 | 1 |
| Nhej1   | 0 | 0 | 0 | 0 | 1 | 0 | 0 | 0 | 0 | 1 | 1 | 1 |
| Nhlrc3  | 0 | 0 | 0 | 0 | 1 | 0 | 0 | 0 | 0 | 1 | 1 | 1 |
| Nhsl2   | 0 | 0 | 0 | 0 | 1 | 0 | 0 | 0 | 0 | 1 | 1 | 1 |
| Nid2    | 0 | 0 | 0 | 0 | 1 | 0 | 0 | 0 | 0 | 1 | 1 | 1 |
| Nipal1  | 0 | 0 | 0 | 0 | 1 | 0 | 0 | 0 | 0 | 1 | 1 | 1 |
| Nlgn1   | 0 | 0 | 0 | 0 | 1 | 0 | 0 | 0 | 0 | 1 | 1 | 1 |
| Nlrp4c  | 0 | 0 | 0 | 0 | 1 | 0 | 0 | 0 | 0 | 1 | 1 | 1 |
| Nlrp5   | 0 | 0 | 0 | 0 | 1 | 0 | 0 | 0 | 0 | 1 | 1 | 1 |
| Nme5    | 0 | 0 | 0 | 0 | 1 | 0 | 0 | 0 | 0 | 1 | 1 | 1 |
| Nmt2    | 0 | 0 | 0 | 0 | 1 | 0 | 0 | 0 | 0 | 1 | 1 | 1 |
| Nol8    | 0 | 0 | 0 | 0 | 1 | 0 | 0 | 0 | 0 | 1 | 1 | 1 |

|        |   |   |   |   |   |   |   |   |   |   |   |   |
|--------|---|---|---|---|---|---|---|---|---|---|---|---|
| Nolc1  | 0 | 0 | 0 | 0 | 1 | 0 | 0 | 0 | 0 | 1 | 1 | 1 |
| Nos2   | 0 | 0 | 0 | 0 | 0 | 0 | 0 | 1 | 0 | 1 | 1 | 1 |
| Notch1 | 0 | 0 | 0 | 0 | 1 | 0 | 0 | 0 | 0 | 1 | 1 | 1 |
| Notch3 | 0 | 0 | 0 | 0 | 1 | 0 | 0 | 0 | 0 | 1 | 1 | 1 |
| Notch4 | 0 | 0 | 0 | 0 | 1 | 0 | 0 | 0 | 0 | 1 | 1 | 1 |
| Nova1  | 0 | 0 | 0 | 0 | 1 | 0 | 0 | 0 | 0 | 1 | 1 | 1 |
| Npy5r  | 0 | 0 | 0 | 0 | 1 | 0 | 0 | 0 | 0 | 1 | 1 | 1 |
| Nr1d2  | 0 | 0 | 0 | 0 | 1 | 0 | 0 | 0 | 0 | 1 | 1 | 1 |
| Nr4a2  | 0 | 0 | 0 | 0 | 1 | 0 | 0 | 0 | 0 | 1 | 1 | 1 |
| Nr4a3  | 0 | 0 | 0 | 0 | 1 | 0 | 0 | 0 | 0 | 1 | 1 | 1 |
| Nrde2  | 0 | 0 | 0 | 0 | 1 | 0 | 0 | 0 | 0 | 1 | 1 | 1 |
| Nrp2   | 0 | 0 | 0 | 0 | 1 | 0 | 0 | 0 | 0 | 1 | 1 | 1 |
| Nsun4  | 0 | 0 | 0 | 0 | 1 | 0 | 0 | 0 | 0 | 1 | 1 | 1 |
| Nsun5  | 0 | 0 | 0 | 0 | 1 | 0 | 0 | 0 | 0 | 1 | 1 | 1 |
| Nt5c1b | 0 | 0 | 0 | 0 | 1 | 0 | 0 | 0 | 0 | 1 | 1 | 1 |
| Nt5c3  | 0 | 0 | 0 | 0 | 1 | 0 | 0 | 0 | 0 | 1 | 1 | 1 |
| Ntm    | 0 | 0 | 0 | 0 | 1 | 0 | 0 | 0 | 0 | 1 | 1 | 1 |
| Nudcd2 | 0 | 0 | 0 | 0 | 1 | 0 | 0 | 0 | 0 | 1 | 1 | 1 |
| Nudt12 | 0 | 0 | 0 | 0 | 1 | 0 | 0 | 0 | 0 | 1 | 1 | 1 |
| Nuf2   | 0 | 0 | 0 | 0 | 1 | 0 | 0 | 0 | 0 | 1 | 1 | 1 |
| Nup160 | 0 | 0 | 0 | 0 | 1 | 0 | 0 | 0 | 0 | 1 | 1 | 1 |
| Nup214 | 0 | 0 | 0 | 0 | 1 | 0 | 0 | 0 | 0 | 1 | 1 | 1 |
| Nup93  | 0 | 0 | 0 | 0 | 1 | 0 | 0 | 0 | 0 | 1 | 1 | 1 |
| Nutm1  | 0 | 0 | 0 | 0 | 1 | 0 | 0 | 0 | 0 | 1 | 1 | 1 |
| Nvl    | 0 | 0 | 0 | 0 | 1 | 0 | 0 | 0 | 0 | 1 | 1 | 1 |
| Nxpe2  | 0 | 0 | 0 | 0 | 1 | 0 | 0 | 0 | 0 | 1 | 1 | 1 |
| Nxpe5  | 0 | 0 | 0 | 0 | 1 | 0 | 0 | 0 | 0 | 1 | 1 | 1 |
| Nxt2   | 0 | 0 | 0 | 0 | 1 | 0 | 0 | 0 | 0 | 1 | 1 | 1 |
| Nyap2  | 0 | 0 | 0 | 0 | 0 | 1 | 0 | 0 | 0 | 1 | 1 | 1 |
| Nynrin | 0 | 0 | 0 | 0 | 1 | 0 | 0 | 0 | 0 | 1 | 1 | 1 |
| Ofd1   | 0 | 0 | 0 | 0 | 0 | 1 | 0 | 0 | 0 | 1 | 1 | 1 |
| Ogdhl  | 0 | 0 | 0 | 0 | 1 | 0 | 0 | 0 | 0 | 1 | 1 | 1 |
| Ogfr   | 0 | 0 | 0 | 0 | 1 | 0 | 0 | 0 | 0 | 1 | 1 | 1 |

|            |   |   |   |   |   |   |   |   |   |   |   |   |
|------------|---|---|---|---|---|---|---|---|---|---|---|---|
| Oit3       | 0 | 0 | 0 | 0 | 0 | 0 | 0 | 1 | 0 | 1 | 1 | 1 |
| Olfr13     | 0 | 0 | 0 | 0 | 1 | 0 | 0 | 0 | 0 | 1 | 1 | 1 |
| Olfr1036   | 0 | 0 | 0 | 0 | 1 | 0 | 0 | 0 | 0 | 1 | 1 | 1 |
| Olfr1044   | 0 | 0 | 0 | 0 | 1 | 0 | 0 | 0 | 0 | 1 | 1 | 1 |
| Olfr105-ps | 0 | 0 | 0 | 0 | 1 | 0 | 0 | 0 | 0 | 1 | 1 | 1 |
| Olfr1093   | 0 | 0 | 0 | 0 | 0 | 1 | 0 | 0 | 0 | 1 | 1 | 1 |
| Olfr1141   | 0 | 0 | 0 | 0 | 1 | 0 | 0 | 0 | 0 | 1 | 1 | 1 |
| Olfr1154   | 0 | 0 | 0 | 0 | 1 | 0 | 0 | 0 | 0 | 1 | 1 | 1 |
| Olfr116    | 0 | 0 | 0 | 0 | 1 | 0 | 0 | 0 | 0 | 1 | 1 | 1 |
| Olfr1161   | 0 | 0 | 0 | 0 | 1 | 0 | 0 | 0 | 0 | 1 | 1 | 1 |
| Olfr1202   | 0 | 0 | 0 | 0 | 1 | 0 | 0 | 0 | 0 | 1 | 1 | 1 |
| Olfr1233   | 0 | 0 | 0 | 0 | 1 | 0 | 0 | 0 | 0 | 1 | 1 | 1 |
| Olfr1247   | 0 | 0 | 0 | 0 | 1 | 0 | 0 | 0 | 0 | 1 | 1 | 1 |
| Olfr1260   | 0 | 0 | 0 | 0 | 1 | 0 | 0 | 0 | 0 | 1 | 1 | 1 |
| Olfr1263   | 0 | 0 | 0 | 0 | 1 | 0 | 0 | 0 | 0 | 1 | 1 | 1 |
| Olfr1264   | 0 | 0 | 1 | 0 | 0 | 0 | 0 | 0 | 0 | 1 | 1 | 1 |
| Olfr1269   | 0 | 0 | 0 | 0 | 1 | 0 | 0 | 0 | 0 | 1 | 1 | 1 |
| Olfr1283   | 0 | 0 | 0 | 0 | 1 | 0 | 0 | 0 | 0 | 1 | 1 | 1 |
| Olfr1288   | 0 | 0 | 0 | 0 | 1 | 0 | 0 | 0 | 0 | 1 | 1 | 1 |
| Olfr1290   | 0 | 0 | 0 | 0 | 0 | 1 | 0 | 0 | 0 | 1 | 1 | 1 |
| Olfr1338   | 0 | 0 | 0 | 0 | 1 | 0 | 0 | 0 | 0 | 1 | 1 | 1 |
| Olfr1368   | 0 | 0 | 0 | 0 | 1 | 0 | 0 | 0 | 0 | 1 | 1 | 1 |
| Olfr1389   | 0 | 0 | 0 | 0 | 1 | 0 | 0 | 0 | 0 | 1 | 1 | 1 |
| Olfr140    | 0 | 0 | 0 | 0 | 1 | 0 | 0 | 0 | 0 | 1 | 1 | 1 |
| Olfr1413   | 0 | 0 | 0 | 0 | 1 | 0 | 0 | 0 | 0 | 1 | 1 | 1 |
| Olfr1419   | 0 | 0 | 0 | 0 | 1 | 0 | 0 | 0 | 0 | 1 | 1 | 1 |
| Olfr1426   | 0 | 0 | 0 | 0 | 1 | 0 | 0 | 0 | 0 | 1 | 1 | 1 |
| Olfr1434   | 0 | 0 | 0 | 0 | 1 | 0 | 0 | 0 | 0 | 1 | 1 | 1 |
| Olfr1442   | 0 | 0 | 0 | 0 | 1 | 0 | 0 | 0 | 0 | 1 | 1 | 1 |
| Olfr1445   | 0 | 0 | 0 | 0 | 1 | 0 | 0 | 0 | 0 | 1 | 1 | 1 |
| Olfr1471   | 0 | 0 | 0 | 0 | 1 | 0 | 0 | 0 | 0 | 1 | 1 | 1 |
| Olfr150    | 0 | 0 | 0 | 0 | 1 | 0 | 0 | 0 | 0 | 1 | 1 | 1 |
| Olfr151    | 0 | 0 | 0 | 0 | 1 | 0 | 0 | 0 | 0 | 1 | 1 | 1 |



|            |   |   |   |   |   |   |   |   |   |   |   |   |
|------------|---|---|---|---|---|---|---|---|---|---|---|---|
| Olfr154    | 0 | 0 | 0 | 0 | 1 | 0 | 0 | 0 | 0 | 1 | 1 | 1 |
| Olfr164    | 0 | 0 | 0 | 0 | 1 | 0 | 0 | 0 | 0 | 1 | 1 | 1 |
| Olfr165    | 0 | 0 | 0 | 0 | 1 | 0 | 0 | 0 | 0 | 1 | 1 | 1 |
| Olfr195    | 0 | 0 | 0 | 0 | 1 | 0 | 0 | 0 | 0 | 1 | 1 | 1 |
| Olfr229    | 0 | 0 | 0 | 0 | 1 | 0 | 0 | 0 | 0 | 1 | 1 | 1 |
| Olfr239    | 0 | 0 | 0 | 0 | 1 | 0 | 0 | 0 | 0 | 1 | 1 | 1 |
| Olfr273    | 0 | 0 | 0 | 0 | 1 | 0 | 0 | 0 | 0 | 1 | 1 | 1 |
| Olfr275    | 0 | 0 | 0 | 0 | 1 | 0 | 0 | 0 | 0 | 1 | 1 | 1 |
| Olfr282    | 0 | 0 | 0 | 0 | 1 | 0 | 0 | 0 | 0 | 1 | 1 | 1 |
| Olfr303    | 0 | 0 | 0 | 0 | 1 | 0 | 0 | 0 | 0 | 1 | 1 | 1 |
| Olfr328    | 0 | 0 | 0 | 0 | 1 | 0 | 0 | 0 | 0 | 1 | 1 | 1 |
| Olfr329-ps | 0 | 0 | 0 | 0 | 1 | 0 | 0 | 0 | 0 | 1 | 1 | 1 |
| Olfr331    | 0 | 0 | 0 | 0 | 1 | 0 | 0 | 0 | 0 | 1 | 1 | 1 |
| Olfr353    | 0 | 0 | 0 | 0 | 1 | 0 | 0 | 0 | 0 | 1 | 1 | 1 |
| Olfr358    | 0 | 0 | 0 | 0 | 1 | 0 | 0 | 0 | 0 | 1 | 1 | 1 |
| Olfr361    | 0 | 0 | 0 | 0 | 1 | 0 | 0 | 0 | 0 | 1 | 1 | 1 |
| Olfr389    | 0 | 0 | 0 | 0 | 1 | 0 | 0 | 0 | 0 | 1 | 1 | 1 |
| Olfr450    | 0 | 0 | 0 | 0 | 1 | 0 | 0 | 0 | 0 | 1 | 1 | 1 |
| Olfr461    | 0 | 0 | 0 | 0 | 1 | 0 | 0 | 0 | 0 | 1 | 1 | 1 |
| Olfr467    | 0 | 0 | 0 | 0 | 1 | 0 | 0 | 0 | 0 | 1 | 1 | 1 |
| Olfr469    | 0 | 0 | 0 | 0 | 1 | 0 | 0 | 0 | 0 | 1 | 1 | 1 |
| Olfr477    | 0 | 0 | 0 | 0 | 1 | 0 | 0 | 0 | 0 | 1 | 1 | 1 |
| Olfr48     | 0 | 0 | 0 | 0 | 1 | 0 | 0 | 0 | 0 | 1 | 1 | 1 |
| Olfr507    | 0 | 0 | 0 | 0 | 1 | 0 | 0 | 0 | 0 | 1 | 1 | 1 |
| Olfr516    | 0 | 0 | 0 | 0 | 1 | 0 | 0 | 0 | 0 | 1 | 1 | 1 |
| Olfr525    | 0 | 0 | 0 | 0 | 0 | 1 | 0 | 0 | 0 | 1 | 1 | 1 |
| Olfr561    | 0 | 0 | 0 | 0 | 1 | 0 | 0 | 0 | 0 | 1 | 1 | 1 |
| Olfr564    | 0 | 0 | 0 | 0 | 1 | 0 | 0 | 0 | 0 | 1 | 1 | 1 |
| Olfr575    | 0 | 0 | 0 | 0 | 1 | 0 | 0 | 0 | 0 | 1 | 1 | 1 |
| Olfr576    | 0 | 0 | 0 | 0 | 1 | 0 | 0 | 0 | 0 | 1 | 1 | 1 |
| Olfr589    | 0 | 0 | 0 | 0 | 1 | 0 | 0 | 0 | 0 | 1 | 1 | 1 |
| Olfr594    | 0 | 0 | 0 | 0 | 0 | 1 | 0 | 0 | 0 | 1 | 1 | 1 |
| Olfr597    | 0 | 0 | 0 | 0 | 1 | 0 | 0 | 0 | 0 | 1 | 1 | 1 |

|         |   |   |   |   |   |   |   |   |   |   |   |   |
|---------|---|---|---|---|---|---|---|---|---|---|---|---|
| Olfr61  | 0 | 0 | 0 | 0 | 1 | 0 | 0 | 0 | 0 | 1 | 1 | 1 |
| Olfr619 | 0 | 0 | 0 | 0 | 1 | 0 | 0 | 0 | 0 | 1 | 1 | 1 |
| Olfr628 | 0 | 0 | 0 | 0 | 1 | 0 | 0 | 0 | 0 | 1 | 1 | 1 |
| Olfr675 | 0 | 0 | 0 | 0 | 1 | 0 | 0 | 0 | 0 | 1 | 1 | 1 |
| Olfr68  | 0 | 0 | 0 | 0 | 1 | 0 | 0 | 0 | 0 | 1 | 1 | 1 |
| Olfr688 | 0 | 0 | 0 | 0 | 1 | 0 | 0 | 0 | 0 | 1 | 1 | 1 |
| Olfr698 | 0 | 0 | 0 | 0 | 1 | 0 | 0 | 0 | 0 | 1 | 1 | 1 |
| Olfr727 | 0 | 0 | 0 | 0 | 1 | 0 | 0 | 0 | 0 | 1 | 1 | 1 |
| Olfr749 | 0 | 0 | 0 | 0 | 1 | 0 | 0 | 0 | 0 | 1 | 1 | 1 |
| Olfr8   | 0 | 0 | 0 | 0 | 1 | 0 | 0 | 0 | 0 | 1 | 1 | 1 |
| Olfr801 | 0 | 0 | 0 | 0 | 1 | 0 | 0 | 0 | 0 | 1 | 1 | 1 |
| Olfr806 | 0 | 0 | 0 | 0 | 1 | 0 | 0 | 0 | 0 | 1 | 1 | 1 |
| Olfr809 | 0 | 0 | 0 | 0 | 1 | 0 | 0 | 0 | 0 | 1 | 1 | 1 |
| Olfr822 | 0 | 0 | 0 | 0 | 1 | 0 | 0 | 0 | 0 | 1 | 1 | 1 |
| Olfr829 | 0 | 0 | 0 | 0 | 1 | 0 | 0 | 0 | 0 | 1 | 1 | 1 |
| Olfr90  | 0 | 0 | 0 | 0 | 1 | 0 | 0 | 0 | 0 | 1 | 1 | 1 |
| Olfr902 | 0 | 0 | 0 | 0 | 1 | 0 | 0 | 0 | 0 | 1 | 1 | 1 |
| Olfr908 | 0 | 0 | 0 | 0 | 1 | 0 | 0 | 0 | 0 | 1 | 1 | 1 |
| Olfr913 | 0 | 0 | 0 | 0 | 1 | 0 | 0 | 0 | 0 | 1 | 1 | 1 |
| Olfr926 | 0 | 0 | 0 | 0 | 1 | 0 | 0 | 0 | 0 | 1 | 1 | 1 |
| Olfr930 | 0 | 0 | 0 | 0 | 1 | 0 | 0 | 0 | 0 | 1 | 1 | 1 |
| Olfr945 | 0 | 0 | 0 | 0 | 1 | 0 | 0 | 0 | 0 | 1 | 1 | 1 |
| Olfr951 | 0 | 0 | 0 | 0 | 1 | 0 | 0 | 0 | 0 | 1 | 1 | 1 |
| Olfr992 | 0 | 0 | 0 | 0 | 1 | 0 | 0 | 0 | 0 | 1 | 1 | 1 |
| Orc1    | 0 | 0 | 0 | 0 | 1 | 0 | 0 | 0 | 0 | 1 | 1 | 1 |
| Osbp2   | 0 | 0 | 0 | 0 | 1 | 0 | 0 | 0 | 0 | 1 | 1 | 1 |
| Osbpl5  | 0 | 0 | 0 | 0 | 1 | 0 | 0 | 0 | 0 | 1 | 1 | 1 |
| Osbpl8  | 0 | 0 | 0 | 0 | 0 | 0 | 0 | 1 | 0 | 1 | 1 | 1 |
| Osbpl9  | 0 | 0 | 0 | 0 | 1 | 0 | 0 | 0 | 0 | 1 | 1 | 1 |
| Oser1   | 0 | 0 | 0 | 0 | 1 | 0 | 0 | 0 | 0 | 1 | 1 | 1 |
| Otop1   | 0 | 0 | 0 | 0 | 1 | 0 | 0 | 0 | 0 | 1 | 1 | 1 |
| Otud1   | 0 | 0 | 0 | 0 | 0 | 1 | 0 | 0 | 0 | 1 | 1 | 1 |
| Ovgp1   | 0 | 0 | 0 | 0 | 1 | 0 | 0 | 0 | 0 | 1 | 1 | 1 |

|         |   |   |   |   |   |   |   |   |   |   |   |   |
|---------|---|---|---|---|---|---|---|---|---|---|---|---|
| Ovol2   | 0 | 0 | 0 | 0 | 1 | 0 | 0 | 0 | 0 | 1 | 1 | 1 |
| P2rx6   | 0 | 0 | 0 | 0 | 1 | 0 | 0 | 0 | 0 | 1 | 1 | 1 |
| P3h2    | 0 | 0 | 0 | 0 | 1 | 0 | 0 | 0 | 0 | 1 | 1 | 1 |
| Pabpc1  | 0 | 0 | 0 | 0 | 0 | 1 | 0 | 0 | 0 | 1 | 1 | 1 |
| Pabpc1l | 0 | 0 | 0 | 0 | 1 | 0 | 0 | 0 | 0 | 1 | 1 | 1 |
| Pacs2   | 0 | 0 | 0 | 0 | 1 | 0 | 0 | 0 | 0 | 1 | 1 | 1 |
| Pak7    | 0 | 0 | 0 | 0 | 1 | 0 | 0 | 0 | 0 | 1 | 1 | 1 |
| Palld   | 0 | 0 | 0 | 0 | 1 | 0 | 0 | 0 | 0 | 1 | 1 | 1 |
| Pard3b  | 0 | 0 | 0 | 0 | 1 | 0 | 0 | 0 | 0 | 1 | 1 | 1 |
| Parp8   | 0 | 0 | 0 | 0 | 1 | 0 | 0 | 0 | 0 | 1 | 1 | 1 |
| Pate2   | 0 | 0 | 0 | 0 | 1 | 0 | 0 | 0 | 0 | 1 | 1 | 1 |
| Pax2    | 0 | 0 | 0 | 0 | 1 | 0 | 0 | 0 | 0 | 1 | 1 | 1 |
| Pbx3    | 0 | 0 | 0 | 0 | 1 | 0 | 0 | 0 | 0 | 1 | 1 | 1 |
| Pcdh10  | 0 | 0 | 0 | 0 | 1 | 0 | 0 | 0 | 0 | 1 | 1 | 1 |
| Pcdh8   | 0 | 0 | 0 | 0 | 1 | 0 | 0 | 0 | 0 | 1 | 1 | 1 |
| Pcdha3  | 0 | 0 | 0 | 0 | 1 | 0 | 0 | 0 | 0 | 1 | 1 | 1 |
| Pcdha6  | 0 | 0 | 0 | 0 | 1 | 0 | 0 | 0 | 0 | 1 | 1 | 1 |
| Pcdha7  | 0 | 0 | 0 | 0 | 1 | 0 | 0 | 0 | 0 | 1 | 1 | 1 |
| Pcdha9  | 0 | 0 | 0 | 0 | 1 | 0 | 0 | 0 | 0 | 1 | 1 | 1 |
| Pcdhac1 | 0 | 0 | 0 | 0 | 1 | 0 | 0 | 0 | 0 | 1 | 1 | 1 |
| Pcdhb10 | 0 | 0 | 0 | 0 | 1 | 0 | 0 | 0 | 0 | 1 | 1 | 1 |
| Pcdhb12 | 0 | 0 | 0 | 0 | 1 | 0 | 0 | 0 | 0 | 1 | 1 | 1 |
| Pcdhb13 | 0 | 0 | 0 | 0 | 1 | 0 | 0 | 0 | 0 | 1 | 1 | 1 |
| Pcdhb14 | 0 | 0 | 0 | 0 | 1 | 0 | 0 | 0 | 0 | 1 | 1 | 1 |
| Pcdhb22 | 0 | 0 | 0 | 0 | 1 | 0 | 0 | 0 | 0 | 1 | 1 | 1 |
| Pcdhb5  | 0 | 0 | 0 | 0 | 1 | 0 | 0 | 0 | 0 | 1 | 1 | 1 |
| Pcdhb6  | 0 | 0 | 0 | 0 | 1 | 0 | 0 | 0 | 0 | 1 | 1 | 1 |
| Pcdhb9  | 0 | 0 | 0 | 0 | 1 | 0 | 0 | 0 | 0 | 1 | 1 | 1 |
| Pcdhgb4 | 0 | 0 | 0 | 0 | 1 | 0 | 0 | 0 | 0 | 1 | 1 | 1 |
| Pcdhgb8 | 0 | 0 | 0 | 0 | 1 | 0 | 0 | 0 | 0 | 1 | 1 | 1 |
| Pcdhgc3 | 0 | 0 | 0 | 0 | 1 | 0 | 0 | 0 | 0 | 1 | 1 | 1 |
| Pcf11   | 0 | 0 | 0 | 0 | 1 | 0 | 0 | 0 | 0 | 1 | 1 | 1 |
| Pcif1   | 0 | 0 | 0 | 0 | 1 | 0 | 0 | 0 | 0 | 1 | 1 | 1 |

|         |   |   |   |   |   |   |   |   |   |   |   |   |
|---------|---|---|---|---|---|---|---|---|---|---|---|---|
| Pcnx    | 0 | 0 | 0 | 0 | 1 | 0 | 0 | 0 | 0 | 1 | 1 | 1 |
| Pcnx2   | 0 | 0 | 0 | 0 | 1 | 0 | 0 | 0 | 0 | 1 | 1 | 1 |
| Pcsk5   | 0 | 0 | 0 | 0 | 1 | 0 | 0 | 0 | 0 | 1 | 1 | 1 |
| Pdcd10  | 0 | 0 | 0 | 0 | 1 | 0 | 0 | 0 | 0 | 1 | 1 | 1 |
| Pdcd11  | 0 | 0 | 0 | 0 | 1 | 0 | 0 | 0 | 0 | 1 | 1 | 1 |
| Pde4c   | 0 | 0 | 0 | 0 | 0 | 0 | 0 | 1 | 0 | 1 | 1 | 1 |
| Pde4d   | 0 | 0 | 0 | 0 | 1 | 0 | 0 | 0 | 0 | 1 | 1 | 1 |
| Pdgfra  | 0 | 0 | 0 | 0 | 1 | 0 | 0 | 0 | 0 | 1 | 1 | 1 |
| Pdgfrb  | 0 | 0 | 0 | 0 | 1 | 0 | 0 | 0 | 0 | 1 | 1 | 1 |
| Pdk1    | 0 | 0 | 0 | 0 | 1 | 0 | 0 | 0 | 0 | 1 | 1 | 1 |
| Pdlim7  | 0 | 0 | 0 | 0 | 1 | 0 | 0 | 0 | 0 | 1 | 1 | 1 |
| Pdp1    | 0 | 0 | 0 | 0 | 1 | 0 | 0 | 0 | 0 | 1 | 1 | 1 |
| Pdzd2   | 0 | 0 | 0 | 0 | 1 | 0 | 0 | 0 | 0 | 1 | 1 | 1 |
| Pdzd8   | 0 | 0 | 0 | 0 | 1 | 0 | 0 | 0 | 0 | 1 | 1 | 1 |
| Pdzrn4  | 0 | 0 | 0 | 0 | 1 | 0 | 0 | 0 | 0 | 1 | 1 | 1 |
| Pear1   | 0 | 0 | 0 | 0 | 1 | 0 | 0 | 0 | 0 | 1 | 1 | 1 |
| Peg3    | 0 | 0 | 0 | 0 | 1 | 0 | 0 | 0 | 0 | 1 | 1 | 1 |
| Pelp1   | 0 | 0 | 0 | 0 | 1 | 0 | 0 | 0 | 0 | 1 | 1 | 1 |
| Per1    | 0 | 0 | 0 | 0 | 1 | 0 | 0 | 0 | 0 | 1 | 1 | 1 |
| Perm1   | 0 | 0 | 0 | 0 | 1 | 0 | 0 | 0 | 0 | 1 | 1 | 1 |
| Pet117  | 0 | 0 | 0 | 0 | 1 | 0 | 0 | 0 | 0 | 1 | 1 | 1 |
| Pfpl    | 0 | 0 | 0 | 0 | 1 | 0 | 0 | 0 | 0 | 1 | 1 | 1 |
| Pgam2   | 0 | 0 | 0 | 0 | 1 | 0 | 0 | 0 | 0 | 1 | 1 | 1 |
| Pgap3   | 0 | 0 | 0 | 0 | 1 | 0 | 0 | 0 | 0 | 1 | 1 | 1 |
| Pgk2    | 0 | 0 | 0 | 0 | 1 | 0 | 0 | 0 | 0 | 1 | 1 | 1 |
| Pgr15l  | 0 | 0 | 0 | 0 | 1 | 0 | 0 | 0 | 0 | 1 | 1 | 1 |
| Phactr3 | 0 | 0 | 0 | 0 | 1 | 0 | 0 | 0 | 0 | 1 | 1 | 1 |
| Phc1    | 0 | 0 | 0 | 0 | 1 | 0 | 0 | 0 | 0 | 1 | 1 | 1 |
| Phf10   | 0 | 0 | 0 | 0 | 1 | 0 | 0 | 0 | 0 | 1 | 1 | 1 |
| Phf12   | 0 | 0 | 0 | 0 | 1 | 0 | 0 | 0 | 0 | 1 | 1 | 1 |
| Phf14   | 0 | 0 | 0 | 0 | 1 | 0 | 0 | 0 | 0 | 1 | 1 | 1 |
| Phf21a  | 0 | 0 | 0 | 0 | 1 | 0 | 0 | 0 | 0 | 1 | 1 | 1 |
| Phf21b  | 0 | 0 | 0 | 0 | 1 | 0 | 0 | 0 | 0 | 1 | 1 | 1 |

|          |   |   |   |   |   |   |   |   |   |   |   |   |
|----------|---|---|---|---|---|---|---|---|---|---|---|---|
| Phf3     | 0 | 0 | 0 | 0 | 1 | 0 | 0 | 0 | 0 | 1 | 1 | 1 |
| Phkb     | 0 | 0 | 0 | 0 | 1 | 0 | 0 | 0 | 0 | 1 | 1 | 1 |
| Phlda3   | 0 | 0 | 0 | 0 | 1 | 0 | 0 | 0 | 0 | 1 | 1 | 1 |
| Phldb2   | 0 | 0 | 0 | 0 | 1 | 0 | 0 | 0 | 0 | 1 | 1 | 1 |
| Pigc     | 0 | 0 | 0 | 0 | 1 | 0 | 0 | 0 | 0 | 1 | 1 | 1 |
| Pign     | 0 | 0 | 0 | 0 | 0 | 0 | 0 | 1 | 0 | 1 | 1 | 1 |
| Pigp     | 0 | 0 | 0 | 0 | 1 | 0 | 0 | 0 | 0 | 1 | 1 | 1 |
| Pik3c2g  | 0 | 0 | 0 | 0 | 1 | 0 | 0 | 0 | 0 | 1 | 1 | 1 |
| Pik3ca   | 0 | 0 | 0 | 0 | 1 | 0 | 0 | 0 | 0 | 1 | 1 | 1 |
| Pikfyve  | 0 | 0 | 0 | 0 | 1 | 0 | 0 | 0 | 0 | 1 | 1 | 1 |
| Pip5kl1  | 0 | 0 | 0 | 0 | 1 | 0 | 0 | 0 | 0 | 1 | 1 | 1 |
| Pja2     | 0 | 0 | 0 | 0 | 1 | 0 | 0 | 0 | 0 | 1 | 1 | 1 |
| Pkd2l1   | 0 | 0 | 0 | 0 | 1 | 0 | 0 | 0 | 0 | 1 | 1 | 1 |
| Pkp3     | 0 | 0 | 0 | 0 | 1 | 0 | 0 | 0 | 0 | 1 | 1 | 1 |
| Plch1    | 0 | 0 | 0 | 0 | 1 | 0 | 0 | 0 | 0 | 1 | 1 | 1 |
| Plekha3  | 0 | 0 | 0 | 0 | 1 | 0 | 0 | 0 | 0 | 1 | 1 | 1 |
| Plekha4  | 0 | 0 | 0 | 0 | 1 | 0 | 0 | 0 | 0 | 1 | 1 | 1 |
| Plin5    | 0 | 0 | 0 | 0 | 1 | 0 | 0 | 0 | 0 | 1 | 1 | 1 |
| Plk2     | 0 | 0 | 0 | 0 | 1 | 0 | 0 | 0 | 0 | 1 | 1 | 1 |
| Plod2    | 0 | 0 | 0 | 0 | 0 | 0 | 0 | 1 | 0 | 1 | 1 | 1 |
| Plppr2   | 0 | 0 | 0 | 0 | 1 | 0 | 0 | 0 | 0 | 1 | 1 | 1 |
| Plxna1   | 0 | 0 | 0 | 0 | 1 | 0 | 0 | 0 | 0 | 1 | 1 | 1 |
| Plxna2   | 0 | 0 | 0 | 0 | 1 | 0 | 0 | 0 | 0 | 1 | 1 | 1 |
| Pmfbp1   | 0 | 0 | 0 | 0 | 1 | 0 | 0 | 0 | 0 | 1 | 1 | 1 |
| Pml      | 0 | 0 | 0 | 0 | 1 | 0 | 0 | 0 | 0 | 1 | 1 | 1 |
| Pnliprp2 | 0 | 0 | 0 | 0 | 1 | 0 | 0 | 0 | 0 | 1 | 1 | 1 |
| Pnpt1    | 0 | 0 | 0 | 0 | 1 | 0 | 0 | 0 | 0 | 1 | 1 | 1 |
| Podxl    | 0 | 0 | 0 | 0 | 1 | 0 | 0 | 0 | 0 | 1 | 1 | 1 |
| Pola2    | 0 | 0 | 0 | 0 | 1 | 0 | 0 | 0 | 0 | 1 | 1 | 1 |
| Pold3    | 0 | 0 | 0 | 0 | 1 | 0 | 0 | 0 | 0 | 1 | 1 | 1 |
| Pole     | 0 | 0 | 0 | 0 | 1 | 0 | 0 | 0 | 0 | 1 | 1 | 1 |
| Polg2    | 0 | 0 | 0 | 0 | 1 | 0 | 0 | 0 | 0 | 1 | 1 | 1 |
| Polq     | 0 | 0 | 0 | 0 | 1 | 0 | 0 | 0 | 0 | 1 | 1 | 1 |

|          |   |   |   |   |   |   |   |   |   |   |   |   |
|----------|---|---|---|---|---|---|---|---|---|---|---|---|
| Polr2c   | 0 | 0 | 0 | 0 | 1 | 0 | 0 | 0 | 0 | 1 | 1 | 1 |
| Polr2m   | 0 | 0 | 0 | 0 | 1 | 0 | 0 | 0 | 0 | 1 | 1 | 1 |
| Polr3d   | 0 | 0 | 0 | 0 | 1 | 0 | 0 | 0 | 0 | 1 | 1 | 1 |
| Pom121   | 0 | 0 | 0 | 0 | 1 | 0 | 0 | 0 | 0 | 1 | 1 | 1 |
| Por      | 0 | 0 | 0 | 0 | 1 | 0 | 0 | 0 | 0 | 1 | 1 | 1 |
| Postn    | 0 | 0 | 0 | 0 | 1 | 0 | 0 | 0 | 0 | 1 | 1 | 1 |
| Pou4f1   | 0 | 0 | 0 | 0 | 1 | 0 | 0 | 0 | 0 | 1 | 1 | 1 |
| Ppa2     | 0 | 0 | 0 | 0 | 1 | 0 | 0 | 0 | 0 | 1 | 1 | 1 |
| Ppfia3   | 0 | 0 | 0 | 0 | 0 | 1 | 0 | 0 | 0 | 1 | 1 | 1 |
| Pphln1   | 0 | 0 | 0 | 0 | 1 | 0 | 0 | 0 | 0 | 1 | 1 | 1 |
| Ppic     | 0 | 0 | 0 | 0 | 1 | 0 | 0 | 0 | 0 | 1 | 1 | 1 |
| Ppil2    | 0 | 0 | 0 | 0 | 1 | 0 | 0 | 0 | 0 | 1 | 1 | 1 |
| Ppm1g    | 0 | 0 | 0 | 0 | 0 | 0 | 0 | 1 | 0 | 1 | 1 | 1 |
| Ppm1k    | 0 | 0 | 0 | 0 | 1 | 0 | 0 | 0 | 0 | 1 | 1 | 1 |
| Ppme1    | 0 | 0 | 0 | 0 | 1 | 0 | 0 | 0 | 0 | 1 | 1 | 1 |
| Ppp1r13l | 0 | 0 | 0 | 0 | 1 | 0 | 0 | 0 | 0 | 1 | 1 | 1 |
| Ppp1r15b | 0 | 0 | 0 | 0 | 1 | 0 | 0 | 0 | 0 | 1 | 1 | 1 |
| Ppp1r26  | 0 | 0 | 0 | 0 | 1 | 0 | 0 | 0 | 0 | 1 | 1 | 1 |
| Ppp1r37  | 0 | 0 | 0 | 0 | 1 | 0 | 0 | 0 | 0 | 1 | 1 | 1 |
| Ppp1r9a  | 0 | 0 | 0 | 0 | 1 | 0 | 0 | 0 | 0 | 1 | 1 | 1 |
| Ppp2r3a  | 0 | 0 | 0 | 0 | 1 | 0 | 0 | 0 | 0 | 1 | 1 | 1 |
| Ppp2r5a  | 0 | 0 | 0 | 0 | 0 | 0 | 0 | 1 | 0 | 1 | 1 | 1 |
| Ppp3cb   | 0 | 0 | 0 | 0 | 1 | 0 | 0 | 0 | 0 | 1 | 1 | 1 |
| Ppp3cc   | 0 | 0 | 0 | 0 | 1 | 0 | 0 | 0 | 0 | 1 | 1 | 1 |
| Ppp5c    | 0 | 0 | 0 | 0 | 0 | 0 | 0 | 1 | 0 | 1 | 1 | 1 |
| Pramef12 | 0 | 0 | 0 | 0 | 1 | 0 | 0 | 0 | 0 | 1 | 1 | 1 |
| Pramef25 | 0 | 0 | 0 | 0 | 1 | 0 | 0 | 0 | 0 | 1 | 1 | 1 |
| Prdm4    | 0 | 0 | 0 | 0 | 1 | 0 | 0 | 0 | 0 | 1 | 1 | 1 |
| Prdm9    | 0 | 0 | 0 | 0 | 1 | 0 | 0 | 0 | 0 | 1 | 1 | 1 |
| Prelid3a | 0 | 0 | 0 | 0 | 1 | 0 | 0 | 0 | 0 | 1 | 1 | 1 |
| Prelp    | 0 | 0 | 0 | 0 | 1 | 0 | 0 | 0 | 0 | 1 | 1 | 1 |
| Prex2    | 0 | 0 | 0 | 0 | 1 | 0 | 0 | 0 | 0 | 1 | 1 | 1 |
| Prg4     | 0 | 0 | 0 | 0 | 1 | 0 | 0 | 0 | 0 | 1 | 1 | 1 |

|          |   |   |   |   |   |   |   |   |   |   |   |   |
|----------|---|---|---|---|---|---|---|---|---|---|---|---|
| Prickle2 | 0 | 0 | 0 | 0 | 1 | 0 | 0 | 0 | 0 | 1 | 1 | 1 |
| Prkag2   | 0 | 0 | 0 | 0 | 1 | 0 | 0 | 0 | 0 | 1 | 1 | 1 |
| Prkag3   | 0 | 0 | 0 | 0 | 1 | 0 | 0 | 0 | 0 | 1 | 1 | 1 |
| Prkar1b  | 0 | 0 | 0 | 0 | 1 | 0 | 0 | 0 | 0 | 1 | 1 | 1 |
| Prkar2a  | 0 | 0 | 0 | 0 | 1 | 0 | 0 | 0 | 0 | 1 | 1 | 1 |
| Prkcd    | 0 | 0 | 0 | 0 | 1 | 0 | 0 | 0 | 0 | 1 | 1 | 1 |
| Prkd3    | 0 | 0 | 0 | 0 | 1 | 0 | 0 | 0 | 0 | 1 | 1 | 1 |
| Prkg2    | 0 | 0 | 0 | 0 | 1 | 0 | 0 | 0 | 0 | 1 | 1 | 1 |
| Prl3d2   | 0 | 0 | 0 | 0 | 1 | 0 | 0 | 0 | 0 | 1 | 1 | 1 |
| Prl7b1   | 0 | 0 | 0 | 0 | 1 | 0 | 0 | 0 | 0 | 1 | 1 | 1 |
| Prmt3    | 0 | 0 | 0 | 0 | 1 | 0 | 0 | 0 | 0 | 1 | 1 | 1 |
| Prmt7    | 0 | 0 | 0 | 0 | 1 | 0 | 0 | 0 | 0 | 1 | 1 | 1 |
| Prmt9    | 0 | 0 | 0 | 0 | 1 | 0 | 0 | 0 | 0 | 1 | 1 | 1 |
| Proca1   | 0 | 0 | 0 | 0 | 1 | 0 | 0 | 0 | 0 | 1 | 1 | 1 |
| Prpf39   | 0 | 0 | 0 | 0 | 1 | 0 | 0 | 0 | 0 | 1 | 1 | 1 |
| Prpmp5   | 0 | 0 | 1 | 0 | 0 | 0 | 0 | 0 | 0 | 1 | 1 | 1 |
| Prr23a1  | 0 | 0 | 0 | 0 | 1 | 0 | 0 | 0 | 0 | 1 | 1 | 1 |
| Prrg2    | 0 | 0 | 0 | 0 | 1 | 0 | 0 | 0 | 0 | 1 | 1 | 1 |
| Prss36   | 0 | 0 | 0 | 0 | 1 | 0 | 0 | 0 | 0 | 1 | 1 | 1 |
| Prss53   | 0 | 0 | 0 | 0 | 1 | 0 | 0 | 0 | 0 | 1 | 1 | 1 |
| Psg17    | 0 | 0 | 0 | 0 | 1 | 0 | 0 | 0 | 0 | 1 | 1 | 1 |
| Psg18    | 0 | 0 | 0 | 0 | 0 | 1 | 0 | 0 | 0 | 1 | 1 | 1 |
| Psg19    | 0 | 0 | 0 | 0 | 1 | 0 | 0 | 0 | 0 | 1 | 1 | 1 |
| Psg20    | 0 | 0 | 0 | 0 | 1 | 0 | 0 | 0 | 0 | 1 | 1 | 1 |
| Psg29    | 0 | 0 | 0 | 0 | 1 | 0 | 0 | 0 | 0 | 1 | 1 | 1 |
| Psmc5    | 0 | 0 | 0 | 0 | 0 | 0 | 0 | 1 | 0 | 1 | 1 | 1 |
| Ptch1    | 0 | 0 | 0 | 0 | 1 | 0 | 0 | 0 | 0 | 1 | 1 | 1 |
| Ptchd3   | 0 | 0 | 0 | 0 | 0 | 0 | 0 | 1 | 0 | 1 | 1 | 1 |
| Ptchd4   | 0 | 0 | 0 | 0 | 1 | 0 | 0 | 0 | 0 | 1 | 1 | 1 |
| Pten     | 0 | 0 | 0 | 0 | 1 | 0 | 0 | 0 | 0 | 1 | 1 | 1 |
| Ptgfrn   | 0 | 0 | 0 | 0 | 1 | 0 | 0 | 0 | 0 | 1 | 1 | 1 |
| Pth      | 0 | 0 | 0 | 0 | 1 | 0 | 0 | 0 | 0 | 1 | 1 | 1 |
| Pth1r    | 0 | 0 | 0 | 0 | 0 | 1 | 0 | 0 | 0 | 1 | 1 | 1 |

|           |   |   |   |   |   |   |   |   |   |   |   |   |
|-----------|---|---|---|---|---|---|---|---|---|---|---|---|
| Ptov1     | 0 | 0 | 0 | 0 | 1 | 0 | 0 | 0 | 0 | 1 | 1 | 1 |
| Ptpn20    | 0 | 0 | 0 | 0 | 1 | 0 | 0 | 0 | 0 | 1 | 1 | 1 |
| Ptpn23    | 0 | 0 | 0 | 0 | 1 | 0 | 0 | 0 | 0 | 1 | 1 | 1 |
| Ptpn3     | 0 | 0 | 0 | 0 | 1 | 0 | 0 | 0 | 0 | 1 | 1 | 1 |
| Ptpn6     | 0 | 0 | 0 | 0 | 1 | 0 | 0 | 0 | 0 | 1 | 1 | 1 |
| Ptprq     | 0 | 0 | 0 | 0 | 1 | 0 | 0 | 0 | 0 | 1 | 1 | 1 |
| Ptprr     | 0 | 0 | 0 | 0 | 1 | 0 | 0 | 0 | 0 | 1 | 1 | 1 |
| Puf60     | 0 | 0 | 0 | 0 | 1 | 0 | 0 | 0 | 0 | 1 | 1 | 1 |
| Pum2      | 0 | 0 | 0 | 0 | 1 | 0 | 0 | 0 | 0 | 1 | 1 | 1 |
| Pwp1      | 0 | 0 | 0 | 0 | 1 | 0 | 0 | 0 | 0 | 1 | 1 | 1 |
| Qrich1    | 0 | 0 | 0 | 0 | 1 | 0 | 0 | 0 | 0 | 1 | 1 | 1 |
| Qrsl1     | 0 | 0 | 0 | 0 | 1 | 0 | 0 | 0 | 0 | 1 | 1 | 1 |
| Qtrt1     | 0 | 0 | 0 | 0 | 1 | 0 | 0 | 0 | 0 | 1 | 1 | 1 |
| Rab11fip1 | 0 | 0 | 0 | 0 | 1 | 0 | 0 | 0 | 0 | 1 | 1 | 1 |
| Rab22a    | 0 | 0 | 0 | 0 | 1 | 0 | 0 | 0 | 0 | 1 | 1 | 1 |
| Rab3c     | 0 | 0 | 0 | 0 | 1 | 0 | 0 | 0 | 0 | 1 | 1 | 1 |
| Rab6b     | 0 | 0 | 0 | 0 | 0 | 0 | 0 | 1 | 0 | 1 | 1 | 1 |
| Rab8a     | 0 | 0 | 0 | 0 | 1 | 0 | 0 | 0 | 0 | 1 | 1 | 1 |
| Rab9      | 0 | 0 | 0 | 0 | 1 | 0 | 0 | 0 | 0 | 1 | 1 | 1 |
| Rabep1    | 0 | 0 | 0 | 0 | 1 | 0 | 0 | 0 | 0 | 1 | 1 | 1 |
| Rabgap1l  | 0 | 0 | 0 | 0 | 0 | 0 | 0 | 1 | 0 | 1 | 1 | 1 |
| Rad21l    | 0 | 0 | 0 | 0 | 1 | 0 | 0 | 0 | 0 | 1 | 1 | 1 |
| Rad9b     | 0 | 0 | 0 | 0 | 1 | 0 | 0 | 0 | 0 | 1 | 1 | 1 |
| Radil     | 0 | 0 | 0 | 0 | 1 | 0 | 0 | 0 | 0 | 1 | 1 | 1 |
| Raet1d    | 0 | 0 | 0 | 0 | 1 | 0 | 0 | 0 | 0 | 1 | 1 | 1 |
| Raf1      | 0 | 0 | 0 | 0 | 1 | 0 | 0 | 0 | 0 | 1 | 1 | 1 |
| Rai1      | 0 | 0 | 0 | 0 | 1 | 0 | 0 | 0 | 0 | 1 | 1 | 1 |
| Ralgapa2  | 0 | 0 | 0 | 0 | 1 | 0 | 0 | 0 | 0 | 1 | 1 | 1 |
| Ralgapb   | 0 | 0 | 0 | 0 | 0 | 0 | 0 | 1 | 0 | 1 | 1 | 1 |
| Ralyl     | 0 | 0 | 0 | 0 | 1 | 0 | 0 | 0 | 0 | 1 | 1 | 1 |
| Ranbp2    | 0 | 0 | 0 | 0 | 1 | 0 | 0 | 0 | 0 | 1 | 1 | 1 |
| Rapgef1   | 0 | 0 | 0 | 0 | 0 | 0 | 0 | 1 | 0 | 1 | 1 | 1 |
| Rapgef4   | 0 | 0 | 0 | 0 | 1 | 0 | 0 | 0 | 0 | 1 | 1 | 1 |



|         |   |   |   |   |   |   |   |   |   |   |   |   |
|---------|---|---|---|---|---|---|---|---|---|---|---|---|
| Rapgef5 | 0 | 0 | 0 | 0 | 0 | 1 | 0 | 0 | 0 | 1 | 1 | 1 |
| Raph1   | 0 | 0 | 0 | 0 | 1 | 0 | 0 | 0 | 0 | 1 | 1 | 1 |
| Rasa3   | 0 | 0 | 0 | 0 | 1 | 0 | 0 | 0 | 0 | 1 | 1 | 1 |
| Rasd2   | 0 | 0 | 0 | 0 | 1 | 0 | 0 | 0 | 0 | 1 | 1 | 1 |
| Rasgrf1 | 0 | 0 | 0 | 0 | 1 | 0 | 0 | 0 | 0 | 1 | 1 | 1 |
| Rasip1  | 0 | 0 | 0 | 0 | 1 | 0 | 0 | 0 | 0 | 1 | 1 | 1 |
| Rassf4  | 0 | 0 | 0 | 0 | 1 | 0 | 0 | 0 | 0 | 1 | 1 | 1 |
| Raver1  | 0 | 0 | 0 | 0 | 1 | 0 | 0 | 0 | 0 | 1 | 1 | 1 |
| Rax     | 0 | 0 | 0 | 0 | 1 | 0 | 0 | 0 | 0 | 1 | 1 | 1 |
| Rb1     | 0 | 0 | 0 | 0 | 1 | 0 | 0 | 0 | 0 | 1 | 1 | 1 |
| Rb1cc1  | 0 | 0 | 0 | 0 | 1 | 0 | 0 | 0 | 0 | 1 | 1 | 1 |
| Rbbp6   | 0 | 0 | 0 | 0 | 1 | 0 | 0 | 0 | 0 | 1 | 1 | 1 |
| Rbfa    | 0 | 0 | 0 | 0 | 1 | 0 | 0 | 0 | 0 | 1 | 1 | 1 |
| Rbm10   | 0 | 0 | 0 | 0 | 1 | 0 | 0 | 0 | 0 | 1 | 1 | 1 |
| Rbm22   | 0 | 0 | 0 | 0 | 1 | 0 | 0 | 0 | 0 | 1 | 1 | 1 |
| Rbm46   | 0 | 0 | 0 | 0 | 1 | 0 | 0 | 0 | 0 | 1 | 1 | 1 |
| Rc3h1   | 0 | 0 | 0 | 0 | 0 | 0 | 0 | 1 | 0 | 1 | 1 | 1 |
| Rcn2    | 0 | 0 | 0 | 0 | 0 | 1 | 0 | 0 | 0 | 1 | 1 | 1 |
| Rdh12   | 0 | 0 | 0 | 0 | 1 | 0 | 0 | 0 | 0 | 1 | 1 | 1 |
| Reep4   | 0 | 0 | 0 | 0 | 1 | 0 | 0 | 0 | 0 | 1 | 1 | 1 |
| Reln    | 0 | 0 | 0 | 0 | 1 | 0 | 0 | 0 | 0 | 1 | 1 | 1 |
| Rere    | 0 | 0 | 0 | 0 | 1 | 0 | 0 | 0 | 0 | 1 | 1 | 1 |
| Rerg    | 0 | 0 | 0 | 0 | 1 | 0 | 0 | 0 | 0 | 1 | 1 | 1 |
| Retreg3 | 0 | 0 | 0 | 0 | 1 | 0 | 0 | 0 | 0 | 1 | 1 | 1 |
| Rfwd3   | 0 | 0 | 0 | 0 | 1 | 0 | 0 | 0 | 0 | 1 | 1 | 1 |
| Rgs10   | 0 | 0 | 0 | 0 | 1 | 0 | 0 | 0 | 0 | 1 | 1 | 1 |
| Rgs3    | 0 | 0 | 0 | 0 | 1 | 0 | 0 | 0 | 0 | 1 | 1 | 1 |
| Rgs6    | 0 | 0 | 0 | 0 | 0 | 0 | 0 | 1 | 0 | 1 | 1 | 1 |
| Rhbdf1  | 0 | 0 | 0 | 0 | 1 | 0 | 0 | 0 | 0 | 1 | 1 | 1 |
| Rhbdl2  | 0 | 0 | 0 | 0 | 1 | 0 | 0 | 0 | 0 | 1 | 1 | 1 |
| Rhno1   | 0 | 0 | 0 | 0 | 1 | 0 | 0 | 0 | 0 | 1 | 1 | 1 |
| Rhot2   | 0 | 0 | 0 | 0 | 1 | 0 | 0 | 0 | 0 | 1 | 1 | 1 |
| Ric1    | 0 | 0 | 0 | 0 | 1 | 0 | 0 | 0 | 0 | 1 | 1 | 1 |

|          |   |   |   |   |   |   |   |   |   |   |   |   |
|----------|---|---|---|---|---|---|---|---|---|---|---|---|
| Rin3     | 0 | 0 | 0 | 0 | 1 | 0 | 0 | 0 | 0 | 1 | 1 | 1 |
| Ripor3   | 0 | 0 | 0 | 0 | 1 | 0 | 0 | 0 | 0 | 1 | 1 | 1 |
| Rnase2a  | 0 | 0 | 0 | 0 | 1 | 0 | 0 | 0 | 0 | 1 | 1 | 1 |
| Rnase6   | 0 | 0 | 0 | 0 | 0 | 1 | 0 | 0 | 0 | 1 | 1 | 1 |
| Rnasel   | 0 | 0 | 0 | 0 | 1 | 0 | 0 | 0 | 0 | 1 | 1 | 1 |
| Rnf113a2 | 0 | 0 | 0 | 0 | 1 | 0 | 0 | 0 | 0 | 1 | 1 | 1 |
| Rnf17    | 0 | 0 | 0 | 0 | 1 | 0 | 0 | 0 | 0 | 1 | 1 | 1 |
| Rnf19b   | 0 | 0 | 0 | 0 | 1 | 0 | 0 | 0 | 0 | 1 | 1 | 1 |
| Rnf4     | 0 | 0 | 0 | 0 | 1 | 0 | 0 | 0 | 0 | 1 | 1 | 1 |
| Rnf41    | 0 | 0 | 0 | 0 | 1 | 0 | 0 | 0 | 0 | 1 | 1 | 1 |
| Rnf43    | 0 | 0 | 0 | 0 | 1 | 0 | 0 | 0 | 0 | 1 | 1 | 1 |
| Robo1    | 0 | 0 | 0 | 0 | 1 | 0 | 0 | 0 | 0 | 1 | 1 | 1 |
| Robo2    | 0 | 0 | 0 | 0 | 1 | 0 | 0 | 0 | 0 | 1 | 1 | 1 |
| Robo3    | 0 | 0 | 0 | 0 | 0 | 0 | 0 | 1 | 0 | 1 | 1 | 1 |
| Rock2    | 0 | 0 | 0 | 0 | 1 | 0 | 0 | 0 | 0 | 1 | 1 | 1 |
| Rogdi    | 0 | 0 | 0 | 0 | 1 | 0 | 0 | 0 | 0 | 1 | 1 | 1 |
| Rp9      | 0 | 0 | 0 | 0 | 1 | 0 | 0 | 0 | 0 | 1 | 1 | 1 |
| Rpgrip1l | 0 | 0 | 0 | 0 | 1 | 0 | 0 | 0 | 0 | 1 | 1 | 1 |
| Rpl3     | 0 | 0 | 0 | 0 | 1 | 0 | 0 | 0 | 0 | 1 | 1 | 1 |
| Rpl4     | 0 | 0 | 0 | 0 | 1 | 0 | 0 | 0 | 0 | 1 | 1 | 1 |
| Rpn1     | 0 | 0 | 0 | 0 | 1 | 0 | 0 | 0 | 0 | 1 | 1 | 1 |
| Rpp14    | 0 | 0 | 0 | 0 | 1 | 0 | 0 | 0 | 0 | 1 | 1 | 1 |
| Rps2     | 0 | 0 | 0 | 0 | 1 | 0 | 0 | 0 | 0 | 1 | 1 | 1 |
| Rps6ka2  | 0 | 0 | 0 | 0 | 1 | 0 | 0 | 0 | 0 | 1 | 1 | 1 |
| Rps6kb2  | 0 | 0 | 0 | 0 | 1 | 0 | 0 | 0 | 0 | 1 | 1 | 1 |
| Rps6kc1  | 0 | 0 | 0 | 0 | 1 | 0 | 0 | 0 | 0 | 1 | 1 | 1 |
| Rrp8     | 0 | 0 | 0 | 0 | 1 | 0 | 0 | 0 | 0 | 1 | 1 | 1 |
| Rrp9     | 0 | 0 | 0 | 0 | 1 | 0 | 0 | 0 | 0 | 1 | 1 | 1 |
| Rsb1     | 0 | 0 | 0 | 0 | 1 | 0 | 0 | 0 | 0 | 1 | 1 | 1 |
| Rsb1l    | 0 | 0 | 0 | 0 | 1 | 0 | 0 | 0 | 0 | 1 | 1 | 1 |
| Rsl24d1  | 0 | 0 | 0 | 0 | 1 | 0 | 0 | 0 | 0 | 1 | 1 | 1 |
| Rsph10b  | 0 | 0 | 0 | 0 | 1 | 0 | 0 | 0 | 0 | 1 | 1 | 1 |
| Rsrc2    | 0 | 0 | 0 | 0 | 1 | 0 | 0 | 0 | 0 | 1 | 1 | 1 |

|           |   |   |   |   |   |   |   |   |   |   |   |   |
|-----------|---|---|---|---|---|---|---|---|---|---|---|---|
| Rtl9      | 0 | 0 | 0 | 0 | 1 | 0 | 0 | 0 | 0 | 1 | 1 | 1 |
| Rundc1    | 0 | 0 | 0 | 1 | 0 | 0 | 0 | 0 | 0 | 1 | 1 | 1 |
| Sall1     | 0 | 0 | 0 | 0 | 1 | 0 | 0 | 0 | 0 | 1 | 1 | 1 |
| Satb1     | 0 | 0 | 0 | 0 | 1 | 0 | 0 | 0 | 0 | 1 | 1 | 1 |
| Sbsn      | 0 | 0 | 0 | 0 | 1 | 0 | 0 | 0 | 0 | 1 | 1 | 1 |
| Sc5d      | 1 | 0 | 0 | 0 | 0 | 0 | 0 | 0 | 0 | 1 | 1 | 1 |
| Scaf1     | 0 | 0 | 0 | 0 | 1 | 0 | 0 | 0 | 0 | 1 | 1 | 1 |
| Scaf11    | 0 | 0 | 0 | 0 | 1 | 0 | 0 | 0 | 0 | 1 | 1 | 1 |
| Scap      | 0 | 0 | 0 | 0 | 1 | 0 | 0 | 0 | 0 | 1 | 1 | 1 |
| Scel      | 0 | 0 | 0 | 0 | 1 | 0 | 0 | 0 | 0 | 1 | 1 | 1 |
| Scgb2b20  | 0 | 0 | 0 | 0 | 1 | 0 | 0 | 0 | 0 | 1 | 1 | 1 |
| Scgb3a2   | 0 | 0 | 0 | 0 | 1 | 0 | 0 | 0 | 0 | 1 | 1 | 1 |
| Scgn      | 0 | 0 | 0 | 0 | 0 | 0 | 0 | 1 | 0 | 1 | 1 | 1 |
| Scml2     | 0 | 0 | 0 | 0 | 1 | 0 | 0 | 0 | 0 | 1 | 1 | 1 |
| Scn3b     | 0 | 0 | 0 | 0 | 1 | 0 | 0 | 0 | 0 | 1 | 1 | 1 |
| Scn9a     | 0 | 0 | 0 | 0 | 1 | 0 | 0 | 0 | 0 | 1 | 1 | 1 |
| Scp2      | 0 | 0 | 0 | 0 | 0 | 1 | 0 | 0 | 0 | 1 | 1 | 1 |
| Sdad1     | 0 | 0 | 0 | 0 | 1 | 0 | 0 | 0 | 0 | 1 | 1 | 1 |
| Sdk1      | 0 | 0 | 0 | 0 | 1 | 0 | 0 | 0 | 0 | 1 | 1 | 1 |
| Sdk2      | 0 | 0 | 0 | 0 | 1 | 0 | 0 | 0 | 0 | 1 | 1 | 1 |
| Sec16a    | 0 | 0 | 0 | 0 | 1 | 0 | 0 | 0 | 0 | 1 | 1 | 1 |
| Sec24a    | 0 | 0 | 0 | 0 | 1 | 0 | 0 | 0 | 0 | 1 | 1 | 1 |
| Sec24b    | 0 | 0 | 0 | 0 | 0 | 0 | 0 | 1 | 0 | 1 | 1 | 1 |
| Sectm1b   | 0 | 0 | 0 | 0 | 1 | 0 | 0 | 0 | 0 | 1 | 1 | 1 |
| Selenbp2  | 0 | 0 | 0 | 0 | 1 | 0 | 0 | 0 | 0 | 1 | 1 | 1 |
| Sema3a    | 0 | 0 | 0 | 0 | 1 | 0 | 0 | 0 | 0 | 1 | 1 | 1 |
| Sema3c    | 0 | 0 | 0 | 0 | 0 | 1 | 0 | 0 | 0 | 1 | 1 | 1 |
| Sema3f    | 0 | 0 | 0 | 0 | 1 | 0 | 0 | 0 | 0 | 1 | 1 | 1 |
| Sema4f    | 0 | 0 | 0 | 0 | 1 | 0 | 0 | 0 | 0 | 1 | 1 | 1 |
| Sema5b    | 0 | 0 | 0 | 0 | 1 | 0 | 0 | 0 | 0 | 1 | 1 | 1 |
| Sema6a    | 0 | 0 | 0 | 0 | 1 | 0 | 0 | 0 | 0 | 1 | 1 | 1 |
| Sergef    | 0 | 0 | 0 | 0 | 1 | 0 | 0 | 0 | 0 | 1 | 1 | 1 |
| Serpina16 | 0 | 0 | 0 | 0 | 1 | 0 | 0 | 0 | 0 | 1 | 1 | 1 |

|           |   |   |   |   |   |   |   |   |   |   |   |   |
|-----------|---|---|---|---|---|---|---|---|---|---|---|---|
| Serpina1e | 0 | 0 | 0 | 0 | 1 | 0 | 0 | 0 | 0 | 1 | 1 | 1 |
| Serpinb7  | 0 | 0 | 0 | 0 | 1 | 0 | 0 | 0 | 0 | 1 | 1 | 1 |
| Sertad4   | 0 | 0 | 0 | 0 | 1 | 0 | 0 | 0 | 0 | 1 | 1 | 1 |
| Sesn1     | 0 | 0 | 0 | 0 | 1 | 0 | 0 | 0 | 0 | 1 | 1 | 1 |
| Sez6l2    | 0 | 0 | 0 | 0 | 1 | 0 | 0 | 0 | 0 | 1 | 1 | 1 |
| Sf3b1     | 0 | 0 | 0 | 0 | 1 | 0 | 0 | 0 | 0 | 1 | 1 | 1 |
| Sgip1     | 0 | 0 | 0 | 0 | 1 | 0 | 0 | 0 | 0 | 1 | 1 | 1 |
| Sh2d5     | 0 | 0 | 0 | 0 | 1 | 0 | 0 | 0 | 0 | 1 | 1 | 1 |
| Sh3bp4    | 0 | 0 | 0 | 0 | 1 | 0 | 0 | 0 | 0 | 1 | 1 | 1 |
| Sh3tc1    | 1 | 0 | 0 | 0 | 0 | 0 | 0 | 0 | 0 | 1 | 1 | 1 |
| Shank2    | 0 | 0 | 0 | 0 | 1 | 0 | 0 | 0 | 0 | 1 | 1 | 1 |
| Shank3    | 0 | 0 | 0 | 0 | 1 | 0 | 0 | 0 | 0 | 1 | 1 | 1 |
| Shmt1     | 0 | 0 | 0 | 0 | 1 | 0 | 0 | 0 | 0 | 1 | 1 | 1 |
| Shq1      | 0 | 0 | 0 | 0 | 1 | 0 | 0 | 0 | 0 | 1 | 1 | 1 |
| Sidt2     | 0 | 0 | 0 | 0 | 1 | 0 | 0 | 0 | 0 | 1 | 1 | 1 |
| Sik3      | 0 | 0 | 0 | 0 | 1 | 0 | 0 | 0 | 0 | 1 | 1 | 1 |
| Sipa1l3   | 0 | 0 | 0 | 0 | 1 | 0 | 0 | 0 | 0 | 1 | 1 | 1 |
| Skap1     | 0 | 0 | 0 | 0 | 1 | 0 | 0 | 0 | 0 | 1 | 1 | 1 |
| Skida1    | 0 | 0 | 0 | 0 | 1 | 0 | 0 | 0 | 0 | 1 | 1 | 1 |
| Skint4    | 0 | 0 | 0 | 0 | 1 | 0 | 0 | 0 | 0 | 1 | 1 | 1 |
| Skint5    | 0 | 0 | 0 | 0 | 0 | 0 | 0 | 1 | 0 | 1 | 1 | 1 |
| Skor2     | 0 | 0 | 0 | 0 | 1 | 0 | 0 | 0 | 0 | 1 | 1 | 1 |
| Slamf7    | 0 | 0 | 0 | 0 | 1 | 0 | 0 | 0 | 0 | 1 | 1 | 1 |
| Slc12a3   | 0 | 0 | 0 | 0 | 1 | 0 | 0 | 0 | 0 | 1 | 1 | 1 |
| Slc14a1   | 0 | 0 | 0 | 0 | 0 | 1 | 0 | 0 | 0 | 1 | 1 | 1 |
| Slc16a10  | 0 | 0 | 0 | 0 | 1 | 0 | 0 | 0 | 0 | 1 | 1 | 1 |
| Slc17a1   | 0 | 0 | 0 | 0 | 1 | 0 | 0 | 0 | 0 | 1 | 1 | 1 |
| Slc17a2   | 0 | 0 | 0 | 0 | 0 | 1 | 0 | 0 | 0 | 1 | 1 | 1 |
| Slc19a2   | 0 | 0 | 0 | 0 | 1 | 0 | 0 | 0 | 0 | 1 | 1 | 1 |
| Slc1a3    | 0 | 0 | 0 | 0 | 1 | 0 | 0 | 0 | 0 | 1 | 1 | 1 |
| Slc1a4    | 0 | 0 | 0 | 0 | 1 | 0 | 0 | 0 | 0 | 1 | 1 | 1 |
| Slc22a15  | 0 | 0 | 0 | 0 | 1 | 0 | 0 | 0 | 0 | 1 | 1 | 1 |
| Slc24a1   | 0 | 0 | 0 | 0 | 1 | 0 | 0 | 0 | 0 | 1 | 1 | 1 |

|          |   |   |   |   |   |   |   |   |   |   |   |   |
|----------|---|---|---|---|---|---|---|---|---|---|---|---|
| Slc24a4  | 0 | 0 | 0 | 0 | 1 | 0 | 0 | 0 | 0 | 1 | 1 | 1 |
| Slc25a14 | 0 | 0 | 0 | 0 | 1 | 0 | 0 | 0 | 0 | 1 | 1 | 1 |
| Slc25a17 | 0 | 0 | 0 | 0 | 1 | 0 | 0 | 0 | 0 | 1 | 1 | 1 |
| Slc25a27 | 0 | 0 | 0 | 0 | 1 | 0 | 0 | 0 | 0 | 1 | 1 | 1 |
| Slc25a3  | 0 | 0 | 0 | 0 | 0 | 1 | 0 | 0 | 0 | 1 | 1 | 1 |
| Slc25a39 | 0 | 0 | 0 | 0 | 1 | 0 | 0 | 0 | 0 | 1 | 1 | 1 |
| Slc25a48 | 0 | 0 | 0 | 0 | 1 | 0 | 0 | 0 | 0 | 1 | 1 | 1 |
| Slc26a4  | 0 | 0 | 0 | 0 | 1 | 0 | 0 | 0 | 0 | 1 | 1 | 1 |
| Slc2a9   | 0 | 0 | 0 | 0 | 1 | 0 | 0 | 0 | 0 | 1 | 1 | 1 |
| Slc30a1  | 0 | 0 | 0 | 0 | 1 | 0 | 0 | 0 | 0 | 1 | 1 | 1 |
| Slc30a3  | 0 | 0 | 0 | 0 | 1 | 0 | 0 | 0 | 0 | 1 | 1 | 1 |
| Slc34a2  | 0 | 0 | 0 | 0 | 0 | 1 | 0 | 0 | 0 | 1 | 1 | 1 |
| Slc35e2  | 0 | 0 | 0 | 0 | 1 | 0 | 0 | 0 | 0 | 1 | 1 | 1 |
| Slc37a2  | 0 | 0 | 0 | 0 | 0 | 1 | 0 | 0 | 0 | 1 | 1 | 1 |
| Slc39a11 | 0 | 0 | 0 | 0 | 1 | 0 | 0 | 0 | 0 | 1 | 1 | 1 |
| Slc44a3  | 0 | 0 | 0 | 0 | 1 | 0 | 0 | 0 | 0 | 1 | 1 | 1 |
| Slc44a5  | 0 | 0 | 0 | 0 | 0 | 0 | 0 | 1 | 0 | 1 | 1 | 1 |
| Slc45a1  | 0 | 0 | 0 | 0 | 1 | 0 | 0 | 0 | 0 | 1 | 1 | 1 |
| Slc52a2  | 0 | 0 | 0 | 0 | 0 | 0 | 1 | 0 | 0 | 1 | 1 | 1 |
| Slc5a4b  | 0 | 0 | 0 | 0 | 1 | 0 | 0 | 0 | 0 | 1 | 1 | 1 |
| Slc6a3   | 0 | 0 | 0 | 0 | 1 | 0 | 0 | 0 | 0 | 1 | 1 | 1 |
| Slc7a15  | 0 | 0 | 0 | 0 | 1 | 0 | 0 | 0 | 0 | 1 | 1 | 1 |
| Slc8a1   | 0 | 0 | 0 | 0 | 1 | 0 | 0 | 0 | 0 | 1 | 1 | 1 |
| Slc8a3   | 0 | 0 | 0 | 0 | 1 | 0 | 0 | 0 | 0 | 1 | 1 | 1 |
| Slc9a2   | 0 | 0 | 0 | 0 | 1 | 0 | 0 | 0 | 0 | 1 | 1 | 1 |
| Slc9a9   | 0 | 0 | 0 | 0 | 1 | 0 | 0 | 0 | 0 | 1 | 1 | 1 |
| Slfn3    | 0 | 0 | 0 | 0 | 1 | 0 | 0 | 0 | 0 | 1 | 1 | 1 |
| Slfn5    | 0 | 0 | 0 | 0 | 1 | 0 | 0 | 0 | 0 | 1 | 1 | 1 |
| Slit2    | 0 | 0 | 0 | 0 | 1 | 0 | 0 | 0 | 0 | 1 | 1 | 1 |
| Slk      | 0 | 0 | 0 | 0 | 1 | 0 | 0 | 0 | 0 | 1 | 1 | 1 |
| Slx4ip   | 0 | 0 | 0 | 0 | 1 | 0 | 0 | 0 | 0 | 1 | 1 | 1 |
| Smarcc2  | 0 | 0 | 0 | 0 | 1 | 0 | 0 | 0 | 0 | 1 | 1 | 1 |
| Smchd1   | 0 | 0 | 0 | 0 | 1 | 0 | 0 | 0 | 0 | 1 | 1 | 1 |

|           |   |   |   |   |   |   |   |   |   |   |   |   |
|-----------|---|---|---|---|---|---|---|---|---|---|---|---|
| Smcr8     | 0 | 0 | 0 | 0 | 1 | 0 | 0 | 0 | 0 | 1 | 1 | 1 |
| Smg6      | 0 | 0 | 0 | 0 | 1 | 0 | 0 | 0 | 0 | 1 | 1 | 1 |
| Smpd3     | 0 | 0 | 0 | 0 | 0 | 0 | 0 | 1 | 0 | 1 | 1 | 1 |
| Smurf1    | 0 | 0 | 0 | 0 | 1 | 0 | 0 | 0 | 0 | 1 | 1 | 1 |
| Sncaip    | 0 | 0 | 0 | 0 | 1 | 0 | 0 | 0 | 0 | 1 | 1 | 1 |
| Snd1      | 0 | 0 | 0 | 0 | 0 | 1 | 0 | 0 | 0 | 1 | 1 | 1 |
| Snip1     | 0 | 0 | 0 | 0 | 1 | 0 | 0 | 0 | 0 | 1 | 1 | 1 |
| Snrnp200  | 0 | 0 | 0 | 0 | 1 | 0 | 0 | 0 | 0 | 1 | 1 | 1 |
| Sntb1     | 0 | 0 | 0 | 0 | 1 | 0 | 0 | 0 | 0 | 1 | 1 | 1 |
| Sntg1     | 0 | 0 | 0 | 0 | 1 | 0 | 0 | 0 | 0 | 1 | 1 | 1 |
| Snu13     | 0 | 0 | 0 | 0 | 1 | 0 | 0 | 0 | 0 | 1 | 1 | 1 |
| Snx8      | 0 | 0 | 0 | 0 | 1 | 0 | 0 | 0 | 0 | 1 | 1 | 1 |
| Soat1     | 0 | 0 | 0 | 0 | 1 | 0 | 0 | 0 | 0 | 1 | 1 | 1 |
| Sorcs2    | 0 | 0 | 0 | 0 | 1 | 0 | 0 | 0 | 0 | 1 | 1 | 1 |
| Sort1     | 0 | 0 | 0 | 0 | 1 | 0 | 0 | 0 | 0 | 1 | 1 | 1 |
| Sos2      | 0 | 0 | 0 | 0 | 1 | 0 | 0 | 0 | 0 | 1 | 1 | 1 |
| Sowahc    | 0 | 0 | 0 | 0 | 1 | 0 | 0 | 0 | 0 | 1 | 1 | 1 |
| Sox10     | 0 | 0 | 0 | 0 | 1 | 0 | 0 | 0 | 0 | 1 | 1 | 1 |
| Sox9      | 0 | 0 | 0 | 0 | 1 | 0 | 0 | 0 | 0 | 1 | 1 | 1 |
| Sp110     | 0 | 0 | 0 | 0 | 1 | 0 | 0 | 0 | 0 | 1 | 1 | 1 |
| Sp3       | 0 | 0 | 0 | 0 | 1 | 0 | 0 | 0 | 0 | 1 | 1 | 1 |
| Spag17    | 0 | 0 | 0 | 0 | 1 | 0 | 0 | 0 | 0 | 1 | 1 | 1 |
| Spag4     | 0 | 0 | 0 | 0 | 1 | 0 | 0 | 0 | 0 | 1 | 1 | 1 |
| Spag6     | 0 | 0 | 0 | 0 | 0 | 0 | 0 | 1 | 0 | 1 | 1 | 1 |
| Spata1    | 0 | 0 | 0 | 0 | 1 | 0 | 0 | 0 | 0 | 1 | 1 | 1 |
| Spata18   | 0 | 0 | 0 | 0 | 1 | 0 | 0 | 0 | 0 | 1 | 1 | 1 |
| Spata31d1 | 0 | 0 | 0 | 0 | 1 | 0 | 0 | 0 | 0 | 1 | 1 | 1 |
| Spata31d1 | 0 | 0 | 0 | 0 | 1 | 0 | 0 | 0 | 0 | 1 | 1 | 1 |
| Spata5    | 0 | 0 | 0 | 0 | 1 | 0 | 0 | 0 | 0 | 1 | 1 | 1 |
| Spatc1    | 0 | 0 | 0 | 0 | 0 | 0 | 0 | 1 | 0 | 1 | 1 | 1 |
| Spcs3     | 0 | 0 | 0 | 0 | 0 | 1 | 0 | 0 | 0 | 1 | 1 | 1 |
| Specc1    | 0 | 0 | 0 | 0 | 1 | 0 | 0 | 0 | 0 | 1 | 1 | 1 |
| Spg11     | 0 | 0 | 0 | 0 | 1 | 0 | 0 | 0 | 0 | 1 | 1 | 1 |

|            |   |   |   |   |   |   |   |   |   |   |   |   |
|------------|---|---|---|---|---|---|---|---|---|---|---|---|
| Sphk2      | 0 | 0 | 0 | 0 | 1 | 0 | 0 | 0 | 0 | 1 | 1 | 1 |
| Spink5     | 0 | 0 | 0 | 0 | 1 | 0 | 0 | 0 | 0 | 1 | 1 | 1 |
| Spinkl     | 0 | 0 | 0 | 0 | 1 | 0 | 0 | 0 | 0 | 1 | 1 | 1 |
| Spire1     | 0 | 0 | 0 | 0 | 1 | 0 | 0 | 0 | 0 | 1 | 1 | 1 |
| Sprr2e     | 0 | 0 | 0 | 0 | 1 | 0 | 0 | 0 | 0 | 1 | 1 | 1 |
| Sprtn      | 0 | 0 | 0 | 0 | 0 | 0 | 0 | 1 | 0 | 1 | 1 | 1 |
| Sptan1     | 0 | 0 | 0 | 0 | 1 | 0 | 0 | 0 | 0 | 1 | 1 | 1 |
| Sptb       | 0 | 0 | 0 | 0 | 1 | 0 | 0 | 0 | 0 | 1 | 1 | 1 |
| Sptbn1     | 0 | 0 | 0 | 0 | 1 | 0 | 0 | 0 | 0 | 1 | 1 | 1 |
| Sptbn4     | 0 | 0 | 0 | 0 | 1 | 0 | 0 | 0 | 0 | 1 | 1 | 1 |
| Sptlc2     | 0 | 0 | 0 | 0 | 1 | 0 | 0 | 0 | 0 | 1 | 1 | 1 |
| Sra1       | 0 | 0 | 0 | 0 | 1 | 0 | 0 | 0 | 0 | 1 | 1 | 1 |
| Srcin1     | 0 | 0 | 0 | 0 | 1 | 0 | 0 | 0 | 0 | 1 | 1 | 1 |
| Srpk2      | 0 | 0 | 0 | 0 | 1 | 0 | 0 | 0 | 0 | 1 | 1 | 1 |
| Srrm4      | 0 | 0 | 0 | 0 | 1 | 0 | 0 | 0 | 0 | 1 | 1 | 1 |
| Srsf5      | 0 | 0 | 0 | 0 | 1 | 0 | 0 | 0 | 0 | 1 | 1 | 1 |
| Srsf6      | 0 | 0 | 0 | 0 | 1 | 0 | 0 | 0 | 0 | 1 | 1 | 1 |
| Ssbp2      | 0 | 0 | 0 | 0 | 1 | 0 | 0 | 0 | 0 | 1 | 1 | 1 |
| Ssh1       | 0 | 0 | 0 | 0 | 1 | 0 | 0 | 0 | 0 | 1 | 1 | 1 |
| Ssh2       | 0 | 0 | 0 | 0 | 1 | 0 | 0 | 0 | 0 | 1 | 1 | 1 |
| Sspo       | 0 | 0 | 0 | 0 | 0 | 1 | 0 | 0 | 0 | 1 | 1 | 1 |
| Ssr3       | 0 | 0 | 0 | 0 | 1 | 0 | 0 | 0 | 0 | 1 | 1 | 1 |
| Sstr5      | 0 | 0 | 0 | 0 | 1 | 0 | 0 | 0 | 0 | 1 | 1 | 1 |
| St6galnac2 | 0 | 0 | 0 | 0 | 1 | 0 | 0 | 0 | 0 | 1 | 1 | 1 |
| Stab2      | 0 | 0 | 0 | 0 | 1 | 0 | 0 | 0 | 0 | 1 | 1 | 1 |
| Stard10    | 0 | 0 | 0 | 0 | 1 | 0 | 0 | 0 | 0 | 1 | 1 | 1 |
| Stard13    | 0 | 0 | 0 | 0 | 1 | 0 | 0 | 0 | 0 | 1 | 1 | 1 |
| Stard3nl   | 0 | 0 | 0 | 0 | 1 | 0 | 0 | 0 | 0 | 1 | 1 | 1 |
| Stard9     | 0 | 0 | 0 | 0 | 1 | 0 | 0 | 0 | 0 | 1 | 1 | 1 |
| Stat4      | 0 | 0 | 0 | 0 | 1 | 0 | 0 | 0 | 0 | 1 | 1 | 1 |
| Stc1       | 0 | 0 | 0 | 0 | 1 | 0 | 0 | 0 | 0 | 1 | 1 | 1 |
| Steap3     | 0 | 0 | 0 | 0 | 1 | 0 | 0 | 0 | 0 | 1 | 1 | 1 |
| Steap4     | 0 | 0 | 0 | 0 | 1 | 0 | 0 | 0 | 0 | 1 | 1 | 1 |

|          |   |   |   |   |   |   |   |   |   |   |   |   |
|----------|---|---|---|---|---|---|---|---|---|---|---|---|
| Stfa2l1  | 0 | 0 | 0 | 0 | 1 | 0 | 0 | 0 | 0 | 1 | 1 | 1 |
| Stkld1   | 0 | 0 | 0 | 0 | 1 | 0 | 0 | 0 | 0 | 1 | 1 | 1 |
| Ston2    | 0 | 0 | 0 | 0 | 1 | 0 | 0 | 0 | 0 | 1 | 1 | 1 |
| Stub1    | 0 | 0 | 0 | 0 | 1 | 0 | 0 | 0 | 0 | 1 | 1 | 1 |
| Stx2     | 0 | 0 | 0 | 0 | 1 | 0 | 0 | 0 | 0 | 1 | 1 | 1 |
| Stxbp3   | 0 | 0 | 0 | 0 | 1 | 0 | 0 | 0 | 0 | 1 | 1 | 1 |
| Sufu     | 0 | 0 | 0 | 0 | 1 | 0 | 0 | 0 | 0 | 1 | 1 | 1 |
| Sult1c2  | 0 | 0 | 0 | 0 | 0 | 1 | 0 | 0 | 0 | 1 | 1 | 1 |
| Sult2a1  | 0 | 0 | 0 | 0 | 1 | 0 | 0 | 0 | 0 | 1 | 1 | 1 |
| Sult2a3  | 0 | 0 | 0 | 0 | 0 | 1 | 0 | 0 | 0 | 1 | 1 | 1 |
| Sult2a4  | 0 | 0 | 0 | 0 | 1 | 0 | 0 | 0 | 0 | 1 | 1 | 1 |
| Sun2     | 0 | 0 | 0 | 0 | 1 | 0 | 0 | 0 | 0 | 1 | 1 | 1 |
| Sun3     | 0 | 0 | 0 | 0 | 1 | 0 | 0 | 0 | 0 | 1 | 1 | 1 |
| Svs6     | 0 | 0 | 0 | 0 | 1 | 0 | 0 | 0 | 0 | 1 | 1 | 1 |
| Sybu     | 0 | 0 | 0 | 0 | 1 | 0 | 0 | 0 | 0 | 1 | 1 | 1 |
| Sycp2    | 0 | 0 | 0 | 0 | 0 | 0 | 0 | 1 | 0 | 1 | 1 | 1 |
| Syde2    | 0 | 0 | 0 | 0 | 1 | 0 | 0 | 0 | 0 | 1 | 1 | 1 |
| Synpo2   | 0 | 0 | 0 | 0 | 1 | 0 | 0 | 0 | 0 | 1 | 1 | 1 |
| Syt10    | 0 | 0 | 0 | 0 | 1 | 0 | 0 | 0 | 0 | 1 | 1 | 1 |
| Syt4     | 0 | 0 | 0 | 0 | 1 | 0 | 0 | 0 | 0 | 1 | 1 | 1 |
| Sytl2    | 0 | 0 | 0 | 0 | 1 | 0 | 0 | 0 | 0 | 1 | 1 | 1 |
| Szt2     | 0 | 0 | 0 | 0 | 1 | 0 | 0 | 0 | 0 | 1 | 1 | 1 |
| Tacc2    | 0 | 0 | 0 | 0 | 1 | 0 | 0 | 0 | 0 | 1 | 1 | 1 |
| Tacc3    | 0 | 0 | 0 | 0 | 1 | 0 | 0 | 0 | 0 | 1 | 1 | 1 |
| Taco1    | 0 | 0 | 0 | 0 | 1 | 0 | 0 | 0 | 0 | 1 | 1 | 1 |
| Tacr1    | 0 | 0 | 0 | 0 | 1 | 0 | 0 | 0 | 0 | 1 | 1 | 1 |
| Tada1    | 0 | 0 | 0 | 0 | 1 | 0 | 0 | 0 | 0 | 1 | 1 | 1 |
| Taf1     | 0 | 0 | 0 | 0 | 1 | 0 | 0 | 0 | 0 | 1 | 1 | 1 |
| Taf6l    | 0 | 0 | 0 | 0 | 1 | 0 | 0 | 0 | 0 | 1 | 1 | 1 |
| Tagap    | 0 | 0 | 0 | 0 | 1 | 0 | 0 | 0 | 0 | 1 | 1 | 1 |
| Tap1     | 0 | 0 | 0 | 0 | 1 | 0 | 0 | 0 | 0 | 1 | 1 | 1 |
| Tapbpl   | 0 | 0 | 0 | 0 | 1 | 0 | 0 | 0 | 0 | 1 | 1 | 1 |
| Tas2r123 | 0 | 0 | 0 | 0 | 1 | 0 | 0 | 0 | 0 | 1 | 1 | 1 |



|          |   |   |   |   |   |   |   |   |   |   |   |   |
|----------|---|---|---|---|---|---|---|---|---|---|---|---|
| Tas2r125 | 0 | 0 | 0 | 0 | 1 | 0 | 0 | 0 | 0 | 1 | 1 | 1 |
| Tas2r135 | 0 | 0 | 0 | 0 | 1 | 0 | 0 | 0 | 0 | 1 | 1 | 1 |
| Tat      | 0 | 0 | 0 | 0 | 0 | 0 | 0 | 1 | 0 | 1 | 1 | 1 |
| Tbc1d22b | 0 | 0 | 0 | 0 | 1 | 0 | 0 | 0 | 0 | 1 | 1 | 1 |
| Tbc1d4   | 0 | 0 | 0 | 0 | 1 | 0 | 0 | 0 | 0 | 1 | 1 | 1 |
| Tbx22    | 0 | 0 | 0 | 0 | 1 | 0 | 0 | 0 | 0 | 1 | 1 | 1 |
| Tbx6     | 0 | 0 | 0 | 0 | 1 | 0 | 0 | 0 | 0 | 1 | 1 | 1 |
| Tcaf2    | 0 | 0 | 0 | 0 | 1 | 0 | 0 | 0 | 0 | 1 | 1 | 1 |
| Tcam1    | 0 | 0 | 0 | 0 | 1 | 0 | 0 | 0 | 0 | 1 | 1 | 1 |
| Tchh     | 0 | 0 | 0 | 0 | 1 | 0 | 0 | 0 | 0 | 1 | 1 | 1 |
| Tcn2     | 0 | 0 | 0 | 0 | 1 | 0 | 0 | 0 | 0 | 1 | 1 | 1 |
| Tcof1    | 0 | 0 | 0 | 0 | 1 | 0 | 0 | 0 | 0 | 1 | 1 | 1 |
| Tdpoz1   | 0 | 0 | 0 | 0 | 1 | 0 | 0 | 0 | 0 | 1 | 1 | 1 |
| Tdrd6    | 0 | 0 | 0 | 0 | 1 | 0 | 0 | 0 | 0 | 1 | 1 | 1 |
| Tec      | 0 | 0 | 0 | 0 | 1 | 0 | 0 | 0 | 0 | 1 | 1 | 1 |
| Tecpr1   | 0 | 0 | 0 | 0 | 1 | 0 | 0 | 0 | 0 | 1 | 1 | 1 |
| Tek      | 0 | 0 | 0 | 0 | 1 | 0 | 0 | 0 | 0 | 1 | 1 | 1 |
| Tenm1    | 0 | 0 | 0 | 0 | 1 | 0 | 0 | 0 | 0 | 1 | 1 | 1 |
| Tenm2    | 0 | 0 | 0 | 0 | 1 | 0 | 0 | 0 | 0 | 1 | 1 | 1 |
| Tenm4    | 0 | 0 | 0 | 0 | 1 | 0 | 0 | 0 | 0 | 1 | 1 | 1 |
| Tes3-ps  | 0 | 0 | 0 | 0 | 1 | 0 | 0 | 0 | 0 | 1 | 1 | 1 |
| Tespa1   | 0 | 0 | 0 | 0 | 1 | 0 | 0 | 0 | 0 | 1 | 1 | 1 |
| Tfip11   | 0 | 0 | 0 | 0 | 1 | 0 | 0 | 0 | 0 | 1 | 1 | 1 |
| Tg       | 0 | 0 | 0 | 0 | 1 | 0 | 0 | 0 | 0 | 1 | 1 | 1 |
| Tgm3     | 0 | 0 | 0 | 0 | 1 | 0 | 0 | 0 | 0 | 1 | 1 | 1 |
| Thap12   | 0 | 0 | 0 | 0 | 1 | 0 | 0 | 0 | 0 | 1 | 1 | 1 |
| Thbs2    | 0 | 0 | 0 | 0 | 1 | 0 | 0 | 0 | 0 | 1 | 1 | 1 |
| Thbs3    | 0 | 0 | 0 | 0 | 1 | 0 | 0 | 0 | 0 | 1 | 1 | 1 |
| Thegl    | 0 | 0 | 0 | 0 | 1 | 0 | 0 | 0 | 0 | 1 | 1 | 1 |
| Themis   | 0 | 0 | 0 | 0 | 1 | 0 | 0 | 0 | 0 | 1 | 1 | 1 |
| Thpo     | 0 | 0 | 0 | 0 | 1 | 0 | 0 | 0 | 0 | 1 | 1 | 1 |
| Thsd4    | 0 | 0 | 0 | 0 | 1 | 0 | 0 | 0 | 0 | 1 | 1 | 1 |
| Thy1     | 0 | 0 | 0 | 0 | 1 | 0 | 0 | 0 | 0 | 1 | 1 | 1 |

|           |   |   |   |   |   |   |   |   |   |   |   |   |
|-----------|---|---|---|---|---|---|---|---|---|---|---|---|
| Tiam1     | 0 | 0 | 0 | 0 | 1 | 0 | 0 | 0 | 0 | 1 | 1 | 1 |
| Ticrr     | 0 | 0 | 0 | 0 | 1 | 0 | 0 | 0 | 0 | 1 | 1 | 1 |
| Tjp2      | 0 | 0 | 0 | 0 | 1 | 0 | 0 | 0 | 0 | 1 | 1 | 1 |
| Tkt       | 0 | 0 | 0 | 0 | 1 | 0 | 0 | 0 | 0 | 1 | 1 | 1 |
| Tldc2     | 0 | 0 | 0 | 0 | 1 | 0 | 0 | 0 | 0 | 1 | 1 | 1 |
| Tlk2      | 0 | 0 | 0 | 0 | 1 | 0 | 0 | 0 | 0 | 1 | 1 | 1 |
| Tln2      | 0 | 0 | 0 | 0 | 1 | 0 | 0 | 0 | 0 | 1 | 1 | 1 |
| Tlr11     | 0 | 0 | 0 | 0 | 1 | 0 | 0 | 0 | 0 | 1 | 1 | 1 |
| Tlr4      | 0 | 0 | 0 | 0 | 1 | 0 | 0 | 0 | 0 | 1 | 1 | 1 |
| Tm4sf5    | 0 | 0 | 0 | 0 | 1 | 0 | 0 | 0 | 0 | 1 | 1 | 1 |
| Tm9sf4    | 0 | 0 | 0 | 0 | 0 | 1 | 0 | 0 | 0 | 1 | 1 | 1 |
| Tmbim1    | 0 | 0 | 0 | 0 | 1 | 0 | 0 | 0 | 0 | 1 | 1 | 1 |
| Tmc5      | 0 | 0 | 0 | 0 | 0 | 0 | 0 | 1 | 0 | 1 | 1 | 1 |
| Tmc7      | 0 | 0 | 0 | 0 | 1 | 0 | 0 | 0 | 0 | 1 | 1 | 1 |
| Tmed8     | 0 | 0 | 0 | 0 | 1 | 0 | 0 | 0 | 0 | 1 | 1 | 1 |
| Tmem102   | 0 | 0 | 0 | 0 | 1 | 0 | 0 | 0 | 0 | 1 | 1 | 1 |
| Tmem131l  | 0 | 0 | 0 | 0 | 1 | 0 | 0 | 0 | 0 | 1 | 1 | 1 |
| Tmem151k  | 0 | 0 | 0 | 0 | 1 | 0 | 0 | 0 | 0 | 1 | 1 | 1 |
| Tmem171   | 0 | 0 | 0 | 0 | 1 | 0 | 0 | 0 | 0 | 1 | 1 | 1 |
| Tmem173   | 0 | 0 | 0 | 0 | 1 | 0 | 0 | 0 | 0 | 1 | 1 | 1 |
| Tmem181a  | 0 | 0 | 0 | 0 | 0 | 0 | 0 | 1 | 0 | 1 | 1 | 1 |
| Tmem182   | 0 | 0 | 0 | 0 | 1 | 0 | 0 | 0 | 0 | 1 | 1 | 1 |
| Tmem207   | 0 | 0 | 0 | 0 | 1 | 0 | 0 | 0 | 0 | 1 | 1 | 1 |
| Tmem253   | 0 | 0 | 0 | 0 | 1 | 0 | 0 | 0 | 0 | 1 | 1 | 1 |
| Tmem45a   | 0 | 0 | 0 | 0 | 1 | 0 | 0 | 0 | 0 | 1 | 1 | 1 |
| Tmem56    | 0 | 0 | 0 | 0 | 1 | 0 | 0 | 0 | 0 | 1 | 1 | 1 |
| Tmem63a   | 0 | 0 | 0 | 0 | 1 | 0 | 0 | 0 | 0 | 1 | 1 | 1 |
| Tmem8     | 0 | 0 | 0 | 0 | 1 | 0 | 0 | 0 | 0 | 1 | 1 | 1 |
| Tmem94    | 0 | 0 | 0 | 0 | 1 | 0 | 0 | 0 | 0 | 1 | 1 | 1 |
| Tmigd3    | 0 | 0 | 0 | 0 | 1 | 0 | 0 | 0 | 0 | 1 | 1 | 1 |
| Tmod3     | 0 | 0 | 0 | 0 | 1 | 0 | 0 | 0 | 0 | 1 | 1 | 1 |
| Tmprss11d | 0 | 0 | 0 | 0 | 0 | 0 | 0 | 1 | 0 | 1 | 1 | 1 |
| Tmprss11g | 0 | 0 | 0 | 0 | 1 | 0 | 0 | 0 | 0 | 1 | 1 | 1 |

|            |   |   |   |   |   |   |   |   |   |   |   |   |
|------------|---|---|---|---|---|---|---|---|---|---|---|---|
| Tmprss9    | 0 | 0 | 0 | 0 | 1 | 0 | 0 | 0 | 0 | 1 | 1 | 1 |
| Tmub1      | 0 | 0 | 0 | 0 | 1 | 0 | 0 | 0 | 0 | 1 | 1 | 1 |
| Tmx2       | 0 | 0 | 0 | 0 | 0 | 0 | 0 | 1 | 0 | 1 | 1 | 1 |
| Tnc        | 0 | 0 | 0 | 0 | 0 | 1 | 0 | 0 | 0 | 1 | 1 | 1 |
| Tnn        | 0 | 0 | 0 | 0 | 1 | 0 | 0 | 0 | 0 | 1 | 1 | 1 |
| Tnpo3      | 0 | 0 | 0 | 0 | 1 | 0 | 0 | 0 | 0 | 1 | 1 | 1 |
| Tom1       | 0 | 0 | 0 | 0 | 1 | 0 | 0 | 0 | 0 | 1 | 1 | 1 |
| Top1mt     | 0 | 0 | 0 | 0 | 1 | 0 | 0 | 0 | 0 | 1 | 1 | 1 |
| Topors     | 0 | 0 | 0 | 0 | 1 | 0 | 0 | 0 | 0 | 1 | 1 | 1 |
| Tor1aip1   | 0 | 0 | 0 | 0 | 1 | 0 | 0 | 0 | 0 | 1 | 1 | 1 |
| Tpcn1      | 0 | 0 | 0 | 0 | 1 | 0 | 0 | 0 | 0 | 1 | 1 | 1 |
| Tpcn2      | 0 | 0 | 0 | 0 | 1 | 0 | 0 | 0 | 0 | 1 | 1 | 1 |
| Tph1       | 0 | 0 | 0 | 0 | 1 | 0 | 0 | 0 | 0 | 1 | 1 | 1 |
| Tpr        | 1 | 0 | 0 | 0 | 0 | 0 | 0 | 0 | 0 | 1 | 1 | 1 |
| Tpt1       | 0 | 0 | 0 | 0 | 1 | 0 | 0 | 0 | 0 | 1 | 1 | 1 |
| Trank1     | 0 | 0 | 0 | 0 | 1 | 0 | 0 | 0 | 0 | 1 | 1 | 1 |
| Trav15-1-d | 0 | 0 | 0 | 0 | 0 | 1 | 0 | 0 | 0 | 1 | 1 | 1 |
| Trav19     | 0 | 0 | 0 | 0 | 1 | 0 | 0 | 0 | 0 | 1 | 1 | 1 |
| Trim12c    | 0 | 0 | 0 | 0 | 0 | 1 | 0 | 0 | 0 | 1 | 1 | 1 |
| Trim25     | 0 | 0 | 0 | 0 | 1 | 0 | 0 | 0 | 0 | 1 | 1 | 1 |
| Trim28     | 0 | 0 | 0 | 0 | 1 | 0 | 0 | 0 | 0 | 1 | 1 | 1 |
| Trim37     | 0 | 0 | 0 | 0 | 1 | 0 | 0 | 0 | 0 | 1 | 1 | 1 |
| Trim43a    | 0 | 0 | 0 | 0 | 1 | 0 | 0 | 0 | 0 | 1 | 1 | 1 |
| Trim56     | 0 | 0 | 0 | 0 | 1 | 0 | 0 | 0 | 0 | 1 | 1 | 1 |
| Triml2     | 0 | 0 | 0 | 0 | 0 | 0 | 0 | 1 | 0 | 1 | 1 | 1 |
| Trmt44     | 0 | 0 | 0 | 0 | 0 | 1 | 0 | 0 | 0 | 1 | 1 | 1 |
| Trmt6      | 0 | 0 | 0 | 0 | 1 | 0 | 0 | 0 | 0 | 1 | 1 | 1 |
| Trp53      | 0 | 0 | 0 | 0 | 1 | 0 | 0 | 0 | 0 | 1 | 1 | 1 |
| Trp73      | 0 | 0 | 0 | 0 | 1 | 0 | 0 | 0 | 0 | 1 | 1 | 1 |
| Trpm2      | 0 | 0 | 0 | 0 | 1 | 0 | 0 | 0 | 0 | 1 | 1 | 1 |
| Trpm3      | 0 | 0 | 0 | 0 | 1 | 0 | 0 | 0 | 0 | 1 | 1 | 1 |
| Trub1      | 0 | 0 | 0 | 0 | 1 | 0 | 0 | 0 | 0 | 1 | 1 | 1 |
| Try4       | 0 | 0 | 0 | 0 | 1 | 0 | 0 | 0 | 0 | 1 | 1 | 1 |

|         |   |   |   |   |   |   |   |   |   |   |   |   |
|---------|---|---|---|---|---|---|---|---|---|---|---|---|
| Try5    | 0 | 0 | 0 | 0 | 1 | 0 | 0 | 0 | 0 | 1 | 1 | 1 |
| Tsga10  | 0 | 0 | 0 | 0 | 0 | 0 | 0 | 1 | 0 | 1 | 1 | 1 |
| Tshz3   | 0 | 0 | 0 | 0 | 1 | 0 | 0 | 0 | 0 | 1 | 1 | 1 |
| Tspan32 | 0 | 0 | 0 | 0 | 1 | 0 | 0 | 0 | 0 | 1 | 1 | 1 |
| Tspan5  | 0 | 0 | 0 | 0 | 1 | 0 | 0 | 0 | 0 | 1 | 1 | 1 |
| Tspan9  | 0 | 0 | 0 | 0 | 1 | 0 | 0 | 0 | 0 | 1 | 1 | 1 |
| Tssk1   | 0 | 0 | 0 | 0 | 0 | 1 | 0 | 0 | 0 | 1 | 1 | 1 |
| Ttc1    | 0 | 0 | 0 | 0 | 0 | 1 | 0 | 0 | 0 | 1 | 1 | 1 |
| Ttc16   | 0 | 0 | 0 | 0 | 1 | 0 | 0 | 0 | 0 | 1 | 1 | 1 |
| Ttc21b  | 0 | 0 | 0 | 0 | 1 | 0 | 0 | 0 | 0 | 1 | 1 | 1 |
| Ttc27   | 0 | 0 | 0 | 0 | 1 | 0 | 0 | 0 | 0 | 1 | 1 | 1 |
| Ttc28   | 0 | 0 | 0 | 0 | 1 | 0 | 0 | 0 | 0 | 1 | 1 | 1 |
| Ttc3    | 0 | 0 | 0 | 0 | 1 | 0 | 0 | 0 | 0 | 1 | 1 | 1 |
| Ttc34   | 0 | 0 | 0 | 0 | 1 | 0 | 0 | 0 | 0 | 1 | 1 | 1 |
| Ttc41   | 0 | 0 | 0 | 0 | 1 | 0 | 0 | 0 | 0 | 1 | 1 | 1 |
| Ttc6    | 0 | 0 | 0 | 0 | 0 | 0 | 0 | 1 | 0 | 1 | 1 | 1 |
| Ttc7    | 0 | 0 | 0 | 0 | 1 | 0 | 0 | 0 | 0 | 1 | 1 | 1 |
| Ttf2    | 0 | 0 | 0 | 0 | 1 | 0 | 0 | 0 | 0 | 1 | 1 | 1 |
| Tti2    | 0 | 0 | 0 | 0 | 1 | 0 | 0 | 0 | 0 | 1 | 1 | 1 |
| Ttk     | 0 | 0 | 0 | 0 | 1 | 0 | 0 | 0 | 0 | 1 | 1 | 1 |
| Ttl12   | 0 | 0 | 0 | 0 | 1 | 0 | 0 | 0 | 0 | 1 | 1 | 1 |
| Ttl6    | 0 | 0 | 0 | 0 | 0 | 0 | 0 | 1 | 0 | 1 | 1 | 1 |
| Ttl9    | 0 | 0 | 0 | 0 | 1 | 0 | 0 | 0 | 0 | 1 | 1 | 1 |
| Tubb1   | 0 | 0 | 0 | 0 | 1 | 0 | 0 | 0 | 0 | 1 | 1 | 1 |
| Tubb2a  | 0 | 0 | 0 | 0 | 1 | 0 | 0 | 0 | 0 | 1 | 1 | 1 |
| Tubb6   | 0 | 1 | 0 | 0 | 0 | 0 | 0 | 0 | 0 | 1 | 1 | 1 |
| Txndc2  | 0 | 0 | 0 | 0 | 1 | 0 | 0 | 0 | 0 | 1 | 1 | 1 |
| Tyk2    | 0 | 0 | 0 | 0 | 1 | 0 | 0 | 0 | 0 | 1 | 1 | 1 |
| U2surp  | 0 | 0 | 0 | 0 | 0 | 1 | 0 | 0 | 0 | 1 | 1 | 1 |
| Uaca    | 0 | 0 | 0 | 0 | 0 | 1 | 0 | 0 | 0 | 1 | 1 | 1 |
| Ubap2l  | 0 | 0 | 0 | 0 | 1 | 0 | 0 | 0 | 0 | 1 | 1 | 1 |
| Ubash3b | 0 | 0 | 0 | 0 | 1 | 0 | 0 | 0 | 0 | 1 | 1 | 1 |
| Ubc     | 0 | 0 | 0 | 0 | 1 | 0 | 0 | 0 | 0 | 1 | 1 | 1 |

|         |   |   |   |   |   |   |   |   |   |   |   |   |
|---------|---|---|---|---|---|---|---|---|---|---|---|---|
| Ube2c   | 0 | 0 | 0 | 0 | 1 | 0 | 0 | 0 | 0 | 1 | 1 | 1 |
| Ube2k   | 0 | 0 | 0 | 0 | 1 | 0 | 0 | 0 | 0 | 1 | 1 | 1 |
| Ube2l6  | 0 | 0 | 0 | 0 | 1 | 0 | 0 | 0 | 0 | 1 | 1 | 1 |
| Ube3c   | 0 | 0 | 0 | 0 | 0 | 0 | 0 | 1 | 0 | 1 | 1 | 1 |
| Ubox5   | 0 | 0 | 0 | 0 | 1 | 0 | 0 | 0 | 0 | 1 | 1 | 1 |
| Ubqln1  | 0 | 0 | 0 | 0 | 0 | 1 | 0 | 0 | 0 | 1 | 1 | 1 |
| Uggt2   | 0 | 0 | 0 | 0 | 1 | 0 | 0 | 0 | 0 | 1 | 1 | 1 |
| Ugt2b34 | 0 | 0 | 0 | 0 | 1 | 0 | 0 | 0 | 0 | 1 | 1 | 1 |
| Ulk2    | 0 | 0 | 0 | 0 | 1 | 0 | 0 | 0 | 0 | 1 | 1 | 1 |
| Ulk4    | 0 | 0 | 0 | 0 | 1 | 0 | 0 | 0 | 0 | 1 | 1 | 1 |
| Unc13a  | 0 | 0 | 0 | 0 | 0 | 0 | 0 | 1 | 0 | 1 | 1 | 1 |
| Unc45a  | 0 | 0 | 0 | 0 | 1 | 0 | 0 | 0 | 0 | 1 | 1 | 1 |
| Unc5a   | 0 | 0 | 0 | 0 | 1 | 0 | 0 | 0 | 0 | 1 | 1 | 1 |
| Unc5cl  | 0 | 0 | 0 | 0 | 1 | 0 | 0 | 0 | 0 | 1 | 1 | 1 |
| Unc79   | 0 | 0 | 0 | 0 | 1 | 0 | 0 | 0 | 0 | 1 | 1 | 1 |
| Upk3b   | 0 | 0 | 0 | 0 | 1 | 0 | 0 | 0 | 0 | 1 | 1 | 1 |
| Urb1    | 0 | 0 | 0 | 0 | 1 | 0 | 0 | 0 | 0 | 1 | 1 | 1 |
| Uri1    | 0 | 0 | 0 | 0 | 0 | 0 | 0 | 1 | 0 | 1 | 1 | 1 |
| Usf3    | 0 | 0 | 0 | 0 | 1 | 0 | 0 | 0 | 0 | 1 | 1 | 1 |
| Uso1    | 0 | 0 | 0 | 0 | 1 | 0 | 0 | 0 | 0 | 1 | 1 | 1 |
| Usp11   | 0 | 0 | 0 | 0 | 1 | 0 | 0 | 0 | 0 | 1 | 1 | 1 |
| Usp17le | 0 | 0 | 0 | 0 | 1 | 0 | 0 | 0 | 0 | 1 | 1 | 1 |
| Usp21   | 0 | 0 | 0 | 0 | 1 | 0 | 0 | 0 | 0 | 1 | 1 | 1 |
| Usp28   | 0 | 0 | 0 | 0 | 0 | 0 | 0 | 1 | 0 | 1 | 1 | 1 |
| Usp33   | 0 | 0 | 0 | 0 | 1 | 0 | 0 | 0 | 0 | 1 | 1 | 1 |
| Usp34   | 0 | 0 | 0 | 0 | 1 | 0 | 0 | 0 | 0 | 1 | 1 | 1 |
| Usp35   | 0 | 0 | 0 | 0 | 1 | 0 | 0 | 0 | 0 | 1 | 1 | 1 |
| Usp37   | 0 | 0 | 0 | 0 | 1 | 0 | 0 | 0 | 0 | 1 | 1 | 1 |
| Usp38   | 0 | 0 | 0 | 0 | 1 | 0 | 0 | 0 | 0 | 1 | 1 | 1 |
| Usp4    | 0 | 0 | 0 | 0 | 1 | 0 | 0 | 0 | 0 | 1 | 1 | 1 |
| Usp48   | 0 | 0 | 0 | 0 | 0 | 1 | 0 | 0 | 0 | 1 | 1 | 1 |
| Usp5    | 0 | 0 | 0 | 0 | 1 | 0 | 0 | 0 | 0 | 1 | 1 | 1 |
| Usp8    | 0 | 0 | 0 | 0 | 1 | 0 | 0 | 0 | 0 | 1 | 1 | 1 |

|          |   |   |   |   |   |   |   |   |   |   |   |   |
|----------|---|---|---|---|---|---|---|---|---|---|---|---|
| Utp11    | 0 | 0 | 0 | 0 | 0 | 0 | 0 | 1 | 0 | 1 | 1 | 1 |
| Utp18    | 0 | 0 | 0 | 0 | 1 | 0 | 0 | 0 | 0 | 1 | 1 | 1 |
| Utrn     | 0 | 0 | 0 | 0 | 1 | 0 | 0 | 0 | 0 | 1 | 1 | 1 |
| Uty      | 0 | 0 | 0 | 0 | 1 | 0 | 0 | 0 | 0 | 1 | 1 | 1 |
| Vamp4    | 0 | 0 | 0 | 0 | 1 | 0 | 0 | 0 | 0 | 1 | 1 | 1 |
| Vapb     | 0 | 0 | 0 | 0 | 1 | 0 | 0 | 0 | 0 | 1 | 1 | 1 |
| Vegfc    | 0 | 0 | 0 | 0 | 0 | 0 | 0 | 1 | 0 | 1 | 1 | 1 |
| Vldlr    | 0 | 0 | 0 | 0 | 1 | 0 | 0 | 0 | 0 | 1 | 1 | 1 |
| Vmn1r125 | 0 | 0 | 0 | 0 | 1 | 0 | 0 | 0 | 0 | 1 | 1 | 1 |
| Vmn1r14  | 0 | 0 | 0 | 0 | 1 | 0 | 0 | 0 | 0 | 1 | 1 | 1 |
| Vmn1r174 | 0 | 0 | 0 | 0 | 1 | 0 | 0 | 0 | 0 | 1 | 1 | 1 |
| Vmn1r178 | 0 | 0 | 0 | 0 | 1 | 0 | 0 | 0 | 0 | 1 | 1 | 1 |
| Vmn1r194 | 0 | 0 | 0 | 0 | 1 | 0 | 0 | 0 | 0 | 1 | 1 | 1 |
| Vmn1r200 | 0 | 0 | 0 | 0 | 1 | 0 | 0 | 0 | 0 | 1 | 1 | 1 |
| Vmn1r216 | 0 | 0 | 0 | 0 | 1 | 0 | 0 | 0 | 0 | 1 | 1 | 1 |
| Vmn1r38  | 0 | 0 | 1 | 0 | 0 | 0 | 0 | 0 | 0 | 1 | 1 | 1 |
| Vmn1r74  | 0 | 0 | 0 | 0 | 1 | 0 | 0 | 0 | 0 | 1 | 1 | 1 |
| Vmn2r107 | 0 | 0 | 0 | 0 | 1 | 0 | 0 | 0 | 0 | 1 | 1 | 1 |
| Vmn2r108 | 0 | 0 | 0 | 0 | 1 | 0 | 0 | 0 | 0 | 1 | 1 | 1 |
| Vmn2r110 | 0 | 0 | 0 | 0 | 1 | 0 | 0 | 0 | 0 | 1 | 1 | 1 |
| Vmn2r111 | 0 | 0 | 0 | 0 | 0 | 1 | 0 | 0 | 0 | 1 | 1 | 1 |
| Vmn2r121 | 0 | 0 | 0 | 0 | 1 | 0 | 0 | 0 | 0 | 1 | 1 | 1 |
| Vmn2r13  | 0 | 0 | 0 | 0 | 1 | 0 | 0 | 0 | 0 | 1 | 1 | 1 |
| Vmn2r28  | 0 | 0 | 0 | 0 | 1 | 0 | 0 | 0 | 0 | 1 | 1 | 1 |
| Vmn2r31  | 0 | 0 | 0 | 0 | 1 | 0 | 0 | 0 | 0 | 1 | 1 | 1 |
| Vmn2r41  | 0 | 0 | 0 | 0 | 1 | 0 | 0 | 0 | 0 | 1 | 1 | 1 |
| Vmn2r44  | 0 | 0 | 0 | 0 | 1 | 0 | 0 | 0 | 0 | 1 | 1 | 1 |
| Vmn2r50  | 0 | 0 | 0 | 0 | 1 | 0 | 0 | 0 | 0 | 1 | 1 | 1 |
| Vmn2r59  | 0 | 0 | 0 | 0 | 1 | 0 | 0 | 0 | 0 | 1 | 1 | 1 |
| Vmn2r6   | 0 | 0 | 0 | 0 | 1 | 0 | 0 | 0 | 0 | 1 | 1 | 1 |
| Vmn2r61  | 0 | 0 | 0 | 0 | 1 | 0 | 0 | 0 | 0 | 1 | 1 | 1 |
| Vmn2r62  | 0 | 0 | 0 | 0 | 0 | 1 | 0 | 0 | 0 | 1 | 1 | 1 |
| Vmn2r66  | 0 | 0 | 0 | 0 | 1 | 0 | 0 | 0 | 0 | 1 | 1 | 1 |

|         |   |   |   |   |   |   |   |   |   |   |   |   |
|---------|---|---|---|---|---|---|---|---|---|---|---|---|
| Vmn2r68 | 0 | 0 | 0 | 0 | 1 | 0 | 0 | 0 | 0 | 1 | 1 | 1 |
| Vmn2r70 | 0 | 0 | 0 | 0 | 1 | 0 | 0 | 0 | 0 | 1 | 1 | 1 |
| Vmn2r80 | 0 | 0 | 0 | 0 | 1 | 0 | 0 | 0 | 0 | 1 | 1 | 1 |
| Vmn2r81 | 0 | 0 | 0 | 0 | 1 | 0 | 0 | 0 | 0 | 1 | 1 | 1 |
| Vmn2r84 | 0 | 0 | 0 | 0 | 1 | 0 | 0 | 0 | 0 | 1 | 1 | 1 |
| Vmn2r88 | 0 | 0 | 0 | 0 | 1 | 0 | 0 | 0 | 0 | 1 | 1 | 1 |
| Vmn2r94 | 0 | 0 | 0 | 0 | 1 | 0 | 0 | 0 | 0 | 1 | 1 | 1 |
| Vmn2r95 | 0 | 0 | 0 | 0 | 1 | 0 | 0 | 0 | 0 | 1 | 1 | 1 |
| Vmn2r96 | 1 | 0 | 0 | 0 | 0 | 0 | 0 | 0 | 0 | 1 | 1 | 1 |
| Vps11   | 0 | 0 | 0 | 0 | 1 | 0 | 0 | 0 | 0 | 1 | 1 | 1 |
| Vps13c  | 0 | 0 | 0 | 0 | 0 | 1 | 0 | 0 | 0 | 1 | 1 | 1 |
| Vps33b  | 0 | 0 | 0 | 0 | 1 | 0 | 0 | 0 | 0 | 1 | 1 | 1 |
| Vps35   | 0 | 0 | 0 | 0 | 1 | 0 | 0 | 0 | 0 | 1 | 1 | 1 |
| Vps39   | 0 | 0 | 0 | 0 | 1 | 0 | 0 | 0 | 0 | 1 | 1 | 1 |
| Vps51   | 0 | 0 | 0 | 0 | 1 | 0 | 0 | 0 | 0 | 1 | 1 | 1 |
| Vps9d1  | 0 | 0 | 0 | 0 | 0 | 0 | 0 | 1 | 0 | 1 | 1 | 1 |
| Vrk1    | 0 | 0 | 0 | 0 | 1 | 0 | 0 | 0 | 0 | 1 | 1 | 1 |
| Vsig2   | 0 | 0 | 0 | 0 | 1 | 0 | 0 | 0 | 0 | 1 | 1 | 1 |
| Vsnl1   | 0 | 0 | 0 | 0 | 1 | 0 | 0 | 0 | 0 | 1 | 1 | 1 |
| Vwa5a   | 0 | 0 | 0 | 0 | 1 | 0 | 0 | 0 | 0 | 1 | 1 | 1 |
| Vwa8    | 0 | 0 | 0 | 0 | 1 | 0 | 0 | 0 | 0 | 1 | 1 | 1 |
| Vwce    | 0 | 0 | 0 | 0 | 1 | 0 | 0 | 0 | 0 | 1 | 1 | 1 |
| Wars    | 0 | 0 | 0 | 0 | 0 | 1 | 0 | 0 | 0 | 1 | 1 | 1 |
| Wbp2    | 0 | 0 | 0 | 0 | 1 | 0 | 0 | 0 | 0 | 1 | 1 | 1 |
| Wdpcp   | 0 | 0 | 0 | 0 | 1 | 0 | 0 | 0 | 0 | 1 | 1 | 1 |
| Wdr25   | 0 | 0 | 0 | 0 | 1 | 0 | 0 | 0 | 0 | 1 | 1 | 1 |
| Wdr33   | 0 | 0 | 0 | 0 | 1 | 0 | 0 | 0 | 0 | 1 | 1 | 1 |
| Wdr54   | 0 | 0 | 0 | 0 | 1 | 0 | 0 | 0 | 0 | 1 | 1 | 1 |
| Wdr6    | 0 | 0 | 0 | 0 | 1 | 0 | 0 | 0 | 0 | 1 | 1 | 1 |
| Wdr91   | 0 | 0 | 0 | 0 | 1 | 0 | 0 | 0 | 0 | 1 | 1 | 1 |
| Wfikkn1 | 0 | 0 | 0 | 0 | 1 | 0 | 0 | 0 | 0 | 1 | 1 | 1 |
| Wisp3   | 0 | 0 | 0 | 0 | 1 | 0 | 0 | 0 | 0 | 1 | 1 | 1 |
| Wnk1    | 0 | 0 | 0 | 0 | 1 | 0 | 0 | 0 | 0 | 1 | 1 | 1 |

|         |   |   |   |   |   |   |   |   |   |   |   |   |
|---------|---|---|---|---|---|---|---|---|---|---|---|---|
| Wnk2    | 0 | 0 | 0 | 0 | 1 | 0 | 0 | 0 | 0 | 1 | 1 | 1 |
| Wscd2   | 0 | 0 | 0 | 0 | 1 | 0 | 0 | 0 | 0 | 1 | 1 | 1 |
| Wtap    | 0 | 0 | 0 | 0 | 1 | 0 | 0 | 0 | 0 | 1 | 1 | 1 |
| Wwp1    | 0 | 0 | 0 | 0 | 1 | 0 | 0 | 0 | 0 | 1 | 1 | 1 |
| Xiap    | 0 | 0 | 0 | 0 | 1 | 0 | 0 | 0 | 0 | 1 | 1 | 1 |
| Xk      | 0 | 0 | 0 | 0 | 1 | 0 | 0 | 0 | 0 | 1 | 1 | 1 |
| Xlr4b   | 0 | 0 | 0 | 0 | 1 | 0 | 0 | 0 | 0 | 1 | 1 | 1 |
| Xrcc4   | 0 | 0 | 0 | 0 | 1 | 0 | 0 | 0 | 0 | 1 | 1 | 1 |
| Yeats2  | 0 | 0 | 0 | 0 | 1 | 0 | 0 | 0 | 0 | 1 | 1 | 1 |
| Ylpm1   | 0 | 0 | 0 | 0 | 1 | 0 | 0 | 0 | 0 | 1 | 1 | 1 |
| Ythdc1  | 0 | 0 | 0 | 0 | 1 | 0 | 0 | 0 | 0 | 1 | 1 | 1 |
| Zbtb10  | 0 | 0 | 1 | 0 | 0 | 0 | 0 | 0 | 0 | 1 | 1 | 1 |
| Zbtb17  | 0 | 0 | 0 | 0 | 1 | 0 | 0 | 0 | 0 | 1 | 1 | 1 |
| Zbtb2   | 0 | 0 | 0 | 0 | 1 | 0 | 0 | 0 | 0 | 1 | 1 | 1 |
| Zbtb34  | 0 | 0 | 0 | 0 | 1 | 0 | 0 | 0 | 0 | 1 | 1 | 1 |
| Zbtb40  | 0 | 0 | 0 | 0 | 1 | 0 | 0 | 0 | 0 | 1 | 1 | 1 |
| Zbtb44  | 0 | 0 | 0 | 0 | 1 | 0 | 0 | 0 | 0 | 1 | 1 | 1 |
| Zbtb5   | 0 | 0 | 0 | 0 | 1 | 0 | 0 | 0 | 0 | 1 | 1 | 1 |
| Zc3h7b  | 0 | 0 | 0 | 0 | 1 | 0 | 0 | 0 | 0 | 1 | 1 | 1 |
| Zc4h2   | 0 | 0 | 0 | 0 | 1 | 0 | 0 | 0 | 0 | 1 | 1 | 1 |
| Zdhhc13 | 0 | 0 | 0 | 0 | 1 | 0 | 0 | 0 | 0 | 1 | 1 | 1 |
| Zdhhc17 | 0 | 0 | 0 | 0 | 1 | 0 | 0 | 0 | 0 | 1 | 1 | 1 |
| Zdhhc2  | 0 | 0 | 0 | 0 | 0 | 0 | 0 | 1 | 0 | 1 | 1 | 1 |
| Zdhhc22 | 0 | 0 | 0 | 0 | 1 | 0 | 0 | 0 | 0 | 1 | 1 | 1 |
| Zdhhc6  | 0 | 0 | 0 | 0 | 1 | 0 | 0 | 0 | 0 | 1 | 1 | 1 |
| Zeb1    | 0 | 0 | 0 | 0 | 1 | 0 | 0 | 0 | 0 | 1 | 1 | 1 |
| Zfc3h1  | 0 | 0 | 0 | 0 | 1 | 0 | 0 | 0 | 0 | 1 | 1 | 1 |
| Zfhx2   | 0 | 0 | 0 | 0 | 1 | 0 | 0 | 0 | 0 | 1 | 1 | 1 |
| Zfp12   | 0 | 0 | 0 | 0 | 1 | 0 | 0 | 0 | 0 | 1 | 1 | 1 |
| Zfp202  | 0 | 0 | 0 | 0 | 1 | 0 | 0 | 0 | 0 | 1 | 1 | 1 |
| Zfp263  | 0 | 0 | 0 | 0 | 1 | 0 | 0 | 0 | 0 | 1 | 1 | 1 |
| Zfp273  | 0 | 0 | 0 | 0 | 1 | 0 | 0 | 0 | 0 | 1 | 1 | 1 |
| Zfp282  | 0 | 0 | 0 | 0 | 1 | 0 | 0 | 0 | 0 | 1 | 1 | 1 |



|         |   |   |   |   |   |   |   |   |   |   |   |   |
|---------|---|---|---|---|---|---|---|---|---|---|---|---|
| Zfp318  | 0 | 0 | 0 | 0 | 1 | 0 | 0 | 0 | 0 | 1 | 1 | 1 |
| Zfp366  | 0 | 0 | 0 | 0 | 1 | 0 | 0 | 0 | 0 | 1 | 1 | 1 |
| Zfp369  | 0 | 0 | 0 | 0 | 1 | 0 | 0 | 0 | 0 | 1 | 1 | 1 |
| Zfp3612 | 0 | 0 | 1 | 0 | 0 | 0 | 0 | 0 | 0 | 1 | 1 | 1 |
| Zfp385a | 0 | 0 | 0 | 0 | 1 | 0 | 0 | 0 | 0 | 1 | 1 | 1 |
| Zfp429  | 0 | 0 | 0 | 0 | 1 | 0 | 0 | 0 | 0 | 1 | 1 | 1 |
| Zfp438  | 0 | 0 | 0 | 0 | 1 | 0 | 0 | 0 | 0 | 1 | 1 | 1 |
| Zfp451  | 0 | 0 | 0 | 0 | 1 | 0 | 0 | 0 | 0 | 1 | 1 | 1 |
| Zfp458  | 0 | 0 | 0 | 0 | 0 | 1 | 0 | 0 | 0 | 1 | 1 | 1 |
| Zfp507  | 0 | 0 | 0 | 0 | 1 | 0 | 0 | 0 | 0 | 1 | 1 | 1 |
| Zfp513  | 0 | 0 | 0 | 0 | 1 | 0 | 0 | 0 | 0 | 1 | 1 | 1 |
| Zfp536  | 0 | 0 | 0 | 0 | 1 | 0 | 0 | 0 | 0 | 1 | 1 | 1 |
| Zfp563  | 0 | 0 | 0 | 0 | 1 | 0 | 0 | 0 | 0 | 1 | 1 | 1 |
| Zfp574  | 0 | 0 | 0 | 0 | 1 | 0 | 0 | 0 | 0 | 1 | 1 | 1 |
| Zfp609  | 0 | 0 | 0 | 0 | 1 | 0 | 0 | 0 | 0 | 1 | 1 | 1 |
| Zfp61   | 0 | 0 | 0 | 0 | 1 | 0 | 0 | 0 | 0 | 1 | 1 | 1 |
| Zfp687  | 0 | 0 | 0 | 0 | 1 | 0 | 0 | 0 | 0 | 1 | 1 | 1 |
| Zfp697  | 0 | 0 | 0 | 0 | 1 | 0 | 0 | 0 | 0 | 1 | 1 | 1 |
| Zfp729b | 0 | 0 | 0 | 0 | 1 | 0 | 0 | 0 | 0 | 1 | 1 | 1 |
| Zfp777  | 0 | 0 | 0 | 0 | 1 | 0 | 0 | 0 | 0 | 1 | 1 | 1 |
| Zfp787  | 0 | 0 | 0 | 0 | 1 | 0 | 0 | 0 | 0 | 1 | 1 | 1 |
| Zfp804b | 0 | 0 | 0 | 0 | 1 | 0 | 0 | 0 | 0 | 1 | 1 | 1 |
| Zfp846  | 0 | 0 | 0 | 0 | 1 | 0 | 0 | 0 | 0 | 1 | 1 | 1 |
| Zfp981  | 0 | 0 | 0 | 0 | 1 | 0 | 0 | 0 | 0 | 1 | 1 | 1 |
| Zfy2    | 0 | 0 | 0 | 0 | 1 | 0 | 0 | 0 | 0 | 1 | 1 | 1 |
| Zfyve16 | 0 | 0 | 0 | 0 | 1 | 0 | 0 | 0 | 0 | 1 | 1 | 1 |
| Zfyve26 | 0 | 0 | 0 | 0 | 1 | 0 | 0 | 0 | 0 | 1 | 1 | 1 |
| Zfyve9  | 0 | 0 | 0 | 0 | 1 | 0 | 0 | 0 | 0 | 1 | 1 | 1 |
| Zhx2    | 0 | 0 | 0 | 0 | 1 | 0 | 0 | 0 | 0 | 1 | 1 | 1 |
| Zkscan2 | 0 | 0 | 0 | 0 | 1 | 0 | 0 | 0 | 0 | 1 | 1 | 1 |
| Zmynd12 | 0 | 0 | 0 | 0 | 1 | 0 | 0 | 0 | 0 | 1 | 1 | 1 |
| Zmynd15 | 0 | 0 | 0 | 0 | 1 | 0 | 0 | 0 | 0 | 1 | 1 | 1 |
| Zp3r    | 0 | 0 | 0 | 0 | 1 | 0 | 0 | 0 | 0 | 1 | 1 | 1 |

|         |   |   |   |   |   |   |   |   |   |   |   |   |
|---------|---|---|---|---|---|---|---|---|---|---|---|---|
| Zpbp    | 0 | 0 | 0 | 0 | 1 | 0 | 0 | 0 | 0 | 1 | 1 | 1 |
| Zscan10 | 0 | 0 | 0 | 0 | 1 | 0 | 0 | 0 | 0 | 1 | 1 | 1 |
| Zswim8  | 0 | 0 | 0 | 0 | 1 | 0 | 0 | 0 | 0 | 1 | 1 | 1 |
| Zzz3    | 0 | 0 | 0 | 0 | 1 | 0 | 0 | 0 | 0 | 1 | 1 | 1 |

| Hugo_Sym  | Frame_Shi | Frame_Shi | In_Frame_ | In_Frame_ | Missense_ | Nonsense_ | Splice_Site | Translator total | MutatedSa | AlteredSamples |   |
|-----------|-----------|-----------|-----------|-----------|-----------|-----------|-------------|------------------|-----------|----------------|---|
| Muc6      | 0         | 0         | 0         | 0         | 10        | 0         | 0           | 0                | 10        | 5              | 5 |
| Sfi1      | 0         | 0         | 0         | 0         | 17        | 0         | 0           | 0                | 17        | 4              | 4 |
| 2410089EC | 0         | 0         | 0         | 0         | 5         | 1         | 1           | 0                | 7         | 4              | 4 |
| Pisd      | 0         | 0         | 0         | 0         | 6         | 0         | 0           | 0                | 6         | 4              | 4 |
| Vmn2r114  | 0         | 0         | 0         | 0         | 5         | 0         | 0           | 0                | 5         | 4              | 4 |
| Gm9758    | 0         | 0         | 0         | 1         | 3         | 0         | 0           | 0                | 4         | 4              | 4 |
| Nup205    | 0         | 0         | 0         | 0         | 4         | 0         | 0           | 0                | 4         | 4              | 4 |
| Pkd1l1    | 0         | 0         | 0         | 0         | 3         | 1         | 0           | 0                | 4         | 4              | 4 |
| Speer4e   | 0         | 0         | 0         | 0         | 4         | 0         | 0           | 0                | 4         | 4              | 4 |
| Tdpoz1    | 0         | 0         | 0         | 0         | 4         | 0         | 0           | 0                | 4         | 4              | 4 |
| Vmn1r3    | 0         | 0         | 0         | 0         | 4         | 0         | 0           | 0                | 4         | 4              | 4 |
| Adamts4   | 0         | 0         | 0         | 0         | 4         | 0         | 0           | 0                | 4         | 3              | 3 |
| Ctnnd1    | 0         | 0         | 0         | 0         | 4         | 0         | 0           | 0                | 4         | 3              | 3 |
| Golgb1    | 0         | 0         | 0         | 0         | 4         | 0         | 0           | 0                | 4         | 3              | 3 |
| Otog      | 0         | 0         | 0         | 0         | 4         | 0         | 0           | 0                | 4         | 3              | 3 |
| Rc3h1     | 0         | 0         | 0         | 0         | 4         | 0         | 0           | 0                | 4         | 3              | 3 |
| Sdk1      | 0         | 0         | 0         | 0         | 3         | 0         | 1           | 0                | 4         | 3              | 3 |
| Utrn      | 0         | 0         | 0         | 0         | 3         | 0         | 1           | 0                | 4         | 3              | 3 |
| Vmn2r117  | 0         | 0         | 0         | 0         | 4         | 0         | 0           | 0                | 4         | 3              | 3 |
| 1110059E2 | 0         | 0         | 0         | 0         | 0         | 0         | 3           | 0                | 3         | 3              | 3 |
| Adgrv1    | 0         | 0         | 0         | 0         | 3         | 0         | 0           | 0                | 3         | 3              | 3 |
| Alpk3     | 0         | 0         | 0         | 3         | 0         | 0         | 0           | 0                | 3         | 3              | 3 |
| Ank1      | 0         | 0         | 0         | 0         | 2         | 0         | 1           | 0                | 3         | 3              | 3 |
| Ccdc88a   | 0         | 0         | 0         | 0         | 3         | 0         | 0           | 0                | 3         | 3              | 3 |
| Clcn1     | 0         | 0         | 0         | 0         | 3         | 0         | 0           | 0                | 3         | 3              | 3 |
| Dmxl1     | 0         | 0         | 0         | 0         | 3         | 0         | 0           | 0                | 3         | 3              | 3 |
| Gm5862    | 0         | 0         | 0         | 0         | 3         | 0         | 0           | 0                | 3         | 3              | 3 |
| Helz2     | 0         | 0         | 0         | 0         | 3         | 0         | 0           | 0                | 3         | 3              | 3 |
| Klkb1     | 0         | 0         | 0         | 0         | 3         | 0         | 0           | 0                | 3         | 3              | 3 |
| Lrrk2     | 0         | 0         | 0         | 0         | 3         | 0         | 0           | 0                | 3         | 3              | 3 |
| Pdzd2     | 0         | 0         | 0         | 0         | 3         | 0         | 0           | 0                | 3         | 3              | 3 |
| Phka2     | 0         | 0         | 0         | 0         | 3         | 0         | 0           | 0                | 3         | 3              | 3 |

|          |   |   |   |   |   |   |   |   |   |   |   |
|----------|---|---|---|---|---|---|---|---|---|---|---|
| Plxnb1   | 0 | 0 | 0 | 0 | 2 | 0 | 1 | 0 | 3 | 3 | 3 |
| Prkdc    | 0 | 0 | 0 | 0 | 2 | 0 | 1 | 0 | 3 | 3 | 3 |
| Rimbp3   | 0 | 0 | 0 | 0 | 2 | 1 | 0 | 0 | 3 | 3 | 3 |
| Rxrg     | 0 | 0 | 0 | 0 | 3 | 0 | 0 | 0 | 3 | 3 | 3 |
| Tacc2    | 0 | 0 | 0 | 0 | 3 | 0 | 0 | 0 | 3 | 3 | 3 |
| Tmem132c | 0 | 0 | 0 | 0 | 3 | 0 | 0 | 0 | 3 | 3 | 3 |
| Tpr      | 0 | 0 | 0 | 0 | 3 | 0 | 0 | 0 | 3 | 3 | 3 |
| Vmn2r121 | 0 | 0 | 0 | 0 | 3 | 0 | 0 | 0 | 3 | 3 | 3 |
| Zfpm2    | 0 | 0 | 0 | 0 | 3 | 0 | 0 | 0 | 3 | 3 | 3 |
| Ankrd12  | 0 | 0 | 0 | 0 | 3 | 0 | 0 | 0 | 3 | 2 | 2 |
| Ankrd26  | 0 | 0 | 0 | 0 | 3 | 0 | 0 | 0 | 3 | 2 | 2 |
| Atxn2l   | 0 | 0 | 1 | 0 | 2 | 0 | 0 | 0 | 3 | 2 | 2 |
| C4b      | 0 | 0 | 0 | 0 | 2 | 0 | 1 | 0 | 3 | 2 | 2 |
| Cacna1d  | 0 | 0 | 0 | 0 | 2 | 0 | 1 | 0 | 3 | 2 | 2 |
| Caskin1  | 0 | 0 | 0 | 0 | 3 | 0 | 0 | 0 | 3 | 2 | 2 |
| Ccdc129  | 0 | 0 | 0 | 0 | 3 | 0 | 0 | 0 | 3 | 2 | 2 |
| Col4a5   | 0 | 0 | 0 | 0 | 3 | 0 | 0 | 0 | 3 | 2 | 2 |
| Cwc22    | 0 | 0 | 0 | 0 | 3 | 0 | 0 | 0 | 3 | 2 | 2 |
| Dnah7c   | 0 | 0 | 0 | 0 | 3 | 0 | 0 | 0 | 3 | 2 | 2 |
| Evpl     | 0 | 0 | 0 | 0 | 3 | 0 | 0 | 0 | 3 | 2 | 2 |
| Fat3     | 0 | 0 | 0 | 0 | 3 | 0 | 0 | 0 | 3 | 2 | 2 |
| Fsip2    | 0 | 0 | 0 | 0 | 3 | 0 | 0 | 0 | 3 | 2 | 2 |
| Gtf3c1   | 0 | 0 | 0 | 0 | 3 | 0 | 0 | 0 | 3 | 2 | 2 |
| Hmcn2    | 0 | 0 | 0 | 0 | 3 | 0 | 0 | 0 | 3 | 2 | 2 |
| Iws1     | 0 | 0 | 0 | 0 | 3 | 0 | 0 | 0 | 3 | 2 | 2 |
| Lmtk2    | 0 | 0 | 0 | 0 | 2 | 1 | 0 | 0 | 3 | 2 | 2 |
| Lyst     | 0 | 0 | 0 | 0 | 3 | 0 | 0 | 0 | 3 | 2 | 2 |
| Mga      | 0 | 0 | 0 | 0 | 3 | 0 | 0 | 0 | 3 | 2 | 2 |
| Nos1     | 0 | 0 | 0 | 0 | 2 | 0 | 1 | 0 | 3 | 2 | 2 |
| Npas4    | 0 | 0 | 0 | 0 | 3 | 0 | 0 | 0 | 3 | 2 | 2 |
| Plce1    | 0 | 0 | 0 | 0 | 2 | 1 | 0 | 0 | 3 | 2 | 2 |
| Ptgfrn   | 0 | 0 | 0 | 0 | 3 | 0 | 0 | 0 | 3 | 2 | 2 |
| Rars     | 0 | 0 | 0 | 0 | 3 | 0 | 0 | 0 | 3 | 2 | 2 |

|           |   |   |   |   |   |   |   |   |   |   |   |
|-----------|---|---|---|---|---|---|---|---|---|---|---|
| Sgms1     | 0 | 0 | 0 | 0 | 3 | 0 | 0 | 0 | 3 | 2 | 2 |
| Ttc39c    | 1 | 1 | 0 | 0 | 0 | 1 | 0 | 0 | 3 | 2 | 2 |
| Ubr4      | 0 | 0 | 0 | 0 | 3 | 0 | 0 | 0 | 3 | 2 | 2 |
| Vwc2l     | 0 | 0 | 0 | 0 | 2 | 0 | 1 | 0 | 3 | 2 | 2 |
| Zfp992    | 0 | 0 | 2 | 0 | 1 | 0 | 0 | 0 | 3 | 2 | 2 |
| 1190002N: | 0 | 0 | 0 | 0 | 2 | 0 | 0 | 0 | 2 | 2 | 2 |
| 2700049A( | 0 | 0 | 0 | 0 | 2 | 0 | 0 | 0 | 2 | 2 | 2 |
| 4931408C2 | 0 | 0 | 0 | 0 | 2 | 0 | 0 | 0 | 2 | 2 | 2 |
| A2m       | 0 | 0 | 0 | 0 | 2 | 0 | 0 | 0 | 2 | 2 | 2 |
| Aatk      | 0 | 0 | 0 | 0 | 2 | 0 | 0 | 0 | 2 | 2 | 2 |
| Abca1     | 0 | 0 | 0 | 0 | 1 | 0 | 1 | 0 | 2 | 2 | 2 |
| Abcc9     | 0 | 0 | 0 | 0 | 1 | 0 | 1 | 0 | 2 | 2 | 2 |
| Acacb     | 0 | 0 | 0 | 0 | 2 | 0 | 0 | 0 | 2 | 2 | 2 |
| Actr8     | 0 | 0 | 0 | 0 | 2 | 0 | 0 | 0 | 2 | 2 | 2 |
| Adcy3     | 0 | 0 | 0 | 0 | 2 | 0 | 0 | 0 | 2 | 2 | 2 |
| Adnp      | 0 | 0 | 0 | 0 | 2 | 0 | 0 | 0 | 2 | 2 | 2 |
| Adrb1     | 0 | 0 | 0 | 0 | 2 | 0 | 0 | 0 | 2 | 2 | 2 |
| Ago1      | 0 | 0 | 0 | 0 | 2 | 0 | 0 | 0 | 2 | 2 | 2 |
| Akap1     | 0 | 0 | 0 | 0 | 2 | 0 | 0 | 0 | 2 | 2 | 2 |
| Akap6     | 0 | 0 | 0 | 0 | 2 | 0 | 0 | 0 | 2 | 2 | 2 |
| Ankar     | 0 | 0 | 0 | 0 | 2 | 0 | 0 | 0 | 2 | 2 | 2 |
| Arhgef26  | 0 | 0 | 0 | 0 | 1 | 0 | 1 | 0 | 2 | 2 | 2 |
| Arid4b    | 0 | 0 | 0 | 0 | 0 | 0 | 2 | 0 | 2 | 2 | 2 |
| Ash1l     | 0 | 0 | 0 | 0 | 2 | 0 | 0 | 0 | 2 | 2 | 2 |
| Asxl2     | 0 | 0 | 0 | 0 | 2 | 0 | 0 | 0 | 2 | 2 | 2 |
| Asxl3     | 0 | 0 | 0 | 0 | 2 | 0 | 0 | 0 | 2 | 2 | 2 |
| Atp11b    | 0 | 0 | 0 | 0 | 2 | 0 | 0 | 0 | 2 | 2 | 2 |
| Atp2a2    | 0 | 0 | 0 | 0 | 2 | 0 | 0 | 0 | 2 | 2 | 2 |
| Atp9b     | 0 | 0 | 0 | 0 | 2 | 0 | 0 | 0 | 2 | 2 | 2 |
| Baz2b     | 0 | 0 | 0 | 0 | 2 | 0 | 0 | 0 | 2 | 2 | 2 |
| Bcl2l10   | 0 | 0 | 0 | 0 | 2 | 0 | 0 | 0 | 2 | 2 | 2 |
| Bcl6      | 0 | 0 | 0 | 0 | 2 | 0 | 0 | 0 | 2 | 2 | 2 |
| Birc6     | 0 | 0 | 0 | 0 | 2 | 0 | 0 | 0 | 2 | 2 | 2 |

|          |   |   |   |   |   |   |   |   |   |   |   |
|----------|---|---|---|---|---|---|---|---|---|---|---|
| Brca2    | 0 | 0 | 0 | 0 | 2 | 0 | 0 | 0 | 2 | 2 | 2 |
| Bricd5   | 0 | 0 | 0 | 0 | 2 | 0 | 0 | 0 | 2 | 2 | 2 |
| Brwd1    | 0 | 0 | 0 | 0 | 2 | 0 | 0 | 0 | 2 | 2 | 2 |
| Brwd3    | 0 | 0 | 0 | 0 | 2 | 0 | 0 | 0 | 2 | 2 | 2 |
| Caly     | 0 | 0 | 0 | 0 | 2 | 0 | 0 | 0 | 2 | 2 | 2 |
| Ccdc57   | 0 | 0 | 0 | 0 | 2 | 0 | 0 | 0 | 2 | 2 | 2 |
| Cct8l1   | 0 | 0 | 0 | 0 | 2 | 0 | 0 | 0 | 2 | 2 | 2 |
| Cdc42bpa | 0 | 0 | 0 | 0 | 2 | 0 | 0 | 0 | 2 | 2 | 2 |
| Cdk11b   | 0 | 0 | 0 | 0 | 2 | 0 | 0 | 0 | 2 | 2 | 2 |
| Celf1    | 0 | 0 | 0 | 0 | 2 | 0 | 0 | 0 | 2 | 2 | 2 |
| Chil4    | 0 | 0 | 0 | 0 | 1 | 0 | 1 | 0 | 2 | 2 | 2 |
| Chmp6    | 0 | 0 | 0 | 0 | 2 | 0 | 0 | 0 | 2 | 2 | 2 |
| Chst12   | 0 | 0 | 0 | 0 | 2 | 0 | 0 | 0 | 2 | 2 | 2 |
| Col5a2   | 0 | 0 | 0 | 0 | 2 | 0 | 0 | 0 | 2 | 2 | 2 |
| Col7a1   | 0 | 0 | 0 | 0 | 2 | 0 | 0 | 0 | 2 | 2 | 2 |
| Cpeb3    | 0 | 0 | 0 | 0 | 2 | 0 | 0 | 0 | 2 | 2 | 2 |
| Cpne9    | 0 | 0 | 0 | 0 | 0 | 2 | 0 | 0 | 2 | 2 | 2 |
| Cpsf1    | 0 | 0 | 0 | 0 | 2 | 0 | 0 | 0 | 2 | 2 | 2 |
| Csmd3    | 0 | 0 | 0 | 0 | 1 | 1 | 0 | 0 | 2 | 2 | 2 |
| Csnk1g1  | 0 | 0 | 0 | 0 | 0 | 2 | 0 | 0 | 2 | 2 | 2 |
| D430042O | 0 | 0 | 0 | 0 | 1 | 0 | 1 | 0 | 2 | 2 | 2 |
| Dag1     | 0 | 0 | 0 | 0 | 2 | 0 | 0 | 0 | 2 | 2 | 2 |
| Dcc      | 0 | 0 | 0 | 0 | 2 | 0 | 0 | 0 | 2 | 2 | 2 |
| Dchs1    | 0 | 0 | 0 | 0 | 1 | 1 | 0 | 0 | 2 | 2 | 2 |
| Dhx9     | 0 | 0 | 0 | 0 | 1 | 1 | 0 | 0 | 2 | 2 | 2 |
| Dlg5     | 0 | 0 | 0 | 0 | 2 | 0 | 0 | 0 | 2 | 2 | 2 |
| Dmc1     | 0 | 2 | 0 | 0 | 0 | 0 | 0 | 0 | 2 | 2 | 2 |
| Dnm3     | 0 | 0 | 0 | 0 | 2 | 0 | 0 | 0 | 2 | 2 | 2 |
| Dock7    | 0 | 0 | 0 | 0 | 2 | 0 | 0 | 0 | 2 | 2 | 2 |
| Dopey1   | 0 | 0 | 0 | 0 | 2 | 0 | 0 | 0 | 2 | 2 | 2 |
| Dsg1b    | 0 | 0 | 0 | 0 | 1 | 1 | 0 | 0 | 2 | 2 | 2 |
| Dst      | 0 | 0 | 0 | 0 | 2 | 0 | 0 | 0 | 2 | 2 | 2 |
| Eef2     | 0 | 0 | 0 | 0 | 2 | 0 | 0 | 0 | 2 | 2 | 2 |

|         |   |   |   |   |   |   |   |   |   |   |   |
|---------|---|---|---|---|---|---|---|---|---|---|---|
| Ep300   | 0 | 0 | 0 | 0 | 1 | 0 | 1 | 0 | 2 | 2 | 2 |
| Eps8l3  | 0 | 0 | 0 | 0 | 2 | 0 | 0 | 0 | 2 | 2 | 2 |
| Etf1    | 0 | 0 | 0 | 0 | 1 | 0 | 1 | 0 | 2 | 2 | 2 |
| F5      | 0 | 0 | 0 | 0 | 2 | 0 | 0 | 0 | 2 | 2 | 2 |
| F8      | 0 | 0 | 0 | 0 | 2 | 0 | 0 | 0 | 2 | 2 | 2 |
| Fam208a | 0 | 0 | 0 | 0 | 2 | 0 | 0 | 0 | 2 | 2 | 2 |
| Fanca   | 0 | 0 | 0 | 0 | 2 | 0 | 0 | 0 | 2 | 2 | 2 |
| Fgd1    | 0 | 0 | 0 | 0 | 1 | 0 | 1 | 0 | 2 | 2 | 2 |
| Foxk2   | 0 | 0 | 0 | 0 | 2 | 0 | 0 | 0 | 2 | 2 | 2 |
| Frmpd1  | 0 | 0 | 0 | 0 | 2 | 0 | 0 | 0 | 2 | 2 | 2 |
| Fryl    | 0 | 0 | 0 | 0 | 2 | 0 | 0 | 0 | 2 | 2 | 2 |
| Gk2     | 0 | 0 | 0 | 0 | 2 | 0 | 0 | 0 | 2 | 2 | 2 |
| Gm10220 | 0 | 0 | 0 | 0 | 2 | 0 | 0 | 0 | 2 | 2 | 2 |
| Gm20547 | 0 | 0 | 0 | 0 | 2 | 0 | 0 | 0 | 2 | 2 | 2 |
| Gm4788  | 0 | 0 | 0 | 0 | 2 | 0 | 0 | 0 | 2 | 2 | 2 |
| Grid2   | 0 | 0 | 0 | 0 | 2 | 0 | 0 | 0 | 2 | 2 | 2 |
| Gtf2i   | 0 | 0 | 0 | 0 | 2 | 0 | 0 | 0 | 2 | 2 | 2 |
| Henmt1  | 0 | 0 | 0 | 0 | 2 | 0 | 0 | 0 | 2 | 2 | 2 |
| Herc1   | 0 | 0 | 0 | 0 | 2 | 0 | 0 | 0 | 2 | 2 | 2 |
| Hgfac   | 0 | 0 | 0 | 0 | 2 | 0 | 0 | 0 | 2 | 2 | 2 |
| Hif1a   | 0 | 0 | 0 | 0 | 2 | 0 | 0 | 0 | 2 | 2 | 2 |
| Hmgxb3  | 0 | 0 | 0 | 0 | 2 | 0 | 0 | 0 | 2 | 2 | 2 |
| Hnrnpu  | 0 | 0 | 0 | 0 | 2 | 0 | 0 | 0 | 2 | 2 | 2 |
| Hr      | 0 | 0 | 0 | 0 | 2 | 0 | 0 | 0 | 2 | 2 | 2 |
| Ice1    | 0 | 0 | 0 | 0 | 2 | 0 | 0 | 0 | 2 | 2 | 2 |
| Igsf10  | 0 | 0 | 0 | 0 | 2 | 0 | 0 | 0 | 2 | 2 | 2 |
| Ildr1   | 0 | 0 | 0 | 0 | 2 | 0 | 0 | 0 | 2 | 2 | 2 |
| Immt    | 0 | 0 | 0 | 0 | 2 | 0 | 0 | 0 | 2 | 2 | 2 |
| Ints1   | 0 | 0 | 0 | 0 | 1 | 0 | 1 | 0 | 2 | 2 | 2 |
| Itga4   | 0 | 0 | 0 | 0 | 2 | 0 | 0 | 0 | 2 | 2 | 2 |
| Itga8   | 0 | 0 | 0 | 0 | 2 | 0 | 0 | 0 | 2 | 2 | 2 |
| Kcna7   | 0 | 0 | 0 | 0 | 2 | 0 | 0 | 0 | 2 | 2 | 2 |
| Kcnn4   | 0 | 0 | 0 | 0 | 2 | 0 | 0 | 0 | 2 | 2 | 2 |

|         |   |   |   |   |   |   |   |   |   |   |   |
|---------|---|---|---|---|---|---|---|---|---|---|---|
| Kif13b  | 0 | 0 | 0 | 0 | 2 | 0 | 0 | 0 | 2 | 2 | 2 |
| Kif5c   | 0 | 0 | 0 | 0 | 2 | 0 | 0 | 0 | 2 | 2 | 2 |
| Klhl23  | 0 | 0 | 0 | 0 | 2 | 0 | 0 | 0 | 2 | 2 | 2 |
| Kmt2b   | 0 | 0 | 0 | 0 | 2 | 0 | 0 | 0 | 2 | 2 | 2 |
| Kmt2c   | 0 | 0 | 0 | 0 | 2 | 0 | 0 | 0 | 2 | 2 | 2 |
| Kyat1   | 0 | 0 | 0 | 0 | 1 | 0 | 1 | 0 | 2 | 2 | 2 |
| Lad1    | 0 | 0 | 0 | 0 | 2 | 0 | 0 | 0 | 2 | 2 | 2 |
| Lama3   | 0 | 0 | 0 | 0 | 1 | 1 | 0 | 0 | 2 | 2 | 2 |
| Limk1   | 0 | 0 | 0 | 0 | 2 | 0 | 0 | 0 | 2 | 2 | 2 |
| Lrrc37a | 0 | 1 | 0 | 0 | 1 | 0 | 0 | 0 | 2 | 2 | 2 |
| Malt1   | 0 | 0 | 0 | 0 | 1 | 0 | 1 | 0 | 2 | 2 | 2 |
| Map3k13 | 0 | 0 | 0 | 0 | 2 | 0 | 0 | 0 | 2 | 2 | 2 |
| Mbd2    | 0 | 0 | 0 | 0 | 2 | 0 | 0 | 0 | 2 | 2 | 2 |
| Mcc     | 0 | 0 | 0 | 0 | 2 | 0 | 0 | 0 | 2 | 2 | 2 |
| Mcm3ap  | 0 | 0 | 0 | 0 | 1 | 0 | 1 | 0 | 2 | 2 | 2 |
| Med12l  | 0 | 0 | 0 | 0 | 1 | 1 | 0 | 0 | 2 | 2 | 2 |
| Med13   | 0 | 0 | 0 | 1 | 1 | 0 | 0 | 0 | 2 | 2 | 2 |
| Megf8   | 0 | 0 | 0 | 0 | 2 | 0 | 0 | 0 | 2 | 2 | 2 |
| Mfsd4b5 | 0 | 0 | 0 | 0 | 2 | 0 | 0 | 0 | 2 | 2 | 2 |
| Mmp14   | 0 | 0 | 0 | 0 | 2 | 0 | 0 | 0 | 2 | 2 | 2 |
| Mmrn1   | 0 | 0 | 0 | 0 | 2 | 0 | 0 | 0 | 2 | 2 | 2 |
| Mon2    | 0 | 0 | 0 | 0 | 1 | 1 | 0 | 0 | 2 | 2 | 2 |
| Mpv17   | 0 | 0 | 0 | 0 | 2 | 0 | 0 | 0 | 2 | 2 | 2 |
| Mroh1   | 0 | 0 | 0 | 0 | 2 | 0 | 0 | 0 | 2 | 2 | 2 |
| Mybbp1a | 0 | 0 | 0 | 0 | 2 | 0 | 0 | 0 | 2 | 2 | 2 |
| Myh7b   | 0 | 0 | 0 | 0 | 1 | 1 | 0 | 0 | 2 | 2 | 2 |
| Myh9    | 0 | 0 | 0 | 0 | 2 | 0 | 0 | 0 | 2 | 2 | 2 |
| Myo16   | 0 | 0 | 0 | 0 | 2 | 0 | 0 | 0 | 2 | 2 | 2 |
| Naa25   | 0 | 0 | 0 | 0 | 2 | 0 | 0 | 0 | 2 | 2 | 2 |
| Naa35   | 0 | 0 | 0 | 0 | 2 | 0 | 0 | 0 | 2 | 2 | 2 |
| Naca    | 0 | 0 | 0 | 0 | 2 | 0 | 0 | 0 | 2 | 2 | 2 |
| Nat9    | 0 | 0 | 0 | 0 | 0 | 1 | 1 | 0 | 2 | 2 | 2 |
| Nav3    | 0 | 0 | 0 | 0 | 2 | 0 | 0 | 0 | 2 | 2 | 2 |



|         |   |   |   |   |   |   |   |   |   |   |   |
|---------|---|---|---|---|---|---|---|---|---|---|---|
| Ndc80   | 0 | 0 | 0 | 0 | 1 | 1 | 0 | 0 | 2 | 2 | 2 |
| Nfe2l2  | 0 | 0 | 0 | 0 | 2 | 0 | 0 | 0 | 2 | 2 | 2 |
| Nfia    | 0 | 0 | 0 | 0 | 2 | 0 | 0 | 0 | 2 | 2 | 2 |
| Nin     | 0 | 0 | 0 | 0 | 1 | 1 | 0 | 0 | 2 | 2 | 2 |
| Nlrc4   | 1 | 0 | 0 | 0 | 0 | 0 | 1 | 0 | 2 | 2 | 2 |
| Nudcd1  | 0 | 0 | 0 | 0 | 2 | 0 | 0 | 0 | 2 | 2 | 2 |
| Nufip2  | 0 | 0 | 0 | 0 | 2 | 0 | 0 | 0 | 2 | 2 | 2 |
| Olf1131 | 0 | 0 | 0 | 0 | 2 | 0 | 0 | 0 | 2 | 2 | 2 |
| Olf1197 | 0 | 0 | 0 | 0 | 2 | 0 | 0 | 0 | 2 | 2 | 2 |
| Olf1247 | 0 | 0 | 0 | 0 | 2 | 0 | 0 | 0 | 2 | 2 | 2 |
| Olf344  | 0 | 0 | 0 | 0 | 2 | 0 | 0 | 0 | 2 | 2 | 2 |
| Osbpl6  | 0 | 0 | 0 | 0 | 2 | 0 | 0 | 0 | 2 | 2 | 2 |
| Parp4   | 0 | 0 | 0 | 0 | 2 | 0 | 0 | 0 | 2 | 2 | 2 |
| Pax4    | 0 | 0 | 0 | 0 | 2 | 0 | 0 | 0 | 2 | 2 | 2 |
| Pcdh7   | 0 | 0 | 0 | 0 | 2 | 0 | 0 | 0 | 2 | 2 | 2 |
| Pcdhb12 | 0 | 0 | 0 | 0 | 2 | 0 | 0 | 0 | 2 | 2 | 2 |
| Pcdhga9 | 0 | 0 | 0 | 0 | 2 | 0 | 0 | 0 | 2 | 2 | 2 |
| Pclo    | 0 | 0 | 0 | 0 | 1 | 1 | 0 | 0 | 2 | 2 | 2 |
| Pcnx2   | 0 | 0 | 0 | 0 | 2 | 0 | 0 | 0 | 2 | 2 | 2 |
| Pcsk6   | 0 | 0 | 0 | 0 | 1 | 0 | 1 | 0 | 2 | 2 | 2 |
| Pdcd1   | 0 | 0 | 0 | 0 | 1 | 0 | 1 | 0 | 2 | 2 | 2 |
| Peg3    | 0 | 0 | 0 | 0 | 2 | 0 | 0 | 0 | 2 | 2 | 2 |
| Pgm1    | 0 | 0 | 0 | 0 | 2 | 0 | 0 | 0 | 2 | 2 | 2 |
| Pik3c2a | 0 | 0 | 0 | 0 | 2 | 0 | 0 | 0 | 2 | 2 | 2 |
| Pik3r5  | 0 | 0 | 0 | 0 | 2 | 0 | 0 | 0 | 2 | 2 | 2 |
| Pip4k2a | 0 | 0 | 0 | 0 | 2 | 0 | 0 | 0 | 2 | 2 | 2 |
| Pla2g6  | 0 | 0 | 0 | 0 | 2 | 0 | 0 | 0 | 2 | 2 | 2 |
| Plch1   | 0 | 0 | 0 | 0 | 2 | 0 | 0 | 0 | 2 | 2 | 2 |
| Plekhg2 | 0 | 0 | 0 | 0 | 2 | 0 | 0 | 0 | 2 | 2 | 2 |
| Plekhh2 | 0 | 0 | 0 | 0 | 2 | 0 | 0 | 0 | 2 | 2 | 2 |
| Plpp5   | 0 | 0 | 0 | 0 | 1 | 1 | 0 | 0 | 2 | 2 | 2 |
| Pnpla2  | 0 | 0 | 0 | 0 | 2 | 0 | 0 | 0 | 2 | 2 | 2 |
| Polq    | 0 | 0 | 0 | 0 | 1 | 1 | 0 | 0 | 2 | 2 | 2 |

|         |   |   |   |   |   |   |   |   |   |   |   |
|---------|---|---|---|---|---|---|---|---|---|---|---|
| Prdm9   | 0 | 0 | 1 | 0 | 1 | 0 | 0 | 0 | 2 | 2 | 2 |
| Prex2   | 0 | 0 | 0 | 0 | 2 | 0 | 0 | 0 | 2 | 2 | 2 |
| Prg4    | 0 | 0 | 0 | 0 | 2 | 0 | 0 | 0 | 2 | 2 | 2 |
| Prrc2c  | 0 | 0 | 0 | 0 | 2 | 0 | 0 | 0 | 2 | 2 | 2 |
| Psg22   | 0 | 0 | 0 | 0 | 2 | 0 | 0 | 0 | 2 | 2 | 2 |
| Psip1   | 0 | 0 | 0 | 0 | 2 | 0 | 0 | 0 | 2 | 2 | 2 |
| Psmc1   | 0 | 0 | 0 | 0 | 2 | 0 | 0 | 0 | 2 | 2 | 2 |
| Ptk2    | 0 | 0 | 0 | 0 | 2 | 0 | 0 | 0 | 2 | 2 | 2 |
| Ptpn2   | 0 | 0 | 0 | 0 | 1 | 0 | 1 | 0 | 2 | 2 | 2 |
| Ptprc   | 0 | 0 | 0 | 0 | 2 | 0 | 0 | 0 | 2 | 2 | 2 |
| Pzp     | 0 | 0 | 0 | 0 | 1 | 0 | 1 | 0 | 2 | 2 | 2 |
| R3hdm2  | 0 | 0 | 0 | 0 | 2 | 0 | 0 | 0 | 2 | 2 | 2 |
| Rexo1   | 0 | 0 | 0 | 0 | 2 | 0 | 0 | 0 | 2 | 2 | 2 |
| Rhox2h  | 0 | 0 | 0 | 0 | 2 | 0 | 0 | 0 | 2 | 2 | 2 |
| Rnf103  | 0 | 0 | 0 | 0 | 1 | 1 | 0 | 0 | 2 | 2 | 2 |
| Robo1   | 0 | 0 | 0 | 0 | 2 | 0 | 0 | 0 | 2 | 2 | 2 |
| Ros1    | 0 | 0 | 0 | 0 | 0 | 2 | 0 | 0 | 2 | 2 | 2 |
| Rps6    | 0 | 0 | 0 | 0 | 2 | 0 | 0 | 0 | 2 | 2 | 2 |
| Scyl3   | 0 | 0 | 0 | 0 | 1 | 0 | 1 | 0 | 2 | 2 | 2 |
| Sel1l3  | 0 | 0 | 0 | 0 | 1 | 1 | 0 | 0 | 2 | 2 | 2 |
| Sema4b  | 0 | 0 | 0 | 0 | 2 | 0 | 0 | 0 | 2 | 2 | 2 |
| Sergef  | 0 | 0 | 0 | 0 | 1 | 0 | 1 | 0 | 2 | 2 | 2 |
| Setd1a  | 0 | 0 | 0 | 0 | 2 | 0 | 0 | 0 | 2 | 2 | 2 |
| Setdb1  | 0 | 0 | 0 | 0 | 2 | 0 | 0 | 0 | 2 | 2 | 2 |
| Sgcb    | 0 | 0 | 0 | 0 | 2 | 0 | 0 | 0 | 2 | 2 | 2 |
| Sh3d21  | 0 | 0 | 0 | 0 | 2 | 0 | 0 | 0 | 2 | 2 | 2 |
| Slc17a5 | 0 | 0 | 0 | 0 | 2 | 0 | 0 | 0 | 2 | 2 | 2 |
| Slc2a9  | 0 | 0 | 0 | 0 | 1 | 1 | 0 | 0 | 2 | 2 | 2 |
| Slc46a3 | 0 | 0 | 0 | 0 | 2 | 0 | 0 | 0 | 2 | 2 | 2 |
| Slco2a1 | 0 | 0 | 0 | 0 | 0 | 2 | 0 | 0 | 2 | 2 | 2 |
| Snx25   | 0 | 0 | 0 | 0 | 1 | 1 | 0 | 0 | 2 | 2 | 2 |
| Son     | 0 | 0 | 0 | 0 | 2 | 0 | 0 | 0 | 2 | 2 | 2 |
| Sorcs2  | 0 | 0 | 0 | 0 | 2 | 0 | 0 | 0 | 2 | 2 | 2 |

|          |   |   |   |   |   |   |   |   |   |   |   |
|----------|---|---|---|---|---|---|---|---|---|---|---|
| Sptbn1   | 0 | 0 | 0 | 0 | 1 | 1 | 0 | 0 | 2 | 2 | 2 |
| Sptbn4   | 0 | 0 | 0 | 0 | 2 | 0 | 0 | 0 | 2 | 2 | 2 |
| Srpr     | 0 | 0 | 0 | 0 | 1 | 0 | 1 | 0 | 2 | 2 | 2 |
| Ssh2     | 0 | 0 | 0 | 0 | 0 | 0 | 2 | 0 | 2 | 2 | 2 |
| Sspo     | 0 | 0 | 0 | 0 | 1 | 1 | 0 | 0 | 2 | 2 | 2 |
| Stk10    | 0 | 0 | 0 | 0 | 2 | 0 | 0 | 0 | 2 | 2 | 2 |
| Sympk    | 0 | 0 | 0 | 0 | 2 | 0 | 0 | 0 | 2 | 2 | 2 |
| Synrg    | 0 | 0 | 0 | 0 | 2 | 0 | 0 | 0 | 2 | 2 | 2 |
| Tapbp    | 0 | 0 | 0 | 0 | 2 | 0 | 0 | 0 | 2 | 2 | 2 |
| Tarbp1   | 0 | 0 | 0 | 0 | 2 | 0 | 0 | 0 | 2 | 2 | 2 |
| Tenm2    | 0 | 0 | 0 | 0 | 1 | 1 | 0 | 0 | 2 | 2 | 2 |
| Tert     | 0 | 0 | 0 | 0 | 2 | 0 | 0 | 0 | 2 | 2 | 2 |
| Ticam2   | 0 | 0 | 0 | 0 | 2 | 0 | 0 | 0 | 2 | 2 | 2 |
| Tln2     | 0 | 0 | 0 | 0 | 2 | 0 | 0 | 0 | 2 | 2 | 2 |
| Tmem232  | 0 | 0 | 0 | 0 | 2 | 0 | 0 | 0 | 2 | 2 | 2 |
| Tnks1bp1 | 0 | 0 | 0 | 0 | 1 | 1 | 0 | 0 | 2 | 2 | 2 |
| Tnr      | 0 | 0 | 0 | 0 | 2 | 0 | 0 | 0 | 2 | 2 | 2 |
| Trappc12 | 0 | 0 | 0 | 0 | 2 | 0 | 0 | 0 | 2 | 2 | 2 |
| Trim33   | 0 | 0 | 0 | 0 | 2 | 0 | 0 | 0 | 2 | 2 | 2 |
| Ttc3     | 0 | 0 | 0 | 0 | 1 | 0 | 1 | 0 | 2 | 2 | 2 |
| Txndc2   | 0 | 0 | 0 | 0 | 2 | 0 | 0 | 0 | 2 | 2 | 2 |
| U2af1l4  | 0 | 0 | 0 | 0 | 2 | 0 | 0 | 0 | 2 | 2 | 2 |
| Ubac1    | 0 | 0 | 0 | 0 | 1 | 0 | 1 | 0 | 2 | 2 | 2 |
| Ubxn7    | 0 | 0 | 0 | 0 | 2 | 0 | 0 | 0 | 2 | 2 | 2 |
| Ugt2a1   | 0 | 0 | 0 | 0 | 2 | 0 | 0 | 0 | 2 | 2 | 2 |
| Ugt2b37  | 0 | 0 | 0 | 0 | 2 | 0 | 0 | 0 | 2 | 2 | 2 |
| Unk      | 0 | 0 | 0 | 0 | 2 | 0 | 0 | 0 | 2 | 2 | 2 |
| Usp34    | 0 | 0 | 0 | 0 | 2 | 0 | 0 | 0 | 2 | 2 | 2 |
| Usp40    | 0 | 0 | 0 | 0 | 2 | 0 | 0 | 0 | 2 | 2 | 2 |
| Virma    | 0 | 0 | 0 | 0 | 2 | 0 | 0 | 0 | 2 | 2 | 2 |
| Vmn1r32  | 0 | 0 | 0 | 0 | 2 | 0 | 0 | 0 | 2 | 2 | 2 |
| Vmn2r104 | 0 | 0 | 0 | 0 | 2 | 0 | 0 | 0 | 2 | 2 | 2 |
| Vmn2r107 | 0 | 0 | 0 | 0 | 2 | 0 | 0 | 0 | 2 | 2 | 2 |

|           |   |   |   |   |   |   |   |   |   |   |   |
|-----------|---|---|---|---|---|---|---|---|---|---|---|
| Vmn2r8    | 0 | 0 | 0 | 0 | 2 | 0 | 0 | 0 | 2 | 2 | 2 |
| Vmn2r85   | 0 | 0 | 2 | 0 | 0 | 0 | 0 | 0 | 2 | 2 | 2 |
| Vps13a    | 0 | 0 | 0 | 0 | 2 | 0 | 0 | 0 | 2 | 2 | 2 |
| Wdr33     | 0 | 0 | 0 | 0 | 2 | 0 | 0 | 0 | 2 | 2 | 2 |
| Zdhhc13   | 0 | 0 | 0 | 0 | 2 | 0 | 0 | 0 | 2 | 2 | 2 |
| Zeb2      | 0 | 0 | 0 | 0 | 2 | 0 | 0 | 0 | 2 | 2 | 2 |
| Zfp169    | 0 | 0 | 0 | 0 | 2 | 0 | 0 | 0 | 2 | 2 | 2 |
| Zfp292    | 0 | 0 | 0 | 0 | 2 | 0 | 0 | 0 | 2 | 2 | 2 |
| Zfyve26   | 0 | 0 | 0 | 0 | 2 | 0 | 0 | 0 | 2 | 2 | 2 |
| Zswim4    | 0 | 0 | 0 | 0 | 2 | 0 | 0 | 0 | 2 | 2 | 2 |
| H2afy2    | 0 | 0 | 0 | 0 | 2 | 0 | 1 | 0 | 3 | 1 | 1 |
| Macf1     | 0 | 0 | 0 | 0 | 2 | 1 | 0 | 0 | 3 | 1 | 1 |
| Sec23a    | 0 | 0 | 0 | 0 | 3 | 0 | 0 | 0 | 3 | 1 | 1 |
| Shank1    | 0 | 0 | 0 | 0 | 3 | 0 | 0 | 0 | 3 | 1 | 1 |
| 2310050CC | 0 | 0 | 0 | 0 | 2 | 0 | 0 | 0 | 2 | 1 | 1 |
| 28104740C | 0 | 0 | 0 | 0 | 1 | 1 | 0 | 0 | 2 | 1 | 1 |
| Aars      | 0 | 0 | 0 | 0 | 2 | 0 | 0 | 0 | 2 | 1 | 1 |
| Acaca     | 0 | 0 | 0 | 0 | 2 | 0 | 0 | 0 | 2 | 1 | 1 |
| Adamts9   | 0 | 0 | 0 | 0 | 2 | 0 | 0 | 0 | 2 | 1 | 1 |
| Adcy1     | 0 | 0 | 0 | 0 | 2 | 0 | 0 | 0 | 2 | 1 | 1 |
| Adgrl2    | 0 | 0 | 0 | 0 | 2 | 0 | 0 | 0 | 2 | 1 | 1 |
| Afg3l1    | 0 | 0 | 0 | 0 | 2 | 0 | 0 | 0 | 2 | 1 | 1 |
| Akap9     | 0 | 0 | 0 | 0 | 2 | 0 | 0 | 0 | 2 | 1 | 1 |
| Arfgef3   | 0 | 0 | 0 | 0 | 2 | 0 | 0 | 0 | 2 | 1 | 1 |
| Baz1b     | 0 | 0 | 0 | 0 | 2 | 0 | 0 | 0 | 2 | 1 | 1 |
| Bcor      | 0 | 0 | 0 | 0 | 2 | 0 | 0 | 0 | 2 | 1 | 1 |
| Btbd1     | 0 | 0 | 0 | 0 | 1 | 0 | 1 | 0 | 2 | 1 | 1 |
| Cacna1g   | 0 | 0 | 0 | 0 | 1 | 1 | 0 | 0 | 2 | 1 | 1 |
| Cacng2    | 0 | 0 | 0 | 0 | 2 | 0 | 0 | 0 | 2 | 1 | 1 |
| Card6     | 0 | 0 | 0 | 0 | 2 | 0 | 0 | 0 | 2 | 1 | 1 |
| Catsperb  | 0 | 0 | 0 | 0 | 2 | 0 | 0 | 0 | 2 | 1 | 1 |
| Cbfa2t2   | 0 | 0 | 0 | 0 | 2 | 0 | 0 | 0 | 2 | 1 | 1 |
| Cel       | 0 | 0 | 0 | 0 | 2 | 0 | 0 | 0 | 2 | 1 | 1 |

|           |   |   |   |   |   |   |   |   |   |   |   |
|-----------|---|---|---|---|---|---|---|---|---|---|---|
| Cenpf     | 0 | 0 | 0 | 0 | 2 | 0 | 0 | 0 | 2 | 1 | 1 |
| Col4a3    | 0 | 0 | 0 | 0 | 2 | 0 | 0 | 0 | 2 | 1 | 1 |
| Ctsm      | 0 | 0 | 0 | 0 | 2 | 0 | 0 | 0 | 2 | 1 | 1 |
| Cul3      | 0 | 0 | 0 | 0 | 1 | 0 | 1 | 0 | 2 | 1 | 1 |
| D430041D1 | 0 | 0 | 0 | 0 | 2 | 0 | 0 | 0 | 2 | 1 | 1 |
| Dsg1a     | 0 | 0 | 0 | 0 | 2 | 0 | 0 | 0 | 2 | 1 | 1 |
| Ect2      | 0 | 0 | 0 | 0 | 2 | 0 | 0 | 0 | 2 | 1 | 1 |
| Eppk1     | 0 | 0 | 0 | 0 | 2 | 0 | 0 | 0 | 2 | 1 | 1 |
| Exoc6     | 0 | 0 | 0 | 0 | 1 | 1 | 0 | 0 | 2 | 1 | 1 |
| Fam91a1   | 0 | 0 | 0 | 0 | 2 | 0 | 0 | 0 | 2 | 1 | 1 |
| Fancc     | 0 | 0 | 0 | 0 | 2 | 0 | 0 | 0 | 2 | 1 | 1 |
| Farp2     | 0 | 0 | 0 | 0 | 2 | 0 | 0 | 0 | 2 | 1 | 1 |
| Fn1       | 0 | 0 | 0 | 0 | 2 | 0 | 0 | 0 | 2 | 1 | 1 |
| Gm6367    | 0 | 0 | 0 | 0 | 2 | 0 | 0 | 0 | 2 | 1 | 1 |
| Haus6     | 0 | 0 | 0 | 0 | 1 | 1 | 0 | 0 | 2 | 1 | 1 |
| Hgd       | 0 | 0 | 0 | 0 | 2 | 0 | 0 | 0 | 2 | 1 | 1 |
| Hnrnpr    | 0 | 0 | 0 | 0 | 1 | 0 | 1 | 0 | 2 | 1 | 1 |
| Icos      | 0 | 0 | 0 | 0 | 2 | 0 | 0 | 0 | 2 | 1 | 1 |
| Jak1      | 0 | 0 | 0 | 0 | 2 | 0 | 0 | 0 | 2 | 1 | 1 |
| Kmt2d     | 0 | 0 | 0 | 0 | 2 | 0 | 0 | 0 | 2 | 1 | 1 |
| Lama2     | 0 | 0 | 0 | 0 | 2 | 0 | 0 | 0 | 2 | 1 | 1 |
| Lca5      | 0 | 0 | 0 | 0 | 2 | 0 | 0 | 0 | 2 | 1 | 1 |
| Lrp1b     | 0 | 0 | 0 | 0 | 2 | 0 | 0 | 0 | 2 | 1 | 1 |
| Mrap2     | 0 | 0 | 0 | 0 | 1 | 0 | 1 | 0 | 2 | 1 | 1 |
| Mthfd2l   | 0 | 0 | 0 | 0 | 2 | 0 | 0 | 0 | 2 | 1 | 1 |
| Mybl1     | 0 | 0 | 0 | 0 | 1 | 0 | 1 | 0 | 2 | 1 | 1 |
| Myh11     | 0 | 0 | 0 | 0 | 2 | 0 | 0 | 0 | 2 | 1 | 1 |
| Myo18b    | 0 | 0 | 0 | 0 | 2 | 0 | 0 | 0 | 2 | 1 | 1 |
| Mypn      | 0 | 0 | 0 | 0 | 2 | 0 | 0 | 0 | 2 | 1 | 1 |
| Nbeal1    | 0 | 0 | 0 | 0 | 2 | 0 | 0 | 0 | 2 | 1 | 1 |
| Nfat5     | 0 | 0 | 0 | 0 | 2 | 0 | 0 | 0 | 2 | 1 | 1 |
| Ninl      | 0 | 0 | 0 | 0 | 1 | 1 | 0 | 0 | 2 | 1 | 1 |
| Npr2      | 0 | 0 | 0 | 0 | 1 | 1 | 0 | 0 | 2 | 1 | 1 |

|           |   |   |   |   |   |   |   |   |   |   |   |
|-----------|---|---|---|---|---|---|---|---|---|---|---|
| Nsd3      | 0 | 0 | 0 | 0 | 1 | 1 | 0 | 0 | 2 | 1 | 1 |
| Numa1     | 0 | 0 | 0 | 0 | 1 | 0 | 1 | 0 | 2 | 1 | 1 |
| Nup210    | 0 | 0 | 0 | 0 | 2 | 0 | 0 | 0 | 2 | 1 | 1 |
| Nwd2      | 0 | 0 | 0 | 0 | 2 | 0 | 0 | 0 | 2 | 1 | 1 |
| Olfr301   | 0 | 0 | 0 | 0 | 2 | 0 | 0 | 0 | 2 | 1 | 1 |
| Olfr516   | 0 | 0 | 0 | 0 | 1 | 1 | 0 | 0 | 2 | 1 | 1 |
| Oxsm      | 0 | 0 | 0 | 0 | 2 | 0 | 0 | 0 | 2 | 1 | 1 |
| Pcdhb19   | 0 | 0 | 0 | 0 | 2 | 0 | 0 | 0 | 2 | 1 | 1 |
| Pcd6ip    | 0 | 0 | 0 | 0 | 2 | 0 | 0 | 0 | 2 | 1 | 1 |
| Phlpp2    | 0 | 0 | 0 | 0 | 2 | 0 | 0 | 0 | 2 | 1 | 1 |
| Phtf1     | 0 | 0 | 0 | 0 | 2 | 0 | 0 | 0 | 2 | 1 | 1 |
| Pi4kb     | 0 | 0 | 0 | 0 | 1 | 0 | 1 | 0 | 2 | 1 | 1 |
| Ppm1j     | 0 | 0 | 0 | 0 | 1 | 0 | 1 | 0 | 2 | 1 | 1 |
| Rai1      | 0 | 0 | 0 | 0 | 1 | 0 | 1 | 0 | 2 | 1 | 1 |
| Ralgapa1  | 0 | 0 | 0 | 0 | 1 | 0 | 1 | 0 | 2 | 1 | 1 |
| Rgl2      | 0 | 0 | 0 | 0 | 2 | 0 | 0 | 0 | 2 | 1 | 1 |
| Satb1     | 0 | 0 | 0 | 0 | 2 | 0 | 0 | 0 | 2 | 1 | 1 |
| Six4      | 0 | 0 | 0 | 0 | 2 | 0 | 0 | 0 | 2 | 1 | 1 |
| Ski       | 0 | 0 | 0 | 0 | 2 | 0 | 0 | 0 | 2 | 1 | 1 |
| Slc4a7    | 0 | 0 | 0 | 0 | 2 | 0 | 0 | 0 | 2 | 1 | 1 |
| Slit2     | 0 | 0 | 0 | 0 | 2 | 0 | 0 | 0 | 2 | 1 | 1 |
| Srebf1    | 0 | 0 | 0 | 0 | 2 | 0 | 0 | 0 | 2 | 1 | 1 |
| Srgap2    | 0 | 0 | 0 | 0 | 2 | 0 | 0 | 0 | 2 | 1 | 1 |
| Sun1      | 0 | 0 | 0 | 0 | 2 | 0 | 0 | 0 | 2 | 1 | 1 |
| Supt5     | 0 | 0 | 0 | 0 | 2 | 0 | 0 | 0 | 2 | 1 | 1 |
| Teddm2    | 0 | 0 | 0 | 0 | 1 | 1 | 0 | 0 | 2 | 1 | 1 |
| Tlr12     | 0 | 0 | 0 | 0 | 2 | 0 | 0 | 0 | 2 | 1 | 1 |
| Tmprss11a | 0 | 0 | 0 | 0 | 2 | 0 | 0 | 0 | 2 | 1 | 1 |
| Trpm6     | 0 | 0 | 0 | 0 | 2 | 0 | 0 | 0 | 2 | 1 | 1 |
| Unc80     | 0 | 0 | 0 | 0 | 2 | 0 | 0 | 0 | 2 | 1 | 1 |
| Vcan      | 0 | 0 | 0 | 0 | 2 | 0 | 0 | 0 | 2 | 1 | 1 |
| Vmn2r97   | 0 | 0 | 0 | 0 | 2 | 0 | 0 | 0 | 2 | 1 | 1 |
| Zcchc2    | 0 | 0 | 0 | 0 | 2 | 0 | 0 | 0 | 2 | 1 | 1 |

|           |   |   |   |   |   |   |   |   |   |   |   |
|-----------|---|---|---|---|---|---|---|---|---|---|---|
| Zfhx2     | 0 | 0 | 0 | 0 | 2 | 0 | 0 | 0 | 2 | 1 | 1 |
| Zfp518b   | 0 | 0 | 0 | 0 | 1 | 1 | 0 | 0 | 2 | 1 | 1 |
| Zfp551    | 0 | 0 | 0 | 0 | 2 | 0 | 0 | 0 | 2 | 1 | 1 |
| 06100090  | 0 | 0 | 0 | 0 | 1 | 0 | 0 | 0 | 1 | 1 | 1 |
| 0610040J0 | 0 | 0 | 0 | 0 | 1 | 0 | 0 | 0 | 1 | 1 | 1 |
| 1700021FC | 0 | 0 | 0 | 0 | 1 | 0 | 0 | 0 | 1 | 1 | 1 |
| 170002211 | 0 | 0 | 0 | 0 | 1 | 0 | 0 | 0 | 1 | 1 | 1 |
| 170002911 | 0 | 0 | 0 | 0 | 1 | 0 | 0 | 0 | 1 | 1 | 1 |
| 1700031FC | 0 | 0 | 0 | 0 | 1 | 0 | 0 | 0 | 1 | 1 | 1 |
| 1700037H0 | 0 | 0 | 0 | 0 | 1 | 0 | 0 | 0 | 1 | 1 | 1 |
| 1700109H0 | 0 | 0 | 0 | 0 | 1 | 0 | 0 | 0 | 1 | 1 | 1 |
| 2010300C0 | 0 | 0 | 0 | 0 | 1 | 0 | 0 | 0 | 1 | 1 | 1 |
| 2300003K0 | 0 | 0 | 0 | 0 | 1 | 0 | 0 | 0 | 1 | 1 | 1 |
| 2310003L0 | 0 | 0 | 0 | 0 | 1 | 0 | 0 | 0 | 1 | 1 | 1 |
| 2310035C2 | 0 | 0 | 0 | 0 | 0 | 0 | 1 | 0 | 1 | 1 | 1 |
| 2310057J1 | 0 | 0 | 0 | 0 | 1 | 0 | 0 | 0 | 1 | 1 | 1 |
| 2310079G0 | 0 | 0 | 0 | 0 | 1 | 0 | 0 | 0 | 1 | 1 | 1 |
| 2610507B1 | 0 | 0 | 0 | 0 | 1 | 0 | 0 | 0 | 1 | 1 | 1 |
| 2810403A0 | 0 | 0 | 0 | 0 | 1 | 0 | 0 | 0 | 1 | 1 | 1 |
| 2810408A0 | 0 | 0 | 0 | 0 | 1 | 0 | 0 | 0 | 1 | 1 | 1 |
| 3110001I2 | 0 | 0 | 0 | 0 | 1 | 0 | 0 | 0 | 1 | 1 | 1 |
| 3110062M  | 0 | 0 | 0 | 0 | 1 | 0 | 0 | 0 | 1 | 1 | 1 |
| 4833423E2 | 0 | 0 | 0 | 0 | 1 | 0 | 0 | 0 | 1 | 1 | 1 |
| 4921509C1 | 0 | 0 | 0 | 0 | 1 | 0 | 0 | 0 | 1 | 1 | 1 |
| 4930407I1 | 0 | 0 | 0 | 0 | 0 | 0 | 1 | 0 | 1 | 1 | 1 |
| 4930430A0 | 0 | 0 | 0 | 0 | 1 | 0 | 0 | 0 | 1 | 1 | 1 |
| 4930432M  | 0 | 0 | 0 | 0 | 0 | 1 | 0 | 0 | 1 | 1 | 1 |
| 4930438A0 | 0 | 0 | 0 | 0 | 1 | 0 | 0 | 0 | 1 | 1 | 1 |
| 4930447FC | 0 | 0 | 0 | 0 | 1 | 0 | 0 | 0 | 1 | 1 | 1 |
| 4930452B0 | 0 | 0 | 0 | 0 | 1 | 0 | 0 | 0 | 1 | 1 | 1 |
| 4930539E0 | 0 | 0 | 0 | 0 | 1 | 0 | 0 | 0 | 1 | 1 | 1 |
| 4930548H0 | 0 | 0 | 0 | 0 | 1 | 0 | 0 | 0 | 1 | 1 | 1 |
| 4930553J1 | 0 | 0 | 0 | 0 | 1 | 0 | 0 | 0 | 1 | 1 | 1 |

|           |   |   |   |   |   |   |   |   |   |   |   |
|-----------|---|---|---|---|---|---|---|---|---|---|---|
| 4930595D: | 0 | 0 | 0 | 0 | 0 | 0 | 1 | 0 | 1 | 1 | 1 |
| 4932438A: | 0 | 0 | 0 | 0 | 1 | 0 | 0 | 0 | 1 | 1 | 1 |
| 4933402N0 | 0 | 0 | 0 | 0 | 1 | 0 | 0 | 0 | 1 | 1 | 1 |
| 4933405L1 | 0 | 0 | 0 | 0 | 1 | 0 | 0 | 0 | 1 | 1 | 1 |
| 5031439G0 | 0 | 0 | 0 | 0 | 1 | 0 | 0 | 0 | 1 | 1 | 1 |
| 5430403G: | 0 | 0 | 0 | 0 | 1 | 0 | 0 | 0 | 1 | 1 | 1 |
| 6430573F1 | 0 | 0 | 0 | 0 | 0 | 0 | 1 | 0 | 1 | 1 | 1 |
| 9130023H: | 0 | 0 | 0 | 0 | 1 | 0 | 0 | 0 | 1 | 1 | 1 |
| 9330159F1 | 0 | 0 | 0 | 0 | 1 | 0 | 0 | 0 | 1 | 1 | 1 |
| A2ml1     | 0 | 0 | 0 | 0 | 0 | 0 | 1 | 0 | 1 | 1 | 1 |
| A4gnt     | 0 | 0 | 0 | 0 | 1 | 0 | 0 | 0 | 1 | 1 | 1 |
| A730049H0 | 0 | 0 | 0 | 0 | 1 | 0 | 0 | 0 | 1 | 1 | 1 |
| AA792892  | 0 | 0 | 0 | 0 | 1 | 0 | 0 | 0 | 1 | 1 | 1 |
| AC132392. | 0 | 0 | 0 | 0 | 1 | 0 | 0 | 0 | 1 | 1 | 1 |
| AI837181  | 0 | 0 | 0 | 0 | 1 | 0 | 0 | 0 | 1 | 1 | 1 |
| AU018091  | 0 | 0 | 0 | 0 | 1 | 0 | 0 | 0 | 1 | 1 | 1 |
| AW551984  | 0 | 0 | 0 | 0 | 1 | 0 | 0 | 0 | 1 | 1 | 1 |
| AW554918  | 0 | 0 | 0 | 0 | 1 | 0 | 0 | 0 | 1 | 1 | 1 |
| AW822073  | 0 | 0 | 0 | 0 | 1 | 0 | 0 | 0 | 1 | 1 | 1 |
| Aamdc     | 0 | 0 | 0 | 0 | 1 | 0 | 0 | 0 | 1 | 1 | 1 |
| Abca14    | 0 | 0 | 0 | 0 | 1 | 0 | 0 | 0 | 1 | 1 | 1 |
| Abca16    | 0 | 0 | 0 | 0 | 1 | 0 | 0 | 0 | 1 | 1 | 1 |
| Abca17    | 0 | 0 | 0 | 0 | 1 | 0 | 0 | 0 | 1 | 1 | 1 |
| Abca6     | 0 | 0 | 0 | 0 | 1 | 0 | 0 | 0 | 1 | 1 | 1 |
| Abca8b    | 0 | 0 | 0 | 0 | 1 | 0 | 0 | 0 | 1 | 1 | 1 |
| Abca9     | 0 | 0 | 0 | 0 | 1 | 0 | 0 | 0 | 1 | 1 | 1 |
| Abcb11    | 0 | 0 | 0 | 0 | 1 | 0 | 0 | 0 | 1 | 1 | 1 |
| Abcb1b    | 0 | 0 | 0 | 0 | 1 | 0 | 0 | 0 | 1 | 1 | 1 |
| Abcb7     | 0 | 0 | 0 | 0 | 1 | 0 | 0 | 0 | 1 | 1 | 1 |
| Abcc3     | 0 | 0 | 0 | 0 | 1 | 0 | 0 | 0 | 1 | 1 | 1 |
| Abcc6     | 0 | 0 | 0 | 0 | 1 | 0 | 0 | 0 | 1 | 1 | 1 |
| Abcd2     | 0 | 0 | 0 | 0 | 1 | 0 | 0 | 0 | 1 | 1 | 1 |
| Abcd3     | 0 | 0 | 0 | 0 | 0 | 0 | 1 | 0 | 1 | 1 | 1 |



|        |   |   |   |   |   |   |   |   |   |   |   |
|--------|---|---|---|---|---|---|---|---|---|---|---|
| Abcg2  | 0 | 0 | 0 | 0 | 1 | 0 | 0 | 0 | 1 | 1 | 1 |
| Abhd13 | 0 | 0 | 0 | 0 | 1 | 0 | 0 | 0 | 1 | 1 | 1 |
| Abhd6  | 0 | 0 | 0 | 0 | 1 | 0 | 0 | 0 | 1 | 1 | 1 |
| Abi1   | 0 | 0 | 0 | 0 | 1 | 0 | 0 | 0 | 1 | 1 | 1 |
| Abi3bp | 0 | 0 | 0 | 0 | 1 | 0 | 0 | 0 | 1 | 1 | 1 |
| Abl2   | 0 | 0 | 0 | 0 | 1 | 0 | 0 | 0 | 1 | 1 | 1 |
| Ablim1 | 0 | 0 | 0 | 0 | 1 | 0 | 0 | 0 | 1 | 1 | 1 |
| Ablim2 | 0 | 0 | 0 | 0 | 1 | 0 | 0 | 0 | 1 | 1 | 1 |
| Abtb2  | 0 | 0 | 0 | 0 | 1 | 0 | 0 | 0 | 1 | 1 | 1 |
| Acad12 | 0 | 0 | 0 | 0 | 1 | 0 | 0 | 0 | 1 | 1 | 1 |
| Acad9  | 0 | 0 | 0 | 0 | 0 | 0 | 1 | 0 | 1 | 1 | 1 |
| Acadsb | 0 | 0 | 0 | 0 | 1 | 0 | 0 | 0 | 1 | 1 | 1 |
| Acap3  | 0 | 0 | 0 | 0 | 1 | 0 | 0 | 0 | 1 | 1 | 1 |
| Acat3  | 0 | 0 | 0 | 0 | 1 | 0 | 0 | 0 | 1 | 1 | 1 |
| Acbd3  | 0 | 0 | 0 | 0 | 1 | 0 | 0 | 0 | 1 | 1 | 1 |
| Acbd5  | 0 | 0 | 0 | 0 | 1 | 0 | 0 | 0 | 1 | 1 | 1 |
| Acbd6  | 0 | 0 | 0 | 0 | 1 | 0 | 0 | 0 | 1 | 1 | 1 |
| Acer2  | 0 | 0 | 0 | 0 | 1 | 0 | 0 | 0 | 1 | 1 | 1 |
| Acnat1 | 0 | 0 | 0 | 0 | 1 | 0 | 0 | 0 | 1 | 1 | 1 |
| Aco1   | 0 | 0 | 0 | 0 | 1 | 0 | 0 | 0 | 1 | 1 | 1 |
| Acod1  | 0 | 0 | 0 | 0 | 1 | 0 | 0 | 0 | 1 | 1 | 1 |
| Acot10 | 0 | 0 | 0 | 0 | 1 | 0 | 0 | 0 | 1 | 1 | 1 |
| Acot11 | 0 | 0 | 0 | 0 | 1 | 0 | 0 | 0 | 1 | 1 | 1 |
| Acot2  | 0 | 0 | 0 | 0 | 1 | 0 | 0 | 0 | 1 | 1 | 1 |
| Acp1   | 0 | 0 | 0 | 0 | 1 | 0 | 0 | 0 | 1 | 1 | 1 |
| Acsbg1 | 0 | 0 | 0 | 0 | 1 | 0 | 0 | 0 | 1 | 1 | 1 |
| Acsl4  | 0 | 0 | 0 | 0 | 1 | 0 | 0 | 0 | 1 | 1 | 1 |
| Acsm4  | 0 | 0 | 0 | 0 | 1 | 0 | 0 | 0 | 1 | 1 | 1 |
| Acss2  | 0 | 0 | 0 | 0 | 1 | 0 | 0 | 0 | 1 | 1 | 1 |
| Acta2  | 0 | 0 | 0 | 0 | 1 | 0 | 0 | 0 | 1 | 1 | 1 |
| Actl11 | 0 | 0 | 0 | 0 | 1 | 0 | 0 | 0 | 1 | 1 | 1 |
| Actl6b | 0 | 0 | 0 | 0 | 1 | 0 | 0 | 0 | 1 | 1 | 1 |
| Actl9  | 0 | 0 | 0 | 0 | 1 | 0 | 0 | 0 | 1 | 1 | 1 |

|          |   |   |   |   |   |   |   |   |   |   |   |
|----------|---|---|---|---|---|---|---|---|---|---|---|
| Actn1    | 0 | 0 | 0 | 0 | 1 | 0 | 0 | 0 | 1 | 1 | 1 |
| Actrt2   | 0 | 0 | 0 | 0 | 1 | 0 | 0 | 0 | 1 | 1 | 1 |
| Adad1    | 0 | 0 | 0 | 0 | 1 | 0 | 0 | 0 | 1 | 1 | 1 |
| Adam15   | 0 | 0 | 0 | 0 | 0 | 1 | 0 | 0 | 1 | 1 | 1 |
| Adam20   | 0 | 0 | 0 | 0 | 1 | 0 | 0 | 0 | 1 | 1 | 1 |
| Adam25   | 0 | 0 | 0 | 0 | 1 | 0 | 0 | 0 | 1 | 1 | 1 |
| Adam3    | 0 | 0 | 0 | 0 | 1 | 0 | 0 | 0 | 1 | 1 | 1 |
| Adam5    | 0 | 0 | 0 | 0 | 1 | 0 | 0 | 0 | 1 | 1 | 1 |
| Adam6a   | 0 | 0 | 0 | 0 | 1 | 0 | 0 | 0 | 1 | 1 | 1 |
| Adam9    | 0 | 0 | 0 | 0 | 1 | 0 | 0 | 0 | 1 | 1 | 1 |
| Adamdec1 | 0 | 0 | 0 | 0 | 1 | 0 | 0 | 0 | 1 | 1 | 1 |
| Adamts14 | 0 | 0 | 0 | 0 | 1 | 0 | 0 | 0 | 1 | 1 | 1 |
| Adamts15 | 0 | 0 | 0 | 0 | 1 | 0 | 0 | 0 | 1 | 1 | 1 |
| Adamts18 | 0 | 0 | 0 | 0 | 1 | 0 | 0 | 0 | 1 | 1 | 1 |
| Adamts2  | 0 | 0 | 0 | 0 | 1 | 0 | 0 | 0 | 1 | 1 | 1 |
| Adamtsl3 | 0 | 0 | 0 | 0 | 1 | 0 | 0 | 0 | 1 | 1 | 1 |
| Adcy7    | 0 | 0 | 0 | 0 | 1 | 0 | 0 | 0 | 1 | 1 | 1 |
| Add1     | 0 | 0 | 0 | 0 | 1 | 0 | 0 | 0 | 1 | 1 | 1 |
| Add3     | 0 | 0 | 0 | 0 | 1 | 0 | 0 | 0 | 1 | 1 | 1 |
| Adgra3   | 0 | 0 | 0 | 0 | 1 | 0 | 0 | 0 | 1 | 1 | 1 |
| Adgrb1   | 0 | 0 | 0 | 0 | 1 | 0 | 0 | 0 | 1 | 1 | 1 |
| Adgrb2   | 0 | 0 | 0 | 0 | 1 | 0 | 0 | 0 | 1 | 1 | 1 |
| Adgrf5   | 0 | 0 | 0 | 0 | 1 | 0 | 0 | 0 | 1 | 1 | 1 |
| Adgrg3   | 0 | 0 | 0 | 0 | 1 | 0 | 0 | 0 | 1 | 1 | 1 |
| Adgrg7   | 0 | 0 | 0 | 0 | 1 | 0 | 0 | 0 | 1 | 1 | 1 |
| Adgrl3   | 0 | 0 | 0 | 0 | 1 | 0 | 0 | 0 | 1 | 1 | 1 |
| Adprm    | 0 | 0 | 0 | 0 | 1 | 0 | 0 | 0 | 1 | 1 | 1 |
| Adsl     | 0 | 0 | 0 | 0 | 0 | 0 | 1 | 0 | 1 | 1 | 1 |
| Afap1l1  | 0 | 0 | 0 | 0 | 0 | 0 | 1 | 0 | 1 | 1 | 1 |
| Afap1l2  | 0 | 0 | 0 | 0 | 1 | 0 | 0 | 0 | 1 | 1 | 1 |
| Afdn     | 0 | 0 | 0 | 0 | 1 | 0 | 0 | 0 | 1 | 1 | 1 |
| Aga      | 0 | 0 | 0 | 0 | 1 | 0 | 0 | 0 | 1 | 1 | 1 |
| Agmat    | 0 | 0 | 0 | 0 | 1 | 0 | 0 | 0 | 1 | 1 | 1 |

|         |   |   |   |   |   |   |   |   |   |   |   |
|---------|---|---|---|---|---|---|---|---|---|---|---|
| Ago2    | 0 | 0 | 0 | 0 | 1 | 0 | 0 | 0 | 1 | 1 | 1 |
| Ago4    | 0 | 0 | 0 | 0 | 1 | 0 | 0 | 0 | 1 | 1 | 1 |
| Agtr1a  | 0 | 0 | 0 | 0 | 1 | 0 | 0 | 0 | 1 | 1 | 1 |
| Agxt    | 0 | 0 | 0 | 0 | 1 | 0 | 0 | 0 | 1 | 1 | 1 |
| Ahctf1  | 0 | 0 | 0 | 0 | 1 | 0 | 0 | 0 | 1 | 1 | 1 |
| Ahsa2   | 0 | 0 | 0 | 0 | 1 | 0 | 0 | 0 | 1 | 1 | 1 |
| Ahsg    | 0 | 0 | 0 | 0 | 0 | 1 | 0 | 0 | 1 | 1 | 1 |
| Aim2    | 0 | 0 | 0 | 0 | 1 | 0 | 0 | 0 | 1 | 1 | 1 |
| Aire    | 0 | 0 | 0 | 0 | 1 | 0 | 0 | 0 | 1 | 1 | 1 |
| Ak1     | 0 | 0 | 0 | 0 | 0 | 0 | 1 | 0 | 1 | 1 | 1 |
| Akap10  | 0 | 0 | 0 | 0 | 1 | 0 | 0 | 0 | 1 | 1 | 1 |
| Akap12  | 0 | 0 | 0 | 0 | 1 | 0 | 0 | 0 | 1 | 1 | 1 |
| Akap13  | 0 | 0 | 0 | 0 | 1 | 0 | 0 | 0 | 1 | 1 | 1 |
| Akna    | 0 | 0 | 0 | 0 | 1 | 0 | 0 | 0 | 1 | 1 | 1 |
| Akr1b3  | 0 | 0 | 0 | 0 | 1 | 0 | 0 | 0 | 1 | 1 | 1 |
| Akr1c12 | 0 | 0 | 0 | 0 | 1 | 0 | 0 | 0 | 1 | 1 | 1 |
| Akr1c13 | 0 | 0 | 0 | 0 | 1 | 0 | 0 | 0 | 1 | 1 | 1 |
| Akr1cl  | 0 | 0 | 0 | 0 | 0 | 0 | 1 | 0 | 1 | 1 | 1 |
| Alas1   | 0 | 0 | 0 | 0 | 1 | 0 | 0 | 0 | 1 | 1 | 1 |
| Alas2   | 0 | 0 | 0 | 0 | 1 | 0 | 0 | 0 | 1 | 1 | 1 |
| Alb     | 0 | 0 | 0 | 0 | 1 | 0 | 0 | 0 | 1 | 1 | 1 |
| Aldh5a1 | 0 | 0 | 0 | 0 | 1 | 0 | 0 | 0 | 1 | 1 | 1 |
| Alg1    | 0 | 0 | 0 | 0 | 1 | 0 | 0 | 0 | 1 | 1 | 1 |
| Alg11   | 0 | 0 | 0 | 0 | 1 | 0 | 0 | 0 | 1 | 1 | 1 |
| Alg13   | 0 | 0 | 0 | 0 | 1 | 0 | 0 | 0 | 1 | 1 | 1 |
| Alkbh5  | 0 | 0 | 0 | 0 | 1 | 0 | 0 | 0 | 1 | 1 | 1 |
| Alkbh6  | 0 | 0 | 0 | 0 | 1 | 0 | 0 | 0 | 1 | 1 | 1 |
| Alox12  | 0 | 0 | 0 | 0 | 1 | 0 | 0 | 0 | 1 | 1 | 1 |
| Alox15  | 0 | 0 | 0 | 0 | 1 | 0 | 0 | 0 | 1 | 1 | 1 |
| Alox5   | 0 | 0 | 0 | 0 | 1 | 0 | 0 | 0 | 1 | 1 | 1 |
| Alpk2   | 0 | 0 | 0 | 0 | 1 | 0 | 0 | 0 | 1 | 1 | 1 |
| Als2    | 0 | 0 | 0 | 0 | 1 | 0 | 0 | 0 | 1 | 1 | 1 |
| Ambn    | 0 | 0 | 0 | 0 | 1 | 0 | 0 | 0 | 1 | 1 | 1 |

|          |   |   |   |   |   |   |   |   |   |   |   |
|----------|---|---|---|---|---|---|---|---|---|---|---|
| Ambra1   | 0 | 0 | 0 | 0 | 1 | 0 | 0 | 0 | 1 | 1 | 1 |
| Amd1     | 0 | 0 | 0 | 0 | 1 | 0 | 0 | 0 | 1 | 1 | 1 |
| Amer1    | 0 | 0 | 0 | 0 | 1 | 0 | 0 | 0 | 1 | 1 | 1 |
| Amer2    | 0 | 0 | 0 | 0 | 1 | 0 | 0 | 0 | 1 | 1 | 1 |
| Amfr     | 0 | 0 | 0 | 0 | 1 | 0 | 0 | 0 | 1 | 1 | 1 |
| Amph     | 0 | 0 | 0 | 0 | 1 | 0 | 0 | 0 | 1 | 1 | 1 |
| Anapc15  | 0 | 0 | 0 | 0 | 1 | 0 | 0 | 0 | 1 | 1 | 1 |
| Anapc2   | 0 | 0 | 0 | 0 | 1 | 0 | 0 | 0 | 1 | 1 | 1 |
| Ang6     | 0 | 0 | 0 | 0 | 1 | 0 | 0 | 0 | 1 | 1 | 1 |
| Angel1   | 0 | 0 | 0 | 0 | 1 | 0 | 0 | 0 | 1 | 1 | 1 |
| Ank2     | 0 | 0 | 0 | 0 | 1 | 0 | 0 | 0 | 1 | 1 | 1 |
| Ank3     | 0 | 0 | 0 | 0 | 1 | 0 | 0 | 0 | 1 | 1 | 1 |
| Ankrd13c | 0 | 0 | 0 | 0 | 1 | 0 | 0 | 0 | 1 | 1 | 1 |
| Ankrd17  | 0 | 0 | 0 | 0 | 1 | 0 | 0 | 0 | 1 | 1 | 1 |
| Ankrd33b | 0 | 0 | 0 | 0 | 1 | 0 | 0 | 0 | 1 | 1 | 1 |
| Ankrd42  | 0 | 0 | 0 | 0 | 1 | 0 | 0 | 0 | 1 | 1 | 1 |
| Ankrd49  | 0 | 0 | 0 | 0 | 1 | 0 | 0 | 0 | 1 | 1 | 1 |
| Ankub1   | 0 | 0 | 0 | 0 | 1 | 0 | 0 | 0 | 1 | 1 | 1 |
| Anln     | 0 | 0 | 0 | 0 | 1 | 0 | 0 | 0 | 1 | 1 | 1 |
| Ano1     | 0 | 0 | 0 | 0 | 1 | 0 | 0 | 0 | 1 | 1 | 1 |
| Ano6     | 0 | 0 | 0 | 0 | 0 | 0 | 1 | 0 | 1 | 1 | 1 |
| Ano7     | 0 | 0 | 0 | 0 | 0 | 1 | 0 | 0 | 1 | 1 | 1 |
| Aoah     | 0 | 0 | 0 | 0 | 1 | 0 | 0 | 0 | 1 | 1 | 1 |
| Aox2     | 0 | 0 | 0 | 0 | 1 | 0 | 0 | 0 | 1 | 1 | 1 |
| Aox4     | 0 | 0 | 0 | 0 | 1 | 0 | 0 | 0 | 1 | 1 | 1 |
| Ap1ar    | 0 | 0 | 0 | 0 | 1 | 0 | 0 | 0 | 1 | 1 | 1 |
| Ap1b1    | 0 | 0 | 0 | 0 | 1 | 0 | 0 | 0 | 1 | 1 | 1 |
| Ap2b1    | 0 | 0 | 0 | 0 | 1 | 0 | 0 | 0 | 1 | 1 | 1 |
| Ap3b2    | 0 | 0 | 0 | 0 | 1 | 0 | 0 | 0 | 1 | 1 | 1 |
| Ap3d1    | 0 | 0 | 0 | 0 | 1 | 0 | 0 | 0 | 1 | 1 | 1 |
| Apba1    | 0 | 0 | 0 | 0 | 1 | 0 | 0 | 0 | 1 | 1 | 1 |
| Apobec1  | 0 | 0 | 0 | 0 | 1 | 0 | 0 | 0 | 1 | 1 | 1 |
| Apol11b  | 0 | 0 | 0 | 0 | 1 | 0 | 0 | 0 | 1 | 1 | 1 |

|          |   |   |   |   |   |   |   |   |   |   |   |
|----------|---|---|---|---|---|---|---|---|---|---|---|
| Apol6    | 0 | 1 | 0 | 0 | 0 | 0 | 0 | 0 | 1 | 1 | 1 |
| Appbp2   | 0 | 0 | 0 | 0 | 1 | 0 | 0 | 0 | 1 | 1 | 1 |
| Aqp8     | 0 | 0 | 0 | 0 | 1 | 0 | 0 | 0 | 1 | 1 | 1 |
| Araf     | 0 | 0 | 0 | 0 | 1 | 0 | 0 | 0 | 1 | 1 | 1 |
| Arap2    | 0 | 0 | 0 | 0 | 1 | 0 | 0 | 0 | 1 | 1 | 1 |
| Arap3    | 0 | 0 | 0 | 0 | 1 | 0 | 0 | 0 | 1 | 1 | 1 |
| Arf5     | 0 | 0 | 0 | 0 | 1 | 0 | 0 | 0 | 1 | 1 | 1 |
| Arhgap17 | 0 | 0 | 0 | 0 | 1 | 0 | 0 | 0 | 1 | 1 | 1 |
| Arhgap28 | 0 | 0 | 0 | 0 | 1 | 0 | 0 | 0 | 1 | 1 | 1 |
| Arhgap30 | 0 | 0 | 0 | 0 | 1 | 0 | 0 | 0 | 1 | 1 | 1 |
| Arhgap33 | 0 | 0 | 0 | 0 | 0 | 1 | 0 | 0 | 1 | 1 | 1 |
| Arhgap39 | 0 | 0 | 0 | 0 | 1 | 0 | 0 | 0 | 1 | 1 | 1 |
| Arhgap40 | 0 | 0 | 0 | 0 | 1 | 0 | 0 | 0 | 1 | 1 | 1 |
| Arhgdib  | 0 | 0 | 0 | 0 | 1 | 0 | 0 | 0 | 1 | 1 | 1 |
| Arhgef12 | 0 | 0 | 0 | 0 | 1 | 0 | 0 | 0 | 1 | 1 | 1 |
| Arhgef15 | 0 | 0 | 0 | 0 | 1 | 0 | 0 | 0 | 1 | 1 | 1 |
| Arhgef25 | 0 | 0 | 0 | 0 | 1 | 0 | 0 | 0 | 1 | 1 | 1 |
| Arhgef6  | 0 | 0 | 0 | 0 | 1 | 0 | 0 | 0 | 1 | 1 | 1 |
| Arid4a   | 0 | 0 | 0 | 0 | 1 | 0 | 0 | 0 | 1 | 1 | 1 |
| Armc4    | 0 | 0 | 0 | 0 | 1 | 0 | 0 | 0 | 1 | 1 | 1 |
| Armc8    | 0 | 0 | 0 | 0 | 1 | 0 | 0 | 0 | 1 | 1 | 1 |
| Armcx1   | 0 | 0 | 0 | 0 | 1 | 0 | 0 | 0 | 1 | 1 | 1 |
| Asap2    | 0 | 0 | 0 | 0 | 1 | 0 | 0 | 0 | 1 | 1 | 1 |
| Asap3    | 0 | 0 | 0 | 0 | 1 | 0 | 0 | 0 | 1 | 1 | 1 |
| Asb12    | 0 | 0 | 0 | 0 | 1 | 0 | 0 | 0 | 1 | 1 | 1 |
| Asb14    | 0 | 0 | 0 | 0 | 1 | 0 | 0 | 0 | 1 | 1 | 1 |
| Asb15    | 0 | 0 | 0 | 0 | 1 | 0 | 0 | 0 | 1 | 1 | 1 |
| Asb3     | 0 | 0 | 0 | 0 | 1 | 0 | 0 | 0 | 1 | 1 | 1 |
| Ascc3    | 0 | 0 | 0 | 0 | 1 | 0 | 0 | 0 | 1 | 1 | 1 |
| Asic3    | 0 | 0 | 0 | 0 | 1 | 0 | 0 | 0 | 1 | 1 | 1 |
| Aspm     | 0 | 0 | 0 | 0 | 1 | 0 | 0 | 0 | 1 | 1 | 1 |
| Aste1    | 0 | 0 | 0 | 0 | 1 | 0 | 0 | 0 | 1 | 1 | 1 |
| Astn1    | 0 | 0 | 0 | 0 | 1 | 0 | 0 | 0 | 1 | 1 | 1 |

|          |   |   |   |   |   |   |   |   |   |   |   |
|----------|---|---|---|---|---|---|---|---|---|---|---|
| Astn2    | 0 | 0 | 0 | 0 | 1 | 0 | 0 | 0 | 1 | 1 | 1 |
| Asxl1    | 0 | 0 | 0 | 0 | 1 | 0 | 0 | 0 | 1 | 1 | 1 |
| Atf1     | 0 | 0 | 0 | 0 | 1 | 0 | 0 | 0 | 1 | 1 | 1 |
| Atf2     | 0 | 0 | 0 | 0 | 1 | 0 | 0 | 0 | 1 | 1 | 1 |
| Atf4     | 0 | 0 | 0 | 0 | 1 | 0 | 0 | 0 | 1 | 1 | 1 |
| Atf5     | 0 | 0 | 0 | 0 | 1 | 0 | 0 | 0 | 1 | 1 | 1 |
| Atg13    | 0 | 0 | 0 | 0 | 1 | 0 | 0 | 0 | 1 | 1 | 1 |
| Atg2b    | 0 | 0 | 0 | 0 | 1 | 0 | 0 | 0 | 1 | 1 | 1 |
| Atg9a    | 0 | 0 | 0 | 0 | 1 | 0 | 0 | 0 | 1 | 1 | 1 |
| Atp10b   | 0 | 0 | 0 | 0 | 0 | 0 | 1 | 0 | 1 | 1 | 1 |
| Atp10d   | 0 | 0 | 0 | 0 | 1 | 0 | 0 | 0 | 1 | 1 | 1 |
| Atp12a   | 0 | 0 | 0 | 0 | 1 | 0 | 0 | 0 | 1 | 1 | 1 |
| Atp13a4  | 0 | 0 | 0 | 0 | 1 | 0 | 0 | 0 | 1 | 1 | 1 |
| Atp13a5  | 0 | 0 | 0 | 0 | 1 | 0 | 0 | 0 | 1 | 1 | 1 |
| Atp5b    | 0 | 0 | 0 | 0 | 1 | 0 | 0 | 0 | 1 | 1 | 1 |
| Atp6v0a2 | 0 | 0 | 0 | 0 | 1 | 0 | 0 | 0 | 1 | 1 | 1 |
| Atp6v0d1 | 0 | 0 | 0 | 0 | 1 | 0 | 0 | 0 | 1 | 1 | 1 |
| Atp7a    | 0 | 0 | 0 | 0 | 1 | 0 | 0 | 0 | 1 | 1 | 1 |
| Atpif1   | 0 | 0 | 0 | 0 | 0 | 1 | 0 | 0 | 1 | 1 | 1 |
| Atrip    | 0 | 0 | 0 | 0 | 1 | 0 | 0 | 0 | 1 | 1 | 1 |
| Atrnl1   | 0 | 0 | 0 | 0 | 1 | 0 | 0 | 0 | 1 | 1 | 1 |
| Atxn10   | 0 | 0 | 0 | 0 | 1 | 0 | 0 | 0 | 1 | 1 | 1 |
| Atxn7l3  | 0 | 0 | 0 | 0 | 1 | 0 | 0 | 0 | 1 | 1 | 1 |
| Axdnd1   | 0 | 0 | 0 | 0 | 0 | 0 | 1 | 0 | 1 | 1 | 1 |
| B230118H | 0 | 0 | 0 | 0 | 1 | 0 | 0 | 0 | 1 | 1 | 1 |
| B230219D | 0 | 0 | 0 | 0 | 1 | 0 | 0 | 0 | 1 | 1 | 1 |
| B3galnt2 | 0 | 0 | 0 | 0 | 1 | 0 | 0 | 0 | 1 | 1 | 1 |
| B3galt1  | 0 | 0 | 0 | 0 | 1 | 0 | 0 | 0 | 1 | 1 | 1 |
| B3galt6  | 0 | 0 | 0 | 0 | 1 | 0 | 0 | 0 | 1 | 1 | 1 |
| B3gat3   | 0 | 0 | 0 | 0 | 1 | 0 | 0 | 0 | 1 | 1 | 1 |
| B3gnt3   | 0 | 0 | 0 | 0 | 1 | 0 | 0 | 0 | 1 | 1 | 1 |
| B3gnt7   | 0 | 0 | 0 | 0 | 1 | 0 | 0 | 0 | 1 | 1 | 1 |
| B4galnt4 | 0 | 0 | 0 | 0 | 0 | 0 | 1 | 0 | 1 | 1 | 1 |

|          |   |   |   |   |   |   |   |   |   |   |   |
|----------|---|---|---|---|---|---|---|---|---|---|---|
| B4galt4  | 0 | 0 | 0 | 0 | 1 | 0 | 0 | 0 | 1 | 1 | 1 |
| BC005561 | 0 | 0 | 0 | 0 | 1 | 0 | 0 | 0 | 1 | 1 | 1 |
| BC027072 | 0 | 0 | 0 | 0 | 0 | 1 | 0 | 0 | 1 | 1 | 1 |
| BC030500 | 0 | 0 | 0 | 0 | 1 | 0 | 0 | 0 | 1 | 1 | 1 |
| BC037034 | 0 | 0 | 0 | 0 | 1 | 0 | 0 | 0 | 1 | 1 | 1 |
| BC048562 | 0 | 0 | 0 | 0 | 1 | 0 | 0 | 0 | 1 | 1 | 1 |
| BC049715 | 0 | 0 | 0 | 0 | 1 | 0 | 0 | 0 | 1 | 1 | 1 |
| BC055324 | 0 | 0 | 0 | 0 | 1 | 0 | 0 | 0 | 1 | 1 | 1 |
| Baat     | 0 | 0 | 0 | 0 | 1 | 0 | 0 | 0 | 1 | 1 | 1 |
| Bag4     | 0 | 0 | 0 | 0 | 1 | 0 | 0 | 0 | 1 | 1 | 1 |
| Bambi    | 0 | 0 | 0 | 0 | 1 | 0 | 0 | 0 | 1 | 1 | 1 |
| Baz1a    | 0 | 0 | 0 | 0 | 1 | 0 | 0 | 0 | 1 | 1 | 1 |
| Bbof1    | 0 | 0 | 0 | 0 | 1 | 0 | 0 | 0 | 1 | 1 | 1 |
| Bbs12    | 0 | 0 | 0 | 0 | 1 | 0 | 0 | 0 | 1 | 1 | 1 |
| Bbs9     | 0 | 0 | 0 | 0 | 1 | 0 | 0 | 0 | 1 | 1 | 1 |
| Bbx      | 0 | 0 | 0 | 0 | 1 | 0 | 0 | 0 | 1 | 1 | 1 |
| Bcan     | 0 | 0 | 0 | 0 | 1 | 0 | 0 | 0 | 1 | 1 | 1 |
| Bcar1    | 0 | 0 | 0 | 0 | 1 | 0 | 0 | 0 | 1 | 1 | 1 |
| Bcar3    | 0 | 0 | 0 | 0 | 1 | 0 | 0 | 0 | 1 | 1 | 1 |
| Bcl2a1b  | 0 | 0 | 0 | 0 | 1 | 0 | 0 | 0 | 1 | 1 | 1 |
| Bcl2l1   | 0 | 0 | 0 | 0 | 1 | 0 | 0 | 0 | 1 | 1 | 1 |
| Bcl2l13  | 0 | 0 | 0 | 0 | 1 | 0 | 0 | 0 | 1 | 1 | 1 |
| Bcl9     | 0 | 0 | 0 | 0 | 1 | 0 | 0 | 0 | 1 | 1 | 1 |
| Bclaf1   | 0 | 0 | 0 | 0 | 1 | 0 | 0 | 0 | 1 | 1 | 1 |
| Bco2     | 0 | 0 | 0 | 0 | 1 | 0 | 0 | 0 | 1 | 1 | 1 |
| Bdp1     | 0 | 0 | 0 | 0 | 1 | 0 | 0 | 0 | 1 | 1 | 1 |
| Bicra    | 0 | 0 | 0 | 0 | 0 | 0 | 1 | 0 | 1 | 1 | 1 |
| Bid      | 0 | 0 | 0 | 0 | 1 | 0 | 0 | 0 | 1 | 1 | 1 |
| Bik      | 0 | 0 | 0 | 0 | 1 | 0 | 0 | 0 | 1 | 1 | 1 |
| Bin1     | 0 | 0 | 0 | 0 | 1 | 0 | 0 | 0 | 1 | 1 | 1 |
| Bin3     | 0 | 0 | 0 | 0 | 1 | 0 | 0 | 0 | 1 | 1 | 1 |
| Birc3    | 0 | 0 | 0 | 0 | 1 | 0 | 0 | 0 | 1 | 1 | 1 |
| Blmh     | 0 | 0 | 0 | 0 | 1 | 0 | 0 | 0 | 1 | 1 | 1 |

|           |   |   |   |   |   |   |   |   |   |   |   |
|-----------|---|---|---|---|---|---|---|---|---|---|---|
| Bmper     | 0 | 0 | 0 | 0 | 1 | 0 | 0 | 0 | 1 | 1 | 1 |
| Bmpr2     | 0 | 0 | 0 | 0 | 1 | 0 | 0 | 0 | 1 | 1 | 1 |
| Bmx       | 0 | 0 | 0 | 0 | 1 | 0 | 0 | 0 | 1 | 1 | 1 |
| Bnc2      | 0 | 0 | 0 | 0 | 0 | 1 | 0 | 0 | 1 | 1 | 1 |
| Bod1l     | 0 | 0 | 0 | 0 | 1 | 0 | 0 | 0 | 1 | 1 | 1 |
| Bpifb3    | 0 | 0 | 0 | 0 | 1 | 0 | 0 | 0 | 1 | 1 | 1 |
| Bpifb4    | 0 | 0 | 0 | 0 | 1 | 0 | 0 | 0 | 1 | 1 | 1 |
| Bpifb5    | 0 | 0 | 0 | 0 | 0 | 1 | 0 | 0 | 1 | 1 | 1 |
| Bpifb9a   | 0 | 0 | 0 | 0 | 1 | 0 | 0 | 0 | 1 | 1 | 1 |
| Bptf      | 0 | 0 | 0 | 0 | 1 | 0 | 0 | 0 | 1 | 1 | 1 |
| Brinp1    | 0 | 0 | 0 | 0 | 1 | 0 | 0 | 0 | 1 | 1 | 1 |
| Brinp2    | 0 | 0 | 0 | 0 | 1 | 0 | 0 | 0 | 1 | 1 | 1 |
| Brip1     | 0 | 0 | 0 | 0 | 1 | 0 | 0 | 0 | 1 | 1 | 1 |
| Brpf1     | 0 | 0 | 0 | 0 | 0 | 0 | 1 | 0 | 1 | 1 | 1 |
| Bscl2     | 0 | 0 | 0 | 0 | 0 | 0 | 1 | 0 | 1 | 1 | 1 |
| Btbd35f6  | 0 | 0 | 0 | 0 | 1 | 0 | 0 | 0 | 1 | 1 | 1 |
| Btbd7     | 0 | 0 | 0 | 0 | 1 | 0 | 0 | 0 | 1 | 1 | 1 |
| Btnl4     | 0 | 0 | 0 | 0 | 1 | 0 | 0 | 0 | 1 | 1 | 1 |
| Bud31     | 0 | 0 | 0 | 0 | 1 | 0 | 0 | 0 | 1 | 1 | 1 |
| Bzw2      | 0 | 0 | 0 | 0 | 1 | 0 | 0 | 0 | 1 | 1 | 1 |
| C130026l2 | 0 | 0 | 0 | 0 | 1 | 0 | 0 | 0 | 1 | 1 | 1 |
| C1qtnf2   | 0 | 0 | 0 | 0 | 1 | 0 | 0 | 0 | 1 | 1 | 1 |
| C1rb      | 0 | 0 | 0 | 0 | 1 | 0 | 0 | 0 | 1 | 1 | 1 |
| C2        | 0 | 0 | 0 | 0 | 1 | 0 | 0 | 0 | 1 | 1 | 1 |
| C2cd2l    | 0 | 0 | 0 | 0 | 1 | 0 | 0 | 0 | 1 | 1 | 1 |
| C2cd3     | 0 | 0 | 0 | 0 | 1 | 0 | 0 | 0 | 1 | 1 | 1 |
| C2cd4c    | 0 | 0 | 0 | 0 | 0 | 1 | 0 | 0 | 1 | 1 | 1 |
| C3        | 0 | 0 | 0 | 0 | 1 | 0 | 0 | 0 | 1 | 1 | 1 |
| C330027C  | 0 | 0 | 0 | 0 | 1 | 0 | 0 | 0 | 1 | 1 | 1 |
| C87977    | 0 | 0 | 0 | 0 | 1 | 0 | 0 | 0 | 1 | 1 | 1 |
| Cab39     | 0 | 0 | 0 | 0 | 0 | 1 | 0 | 0 | 1 | 1 | 1 |
| Cabin1    | 0 | 0 | 0 | 0 | 1 | 0 | 0 | 0 | 1 | 1 | 1 |
| Cacna1f   | 0 | 0 | 0 | 0 | 1 | 0 | 0 | 0 | 1 | 1 | 1 |



|          |   |   |   |   |   |   |   |   |   |   |   |
|----------|---|---|---|---|---|---|---|---|---|---|---|
| Cacna1h  | 0 | 0 | 0 | 0 | 1 | 0 | 0 | 0 | 1 | 1 | 1 |
| Cacna2d1 | 0 | 0 | 0 | 0 | 1 | 0 | 0 | 0 | 1 | 1 | 1 |
| Cacna2d3 | 0 | 0 | 0 | 0 | 1 | 0 | 0 | 0 | 1 | 1 | 1 |
| Cactin   | 0 | 0 | 0 | 0 | 0 | 1 | 0 | 0 | 1 | 1 | 1 |
| Cad      | 0 | 0 | 0 | 0 | 1 | 0 | 0 | 0 | 1 | 1 | 1 |
| Cadm4    | 0 | 0 | 0 | 0 | 1 | 0 | 0 | 0 | 1 | 1 | 1 |
| Cadps    | 0 | 0 | 0 | 0 | 1 | 0 | 0 | 0 | 1 | 1 | 1 |
| Cadps2   | 0 | 0 | 0 | 0 | 1 | 0 | 0 | 0 | 1 | 1 | 1 |
| Calm5    | 0 | 0 | 0 | 0 | 1 | 0 | 0 | 0 | 1 | 1 | 1 |
| Calml4   | 0 | 0 | 0 | 0 | 1 | 0 | 0 | 0 | 1 | 1 | 1 |
| Camkmt   | 0 | 0 | 0 | 0 | 1 | 0 | 0 | 0 | 1 | 1 | 1 |
| Camp     | 0 | 0 | 0 | 0 | 1 | 0 | 0 | 0 | 1 | 1 | 1 |
| Canx     | 0 | 0 | 0 | 0 | 1 | 0 | 0 | 0 | 1 | 1 | 1 |
| Capn2    | 0 | 0 | 0 | 0 | 0 | 0 | 1 | 0 | 1 | 1 | 1 |
| Capn7    | 0 | 0 | 1 | 0 | 0 | 0 | 0 | 0 | 1 | 1 | 1 |
| Caprin1  | 0 | 0 | 0 | 0 | 1 | 0 | 0 | 0 | 1 | 1 | 1 |
| Car14    | 0 | 0 | 0 | 0 | 1 | 0 | 0 | 0 | 1 | 1 | 1 |
| Car2     | 0 | 0 | 0 | 0 | 1 | 0 | 0 | 0 | 1 | 1 | 1 |
| Car5a    | 0 | 0 | 0 | 0 | 1 | 0 | 0 | 0 | 1 | 1 | 1 |
| Carmil3  | 0 | 0 | 0 | 0 | 0 | 0 | 1 | 0 | 1 | 1 | 1 |
| Cars     | 0 | 0 | 0 | 0 | 1 | 0 | 0 | 0 | 1 | 1 | 1 |
| Casc1    | 0 | 0 | 0 | 0 | 1 | 0 | 0 | 0 | 1 | 1 | 1 |
| Casc3    | 0 | 0 | 0 | 0 | 1 | 0 | 0 | 0 | 1 | 1 | 1 |
| Cask     | 0 | 0 | 0 | 0 | 1 | 0 | 0 | 0 | 1 | 1 | 1 |
| Caskin2  | 0 | 0 | 0 | 0 | 1 | 0 | 0 | 0 | 1 | 1 | 1 |
| Cast     | 0 | 0 | 0 | 0 | 0 | 0 | 1 | 0 | 1 | 1 | 1 |
| Cavin2   | 0 | 0 | 0 | 0 | 1 | 0 | 0 | 0 | 1 | 1 | 1 |
| Cblb     | 0 | 0 | 0 | 0 | 1 | 0 | 0 | 0 | 1 | 1 | 1 |
| Cblc     | 0 | 0 | 0 | 0 | 0 | 0 | 1 | 0 | 1 | 1 | 1 |
| Cbln4    | 0 | 0 | 0 | 0 | 1 | 0 | 0 | 0 | 1 | 1 | 1 |
| Cbx2     | 0 | 0 | 0 | 0 | 1 | 0 | 0 | 0 | 1 | 1 | 1 |
| Cc2d1a   | 0 | 0 | 0 | 0 | 1 | 0 | 0 | 0 | 1 | 1 | 1 |
| Ccdc110  | 0 | 0 | 0 | 0 | 1 | 0 | 0 | 0 | 1 | 1 | 1 |

|         |   |   |   |   |   |   |   |   |   |   |   |
|---------|---|---|---|---|---|---|---|---|---|---|---|
| Ccdc127 | 0 | 0 | 0 | 0 | 1 | 0 | 0 | 0 | 1 | 1 | 1 |
| Ccdc138 | 0 | 0 | 0 | 0 | 1 | 0 | 0 | 0 | 1 | 1 | 1 |
| Ccdc141 | 0 | 0 | 0 | 0 | 1 | 0 | 0 | 0 | 1 | 1 | 1 |
| Ccdc148 | 0 | 0 | 0 | 0 | 1 | 0 | 0 | 0 | 1 | 1 | 1 |
| Ccdc151 | 0 | 0 | 0 | 0 | 0 | 1 | 0 | 0 | 1 | 1 | 1 |
| Ccdc154 | 0 | 0 | 0 | 0 | 0 | 0 | 1 | 0 | 1 | 1 | 1 |
| Ccdc157 | 0 | 0 | 0 | 0 | 1 | 0 | 0 | 0 | 1 | 1 | 1 |
| Ccdc158 | 0 | 0 | 0 | 0 | 1 | 0 | 0 | 0 | 1 | 1 | 1 |
| Ccdc162 | 0 | 0 | 0 | 0 | 1 | 0 | 0 | 0 | 1 | 1 | 1 |
| Ccdc180 | 0 | 0 | 0 | 0 | 1 | 0 | 0 | 0 | 1 | 1 | 1 |
| Ccdc24  | 0 | 0 | 0 | 0 | 1 | 0 | 0 | 0 | 1 | 1 | 1 |
| Ccdc33  | 0 | 0 | 0 | 0 | 1 | 0 | 0 | 0 | 1 | 1 | 1 |
| Ccdc54  | 0 | 0 | 0 | 0 | 1 | 0 | 0 | 0 | 1 | 1 | 1 |
| Ccdc61  | 0 | 0 | 0 | 0 | 1 | 0 | 0 | 0 | 1 | 1 | 1 |
| Ccdc7a  | 0 | 0 | 0 | 0 | 1 | 0 | 0 | 0 | 1 | 1 | 1 |
| Ccdc7b  | 0 | 0 | 0 | 0 | 1 | 0 | 0 | 0 | 1 | 1 | 1 |
| Ccdc8   | 0 | 0 | 0 | 0 | 1 | 0 | 0 | 0 | 1 | 1 | 1 |
| Ccdc81  | 0 | 0 | 0 | 0 | 1 | 0 | 0 | 0 | 1 | 1 | 1 |
| Ccdc85c | 0 | 0 | 0 | 0 | 1 | 0 | 0 | 0 | 1 | 1 | 1 |
| Ccdc9   | 0 | 0 | 0 | 0 | 1 | 0 | 0 | 0 | 1 | 1 | 1 |
| Ccdc90b | 0 | 0 | 0 | 0 | 0 | 0 | 1 | 0 | 1 | 1 | 1 |
| Ccin    | 0 | 0 | 0 | 0 | 1 | 0 | 0 | 0 | 1 | 1 | 1 |
| Ccl24   | 0 | 0 | 0 | 0 | 1 | 0 | 0 | 0 | 1 | 1 | 1 |
| Ccnt2   | 0 | 0 | 0 | 0 | 0 | 1 | 0 | 0 | 1 | 1 | 1 |
| Ccr4    | 0 | 0 | 0 | 0 | 1 | 0 | 0 | 0 | 1 | 1 | 1 |
| Ccr9    | 0 | 0 | 0 | 0 | 1 | 0 | 0 | 0 | 1 | 1 | 1 |
| Cct2    | 0 | 0 | 0 | 0 | 1 | 0 | 0 | 0 | 1 | 1 | 1 |
| Cct6b   | 0 | 0 | 0 | 0 | 1 | 0 | 0 | 0 | 1 | 1 | 1 |
| Cd101   | 0 | 0 | 0 | 0 | 1 | 0 | 0 | 0 | 1 | 1 | 1 |
| Cd19    | 0 | 0 | 0 | 0 | 1 | 0 | 0 | 0 | 1 | 1 | 1 |
| Cd209g  | 0 | 0 | 0 | 0 | 1 | 0 | 0 | 0 | 1 | 1 | 1 |
| Cd300lg | 0 | 0 | 0 | 0 | 1 | 0 | 0 | 0 | 1 | 1 | 1 |
| Cd34    | 0 | 0 | 0 | 0 | 1 | 0 | 0 | 0 | 1 | 1 | 1 |

|          |   |   |   |   |   |   |   |   |   |   |   |
|----------|---|---|---|---|---|---|---|---|---|---|---|
| Cd44     | 0 | 0 | 0 | 0 | 1 | 0 | 0 | 0 | 1 | 1 | 1 |
| Cd84     | 0 | 0 | 0 | 0 | 1 | 0 | 0 | 0 | 1 | 1 | 1 |
| Cd9      | 0 | 0 | 0 | 0 | 0 | 1 | 0 | 0 | 1 | 1 | 1 |
| Cdan1    | 0 | 0 | 0 | 0 | 1 | 0 | 0 | 0 | 1 | 1 | 1 |
| Cdc20    | 0 | 0 | 0 | 0 | 1 | 0 | 0 | 0 | 1 | 1 | 1 |
| Cdc20b   | 0 | 0 | 0 | 0 | 1 | 0 | 0 | 0 | 1 | 1 | 1 |
| Cdc27    | 0 | 0 | 0 | 0 | 1 | 0 | 0 | 0 | 1 | 1 | 1 |
| Cdc37l1  | 0 | 0 | 0 | 0 | 1 | 0 | 0 | 0 | 1 | 1 | 1 |
| Cdh12    | 0 | 0 | 0 | 0 | 1 | 0 | 0 | 0 | 1 | 1 | 1 |
| Cdh19    | 0 | 0 | 0 | 0 | 1 | 0 | 0 | 0 | 1 | 1 | 1 |
| Cdh2     | 0 | 0 | 0 | 0 | 1 | 0 | 0 | 0 | 1 | 1 | 1 |
| Cdh6     | 0 | 0 | 0 | 0 | 1 | 0 | 0 | 0 | 1 | 1 | 1 |
| Cdhr3    | 0 | 0 | 0 | 0 | 1 | 0 | 0 | 0 | 1 | 1 | 1 |
| Cdk12    | 0 | 0 | 0 | 0 | 1 | 0 | 0 | 0 | 1 | 1 | 1 |
| Cdk2     | 0 | 0 | 0 | 0 | 1 | 0 | 0 | 0 | 1 | 1 | 1 |
| Cdk5rap3 | 0 | 0 | 0 | 0 | 1 | 0 | 0 | 0 | 1 | 1 | 1 |
| Cdkl2    | 0 | 0 | 0 | 0 | 1 | 0 | 0 | 0 | 1 | 1 | 1 |
| Cdkn3    | 0 | 0 | 0 | 0 | 1 | 0 | 0 | 0 | 1 | 1 | 1 |
| Cdr1     | 0 | 0 | 0 | 0 | 1 | 0 | 0 | 0 | 1 | 1 | 1 |
| Cdt1     | 0 | 0 | 0 | 0 | 1 | 0 | 0 | 0 | 1 | 1 | 1 |
| Cdyl2    | 0 | 0 | 0 | 0 | 1 | 0 | 0 | 0 | 1 | 1 | 1 |
| Ceacam5  | 0 | 0 | 0 | 0 | 1 | 0 | 0 | 0 | 1 | 1 | 1 |
| Cebpz    | 0 | 0 | 0 | 0 | 1 | 0 | 0 | 0 | 1 | 1 | 1 |
| Cela3a   | 0 | 0 | 0 | 0 | 1 | 0 | 0 | 0 | 1 | 1 | 1 |
| Celsr2   | 0 | 0 | 0 | 0 | 1 | 0 | 0 | 0 | 1 | 1 | 1 |
| Cemip    | 0 | 0 | 0 | 0 | 1 | 0 | 0 | 0 | 1 | 1 | 1 |
| Cenpe    | 0 | 0 | 0 | 0 | 1 | 0 | 0 | 0 | 1 | 1 | 1 |
| Cenpj    | 0 | 0 | 0 | 0 | 1 | 0 | 0 | 0 | 1 | 1 | 1 |
| Cenpm    | 0 | 0 | 0 | 0 | 1 | 0 | 0 | 0 | 1 | 1 | 1 |
| Cenpt    | 0 | 0 | 0 | 0 | 1 | 0 | 0 | 0 | 1 | 1 | 1 |
| Cep104   | 0 | 0 | 0 | 0 | 1 | 0 | 0 | 0 | 1 | 1 | 1 |
| Cep120   | 0 | 0 | 0 | 0 | 1 | 0 | 0 | 0 | 1 | 1 | 1 |
| Cep126   | 0 | 0 | 0 | 0 | 1 | 0 | 0 | 0 | 1 | 1 | 1 |

|         |   |   |   |   |   |   |   |   |   |   |   |
|---------|---|---|---|---|---|---|---|---|---|---|---|
| Cep162  | 0 | 0 | 0 | 0 | 1 | 0 | 0 | 0 | 1 | 1 | 1 |
| Cep164  | 0 | 0 | 0 | 0 | 1 | 0 | 0 | 0 | 1 | 1 | 1 |
| Cep250  | 0 | 0 | 0 | 0 | 1 | 0 | 0 | 0 | 1 | 1 | 1 |
| Cep350  | 0 | 0 | 0 | 0 | 1 | 0 | 0 | 0 | 1 | 1 | 1 |
| Cep68   | 0 | 0 | 0 | 0 | 1 | 0 | 0 | 0 | 1 | 1 | 1 |
| Cep89   | 0 | 0 | 0 | 0 | 0 | 1 | 0 | 0 | 1 | 1 | 1 |
| Cer1    | 0 | 0 | 0 | 0 | 1 | 0 | 0 | 0 | 1 | 1 | 1 |
| Cers2   | 0 | 0 | 0 | 0 | 1 | 0 | 0 | 0 | 1 | 1 | 1 |
| Cers3   | 0 | 0 | 0 | 0 | 0 | 1 | 0 | 0 | 1 | 1 | 1 |
| Ces2b   | 0 | 0 | 0 | 0 | 1 | 0 | 0 | 0 | 1 | 1 | 1 |
| Ces2g   | 0 | 0 | 0 | 0 | 1 | 0 | 0 | 0 | 1 | 1 | 1 |
| Cfap157 | 0 | 0 | 0 | 0 | 1 | 0 | 0 | 0 | 1 | 1 | 1 |
| Cfap97  | 0 | 0 | 0 | 0 | 1 | 0 | 0 | 0 | 1 | 1 | 1 |
| Cfl2    | 0 | 0 | 0 | 0 | 1 | 0 | 0 | 0 | 1 | 1 | 1 |
| Cflar   | 0 | 0 | 0 | 0 | 1 | 0 | 0 | 0 | 1 | 1 | 1 |
| Cftr    | 0 | 0 | 0 | 0 | 1 | 0 | 0 | 0 | 1 | 1 | 1 |
| Cgn     | 0 | 0 | 0 | 0 | 1 | 0 | 0 | 0 | 1 | 1 | 1 |
| Cgnl1   | 0 | 0 | 0 | 0 | 1 | 0 | 0 | 0 | 1 | 1 | 1 |
| Chadl   | 1 | 0 | 0 | 0 | 0 | 0 | 0 | 0 | 1 | 1 | 1 |
| Chd6    | 0 | 0 | 0 | 0 | 1 | 0 | 0 | 0 | 1 | 1 | 1 |
| Chd8    | 0 | 0 | 0 | 0 | 1 | 0 | 0 | 0 | 1 | 1 | 1 |
| Chd9    | 0 | 0 | 0 | 0 | 1 | 0 | 0 | 0 | 1 | 1 | 1 |
| Cherp   | 0 | 0 | 0 | 0 | 1 | 0 | 0 | 0 | 1 | 1 | 1 |
| Chic2   | 0 | 0 | 0 | 0 | 1 | 0 | 0 | 0 | 1 | 1 | 1 |
| Chil1   | 0 | 0 | 0 | 0 | 0 | 0 | 1 | 0 | 1 | 1 | 1 |
| Chml    | 0 | 0 | 0 | 0 | 1 | 0 | 0 | 0 | 1 | 1 | 1 |
| Chpf2   | 0 | 0 | 0 | 0 | 1 | 0 | 0 | 0 | 1 | 1 | 1 |
| Chrd    | 0 | 0 | 0 | 0 | 1 | 0 | 0 | 0 | 1 | 1 | 1 |
| Chrm1   | 0 | 0 | 0 | 0 | 1 | 0 | 0 | 0 | 1 | 1 | 1 |
| Chrm3   | 0 | 0 | 0 | 0 | 1 | 0 | 0 | 0 | 1 | 1 | 1 |
| Chrna7  | 0 | 0 | 0 | 0 | 1 | 0 | 0 | 0 | 1 | 1 | 1 |
| Chrb4   | 0 | 0 | 0 | 0 | 1 | 0 | 0 | 0 | 1 | 1 | 1 |
| Chst2   | 0 | 0 | 0 | 0 | 1 | 0 | 0 | 0 | 1 | 1 | 1 |

|         |   |   |   |   |   |   |   |   |   |   |   |
|---------|---|---|---|---|---|---|---|---|---|---|---|
| Ciart   | 0 | 0 | 0 | 0 | 1 | 0 | 0 | 0 | 1 | 1 | 1 |
| Clcn5   | 0 | 0 | 0 | 0 | 1 | 0 | 0 | 0 | 1 | 1 | 1 |
| Clcnkb  | 0 | 0 | 0 | 0 | 1 | 0 | 0 | 0 | 1 | 1 | 1 |
| Cldn12  | 0 | 0 | 0 | 0 | 1 | 0 | 0 | 0 | 1 | 1 | 1 |
| Cldn18  | 0 | 0 | 0 | 0 | 1 | 0 | 0 | 0 | 1 | 1 | 1 |
| Cldn5   | 0 | 0 | 0 | 0 | 1 | 0 | 0 | 0 | 1 | 1 | 1 |
| Cldn8   | 0 | 0 | 0 | 0 | 1 | 0 | 0 | 0 | 1 | 1 | 1 |
| Clec1b  | 0 | 0 | 0 | 0 | 1 | 0 | 0 | 0 | 1 | 1 | 1 |
| Clec4e  | 0 | 0 | 0 | 0 | 1 | 0 | 0 | 0 | 1 | 1 | 1 |
| Clip3   | 0 | 0 | 0 | 0 | 1 | 0 | 0 | 0 | 1 | 1 | 1 |
| Clmn    | 0 | 0 | 0 | 0 | 1 | 0 | 0 | 0 | 1 | 1 | 1 |
| Cln3    | 0 | 0 | 0 | 0 | 1 | 0 | 0 | 0 | 1 | 1 | 1 |
| Clpb    | 0 | 0 | 0 | 0 | 1 | 0 | 0 | 0 | 1 | 1 | 1 |
| Clspn   | 0 | 0 | 0 | 0 | 1 | 0 | 0 | 0 | 1 | 1 | 1 |
| Clstn2  | 0 | 0 | 0 | 0 | 1 | 0 | 0 | 0 | 1 | 1 | 1 |
| Cltc    | 0 | 0 | 0 | 0 | 1 | 0 | 0 | 0 | 1 | 1 | 1 |
| Clu     | 0 | 0 | 0 | 0 | 1 | 0 | 0 | 0 | 1 | 1 | 1 |
| Cluh    | 0 | 0 | 0 | 0 | 1 | 0 | 0 | 0 | 1 | 1 | 1 |
| Cmya5   | 0 | 0 | 0 | 0 | 1 | 0 | 0 | 0 | 1 | 1 | 1 |
| Cnot11  | 0 | 0 | 0 | 0 | 1 | 0 | 0 | 0 | 1 | 1 | 1 |
| Cnot3   | 0 | 0 | 0 | 0 | 1 | 0 | 0 | 0 | 1 | 1 | 1 |
| Cnot8   | 0 | 0 | 0 | 0 | 1 | 0 | 0 | 0 | 1 | 1 | 1 |
| Cnpy4   | 0 | 0 | 0 | 0 | 1 | 0 | 0 | 0 | 1 | 1 | 1 |
| Cntlh   | 0 | 0 | 0 | 0 | 1 | 0 | 0 | 0 | 1 | 1 | 1 |
| Cntn1   | 0 | 0 | 0 | 0 | 1 | 0 | 0 | 0 | 1 | 1 | 1 |
| Cntn2   | 0 | 0 | 0 | 0 | 1 | 0 | 0 | 0 | 1 | 1 | 1 |
| Cntn4   | 0 | 0 | 0 | 0 | 1 | 0 | 0 | 0 | 1 | 1 | 1 |
| Cntnap3 | 0 | 0 | 0 | 0 | 1 | 0 | 0 | 0 | 1 | 1 | 1 |
| Cntrl   | 0 | 0 | 0 | 0 | 0 | 1 | 0 | 0 | 1 | 1 | 1 |
| Coil    | 0 | 0 | 0 | 0 | 1 | 0 | 0 | 0 | 1 | 1 | 1 |
| Col12a1 | 0 | 0 | 0 | 0 | 1 | 0 | 0 | 0 | 1 | 1 | 1 |
| Col13a1 | 0 | 0 | 0 | 0 | 1 | 0 | 0 | 0 | 1 | 1 | 1 |
| Col15a1 | 0 | 0 | 0 | 0 | 1 | 0 | 0 | 0 | 1 | 1 | 1 |

|          |   |   |   |   |   |   |   |   |   |   |   |
|----------|---|---|---|---|---|---|---|---|---|---|---|
| Col16a1  | 0 | 0 | 0 | 0 | 1 | 0 | 0 | 0 | 1 | 1 | 1 |
| Col22a1  | 0 | 0 | 0 | 0 | 1 | 0 | 0 | 0 | 1 | 1 | 1 |
| Col24a1  | 0 | 0 | 0 | 0 | 1 | 0 | 0 | 0 | 1 | 1 | 1 |
| Col26a1  | 0 | 0 | 0 | 0 | 1 | 0 | 0 | 0 | 1 | 1 | 1 |
| Col2a1   | 0 | 0 | 0 | 0 | 1 | 0 | 0 | 0 | 1 | 1 | 1 |
| Col4a4   | 0 | 0 | 0 | 0 | 1 | 0 | 0 | 0 | 1 | 1 | 1 |
| Col5a1   | 0 | 0 | 0 | 0 | 1 | 0 | 0 | 0 | 1 | 1 | 1 |
| Col6a4   | 0 | 0 | 0 | 0 | 1 | 0 | 0 | 0 | 1 | 1 | 1 |
| Col6a5   | 0 | 0 | 0 | 0 | 1 | 0 | 0 | 0 | 1 | 1 | 1 |
| Colec12  | 0 | 0 | 0 | 0 | 1 | 0 | 0 | 0 | 1 | 1 | 1 |
| Colgalt2 | 0 | 0 | 0 | 0 | 1 | 0 | 0 | 0 | 1 | 1 | 1 |
| Commd3   | 0 | 0 | 0 | 0 | 1 | 0 | 0 | 0 | 1 | 1 | 1 |
| Cope     | 0 | 0 | 0 | 0 | 1 | 0 | 0 | 0 | 1 | 1 | 1 |
| Cops4    | 0 | 0 | 0 | 0 | 1 | 0 | 0 | 0 | 1 | 1 | 1 |
| Cops7b   | 0 | 0 | 0 | 0 | 1 | 0 | 0 | 0 | 1 | 1 | 1 |
| Coq2     | 0 | 0 | 0 | 0 | 1 | 0 | 0 | 0 | 1 | 1 | 1 |
| Coq5     | 0 | 0 | 0 | 0 | 0 | 0 | 1 | 0 | 1 | 1 | 1 |
| Coq8a    | 0 | 0 | 0 | 0 | 1 | 0 | 0 | 0 | 1 | 1 | 1 |
| Cox15    | 0 | 0 | 0 | 0 | 0 | 1 | 0 | 0 | 1 | 1 | 1 |
| Cpa2     | 0 | 0 | 0 | 0 | 1 | 0 | 0 | 0 | 1 | 1 | 1 |
| Cpd      | 0 | 0 | 0 | 0 | 1 | 0 | 0 | 0 | 1 | 1 | 1 |
| Cplx2    | 0 | 0 | 0 | 0 | 1 | 0 | 0 | 0 | 1 | 1 | 1 |
| Cpped1   | 0 | 0 | 0 | 0 | 1 | 0 | 0 | 0 | 1 | 1 | 1 |
| Cps1     | 0 | 0 | 0 | 0 | 1 | 0 | 0 | 0 | 1 | 1 | 1 |
| Cpsf6    | 0 | 0 | 0 | 0 | 1 | 0 | 0 | 0 | 1 | 1 | 1 |
| Cpxm1    | 0 | 0 | 0 | 0 | 1 | 0 | 0 | 0 | 1 | 1 | 1 |
| Cr1l     | 0 | 0 | 0 | 0 | 0 | 0 | 1 | 0 | 1 | 1 | 1 |
| Crb1     | 0 | 0 | 0 | 0 | 1 | 0 | 0 | 0 | 1 | 1 | 1 |
| Creb3l1  | 0 | 0 | 0 | 0 | 1 | 0 | 0 | 0 | 1 | 1 | 1 |
| Creb3l3  | 0 | 0 | 0 | 0 | 0 | 1 | 0 | 0 | 1 | 1 | 1 |
| Crebbp   | 0 | 0 | 0 | 0 | 1 | 0 | 0 | 0 | 1 | 1 | 1 |
| Crlf3    | 0 | 0 | 0 | 0 | 1 | 0 | 0 | 0 | 1 | 1 | 1 |
| Crocc    | 0 | 0 | 0 | 0 | 1 | 0 | 0 | 0 | 1 | 1 | 1 |

|         |   |   |   |   |   |   |   |   |   |   |   |
|---------|---|---|---|---|---|---|---|---|---|---|---|
| Crtc2   | 0 | 0 | 0 | 0 | 1 | 0 | 0 | 0 | 1 | 1 | 1 |
| Cry1    | 0 | 0 | 0 | 0 | 1 | 0 | 0 | 0 | 1 | 1 | 1 |
| Crygb   | 0 | 0 | 0 | 0 | 1 | 0 | 0 | 0 | 1 | 1 | 1 |
| Csde1   | 0 | 0 | 0 | 0 | 0 | 0 | 1 | 0 | 1 | 1 | 1 |
| Csf2rb  | 0 | 0 | 0 | 0 | 1 | 0 | 0 | 0 | 1 | 1 | 1 |
| Csn2    | 0 | 0 | 0 | 0 | 1 | 0 | 0 | 0 | 1 | 1 | 1 |
| Csnk1e  | 0 | 0 | 0 | 0 | 1 | 0 | 0 | 0 | 1 | 1 | 1 |
| Cspg4   | 0 | 0 | 0 | 0 | 1 | 0 | 0 | 0 | 1 | 1 | 1 |
| Cspp1   | 0 | 0 | 0 | 0 | 1 | 0 | 0 | 0 | 1 | 1 | 1 |
| Csrnp1  | 0 | 0 | 0 | 0 | 1 | 0 | 0 | 0 | 1 | 1 | 1 |
| Cstf2t  | 0 | 0 | 0 | 0 | 1 | 0 | 0 | 0 | 1 | 1 | 1 |
| Ctbp2   | 0 | 0 | 0 | 0 | 1 | 0 | 0 | 0 | 1 | 1 | 1 |
| Ctcf    | 0 | 0 | 0 | 0 | 1 | 0 | 0 | 0 | 1 | 1 | 1 |
| Ctif    | 0 | 0 | 0 | 0 | 1 | 0 | 0 | 0 | 1 | 1 | 1 |
| Ctnna1  | 0 | 0 | 0 | 0 | 1 | 0 | 0 | 0 | 1 | 1 | 1 |
| Ctnnb1  | 0 | 0 | 0 | 0 | 1 | 0 | 0 | 0 | 1 | 1 | 1 |
| Ctps    | 0 | 0 | 0 | 0 | 0 | 1 | 0 | 0 | 1 | 1 | 1 |
| Ctps2   | 0 | 0 | 0 | 0 | 1 | 0 | 0 | 0 | 1 | 1 | 1 |
| Ctsr    | 0 | 0 | 0 | 0 | 1 | 0 | 0 | 0 | 1 | 1 | 1 |
| Ctnn    | 0 | 0 | 0 | 0 | 1 | 0 | 0 | 0 | 1 | 1 | 1 |
| Cttnbp2 | 0 | 0 | 0 | 0 | 1 | 0 | 0 | 0 | 1 | 1 | 1 |
| Cul2    | 0 | 0 | 0 | 0 | 0 | 0 | 1 | 0 | 1 | 1 | 1 |
| Cutal   | 0 | 0 | 0 | 0 | 1 | 0 | 0 | 0 | 1 | 1 | 1 |
| Cxcl16  | 0 | 0 | 0 | 0 | 1 | 0 | 0 | 0 | 1 | 1 | 1 |
| Cxcl2   | 0 | 0 | 0 | 0 | 1 | 0 | 0 | 0 | 1 | 1 | 1 |
| Cxcr2   | 0 | 0 | 0 | 0 | 1 | 0 | 0 | 0 | 1 | 1 | 1 |
| Cxcr5   | 0 | 0 | 0 | 0 | 0 | 0 | 1 | 0 | 1 | 1 | 1 |
| Cylc1   | 0 | 0 | 0 | 0 | 1 | 0 | 0 | 0 | 1 | 1 | 1 |
| Cyp1a1  | 0 | 0 | 0 | 0 | 1 | 0 | 0 | 0 | 1 | 1 | 1 |
| Cyp26b1 | 0 | 0 | 0 | 0 | 1 | 0 | 0 | 0 | 1 | 1 | 1 |
| Cyp2a4  | 0 | 0 | 0 | 0 | 1 | 0 | 0 | 0 | 1 | 1 | 1 |
| Cyp2a5  | 0 | 0 | 0 | 0 | 1 | 0 | 0 | 0 | 1 | 1 | 1 |
| Cyp2b23 | 0 | 0 | 0 | 0 | 0 | 1 | 0 | 0 | 1 | 1 | 1 |

|           |   |   |   |   |   |   |   |   |   |   |   |
|-----------|---|---|---|---|---|---|---|---|---|---|---|
| Cyp2c37   | 0 | 0 | 0 | 0 | 1 | 0 | 0 | 0 | 1 | 1 | 1 |
| Cyp2c50   | 0 | 0 | 0 | 0 | 1 | 0 | 0 | 0 | 1 | 1 | 1 |
| Cyp2c68   | 0 | 0 | 0 | 0 | 1 | 0 | 0 | 0 | 1 | 1 | 1 |
| Cyp2c69   | 0 | 0 | 0 | 0 | 1 | 0 | 0 | 0 | 1 | 1 | 1 |
| Cyp2c70   | 0 | 0 | 0 | 0 | 1 | 0 | 0 | 0 | 1 | 1 | 1 |
| Cyp2d11   | 0 | 0 | 0 | 0 | 1 | 0 | 0 | 0 | 1 | 1 | 1 |
| Cyp2d34   | 0 | 0 | 0 | 0 | 1 | 0 | 0 | 0 | 1 | 1 | 1 |
| Cyp2g1    | 0 | 0 | 0 | 0 | 0 | 1 | 0 | 0 | 1 | 1 | 1 |
| Cyp2r1    | 0 | 0 | 0 | 0 | 1 | 0 | 0 | 0 | 1 | 1 | 1 |
| Cyp3a11   | 0 | 0 | 0 | 0 | 1 | 0 | 0 | 0 | 1 | 1 | 1 |
| Cyp3a25   | 0 | 0 | 0 | 0 | 1 | 0 | 0 | 0 | 1 | 1 | 1 |
| Cyp4a29   | 0 | 0 | 0 | 0 | 1 | 0 | 0 | 0 | 1 | 1 | 1 |
| Cyp4a32   | 0 | 0 | 0 | 0 | 1 | 0 | 0 | 0 | 1 | 1 | 1 |
| Cyp4f13   | 0 | 0 | 0 | 0 | 0 | 0 | 1 | 0 | 1 | 1 | 1 |
| Cyp4v3    | 0 | 0 | 0 | 0 | 0 | 0 | 1 | 0 | 1 | 1 | 1 |
| Cyp4x1    | 0 | 0 | 0 | 0 | 1 | 0 | 0 | 0 | 1 | 1 | 1 |
| D130052Bf | 0 | 0 | 0 | 0 | 1 | 0 | 0 | 0 | 1 | 1 | 1 |
| Dach1     | 0 | 0 | 0 | 0 | 1 | 0 | 0 | 0 | 1 | 1 | 1 |
| Dach2     | 0 | 0 | 0 | 0 | 1 | 0 | 0 | 0 | 1 | 1 | 1 |
| Dact3     | 0 | 0 | 0 | 0 | 1 | 0 | 0 | 0 | 1 | 1 | 1 |
| Dapp1     | 0 | 0 | 0 | 0 | 1 | 0 | 0 | 0 | 1 | 1 | 1 |
| Dars      | 0 | 0 | 0 | 0 | 1 | 0 | 0 | 0 | 1 | 1 | 1 |
| Dars2     | 0 | 0 | 0 | 0 | 1 | 0 | 0 | 0 | 1 | 1 | 1 |
| Dbr1      | 0 | 0 | 0 | 0 | 1 | 0 | 0 | 0 | 1 | 1 | 1 |
| Dcaf17    | 0 | 0 | 0 | 0 | 0 | 0 | 1 | 0 | 1 | 1 | 1 |
| Dcaf6     | 0 | 0 | 0 | 0 | 1 | 0 | 0 | 0 | 1 | 1 | 1 |
| Dclk3     | 0 | 0 | 0 | 0 | 1 | 0 | 0 | 0 | 1 | 1 | 1 |
| Dclre1a   | 0 | 0 | 0 | 0 | 1 | 0 | 0 | 0 | 1 | 1 | 1 |
| Dclre1b   | 0 | 0 | 0 | 0 | 1 | 0 | 0 | 0 | 1 | 1 | 1 |
| Dcp2      | 0 | 0 | 0 | 0 | 0 | 0 | 1 | 0 | 1 | 1 | 1 |
| Ddhd1     | 0 | 0 | 0 | 0 | 1 | 0 | 0 | 0 | 1 | 1 | 1 |
| Ddx10     | 0 | 0 | 0 | 0 | 0 | 1 | 0 | 0 | 1 | 1 | 1 |
| Ddx18     | 0 | 0 | 0 | 0 | 1 | 0 | 0 | 0 | 1 | 1 | 1 |



|         |   |   |   |   |   |   |   |   |   |   |   |
|---------|---|---|---|---|---|---|---|---|---|---|---|
| Ddx20   | 0 | 0 | 0 | 0 | 1 | 0 | 0 | 0 | 1 | 1 | 1 |
| Ddx23   | 0 | 0 | 0 | 0 | 1 | 0 | 0 | 0 | 1 | 1 | 1 |
| Ddx3y   | 0 | 0 | 0 | 0 | 1 | 0 | 0 | 0 | 1 | 1 | 1 |
| Ddx4    | 0 | 0 | 0 | 0 | 1 | 0 | 0 | 0 | 1 | 1 | 1 |
| Ddx41   | 0 | 0 | 0 | 0 | 1 | 0 | 0 | 0 | 1 | 1 | 1 |
| Ddx5    | 0 | 0 | 0 | 0 | 1 | 0 | 0 | 0 | 1 | 1 | 1 |
| Ddx50   | 0 | 0 | 0 | 0 | 1 | 0 | 0 | 0 | 1 | 1 | 1 |
| Ddx51   | 0 | 0 | 0 | 0 | 1 | 0 | 0 | 0 | 1 | 1 | 1 |
| Ddx56   | 0 | 0 | 0 | 0 | 1 | 0 | 0 | 0 | 1 | 1 | 1 |
| Deaf1   | 0 | 0 | 0 | 0 | 1 | 0 | 0 | 0 | 1 | 1 | 1 |
| Dedd    | 0 | 0 | 0 | 0 | 1 | 0 | 0 | 0 | 1 | 1 | 1 |
| Defb21  | 0 | 0 | 0 | 0 | 1 | 0 | 0 | 0 | 1 | 1 | 1 |
| Dennd1b | 0 | 0 | 0 | 0 | 0 | 0 | 1 | 0 | 1 | 1 | 1 |
| Dennd1c | 0 | 0 | 0 | 0 | 1 | 0 | 0 | 0 | 1 | 1 | 1 |
| Dennd3  | 0 | 0 | 0 | 0 | 1 | 0 | 0 | 0 | 1 | 1 | 1 |
| Dennd6a | 0 | 0 | 0 | 0 | 1 | 0 | 0 | 0 | 1 | 1 | 1 |
| Depdc5  | 0 | 0 | 0 | 0 | 1 | 0 | 0 | 0 | 1 | 1 | 1 |
| Dgcr2   | 0 | 0 | 0 | 0 | 1 | 0 | 0 | 0 | 1 | 1 | 1 |
| Dgcr8   | 0 | 0 | 0 | 0 | 1 | 0 | 0 | 0 | 1 | 1 | 1 |
| Dgkd    | 0 | 0 | 0 | 0 | 1 | 0 | 0 | 0 | 1 | 1 | 1 |
| Dgke    | 0 | 0 | 0 | 0 | 1 | 0 | 0 | 0 | 1 | 1 | 1 |
| Dhrs9   | 0 | 0 | 0 | 0 | 1 | 0 | 0 | 0 | 1 | 1 | 1 |
| Dhx15   | 0 | 0 | 0 | 0 | 1 | 0 | 0 | 0 | 1 | 1 | 1 |
| Dhx38   | 0 | 0 | 0 | 0 | 1 | 0 | 0 | 0 | 1 | 1 | 1 |
| Diaph1  | 0 | 0 | 0 | 0 | 1 | 0 | 0 | 0 | 1 | 1 | 1 |
| Dicer1  | 0 | 0 | 0 | 0 | 1 | 0 | 0 | 0 | 1 | 1 | 1 |
| Dip2a   | 0 | 0 | 0 | 0 | 0 | 0 | 1 | 0 | 1 | 1 | 1 |
| Dip2b   | 0 | 0 | 0 | 0 | 1 | 0 | 0 | 0 | 1 | 1 | 1 |
| Dip2c   | 0 | 0 | 0 | 0 | 1 | 0 | 0 | 0 | 1 | 1 | 1 |
| Dis3    | 0 | 0 | 0 | 0 | 1 | 0 | 0 | 0 | 1 | 1 | 1 |
| Dis3l2  | 0 | 0 | 0 | 0 | 1 | 0 | 0 | 0 | 1 | 1 | 1 |
| Dixdc1  | 0 | 0 | 0 | 0 | 1 | 0 | 0 | 0 | 1 | 1 | 1 |
| Dlc1    | 0 | 0 | 0 | 0 | 1 | 0 | 0 | 0 | 1 | 1 | 1 |

|          |   |   |   |   |   |   |   |   |   |   |   |
|----------|---|---|---|---|---|---|---|---|---|---|---|
| Dlg1     | 0 | 0 | 0 | 0 | 1 | 0 | 0 | 0 | 1 | 1 | 1 |
| Dlk2     | 0 | 0 | 0 | 0 | 0 | 0 | 1 | 0 | 1 | 1 | 1 |
| Dmd      | 0 | 0 | 0 | 0 | 1 | 0 | 0 | 0 | 1 | 1 | 1 |
| Dmpk     | 0 | 0 | 0 | 0 | 1 | 0 | 0 | 0 | 1 | 1 | 1 |
| Dmrtc2   | 0 | 0 | 0 | 0 | 0 | 1 | 0 | 0 | 1 | 1 | 1 |
| Dnaaf2   | 0 | 0 | 0 | 0 | 1 | 0 | 0 | 0 | 1 | 1 | 1 |
| Dnaaf3   | 0 | 0 | 0 | 0 | 1 | 0 | 0 | 0 | 1 | 1 | 1 |
| Dnah12   | 0 | 0 | 0 | 0 | 0 | 0 | 1 | 0 | 1 | 1 | 1 |
| Dnah14   | 0 | 0 | 0 | 0 | 1 | 0 | 0 | 0 | 1 | 1 | 1 |
| Dnah7b   | 0 | 0 | 0 | 0 | 1 | 0 | 0 | 0 | 1 | 1 | 1 |
| Dnajib13 | 0 | 0 | 0 | 0 | 1 | 0 | 0 | 0 | 1 | 1 | 1 |
| Dnajib3  | 0 | 0 | 0 | 0 | 1 | 0 | 0 | 0 | 1 | 1 | 1 |
| Dnajc1   | 0 | 0 | 0 | 0 | 1 | 0 | 0 | 0 | 1 | 1 | 1 |
| Dnajc22  | 0 | 0 | 0 | 0 | 1 | 0 | 0 | 0 | 1 | 1 | 1 |
| Dnajc24  | 0 | 0 | 0 | 0 | 0 | 0 | 1 | 0 | 1 | 1 | 1 |
| Dnajc28  | 0 | 0 | 0 | 0 | 1 | 0 | 0 | 0 | 1 | 1 | 1 |
| Dnajc7   | 0 | 0 | 0 | 0 | 1 | 0 | 0 | 0 | 1 | 1 | 1 |
| Dnm1l    | 0 | 0 | 0 | 0 | 1 | 0 | 0 | 0 | 1 | 1 | 1 |
| Dnm2     | 0 | 0 | 0 | 0 | 1 | 0 | 0 | 0 | 1 | 1 | 1 |
| Dntt     | 0 | 0 | 0 | 0 | 1 | 0 | 0 | 0 | 1 | 1 | 1 |
| Dock10   | 0 | 0 | 0 | 0 | 0 | 0 | 1 | 0 | 1 | 1 | 1 |
| Dock2    | 0 | 0 | 0 | 0 | 1 | 0 | 0 | 0 | 1 | 1 | 1 |
| Dock3    | 0 | 0 | 0 | 0 | 0 | 0 | 1 | 0 | 1 | 1 | 1 |
| Dock9    | 0 | 0 | 0 | 0 | 1 | 0 | 0 | 0 | 1 | 1 | 1 |
| Dot1l    | 0 | 0 | 0 | 0 | 1 | 0 | 0 | 0 | 1 | 1 | 1 |
| Dpf1     | 0 | 0 | 0 | 0 | 1 | 0 | 0 | 0 | 1 | 1 | 1 |
| Dpf2     | 0 | 0 | 0 | 0 | 1 | 0 | 0 | 0 | 1 | 1 | 1 |
| Dpf3     | 0 | 0 | 0 | 0 | 1 | 0 | 0 | 0 | 1 | 1 | 1 |
| Dpm1     | 0 | 0 | 0 | 0 | 1 | 0 | 0 | 0 | 1 | 1 | 1 |
| Dppa4    | 0 | 0 | 0 | 0 | 1 | 0 | 0 | 0 | 1 | 1 | 1 |
| Dpy19l2  | 0 | 0 | 0 | 0 | 0 | 0 | 1 | 0 | 1 | 1 | 1 |
| Drosha   | 0 | 0 | 0 | 0 | 1 | 0 | 0 | 0 | 1 | 1 | 1 |
| Drp2     | 0 | 0 | 0 | 0 | 1 | 0 | 0 | 0 | 1 | 1 | 1 |

|           |   |   |   |   |   |   |   |   |   |   |   |
|-----------|---|---|---|---|---|---|---|---|---|---|---|
| Dscam1l   | 0 | 0 | 0 | 0 | 1 | 0 | 0 | 0 | 1 | 1 | 1 |
| Dsg1c     | 0 | 0 | 0 | 0 | 1 | 0 | 0 | 0 | 1 | 1 | 1 |
| Dsg4      | 0 | 0 | 0 | 0 | 1 | 0 | 0 | 0 | 1 | 1 | 1 |
| Dtna      | 0 | 0 | 0 | 0 | 0 | 1 | 0 | 0 | 1 | 1 | 1 |
| Dtx3l     | 0 | 0 | 0 | 0 | 1 | 0 | 0 | 0 | 1 | 1 | 1 |
| Duox1     | 0 | 0 | 0 | 0 | 1 | 0 | 0 | 0 | 1 | 1 | 1 |
| Duox2     | 0 | 0 | 0 | 0 | 1 | 0 | 0 | 0 | 1 | 1 | 1 |
| Dus2      | 0 | 0 | 0 | 0 | 1 | 0 | 0 | 0 | 1 | 1 | 1 |
| Dus3l     | 0 | 0 | 0 | 0 | 1 | 0 | 0 | 0 | 1 | 1 | 1 |
| Dusp11    | 0 | 0 | 0 | 0 | 1 | 0 | 0 | 0 | 1 | 1 | 1 |
| Dusp14    | 0 | 0 | 0 | 0 | 1 | 0 | 0 | 0 | 1 | 1 | 1 |
| Dusp27    | 0 | 0 | 0 | 0 | 1 | 0 | 0 | 0 | 1 | 1 | 1 |
| Dvl3      | 0 | 0 | 0 | 0 | 1 | 0 | 0 | 0 | 1 | 1 | 1 |
| Dync1h1   | 0 | 0 | 0 | 0 | 1 | 0 | 0 | 0 | 1 | 1 | 1 |
| Dync1li1  | 0 | 0 | 0 | 0 | 1 | 0 | 0 | 0 | 1 | 1 | 1 |
| Dyrk1a    | 0 | 0 | 0 | 0 | 1 | 0 | 0 | 0 | 1 | 1 | 1 |
| E2f7      | 0 | 0 | 0 | 0 | 1 | 0 | 0 | 0 | 1 | 1 | 1 |
| E430018J2 | 0 | 0 | 0 | 0 | 1 | 0 | 0 | 0 | 1 | 1 | 1 |
| Eci3      | 0 | 0 | 0 | 0 | 1 | 0 | 0 | 0 | 1 | 1 | 1 |
| Edc4      | 0 | 0 | 0 | 0 | 1 | 0 | 0 | 0 | 1 | 1 | 1 |
| Edem3     | 0 | 0 | 0 | 0 | 1 | 0 | 0 | 0 | 1 | 1 | 1 |
| Eef2kmt   | 0 | 0 | 0 | 0 | 1 | 0 | 0 | 0 | 1 | 1 | 1 |
| Eepd1     | 0 | 0 | 0 | 0 | 1 | 0 | 0 | 0 | 1 | 1 | 1 |
| Efl1      | 0 | 0 | 0 | 0 | 1 | 0 | 0 | 0 | 1 | 1 | 1 |
| Efnb1     | 0 | 0 | 0 | 0 | 1 | 0 | 0 | 0 | 1 | 1 | 1 |
| Efr3a     | 0 | 0 | 0 | 0 | 0 | 0 | 1 | 0 | 1 | 1 | 1 |
| Ehhadh    | 0 | 0 | 0 | 0 | 1 | 0 | 0 | 0 | 1 | 1 | 1 |
| Eif2a     | 0 | 0 | 0 | 0 | 0 | 0 | 1 | 0 | 1 | 1 | 1 |
| Eif2ak2   | 0 | 0 | 0 | 0 | 1 | 0 | 0 | 0 | 1 | 1 | 1 |
| Eif2ak3   | 0 | 0 | 0 | 0 | 1 | 0 | 0 | 0 | 1 | 1 | 1 |
| Eif2b1    | 0 | 0 | 0 | 0 | 1 | 0 | 0 | 0 | 1 | 1 | 1 |
| Eif4g3    | 0 | 0 | 0 | 0 | 1 | 0 | 0 | 0 | 1 | 1 | 1 |
| Elf3      | 0 | 0 | 0 | 0 | 1 | 0 | 0 | 0 | 1 | 1 | 1 |



|          |   |   |   |   |   |   |   |   |   |   |   |
|----------|---|---|---|---|---|---|---|---|---|---|---|
| Esrra    | 0 | 0 | 0 | 0 | 1 | 0 | 0 | 0 | 1 | 1 | 1 |
| Etaa1    | 0 | 0 | 0 | 0 | 1 | 0 | 0 | 0 | 1 | 1 | 1 |
| Ets2     | 0 | 0 | 0 | 0 | 1 | 0 | 0 | 0 | 1 | 1 | 1 |
| Etv4     | 0 | 0 | 0 | 0 | 1 | 0 | 0 | 0 | 1 | 1 | 1 |
| Exoc3    | 0 | 0 | 0 | 0 | 1 | 0 | 0 | 0 | 1 | 1 | 1 |
| Exoc3l4  | 0 | 0 | 0 | 0 | 1 | 0 | 0 | 0 | 1 | 1 | 1 |
| Exph5    | 0 | 0 | 0 | 0 | 1 | 0 | 0 | 0 | 1 | 1 | 1 |
| Ezh2     | 0 | 0 | 0 | 0 | 1 | 0 | 0 | 0 | 1 | 1 | 1 |
| Fahd1    | 0 | 0 | 0 | 0 | 1 | 0 | 0 | 0 | 1 | 1 | 1 |
| Faiml    | 0 | 0 | 0 | 0 | 1 | 0 | 0 | 0 | 1 | 1 | 1 |
| Fam107a  | 0 | 0 | 0 | 0 | 1 | 0 | 0 | 0 | 1 | 1 | 1 |
| Fam110b  | 0 | 0 | 0 | 0 | 1 | 0 | 0 | 0 | 1 | 1 | 1 |
| Fam111a  | 0 | 0 | 0 | 0 | 1 | 0 | 0 | 0 | 1 | 1 | 1 |
| Fam120b  | 0 | 0 | 0 | 0 | 1 | 0 | 0 | 0 | 1 | 1 | 1 |
| Fam120c  | 0 | 0 | 0 | 0 | 1 | 0 | 0 | 0 | 1 | 1 | 1 |
| Fam129a  | 0 | 0 | 0 | 0 | 1 | 0 | 0 | 0 | 1 | 1 | 1 |
| Fam129b  | 0 | 0 | 0 | 0 | 0 | 0 | 1 | 0 | 1 | 1 | 1 |
| Fam134b  | 0 | 0 | 0 | 0 | 1 | 0 | 0 | 0 | 1 | 1 | 1 |
| Fam135a  | 0 | 0 | 0 | 0 | 1 | 0 | 0 | 0 | 1 | 1 | 1 |
| Fam160a2 | 0 | 0 | 0 | 0 | 1 | 0 | 0 | 0 | 1 | 1 | 1 |
| Fam160b1 | 0 | 0 | 0 | 0 | 1 | 0 | 0 | 0 | 1 | 1 | 1 |
| Fam161b  | 0 | 0 | 0 | 0 | 1 | 0 | 0 | 0 | 1 | 1 | 1 |
| Fam184b  | 0 | 0 | 0 | 0 | 1 | 0 | 0 | 0 | 1 | 1 | 1 |
| Fam185a  | 0 | 0 | 0 | 0 | 1 | 0 | 0 | 0 | 1 | 1 | 1 |
| Fam208b  | 0 | 0 | 0 | 0 | 1 | 0 | 0 | 0 | 1 | 1 | 1 |
| Fam222a  | 0 | 0 | 0 | 0 | 1 | 0 | 0 | 0 | 1 | 1 | 1 |
| Fam3c    | 0 | 0 | 0 | 0 | 1 | 0 | 0 | 0 | 1 | 1 | 1 |
| Fam45a   | 0 | 0 | 0 | 0 | 1 | 0 | 0 | 0 | 1 | 1 | 1 |
| Fam50b   | 0 | 0 | 0 | 0 | 1 | 0 | 0 | 0 | 1 | 1 | 1 |
| Fam71d   | 0 | 0 | 0 | 0 | 1 | 0 | 0 | 0 | 1 | 1 | 1 |
| Fam98c   | 0 | 0 | 0 | 0 | 1 | 0 | 0 | 0 | 1 | 1 | 1 |
| Fan1     | 0 | 0 | 0 | 0 | 1 | 0 | 0 | 0 | 1 | 1 | 1 |
| Fancg    | 0 | 0 | 0 | 0 | 1 | 0 | 0 | 0 | 1 | 1 | 1 |

|         |   |   |   |   |   |   |   |   |   |   |   |
|---------|---|---|---|---|---|---|---|---|---|---|---|
| Fanci   | 0 | 0 | 0 | 0 | 1 | 0 | 0 | 0 | 1 | 1 | 1 |
| Fancm   | 0 | 0 | 0 | 0 | 1 | 0 | 0 | 0 | 1 | 1 | 1 |
| Fank1   | 0 | 0 | 0 | 0 | 1 | 0 | 0 | 0 | 1 | 1 | 1 |
| Fas     | 0 | 0 | 0 | 0 | 1 | 0 | 0 | 0 | 1 | 1 | 1 |
| Fasn    | 0 | 0 | 0 | 0 | 1 | 0 | 0 | 0 | 1 | 1 | 1 |
| Fastkd2 | 0 | 0 | 0 | 0 | 1 | 0 | 0 | 0 | 1 | 1 | 1 |
| Fastkd3 | 0 | 0 | 0 | 0 | 1 | 0 | 0 | 0 | 1 | 1 | 1 |
| Fbn2    | 0 | 0 | 0 | 0 | 1 | 0 | 0 | 0 | 1 | 1 | 1 |
| Fbxl18  | 0 | 0 | 0 | 0 | 1 | 0 | 0 | 0 | 1 | 1 | 1 |
| Fbxl3   | 0 | 0 | 0 | 0 | 1 | 0 | 0 | 0 | 1 | 1 | 1 |
| Fbxo16  | 0 | 0 | 0 | 0 | 1 | 0 | 0 | 0 | 1 | 1 | 1 |
| Fbxo27  | 0 | 0 | 0 | 0 | 1 | 0 | 0 | 0 | 1 | 1 | 1 |
| Fbxo31  | 0 | 0 | 0 | 0 | 0 | 0 | 1 | 0 | 1 | 1 | 1 |
| Fbxo38  | 0 | 0 | 0 | 0 | 1 | 0 | 0 | 0 | 1 | 1 | 1 |
| Fbxo45  | 0 | 0 | 0 | 0 | 1 | 0 | 0 | 0 | 1 | 1 | 1 |
| Fbxo5   | 0 | 0 | 0 | 0 | 1 | 0 | 0 | 0 | 1 | 1 | 1 |
| Fbxw10  | 0 | 0 | 0 | 0 | 1 | 0 | 0 | 0 | 1 | 1 | 1 |
| Fbxw9   | 0 | 0 | 0 | 0 | 1 | 0 | 0 | 0 | 1 | 1 | 1 |
| Fcer2a  | 0 | 0 | 0 | 0 | 1 | 0 | 0 | 0 | 1 | 1 | 1 |
| Fcgr4   | 0 | 0 | 0 | 0 | 1 | 0 | 0 | 0 | 1 | 1 | 1 |
| Fchsd2  | 0 | 0 | 0 | 0 | 1 | 0 | 0 | 0 | 1 | 1 | 1 |
| Fcrlb   | 0 | 0 | 0 | 0 | 1 | 0 | 0 | 0 | 1 | 1 | 1 |
| Fcrls   | 0 | 0 | 0 | 0 | 0 | 1 | 0 | 0 | 1 | 1 | 1 |
| Fdxacb1 | 0 | 0 | 0 | 0 | 0 | 1 | 0 | 0 | 1 | 1 | 1 |
| Fem1a   | 0 | 0 | 0 | 0 | 1 | 0 | 0 | 0 | 1 | 1 | 1 |
| Fem1c   | 0 | 0 | 0 | 0 | 1 | 0 | 0 | 0 | 1 | 1 | 1 |
| Ffar1   | 0 | 0 | 0 | 0 | 1 | 0 | 0 | 0 | 1 | 1 | 1 |
| Fgd5    | 0 | 0 | 0 | 0 | 1 | 0 | 0 | 0 | 1 | 1 | 1 |
| Fgf14   | 0 | 0 | 0 | 0 | 1 | 0 | 0 | 0 | 1 | 1 | 1 |
| Fgf4    | 0 | 0 | 0 | 0 | 1 | 0 | 0 | 0 | 1 | 1 | 1 |
| Fgfbp1  | 0 | 0 | 0 | 0 | 1 | 0 | 0 | 0 | 1 | 1 | 1 |
| Fgfr3   | 0 | 0 | 0 | 0 | 1 | 0 | 0 | 0 | 1 | 1 | 1 |
| Fgfr4   | 0 | 0 | 0 | 0 | 1 | 0 | 0 | 0 | 1 | 1 | 1 |

|         |   |   |   |   |   |   |   |   |   |   |   |
|---------|---|---|---|---|---|---|---|---|---|---|---|
| Fggy    | 0 | 0 | 0 | 0 | 1 | 0 | 0 | 0 | 1 | 1 | 1 |
| Fhl2    | 0 | 0 | 0 | 0 | 1 | 0 | 0 | 0 | 1 | 1 | 1 |
| Fhod1   | 0 | 0 | 0 | 0 | 1 | 0 | 0 | 0 | 1 | 1 | 1 |
| Filip1l | 0 | 0 | 0 | 0 | 1 | 0 | 0 | 0 | 1 | 1 | 1 |
| Fip1l1  | 0 | 0 | 0 | 0 | 1 | 0 | 0 | 0 | 1 | 1 | 1 |
| Fkbp11  | 0 | 0 | 0 | 0 | 1 | 0 | 0 | 0 | 1 | 1 | 1 |
| Fmn12   | 0 | 0 | 0 | 0 | 1 | 0 | 0 | 0 | 1 | 1 | 1 |
| Fmn13   | 0 | 0 | 0 | 0 | 1 | 0 | 0 | 0 | 1 | 1 | 1 |
| Fn3k    | 0 | 0 | 0 | 0 | 1 | 0 | 0 | 0 | 1 | 1 | 1 |
| Fndc3b  | 0 | 0 | 0 | 0 | 1 | 0 | 0 | 0 | 1 | 1 | 1 |
| Fndc5   | 0 | 0 | 0 | 0 | 1 | 0 | 0 | 0 | 1 | 1 | 1 |
| Fnip1   | 0 | 0 | 0 | 0 | 1 | 0 | 0 | 0 | 1 | 1 | 1 |
| Fntb    | 0 | 0 | 0 | 0 | 1 | 0 | 0 | 0 | 1 | 1 | 1 |
| Fopnl   | 0 | 0 | 0 | 0 | 1 | 0 | 0 | 0 | 1 | 1 | 1 |
| Foxl2   | 0 | 0 | 0 | 0 | 1 | 0 | 0 | 0 | 1 | 1 | 1 |
| Foxm1   | 0 | 0 | 0 | 0 | 1 | 0 | 0 | 0 | 1 | 1 | 1 |
| Foxp3   | 0 | 0 | 0 | 0 | 1 | 0 | 0 | 0 | 1 | 1 | 1 |
| Frk     | 0 | 0 | 0 | 0 | 0 | 1 | 0 | 0 | 1 | 1 | 1 |
| Frmpd2  | 0 | 0 | 0 | 0 | 1 | 0 | 0 | 0 | 1 | 1 | 1 |
| Fsbp    | 0 | 0 | 0 | 0 | 1 | 0 | 0 | 0 | 1 | 1 | 1 |
| Fsd1    | 0 | 0 | 0 | 0 | 0 | 0 | 1 | 0 | 1 | 1 | 1 |
| Fstl4   | 0 | 0 | 0 | 0 | 1 | 0 | 0 | 0 | 1 | 1 | 1 |
| Ftsj3   | 0 | 0 | 0 | 0 | 1 | 0 | 0 | 0 | 1 | 1 | 1 |
| Fubp3   | 0 | 0 | 0 | 0 | 1 | 0 | 0 | 0 | 1 | 1 | 1 |
| Fuca1   | 0 | 0 | 0 | 0 | 1 | 0 | 0 | 0 | 1 | 1 | 1 |
| Fuk     | 0 | 0 | 0 | 0 | 1 | 0 | 0 | 0 | 1 | 1 | 1 |
| Furin   | 0 | 0 | 0 | 0 | 1 | 0 | 0 | 0 | 1 | 1 | 1 |
| Fus     | 0 | 0 | 0 | 0 | 1 | 0 | 0 | 0 | 1 | 1 | 1 |
| Fxyd1   | 0 | 0 | 0 | 0 | 1 | 0 | 0 | 0 | 1 | 1 | 1 |
| Fyb2    | 0 | 0 | 0 | 0 | 0 | 0 | 1 | 0 | 1 | 1 | 1 |
| Fyn     | 0 | 0 | 0 | 0 | 1 | 0 | 0 | 0 | 1 | 1 | 1 |
| Fzd10   | 0 | 0 | 0 | 0 | 1 | 0 | 0 | 0 | 1 | 1 | 1 |
| G2e3    | 0 | 0 | 0 | 0 | 1 | 0 | 0 | 0 | 1 | 1 | 1 |

|           |   |   |   |   |   |   |   |   |   |   |   |
|-----------|---|---|---|---|---|---|---|---|---|---|---|
| Gab1      | 0 | 0 | 0 | 0 | 1 | 0 | 0 | 0 | 1 | 1 | 1 |
| Gabbr2    | 0 | 0 | 0 | 0 | 1 | 0 | 0 | 0 | 1 | 1 | 1 |
| Gabrb1    | 0 | 0 | 0 | 0 | 1 | 0 | 0 | 0 | 1 | 1 | 1 |
| Gabrg3    | 0 | 0 | 0 | 0 | 0 | 1 | 0 | 0 | 1 | 1 | 1 |
| Gabrq     | 0 | 0 | 0 | 0 | 1 | 0 | 0 | 0 | 1 | 1 | 1 |
| Gabbr1    | 0 | 0 | 0 | 0 | 1 | 0 | 0 | 0 | 1 | 1 | 1 |
| Gabbr2    | 0 | 0 | 0 | 0 | 1 | 0 | 0 | 0 | 1 | 1 | 1 |
| Gadd45gip | 0 | 0 | 0 | 0 | 1 | 0 | 0 | 0 | 1 | 1 | 1 |
| Gadl1     | 0 | 0 | 0 | 0 | 1 | 0 | 0 | 0 | 1 | 1 | 1 |
| Gak       | 0 | 0 | 0 | 0 | 1 | 0 | 0 | 0 | 1 | 1 | 1 |
| Galnt1    | 0 | 0 | 0 | 0 | 1 | 0 | 0 | 0 | 1 | 1 | 1 |
| Gamt      | 0 | 0 | 0 | 0 | 1 | 0 | 0 | 0 | 1 | 1 | 1 |
| Ganab     | 0 | 0 | 0 | 0 | 1 | 0 | 0 | 0 | 1 | 1 | 1 |
| Ganc      | 0 | 0 | 0 | 0 | 1 | 0 | 0 | 0 | 1 | 1 | 1 |
| Garnl3    | 0 | 0 | 0 | 0 | 1 | 0 | 0 | 0 | 1 | 1 | 1 |
| Gatad2a   | 0 | 0 | 0 | 0 | 1 | 0 | 0 | 0 | 1 | 1 | 1 |
| Gbf1      | 0 | 0 | 0 | 0 | 1 | 0 | 0 | 0 | 1 | 1 | 1 |
| Gbp11     | 0 | 0 | 0 | 0 | 1 | 0 | 0 | 0 | 1 | 1 | 1 |
| Gbp4      | 0 | 0 | 0 | 0 | 1 | 0 | 0 | 0 | 1 | 1 | 1 |
| Gbp7      | 0 | 0 | 0 | 0 | 1 | 0 | 0 | 0 | 1 | 1 | 1 |
| Gcm2      | 0 | 0 | 0 | 0 | 1 | 0 | 0 | 0 | 1 | 1 | 1 |
| Gcn1l1    | 0 | 0 | 0 | 0 | 1 | 0 | 0 | 0 | 1 | 1 | 1 |
| Gcnt1     | 0 | 0 | 0 | 0 | 1 | 0 | 0 | 0 | 1 | 1 | 1 |
| Gcnt3     | 0 | 0 | 0 | 0 | 1 | 0 | 0 | 0 | 1 | 1 | 1 |
| Gdap1     | 0 | 0 | 0 | 0 | 1 | 0 | 0 | 0 | 1 | 1 | 1 |
| Gdf7      | 0 | 0 | 0 | 0 | 1 | 0 | 0 | 0 | 1 | 1 | 1 |
| Gdi2      | 0 | 0 | 0 | 0 | 1 | 0 | 0 | 0 | 1 | 1 | 1 |
| Gfap      | 0 | 0 | 0 | 0 | 1 | 0 | 0 | 0 | 1 | 1 | 1 |
| Gfi1      | 0 | 0 | 0 | 0 | 1 | 0 | 0 | 0 | 1 | 1 | 1 |
| Gfra3     | 0 | 0 | 0 | 0 | 1 | 0 | 0 | 0 | 1 | 1 | 1 |
| Gga1      | 0 | 0 | 0 | 0 | 1 | 0 | 0 | 0 | 1 | 1 | 1 |
| Gga3      | 0 | 0 | 0 | 0 | 1 | 0 | 0 | 0 | 1 | 1 | 1 |
| Ggcx      | 0 | 0 | 0 | 0 | 1 | 0 | 0 | 0 | 1 | 1 | 1 |



|         |   |   |   |   |   |   |   |   |   |   |   |
|---------|---|---|---|---|---|---|---|---|---|---|---|
| Ggt6    | 0 | 0 | 0 | 0 | 1 | 0 | 0 | 0 | 1 | 1 | 1 |
| Ggt7    | 0 | 0 | 0 | 0 | 1 | 0 | 0 | 0 | 1 | 1 | 1 |
| Gimap3  | 0 | 0 | 0 | 0 | 1 | 0 | 0 | 0 | 1 | 1 | 1 |
| Gins2   | 0 | 0 | 0 | 0 | 0 | 1 | 0 | 0 | 1 | 1 | 1 |
| Gja8    | 0 | 0 | 0 | 0 | 1 | 0 | 0 | 0 | 1 | 1 | 1 |
| Gjb1    | 0 | 0 | 0 | 0 | 1 | 0 | 0 | 0 | 1 | 1 | 1 |
| Gk      | 0 | 0 | 0 | 0 | 1 | 0 | 0 | 0 | 1 | 1 | 1 |
| Glce    | 0 | 0 | 0 | 0 | 1 | 0 | 0 | 0 | 1 | 1 | 1 |
| Gldc    | 0 | 0 | 0 | 0 | 1 | 0 | 0 | 0 | 1 | 1 | 1 |
| Gli3    | 0 | 0 | 0 | 0 | 1 | 0 | 0 | 0 | 1 | 1 | 1 |
| Glis3   | 0 | 0 | 0 | 0 | 1 | 0 | 0 | 0 | 1 | 1 | 1 |
| Glmn    | 0 | 0 | 0 | 0 | 1 | 0 | 0 | 0 | 1 | 1 | 1 |
| Glr2    | 0 | 0 | 0 | 0 | 1 | 0 | 0 | 0 | 1 | 1 | 1 |
| Glt8d1  | 0 | 0 | 0 | 0 | 1 | 0 | 0 | 0 | 1 | 1 | 1 |
| Glyr1   | 0 | 0 | 0 | 0 | 1 | 0 | 0 | 0 | 1 | 1 | 1 |
| Gm10277 | 0 | 0 | 0 | 0 | 1 | 0 | 0 | 0 | 1 | 1 | 1 |
| Gm10354 | 0 | 0 | 0 | 0 | 1 | 0 | 0 | 0 | 1 | 1 | 1 |
| Gm10424 | 0 | 0 | 0 | 0 | 1 | 0 | 0 | 0 | 1 | 1 | 1 |
| Gm10471 | 0 | 0 | 0 | 0 | 1 | 0 | 0 | 0 | 1 | 1 | 1 |
| Gm10961 | 0 | 0 | 0 | 0 | 1 | 0 | 0 | 0 | 1 | 1 | 1 |
| Gm11596 | 0 | 0 | 0 | 0 | 1 | 0 | 0 | 0 | 1 | 1 | 1 |
| Gm11639 | 0 | 0 | 0 | 0 | 1 | 0 | 0 | 0 | 1 | 1 | 1 |
| Gm12185 | 0 | 0 | 0 | 0 | 1 | 0 | 0 | 0 | 1 | 1 | 1 |
| Gm12355 | 0 | 0 | 0 | 0 | 1 | 0 | 0 | 0 | 1 | 1 | 1 |
| Gm12800 | 0 | 0 | 0 | 0 | 1 | 0 | 0 | 0 | 1 | 1 | 1 |
| Gm13078 | 1 | 0 | 0 | 0 | 0 | 0 | 0 | 0 | 1 | 1 | 1 |
| Gm13088 | 0 | 0 | 0 | 0 | 1 | 0 | 0 | 0 | 1 | 1 | 1 |
| Gm13757 | 1 | 0 | 0 | 0 | 0 | 0 | 0 | 0 | 1 | 1 | 1 |
| Gm14496 | 0 | 0 | 0 | 0 | 1 | 0 | 0 | 0 | 1 | 1 | 1 |
| Gm14698 | 0 | 0 | 0 | 0 | 1 | 0 | 0 | 0 | 1 | 1 | 1 |
| Gm1527  | 0 | 0 | 0 | 0 | 1 | 0 | 0 | 0 | 1 | 1 | 1 |
| Gm15293 | 0 | 0 | 0 | 0 | 1 | 0 | 0 | 0 | 1 | 1 | 1 |
| Gm20498 | 0 | 0 | 0 | 0 | 1 | 0 | 0 | 0 | 1 | 1 | 1 |

|         |   |   |   |   |   |   |   |   |   |   |   |
|---------|---|---|---|---|---|---|---|---|---|---|---|
| Gm20721 | 0 | 0 | 0 | 0 | 1 | 0 | 0 | 0 | 1 | 1 | 1 |
| Gm2a    | 0 | 0 | 0 | 0 | 1 | 0 | 0 | 0 | 1 | 1 | 1 |
| Gm43302 | 0 | 0 | 0 | 0 | 1 | 0 | 0 | 0 | 1 | 1 | 1 |
| Gm4841  | 0 | 0 | 0 | 0 | 1 | 0 | 0 | 0 | 1 | 1 | 1 |
| Gm4884  | 0 | 0 | 0 | 0 | 1 | 0 | 0 | 0 | 1 | 1 | 1 |
| Gm4981  | 0 | 0 | 0 | 0 | 1 | 0 | 0 | 0 | 1 | 1 | 1 |
| Gm5096  | 0 | 0 | 0 | 0 | 1 | 0 | 0 | 0 | 1 | 1 | 1 |
| Gm527   | 0 | 0 | 0 | 0 | 1 | 0 | 0 | 0 | 1 | 1 | 1 |
| Gm5415  | 0 | 0 | 0 | 0 | 0 | 1 | 0 | 0 | 1 | 1 | 1 |
| Gm5592  | 0 | 0 | 0 | 0 | 1 | 0 | 0 | 0 | 1 | 1 | 1 |
| Gm5640  | 0 | 0 | 0 | 0 | 1 | 0 | 0 | 0 | 1 | 1 | 1 |
| Gm7324  | 0 | 0 | 0 | 0 | 1 | 0 | 0 | 0 | 1 | 1 | 1 |
| Gm7579  | 0 | 0 | 0 | 0 | 1 | 0 | 0 | 0 | 1 | 1 | 1 |
| Gm884   | 0 | 0 | 0 | 0 | 1 | 0 | 0 | 0 | 1 | 1 | 1 |
| Gm8994  | 0 | 0 | 0 | 0 | 1 | 0 | 0 | 0 | 1 | 1 | 1 |
| Gm973   | 0 | 0 | 0 | 0 | 1 | 0 | 0 | 0 | 1 | 1 | 1 |
| Gm9745  | 0 | 0 | 0 | 0 | 1 | 0 | 0 | 0 | 1 | 1 | 1 |
| Gm996   | 0 | 0 | 0 | 0 | 1 | 0 | 0 | 0 | 1 | 1 | 1 |
| Gmppb   | 0 | 0 | 0 | 0 | 1 | 0 | 0 | 0 | 1 | 1 | 1 |
| Gna12   | 0 | 0 | 0 | 0 | 1 | 0 | 0 | 0 | 1 | 1 | 1 |
| Gnai2   | 0 | 0 | 0 | 0 | 1 | 0 | 0 | 0 | 1 | 1 | 1 |
| Gnb4    | 0 | 0 | 0 | 0 | 1 | 0 | 0 | 0 | 1 | 1 | 1 |
| Gnpat   | 0 | 0 | 0 | 0 | 1 | 0 | 0 | 0 | 1 | 1 | 1 |
| Gnptg   | 0 | 0 | 0 | 0 | 1 | 0 | 0 | 0 | 1 | 1 | 1 |
| Golga1  | 0 | 0 | 0 | 0 | 1 | 0 | 0 | 0 | 1 | 1 | 1 |
| Golga3  | 0 | 0 | 0 | 0 | 1 | 0 | 0 | 0 | 1 | 1 | 1 |
| Golga4  | 0 | 0 | 0 | 0 | 1 | 0 | 0 | 0 | 1 | 1 | 1 |
| Gon4l   | 0 | 0 | 0 | 0 | 1 | 0 | 0 | 0 | 1 | 1 | 1 |
| Got2    | 0 | 0 | 0 | 0 | 1 | 0 | 0 | 0 | 1 | 1 | 1 |
| Gpaa1   | 0 | 0 | 0 | 0 | 1 | 0 | 0 | 0 | 1 | 1 | 1 |
| Gpat2   | 0 | 0 | 0 | 0 | 1 | 0 | 0 | 0 | 1 | 1 | 1 |
| Gpat3   | 0 | 0 | 0 | 0 | 1 | 0 | 0 | 0 | 1 | 1 | 1 |
| Gpatch1 | 0 | 0 | 0 | 0 | 1 | 0 | 0 | 0 | 1 | 1 | 1 |

|          |   |   |   |   |   |   |   |   |   |   |   |
|----------|---|---|---|---|---|---|---|---|---|---|---|
| Gpatch4  | 0 | 0 | 0 | 0 | 1 | 0 | 0 | 0 | 1 | 1 | 1 |
| Gpatch8  | 0 | 0 | 0 | 0 | 1 | 0 | 0 | 0 | 1 | 1 | 1 |
| Gpc2     | 0 | 0 | 0 | 0 | 1 | 0 | 0 | 0 | 1 | 1 | 1 |
| Gpd2     | 0 | 0 | 0 | 0 | 1 | 0 | 0 | 0 | 1 | 1 | 1 |
| Gpld1    | 0 | 0 | 0 | 0 | 1 | 0 | 0 | 0 | 1 | 1 | 1 |
| Gpr139   | 0 | 0 | 0 | 0 | 0 | 1 | 0 | 0 | 1 | 1 | 1 |
| Gpr161   | 0 | 0 | 0 | 0 | 1 | 0 | 0 | 0 | 1 | 1 | 1 |
| Gpr182   | 0 | 0 | 0 | 0 | 1 | 0 | 0 | 0 | 1 | 1 | 1 |
| Gpr68    | 0 | 0 | 0 | 0 | 1 | 0 | 0 | 0 | 1 | 1 | 1 |
| Gpr82    | 0 | 0 | 0 | 0 | 1 | 0 | 0 | 0 | 1 | 1 | 1 |
| Gprasp1  | 0 | 0 | 0 | 0 | 1 | 0 | 0 | 0 | 1 | 1 | 1 |
| Gprin1   | 0 | 0 | 0 | 0 | 1 | 0 | 0 | 0 | 1 | 1 | 1 |
| Gpt2     | 0 | 0 | 0 | 0 | 1 | 0 | 0 | 0 | 1 | 1 | 1 |
| Gramd3   | 0 | 0 | 0 | 0 | 0 | 1 | 0 | 0 | 1 | 1 | 1 |
| Grik2    | 0 | 0 | 0 | 0 | 1 | 0 | 0 | 0 | 1 | 1 | 1 |
| Grik5    | 0 | 0 | 0 | 0 | 1 | 0 | 0 | 0 | 1 | 1 | 1 |
| Grin2c   | 0 | 0 | 0 | 0 | 1 | 0 | 0 | 0 | 1 | 1 | 1 |
| Grin2d   | 0 | 0 | 0 | 0 | 0 | 1 | 0 | 0 | 1 | 1 | 1 |
| Grin3a   | 0 | 0 | 0 | 0 | 0 | 0 | 1 | 0 | 1 | 1 | 1 |
| Grm5     | 0 | 0 | 0 | 0 | 1 | 0 | 0 | 0 | 1 | 1 | 1 |
| Grm7     | 0 | 0 | 0 | 0 | 1 | 0 | 0 | 0 | 1 | 1 | 1 |
| Grp      | 0 | 0 | 0 | 0 | 0 | 0 | 1 | 0 | 1 | 1 | 1 |
| Gsdma    | 0 | 0 | 0 | 0 | 1 | 0 | 0 | 0 | 1 | 1 | 1 |
| Gsk3a    | 0 | 0 | 0 | 0 | 1 | 0 | 0 | 0 | 1 | 1 | 1 |
| Gsk3b    | 0 | 0 | 0 | 0 | 1 | 0 | 0 | 0 | 1 | 1 | 1 |
| Gspt1    | 0 | 0 | 0 | 0 | 1 | 0 | 0 | 0 | 1 | 1 | 1 |
| Gsr      | 0 | 0 | 0 | 0 | 1 | 0 | 0 | 0 | 1 | 1 | 1 |
| Gstm1    | 0 | 0 | 0 | 0 | 1 | 0 | 0 | 0 | 1 | 1 | 1 |
| Gstm3    | 0 | 0 | 0 | 0 | 1 | 0 | 0 | 0 | 1 | 1 | 1 |
| Gstm7    | 0 | 0 | 0 | 0 | 1 | 0 | 0 | 0 | 1 | 1 | 1 |
| Gtf2ird2 | 0 | 0 | 0 | 0 | 1 | 0 | 0 | 0 | 1 | 1 | 1 |
| Gtf3c2   | 0 | 0 | 0 | 0 | 1 | 0 | 0 | 0 | 1 | 1 | 1 |
| Gucy1a1  | 0 | 0 | 0 | 0 | 1 | 0 | 0 | 0 | 1 | 1 | 1 |

|          |   |   |   |   |   |   |   |   |   |   |   |
|----------|---|---|---|---|---|---|---|---|---|---|---|
| Gucy1b2  | 0 | 0 | 0 | 0 | 1 | 0 | 0 | 0 | 1 | 1 | 1 |
| Gucy2d   | 0 | 0 | 0 | 0 | 1 | 0 | 0 | 0 | 1 | 1 | 1 |
| Gucy2f   | 0 | 0 | 0 | 0 | 1 | 0 | 0 | 0 | 1 | 1 | 1 |
| Gykl1    | 0 | 0 | 0 | 0 | 1 | 0 | 0 | 0 | 1 | 1 | 1 |
| H2-Aa    | 0 | 0 | 0 | 0 | 1 | 0 | 0 | 0 | 1 | 1 | 1 |
| H2-K1    | 0 | 0 | 0 | 0 | 1 | 0 | 0 | 0 | 1 | 1 | 1 |
| H2-M10.4 | 0 | 0 | 0 | 0 | 1 | 0 | 0 | 0 | 1 | 1 | 1 |
| H2-M2    | 0 | 0 | 0 | 0 | 1 | 0 | 0 | 0 | 1 | 1 | 1 |
| H2-Ob    | 0 | 0 | 0 | 0 | 1 | 0 | 0 | 0 | 1 | 1 | 1 |
| H2-T10   | 0 | 0 | 0 | 0 | 1 | 0 | 0 | 0 | 1 | 1 | 1 |
| Hace1    | 0 | 0 | 0 | 0 | 1 | 0 | 0 | 0 | 1 | 1 | 1 |
| Hap1     | 0 | 0 | 0 | 0 | 1 | 0 | 0 | 0 | 1 | 1 | 1 |
| Has3     | 0 | 0 | 0 | 0 | 0 | 1 | 0 | 0 | 1 | 1 | 1 |
| Hbs1l    | 0 | 0 | 0 | 0 | 1 | 0 | 0 | 0 | 1 | 1 | 1 |
| Hctr2    | 0 | 0 | 0 | 0 | 0 | 1 | 0 | 0 | 1 | 1 | 1 |
| Hdac11   | 0 | 0 | 0 | 0 | 0 | 0 | 1 | 0 | 1 | 1 | 1 |
| Hdac4    | 0 | 0 | 0 | 0 | 1 | 0 | 0 | 0 | 1 | 1 | 1 |
| Hdac9    | 0 | 0 | 0 | 0 | 1 | 0 | 0 | 0 | 1 | 1 | 1 |
| Hdc      | 0 | 0 | 0 | 0 | 1 | 0 | 0 | 0 | 1 | 1 | 1 |
| Hdgf     | 0 | 0 | 0 | 0 | 1 | 0 | 0 | 0 | 1 | 1 | 1 |
| Hdgl2    | 0 | 0 | 0 | 0 | 1 | 0 | 0 | 0 | 1 | 1 | 1 |
| Hdlbp    | 0 | 0 | 0 | 0 | 1 | 0 | 0 | 0 | 1 | 1 | 1 |
| Heatr5a  | 0 | 0 | 0 | 0 | 1 | 0 | 0 | 0 | 1 | 1 | 1 |
| Heatr5b  | 0 | 0 | 0 | 0 | 1 | 0 | 0 | 0 | 1 | 1 | 1 |
| Heatr6   | 0 | 0 | 0 | 0 | 0 | 1 | 0 | 0 | 1 | 1 | 1 |
| Hectd1   | 0 | 0 | 0 | 0 | 0 | 0 | 1 | 0 | 1 | 1 | 1 |
| Hectd2   | 0 | 0 | 0 | 0 | 1 | 0 | 0 | 0 | 1 | 1 | 1 |
| Hectd4   | 0 | 0 | 0 | 0 | 1 | 0 | 0 | 0 | 1 | 1 | 1 |
| Hecw2    | 0 | 0 | 0 | 0 | 1 | 0 | 0 | 0 | 1 | 1 | 1 |
| Heg1     | 0 | 0 | 0 | 0 | 1 | 0 | 0 | 0 | 1 | 1 | 1 |
| Herc2    | 0 | 0 | 0 | 0 | 1 | 0 | 0 | 0 | 1 | 1 | 1 |
| Herc3    | 0 | 0 | 0 | 0 | 0 | 0 | 1 | 0 | 1 | 1 | 1 |
| Hes6     | 0 | 0 | 0 | 0 | 1 | 0 | 0 | 0 | 1 | 1 | 1 |

|          |   |   |   |   |   |   |   |   |   |   |   |
|----------|---|---|---|---|---|---|---|---|---|---|---|
| Hexim2   | 0 | 0 | 0 | 0 | 1 | 0 | 0 | 0 | 1 | 1 | 1 |
| Hfm1     | 0 | 0 | 0 | 0 | 1 | 0 | 0 | 0 | 1 | 1 | 1 |
| Hgf      | 0 | 0 | 0 | 0 | 0 | 0 | 1 | 0 | 1 | 1 | 1 |
| Hhat     | 0 | 0 | 0 | 0 | 1 | 0 | 0 | 0 | 1 | 1 | 1 |
| Hhip1    | 0 | 0 | 0 | 0 | 1 | 0 | 0 | 0 | 1 | 1 | 1 |
| Hibch    | 0 | 0 | 0 | 0 | 1 | 0 | 0 | 0 | 1 | 1 | 1 |
| Hic2     | 0 | 0 | 0 | 0 | 1 | 0 | 0 | 0 | 1 | 1 | 1 |
| Hipk2    | 0 | 0 | 0 | 0 | 0 | 1 | 0 | 0 | 1 | 1 | 1 |
| Hirip3   | 0 | 0 | 0 | 0 | 1 | 0 | 0 | 0 | 1 | 1 | 1 |
| Hist1h4n | 0 | 0 | 0 | 0 | 1 | 0 | 0 | 0 | 1 | 1 | 1 |
| Hivep3   | 0 | 0 | 0 | 0 | 1 | 0 | 0 | 0 | 1 | 1 | 1 |
| Hjurp    | 0 | 0 | 0 | 0 | 1 | 0 | 0 | 0 | 1 | 1 | 1 |
| Hkdc1    | 0 | 0 | 0 | 0 | 1 | 0 | 0 | 0 | 1 | 1 | 1 |
| Hlx      | 0 | 0 | 0 | 0 | 1 | 0 | 0 | 0 | 1 | 1 | 1 |
| Hmbox1   | 0 | 0 | 0 | 0 | 1 | 0 | 0 | 0 | 1 | 1 | 1 |
| Hmgcs2   | 0 | 0 | 0 | 0 | 1 | 0 | 0 | 0 | 1 | 1 | 1 |
| Hnf1b    | 0 | 0 | 0 | 0 | 1 | 0 | 0 | 0 | 1 | 1 | 1 |
| Hnrnpm   | 0 | 0 | 0 | 0 | 1 | 0 | 0 | 0 | 1 | 1 | 1 |
| Homer1   | 0 | 0 | 0 | 0 | 1 | 0 | 0 | 0 | 1 | 1 | 1 |
| Hoxa11   | 0 | 0 | 0 | 0 | 1 | 0 | 0 | 0 | 1 | 1 | 1 |
| Hoxd3    | 0 | 0 | 0 | 0 | 1 | 0 | 0 | 0 | 1 | 1 | 1 |
| Hp       | 0 | 0 | 0 | 0 | 1 | 0 | 0 | 0 | 1 | 1 | 1 |
| Hpd1     | 0 | 0 | 0 | 0 | 0 | 1 | 0 | 0 | 1 | 1 | 1 |
| Hprt     | 0 | 0 | 0 | 0 | 1 | 0 | 0 | 0 | 1 | 1 | 1 |
| Hpse2    | 0 | 0 | 0 | 0 | 1 | 0 | 0 | 0 | 1 | 1 | 1 |
| Hpx      | 0 | 0 | 0 | 0 | 1 | 0 | 0 | 0 | 1 | 1 | 1 |
| Hrg      | 0 | 0 | 0 | 0 | 1 | 0 | 0 | 0 | 1 | 1 | 1 |
| Hs6st2   | 0 | 0 | 0 | 0 | 1 | 0 | 0 | 0 | 1 | 1 | 1 |
| Hsd17b3  | 0 | 0 | 0 | 0 | 0 | 1 | 0 | 0 | 1 | 1 | 1 |
| Hsp90aa1 | 0 | 0 | 0 | 0 | 1 | 0 | 0 | 0 | 1 | 1 | 1 |
| Hspa5    | 0 | 0 | 0 | 0 | 1 | 0 | 0 | 0 | 1 | 1 | 1 |
| Hspa8    | 0 | 0 | 0 | 0 | 1 | 0 | 0 | 0 | 1 | 1 | 1 |
| Htatsf1  | 0 | 0 | 0 | 0 | 0 | 1 | 0 | 0 | 1 | 1 | 1 |

|            |   |   |   |   |   |   |   |   |   |   |   |
|------------|---|---|---|---|---|---|---|---|---|---|---|
| Huwe1      | 0 | 0 | 0 | 0 | 1 | 0 | 0 | 0 | 1 | 1 | 1 |
| Hyou1      | 0 | 0 | 0 | 0 | 1 | 0 | 0 | 0 | 1 | 1 | 1 |
| I830077J0: | 0 | 0 | 0 | 0 | 1 | 0 | 0 | 0 | 1 | 1 | 1 |
| Iars2      | 0 | 0 | 0 | 0 | 1 | 0 | 0 | 0 | 1 | 1 | 1 |
| Icam2      | 0 | 0 | 0 | 0 | 1 | 0 | 0 | 0 | 1 | 1 | 1 |
| Icnk       | 0 | 0 | 0 | 0 | 1 | 0 | 0 | 0 | 1 | 1 | 1 |
| Ico2       | 0 | 0 | 0 | 0 | 1 | 0 | 0 | 0 | 1 | 1 | 1 |
| Ifo204     | 0 | 0 | 0 | 0 | 1 | 0 | 0 | 0 | 1 | 1 | 1 |
| Ifoh1      | 0 | 0 | 0 | 0 | 1 | 0 | 0 | 0 | 1 | 1 | 1 |
| Ifngr1     | 0 | 0 | 0 | 0 | 1 | 0 | 0 | 0 | 1 | 1 | 1 |
| Ift172     | 0 | 0 | 0 | 0 | 0 | 1 | 0 | 0 | 1 | 1 | 1 |
| Ift80      | 0 | 0 | 0 | 0 | 0 | 0 | 1 | 0 | 1 | 1 | 1 |
| Igbp1b     | 0 | 0 | 0 | 0 | 1 | 0 | 0 | 0 | 1 | 1 | 1 |
| Ighv1-5    | 0 | 0 | 0 | 0 | 1 | 0 | 0 | 0 | 1 | 1 | 1 |
| Ighv1-54   | 0 | 0 | 0 | 0 | 1 | 0 | 0 | 0 | 1 | 1 | 1 |
| Ighv1-82   | 0 | 0 | 0 | 0 | 1 | 0 | 0 | 0 | 1 | 1 | 1 |
| Ighv5-17   | 0 | 0 | 0 | 0 | 0 | 1 | 0 | 0 | 1 | 1 | 1 |
| Ighv8-6    | 0 | 0 | 0 | 0 | 1 | 0 | 0 | 0 | 1 | 1 | 1 |
| Igkv1-133  | 0 | 0 | 0 | 0 | 1 | 0 | 0 | 0 | 1 | 1 | 1 |
| Igkv3-2    | 0 | 0 | 0 | 0 | 1 | 0 | 0 | 0 | 1 | 1 | 1 |
| Igkv4-53   | 0 | 0 | 0 | 0 | 1 | 0 | 0 | 0 | 1 | 1 | 1 |
| Igkv4-58   | 0 | 0 | 0 | 0 | 1 | 0 | 0 | 0 | 1 | 1 | 1 |
| Igkv8-28   | 0 | 0 | 0 | 0 | 1 | 0 | 0 | 0 | 1 | 1 | 1 |
| Igsf8      | 0 | 0 | 0 | 0 | 1 | 0 | 0 | 0 | 1 | 1 | 1 |
| Ikbkg      | 0 | 0 | 0 | 0 | 1 | 0 | 0 | 0 | 1 | 1 | 1 |
| Ii10ra     | 0 | 0 | 0 | 0 | 1 | 0 | 0 | 0 | 1 | 1 | 1 |
| Ii13ra1    | 0 | 0 | 0 | 0 | 0 | 1 | 0 | 0 | 1 | 1 | 1 |
| Ii17ra     | 0 | 0 | 0 | 0 | 0 | 1 | 0 | 0 | 1 | 1 | 1 |
| Ii1rap1    | 0 | 0 | 0 | 0 | 1 | 0 | 0 | 0 | 1 | 1 | 1 |
| Ii20       | 0 | 0 | 0 | 0 | 1 | 0 | 0 | 0 | 1 | 1 | 1 |
| Ii22ra1    | 0 | 0 | 0 | 0 | 1 | 0 | 0 | 0 | 1 | 1 | 1 |
| Ii3ra      | 0 | 0 | 0 | 0 | 1 | 0 | 0 | 0 | 1 | 1 | 1 |
| Iik        | 0 | 0 | 0 | 0 | 1 | 0 | 0 | 0 | 1 | 1 | 1 |

|         |   |   |   |   |   |   |   |   |   |   |   |
|---------|---|---|---|---|---|---|---|---|---|---|---|
| Imp4    | 0 | 0 | 0 | 0 | 1 | 0 | 0 | 0 | 1 | 1 | 1 |
| Ing2    | 0 | 0 | 0 | 0 | 1 | 0 | 0 | 0 | 1 | 1 | 1 |
| Inhba   | 0 | 0 | 0 | 0 | 1 | 0 | 0 | 0 | 1 | 1 | 1 |
| Inhbb   | 0 | 0 | 0 | 0 | 1 | 0 | 0 | 0 | 1 | 1 | 1 |
| Inhbc   | 0 | 0 | 0 | 0 | 1 | 0 | 0 | 0 | 1 | 1 | 1 |
| Ino80d  | 0 | 0 | 0 | 0 | 0 | 1 | 0 | 0 | 1 | 1 | 1 |
| Inpp1   | 0 | 0 | 0 | 0 | 1 | 0 | 0 | 0 | 1 | 1 | 1 |
| Insr    | 0 | 0 | 0 | 0 | 1 | 0 | 0 | 0 | 1 | 1 | 1 |
| Insr    | 0 | 0 | 0 | 0 | 0 | 0 | 1 | 0 | 1 | 1 | 1 |
| Ints11  | 0 | 0 | 0 | 0 | 1 | 0 | 0 | 0 | 1 | 1 | 1 |
| Ints12  | 0 | 0 | 0 | 0 | 1 | 0 | 0 | 0 | 1 | 1 | 1 |
| Ints2   | 0 | 0 | 0 | 0 | 1 | 0 | 0 | 0 | 1 | 1 | 1 |
| Ints7   | 0 | 0 | 0 | 0 | 1 | 0 | 0 | 0 | 1 | 1 | 1 |
| lpo13   | 0 | 0 | 0 | 0 | 1 | 0 | 0 | 0 | 1 | 1 | 1 |
| lpo7    | 0 | 0 | 0 | 0 | 0 | 1 | 0 | 0 | 1 | 1 | 1 |
| lppk    | 0 | 0 | 0 | 0 | 1 | 0 | 0 | 0 | 1 | 1 | 1 |
| lqck    | 0 | 0 | 0 | 0 | 1 | 0 | 0 | 0 | 1 | 1 | 1 |
| lrak4   | 0 | 0 | 0 | 0 | 1 | 0 | 0 | 0 | 1 | 1 | 1 |
| lrf2bp1 | 0 | 0 | 0 | 0 | 1 | 0 | 0 | 0 | 1 | 1 | 1 |
| lrgm1   | 0 | 0 | 0 | 0 | 1 | 0 | 0 | 0 | 1 | 1 | 1 |
| lrs2    | 0 | 0 | 0 | 0 | 1 | 0 | 0 | 0 | 1 | 1 | 1 |
| lrs3    | 0 | 0 | 0 | 0 | 1 | 0 | 0 | 0 | 1 | 1 | 1 |
| lrx6    | 0 | 0 | 0 | 0 | 1 | 0 | 0 | 0 | 1 | 1 | 1 |
| lst1    | 0 | 0 | 0 | 0 | 1 | 0 | 0 | 0 | 1 | 1 | 1 |
| lsyna1  | 0 | 0 | 0 | 0 | 1 | 0 | 0 | 0 | 1 | 1 | 1 |
| ltga2b  | 0 | 0 | 0 | 0 | 1 | 0 | 0 | 0 | 1 | 1 | 1 |
| ltga3   | 0 | 0 | 0 | 0 | 1 | 0 | 0 | 0 | 1 | 1 | 1 |
| ltga5   | 0 | 0 | 0 | 0 | 1 | 0 | 0 | 0 | 1 | 1 | 1 |
| ltgad   | 0 | 0 | 0 | 0 | 1 | 0 | 0 | 0 | 1 | 1 | 1 |
| ltgb1   | 0 | 0 | 0 | 0 | 1 | 0 | 0 | 0 | 1 | 1 | 1 |
| ltgb4   | 0 | 0 | 0 | 0 | 0 | 0 | 1 | 0 | 1 | 1 | 1 |
| ltgb7   | 0 | 0 | 0 | 0 | 1 | 0 | 0 | 0 | 1 | 1 | 1 |
| ltih4   | 0 | 0 | 0 | 0 | 1 | 0 | 0 | 0 | 1 | 1 | 1 |

|           |   |   |   |   |   |   |   |   |   |   |   |
|-----------|---|---|---|---|---|---|---|---|---|---|---|
| Itih5     | 0 | 0 | 0 | 0 | 1 | 0 | 0 | 0 | 1 | 1 | 1 |
| Itpkb     | 0 | 0 | 0 | 0 | 1 | 0 | 0 | 0 | 1 | 1 | 1 |
| Itpr2     | 0 | 0 | 0 | 0 | 1 | 0 | 0 | 0 | 1 | 1 | 1 |
| Itpripl2  | 0 | 0 | 0 | 0 | 1 | 0 | 0 | 0 | 1 | 1 | 1 |
| Its1      | 0 | 0 | 0 | 0 | 1 | 0 | 0 | 0 | 1 | 1 | 1 |
| Its2      | 0 | 0 | 0 | 0 | 0 | 1 | 0 | 0 | 1 | 1 | 1 |
| Ivns1abp  | 0 | 0 | 0 | 0 | 1 | 0 | 0 | 0 | 1 | 1 | 1 |
| Jak3      | 0 | 0 | 0 | 0 | 1 | 0 | 0 | 0 | 1 | 1 | 1 |
| Jakmip3   | 0 | 0 | 0 | 0 | 1 | 0 | 0 | 0 | 1 | 1 | 1 |
| Jaml      | 0 | 0 | 0 | 0 | 1 | 0 | 0 | 0 | 1 | 1 | 1 |
| Jarid2    | 0 | 0 | 0 | 0 | 1 | 0 | 0 | 0 | 1 | 1 | 1 |
| Jcad      | 0 | 0 | 0 | 0 | 1 | 0 | 0 | 0 | 1 | 1 | 1 |
| Jhy       | 0 | 0 | 0 | 0 | 1 | 0 | 0 | 0 | 1 | 1 | 1 |
| K230010J2 | 0 | 0 | 0 | 0 | 1 | 0 | 0 | 0 | 1 | 1 | 1 |
| Kank2     | 0 | 0 | 0 | 0 | 1 | 0 | 0 | 0 | 1 | 1 | 1 |
| Kansl2    | 0 | 0 | 0 | 0 | 1 | 0 | 0 | 0 | 1 | 1 | 1 |
| Kat6a     | 0 | 0 | 0 | 0 | 1 | 0 | 0 | 0 | 1 | 1 | 1 |
| Kat6b     | 0 | 0 | 0 | 0 | 1 | 0 | 0 | 0 | 1 | 1 | 1 |
| Kazald1   | 0 | 0 | 0 | 0 | 1 | 0 | 0 | 0 | 1 | 1 | 1 |
| Kbtbd11   | 0 | 0 | 0 | 0 | 1 | 0 | 0 | 0 | 1 | 1 | 1 |
| Kbtbd4    | 0 | 0 | 0 | 0 | 1 | 0 | 0 | 0 | 1 | 1 | 1 |
| Kcmf1     | 0 | 0 | 0 | 0 | 1 | 0 | 0 | 0 | 1 | 1 | 1 |
| Kcna1     | 0 | 0 | 0 | 0 | 1 | 0 | 0 | 0 | 1 | 1 | 1 |
| Kcna3     | 0 | 0 | 0 | 0 | 1 | 0 | 0 | 0 | 1 | 1 | 1 |
| Kcnab1    | 1 | 0 | 0 | 0 | 0 | 0 | 0 | 0 | 1 | 1 | 1 |
| Kcnab2    | 0 | 0 | 0 | 0 | 1 | 0 | 0 | 0 | 1 | 1 | 1 |
| Kcnab3    | 0 | 0 | 0 | 0 | 1 | 0 | 0 | 0 | 1 | 1 | 1 |
| Kcnb1     | 0 | 0 | 0 | 0 | 1 | 0 | 0 | 0 | 1 | 1 | 1 |
| Kcnc3     | 0 | 0 | 0 | 0 | 1 | 0 | 0 | 0 | 1 | 1 | 1 |
| Kcne1l    | 0 | 0 | 0 | 0 | 1 | 0 | 0 | 0 | 1 | 1 | 1 |
| Kcng2     | 0 | 0 | 0 | 0 | 1 | 0 | 0 | 0 | 1 | 1 | 1 |
| Kcng4     | 0 | 0 | 0 | 0 | 1 | 0 | 0 | 0 | 1 | 1 | 1 |
| Kcnh3     | 0 | 0 | 0 | 0 | 0 | 0 | 1 | 0 | 1 | 1 | 1 |



|         |   |   |   |   |   |   |   |   |   |   |   |
|---------|---|---|---|---|---|---|---|---|---|---|---|
| Kcnh8   | 0 | 0 | 0 | 0 | 1 | 0 | 0 | 0 | 1 | 1 | 1 |
| Kcnj13  | 0 | 0 | 0 | 0 | 1 | 0 | 0 | 0 | 1 | 1 | 1 |
| Kcnk18  | 0 | 0 | 0 | 0 | 1 | 0 | 0 | 0 | 1 | 1 | 1 |
| Kcnk5   | 0 | 0 | 0 | 0 | 1 | 0 | 0 | 0 | 1 | 1 | 1 |
| Kcnmb1  | 0 | 0 | 0 | 0 | 1 | 0 | 0 | 0 | 1 | 1 | 1 |
| Kcnn1   | 0 | 0 | 0 | 0 | 1 | 0 | 0 | 0 | 1 | 1 | 1 |
| Kcnt2   | 0 | 0 | 0 | 0 | 1 | 0 | 0 | 0 | 1 | 1 | 1 |
| Kctd13  | 0 | 0 | 0 | 0 | 1 | 0 | 0 | 0 | 1 | 1 | 1 |
| Kctd3   | 0 | 0 | 0 | 0 | 1 | 0 | 0 | 0 | 1 | 1 | 1 |
| Kctd8   | 0 | 0 | 0 | 0 | 1 | 0 | 0 | 0 | 1 | 1 | 1 |
| Kdelr2  | 0 | 0 | 0 | 0 | 0 | 0 | 1 | 0 | 1 | 1 | 1 |
| Kdm3a   | 0 | 0 | 0 | 0 | 1 | 0 | 0 | 0 | 1 | 1 | 1 |
| Kdm3b   | 0 | 0 | 0 | 0 | 1 | 0 | 0 | 0 | 1 | 1 | 1 |
| Kdm4b   | 0 | 0 | 0 | 0 | 1 | 0 | 0 | 0 | 1 | 1 | 1 |
| Kdm6b   | 0 | 0 | 0 | 0 | 1 | 0 | 0 | 0 | 1 | 1 | 1 |
| Kdm7a   | 0 | 0 | 0 | 0 | 1 | 0 | 0 | 0 | 1 | 1 | 1 |
| Kdr     | 0 | 0 | 0 | 0 | 1 | 0 | 0 | 0 | 1 | 1 | 1 |
| Khk     | 0 | 0 | 0 | 0 | 1 | 0 | 0 | 0 | 1 | 1 | 1 |
| Kif19a  | 0 | 0 | 0 | 0 | 1 | 0 | 0 | 0 | 1 | 1 | 1 |
| Kif1b   | 0 | 0 | 0 | 0 | 1 | 0 | 0 | 0 | 1 | 1 | 1 |
| Kif20b  | 0 | 0 | 0 | 0 | 1 | 0 | 0 | 0 | 1 | 1 | 1 |
| Kif21a  | 0 | 0 | 0 | 0 | 0 | 0 | 1 | 0 | 1 | 1 | 1 |
| Kif22   | 0 | 0 | 0 | 0 | 0 | 0 | 1 | 0 | 1 | 1 | 1 |
| Kif26b  | 0 | 0 | 0 | 0 | 1 | 0 | 0 | 0 | 1 | 1 | 1 |
| Kif3c   | 0 | 0 | 0 | 0 | 0 | 1 | 0 | 0 | 1 | 1 | 1 |
| Kifap3  | 0 | 0 | 0 | 0 | 1 | 0 | 0 | 0 | 1 | 1 | 1 |
| Kifc5b  | 0 | 0 | 0 | 0 | 1 | 0 | 0 | 0 | 1 | 1 | 1 |
| Kir3dl1 | 0 | 0 | 0 | 0 | 1 | 0 | 0 | 0 | 1 | 1 | 1 |
| Kiz     | 0 | 0 | 0 | 0 | 1 | 0 | 0 | 0 | 1 | 1 | 1 |
| Klf3    | 0 | 0 | 0 | 0 | 1 | 0 | 0 | 0 | 1 | 1 | 1 |
| Klhl15  | 0 | 0 | 0 | 0 | 1 | 0 | 0 | 0 | 1 | 1 | 1 |
| Klhl3   | 0 | 0 | 0 | 0 | 0 | 0 | 1 | 0 | 1 | 1 | 1 |
| Klhl41  | 0 | 0 | 0 | 0 | 1 | 0 | 0 | 0 | 1 | 1 | 1 |

|         |   |   |   |   |   |   |   |   |   |   |   |
|---------|---|---|---|---|---|---|---|---|---|---|---|
| Klk1    | 0 | 0 | 0 | 0 | 1 | 0 | 0 | 0 | 1 | 1 | 1 |
| Klk1b11 | 0 | 0 | 0 | 0 | 1 | 0 | 0 | 0 | 1 | 1 | 1 |
| Klk1b24 | 0 | 0 | 0 | 0 | 1 | 0 | 0 | 0 | 1 | 1 | 1 |
| Klk1b8  | 0 | 0 | 0 | 0 | 1 | 0 | 0 | 0 | 1 | 1 | 1 |
| Klra5   | 0 | 0 | 0 | 0 | 1 | 0 | 0 | 0 | 1 | 1 | 1 |
| Klre1   | 0 | 0 | 0 | 0 | 0 | 0 | 1 | 0 | 1 | 1 | 1 |
| Kmo     | 0 | 0 | 0 | 0 | 0 | 0 | 1 | 0 | 1 | 1 | 1 |
| Kmt2a   | 0 | 0 | 0 | 0 | 0 | 1 | 0 | 0 | 1 | 1 | 1 |
| Kmt5b   | 0 | 0 | 0 | 0 | 0 | 0 | 1 | 0 | 1 | 1 | 1 |
| Kng2    | 0 | 0 | 0 | 0 | 1 | 0 | 0 | 0 | 1 | 1 | 1 |
| Kntc1   | 0 | 0 | 0 | 0 | 1 | 0 | 0 | 0 | 1 | 1 | 1 |
| Kpnb1   | 0 | 0 | 0 | 0 | 1 | 0 | 0 | 0 | 1 | 1 | 1 |
| Krit1   | 0 | 0 | 0 | 0 | 0 | 0 | 1 | 0 | 1 | 1 | 1 |
| Krt1    | 0 | 0 | 0 | 0 | 0 | 1 | 0 | 0 | 1 | 1 | 1 |
| Krt27   | 0 | 0 | 0 | 0 | 1 | 0 | 0 | 0 | 1 | 1 | 1 |
| Krt34   | 0 | 0 | 0 | 0 | 1 | 0 | 0 | 0 | 1 | 1 | 1 |
| Krt4    | 0 | 0 | 0 | 0 | 1 | 0 | 0 | 0 | 1 | 1 | 1 |
| Krt42   | 0 | 0 | 0 | 0 | 1 | 0 | 0 | 0 | 1 | 1 | 1 |
| Krt6b   | 0 | 0 | 0 | 0 | 0 | 0 | 1 | 0 | 1 | 1 | 1 |
| Krt72   | 0 | 0 | 0 | 0 | 1 | 0 | 0 | 0 | 1 | 1 | 1 |
| Krt78   | 0 | 0 | 0 | 0 | 1 | 0 | 0 | 0 | 1 | 1 | 1 |
| Krt84   | 0 | 0 | 0 | 0 | 1 | 0 | 0 | 0 | 1 | 1 | 1 |
| Krt86   | 0 | 0 | 0 | 0 | 1 | 0 | 0 | 0 | 1 | 1 | 1 |
| Krt88   | 0 | 0 | 0 | 0 | 1 | 0 | 0 | 0 | 1 | 1 | 1 |
| Ksr2    | 0 | 0 | 0 | 0 | 1 | 0 | 0 | 0 | 1 | 1 | 1 |
| Ktn1    | 0 | 0 | 0 | 0 | 1 | 0 | 0 | 0 | 1 | 1 | 1 |
| Ky      | 0 | 0 | 0 | 0 | 1 | 0 | 0 | 0 | 1 | 1 | 1 |
| L3hypdh | 0 | 0 | 0 | 0 | 1 | 0 | 0 | 0 | 1 | 1 | 1 |
| Lactb2  | 0 | 0 | 0 | 0 | 0 | 0 | 1 | 0 | 1 | 1 | 1 |
| Lamb1   | 0 | 0 | 0 | 0 | 1 | 0 | 0 | 0 | 1 | 1 | 1 |
| Lamb2   | 0 | 0 | 0 | 0 | 1 | 0 | 0 | 0 | 1 | 1 | 1 |
| Lamc1   | 0 | 0 | 0 | 0 | 1 | 0 | 0 | 0 | 1 | 1 | 1 |
| Large2  | 0 | 0 | 0 | 0 | 1 | 0 | 0 | 0 | 1 | 1 | 1 |

|         |   |   |   |   |   |   |   |   |   |   |   |
|---------|---|---|---|---|---|---|---|---|---|---|---|
| Lars    | 0 | 0 | 0 | 0 | 1 | 0 | 0 | 0 | 1 | 1 | 1 |
| Lats1   | 0 | 0 | 0 | 0 | 1 | 0 | 0 | 0 | 1 | 1 | 1 |
| Lcn5    | 0 | 0 | 0 | 0 | 1 | 0 | 0 | 0 | 1 | 1 | 1 |
| Lcor    | 0 | 0 | 0 | 0 | 1 | 0 | 0 | 0 | 1 | 1 | 1 |
| Lct     | 0 | 0 | 0 | 0 | 1 | 0 | 0 | 0 | 1 | 1 | 1 |
| Lgi1    | 0 | 0 | 0 | 0 | 1 | 0 | 0 | 0 | 1 | 1 | 1 |
| Lgi2    | 0 | 0 | 0 | 0 | 1 | 0 | 0 | 0 | 1 | 1 | 1 |
| Lgi3    | 0 | 0 | 0 | 0 | 1 | 0 | 0 | 0 | 1 | 1 | 1 |
| Lhx4    | 0 | 0 | 0 | 0 | 1 | 0 | 0 | 0 | 1 | 1 | 1 |
| Lifr    | 0 | 0 | 0 | 0 | 0 | 1 | 0 | 0 | 1 | 1 | 1 |
| Lilr4b  | 0 | 0 | 0 | 0 | 1 | 0 | 0 | 0 | 1 | 1 | 1 |
| Limch1  | 0 | 0 | 0 | 0 | 1 | 0 | 0 | 0 | 1 | 1 | 1 |
| Llg2    | 0 | 0 | 0 | 0 | 1 | 0 | 0 | 0 | 1 | 1 | 1 |
| Lmf2    | 0 | 0 | 0 | 0 | 1 | 0 | 0 | 0 | 1 | 1 | 1 |
| Lmln    | 0 | 0 | 0 | 0 | 1 | 0 | 0 | 0 | 1 | 1 | 1 |
| Lmnb1   | 0 | 0 | 0 | 0 | 1 | 0 | 0 | 0 | 1 | 1 | 1 |
| Lmx1a   | 0 | 0 | 0 | 0 | 1 | 0 | 0 | 0 | 1 | 1 | 1 |
| Lnpep   | 0 | 0 | 0 | 0 | 1 | 0 | 0 | 0 | 1 | 1 | 1 |
| Lonp1   | 0 | 0 | 0 | 0 | 1 | 0 | 0 | 0 | 1 | 1 | 1 |
| Loxhd1  | 0 | 0 | 0 | 0 | 1 | 0 | 0 | 0 | 1 | 1 | 1 |
| Lrba    | 0 | 0 | 0 | 0 | 1 | 0 | 0 | 0 | 1 | 1 | 1 |
| Lrfn5   | 0 | 0 | 0 | 0 | 1 | 0 | 0 | 0 | 1 | 1 | 1 |
| Lrig3   | 0 | 0 | 0 | 0 | 1 | 0 | 0 | 0 | 1 | 1 | 1 |
| Lrit2   | 0 | 0 | 0 | 0 | 1 | 0 | 0 | 0 | 1 | 1 | 1 |
| Lrmp    | 0 | 0 | 0 | 0 | 1 | 0 | 0 | 0 | 1 | 1 | 1 |
| Lrp1    | 0 | 0 | 0 | 0 | 1 | 0 | 0 | 0 | 1 | 1 | 1 |
| Lrp11   | 0 | 0 | 0 | 0 | 1 | 0 | 0 | 0 | 1 | 1 | 1 |
| Lrrc14b | 0 | 0 | 0 | 0 | 1 | 0 | 0 | 0 | 1 | 1 | 1 |
| Lrrc31  | 0 | 0 | 0 | 0 | 1 | 0 | 0 | 0 | 1 | 1 | 1 |
| Lrrc4   | 0 | 0 | 0 | 0 | 1 | 0 | 0 | 0 | 1 | 1 | 1 |
| Lrrc4c  | 0 | 0 | 0 | 0 | 1 | 0 | 0 | 0 | 1 | 1 | 1 |
| Lrrc56  | 0 | 0 | 0 | 0 | 1 | 0 | 0 | 0 | 1 | 1 | 1 |
| Lrriq1  | 0 | 0 | 0 | 0 | 1 | 0 | 0 | 0 | 1 | 1 | 1 |

|         |   |   |   |   |   |   |   |   |   |   |   |
|---------|---|---|---|---|---|---|---|---|---|---|---|
| Lrrtm1  | 0 | 0 | 0 | 0 | 1 | 0 | 0 | 0 | 1 | 1 | 1 |
| Lsm14a  | 0 | 0 | 0 | 0 | 1 | 0 | 0 | 0 | 1 | 1 | 1 |
| Ltbp2   | 0 | 0 | 0 | 0 | 0 | 1 | 0 | 0 | 1 | 1 | 1 |
| Ltbp4   | 0 | 0 | 0 | 0 | 1 | 0 | 0 | 0 | 1 | 1 | 1 |
| Ltk     | 0 | 0 | 0 | 0 | 1 | 0 | 0 | 0 | 1 | 1 | 1 |
| Lypd1   | 0 | 0 | 0 | 0 | 1 | 0 | 0 | 0 | 1 | 1 | 1 |
| Lztr1   | 0 | 0 | 0 | 0 | 1 | 0 | 0 | 0 | 1 | 1 | 1 |
| Maats1  | 0 | 0 | 0 | 0 | 1 | 0 | 0 | 0 | 1 | 1 | 1 |
| Mad2l1  | 0 | 0 | 0 | 0 | 1 | 0 | 0 | 0 | 1 | 1 | 1 |
| Maged1  | 0 | 0 | 0 | 0 | 1 | 0 | 0 | 0 | 1 | 1 | 1 |
| Mak     | 0 | 0 | 0 | 0 | 1 | 0 | 0 | 0 | 1 | 1 | 1 |
| Maml1   | 0 | 0 | 0 | 0 | 1 | 0 | 0 | 0 | 1 | 1 | 1 |
| Mamld1  | 0 | 0 | 0 | 0 | 1 | 0 | 0 | 0 | 1 | 1 | 1 |
| Man2b1  | 0 | 0 | 0 | 0 | 1 | 0 | 0 | 0 | 1 | 1 | 1 |
| Manba   | 0 | 0 | 0 | 0 | 1 | 0 | 0 | 0 | 1 | 1 | 1 |
| Maoa    | 0 | 0 | 0 | 0 | 1 | 0 | 0 | 0 | 1 | 1 | 1 |
| Map2k1  | 0 | 0 | 0 | 0 | 1 | 0 | 0 | 0 | 1 | 1 | 1 |
| Map3k12 | 0 | 0 | 0 | 0 | 1 | 0 | 0 | 0 | 1 | 1 | 1 |
| Map3k19 | 0 | 0 | 0 | 0 | 1 | 0 | 0 | 0 | 1 | 1 | 1 |
| Map3k2  | 0 | 0 | 0 | 0 | 0 | 0 | 1 | 0 | 1 | 1 | 1 |
| Map4    | 0 | 0 | 0 | 0 | 1 | 0 | 0 | 0 | 1 | 1 | 1 |
| Map4k4  | 0 | 0 | 1 | 0 | 0 | 0 | 0 | 0 | 1 | 1 | 1 |
| Map7    | 0 | 0 | 0 | 0 | 1 | 0 | 0 | 0 | 1 | 1 | 1 |
| Map9    | 0 | 0 | 0 | 0 | 1 | 0 | 0 | 0 | 1 | 1 | 1 |
| Mapk14  | 0 | 0 | 0 | 0 | 1 | 0 | 0 | 0 | 1 | 1 | 1 |
| March11 | 0 | 0 | 0 | 0 | 1 | 0 | 0 | 0 | 1 | 1 | 1 |
| Marco   | 0 | 0 | 0 | 0 | 1 | 0 | 0 | 0 | 1 | 1 | 1 |
| Matr3   | 0 | 0 | 0 | 0 | 1 | 0 | 0 | 0 | 1 | 1 | 1 |
| Mbd1    | 0 | 0 | 0 | 0 | 0 | 1 | 0 | 0 | 1 | 1 | 1 |
| Mbtps1  | 0 | 0 | 0 | 0 | 1 | 0 | 0 | 0 | 1 | 1 | 1 |
| Mc1r    | 0 | 0 | 0 | 0 | 1 | 0 | 0 | 0 | 1 | 1 | 1 |
| Mccc1   | 0 | 0 | 0 | 0 | 1 | 0 | 0 | 0 | 1 | 1 | 1 |
| Mcm4    | 0 | 0 | 0 | 0 | 1 | 0 | 0 | 0 | 1 | 1 | 1 |

|           |   |   |   |   |   |   |   |   |   |   |   |
|-----------|---|---|---|---|---|---|---|---|---|---|---|
| Mcm5      | 0 | 0 | 0 | 0 | 1 | 0 | 0 | 0 | 1 | 1 | 1 |
| Mcm6      | 0 | 0 | 0 | 0 | 1 | 0 | 0 | 0 | 1 | 1 | 1 |
| Mcm7      | 0 | 0 | 0 | 0 | 1 | 0 | 0 | 0 | 1 | 1 | 1 |
| Mcm8      | 0 | 0 | 0 | 0 | 1 | 0 | 0 | 0 | 1 | 1 | 1 |
| Mcph1     | 0 | 0 | 0 | 0 | 1 | 0 | 0 | 0 | 1 | 1 | 1 |
| Mcpt9     | 0 | 0 | 0 | 0 | 1 | 0 | 0 | 0 | 1 | 1 | 1 |
| Mctp1     | 0 | 0 | 0 | 0 | 1 | 0 | 0 | 0 | 1 | 1 | 1 |
| Mdga2     | 0 | 0 | 0 | 0 | 1 | 0 | 0 | 0 | 1 | 1 | 1 |
| Mdm2      | 0 | 0 | 0 | 0 | 1 | 0 | 0 | 0 | 1 | 1 | 1 |
| Me1       | 0 | 0 | 0 | 0 | 1 | 0 | 0 | 0 | 1 | 1 | 1 |
| Med1      | 0 | 0 | 0 | 0 | 1 | 0 | 0 | 0 | 1 | 1 | 1 |
| Med13l    | 0 | 0 | 0 | 0 | 1 | 0 | 0 | 0 | 1 | 1 | 1 |
| Mef2a     | 0 | 0 | 0 | 0 | 1 | 0 | 0 | 0 | 1 | 1 | 1 |
| Mefv      | 0 | 0 | 0 | 0 | 1 | 0 | 0 | 0 | 1 | 1 | 1 |
| Metap1d   | 0 | 0 | 0 | 0 | 1 | 0 | 0 | 0 | 1 | 1 | 1 |
| Mettl14   | 0 | 0 | 0 | 0 | 1 | 0 | 0 | 0 | 1 | 1 | 1 |
| Mettl18   | 0 | 0 | 0 | 0 | 1 | 0 | 0 | 0 | 1 | 1 | 1 |
| Mettl25   | 0 | 0 | 0 | 0 | 1 | 0 | 0 | 0 | 1 | 1 | 1 |
| Mettl3    | 0 | 0 | 0 | 0 | 1 | 0 | 0 | 0 | 1 | 1 | 1 |
| Mettl6    | 0 | 0 | 0 | 0 | 1 | 0 | 0 | 0 | 1 | 1 | 1 |
| Mettl7a2  | 0 | 0 | 0 | 0 | 1 | 0 | 0 | 0 | 1 | 1 | 1 |
| Mff       | 0 | 0 | 0 | 0 | 1 | 0 | 0 | 0 | 1 | 1 | 1 |
| Mfn2      | 0 | 0 | 0 | 0 | 0 | 0 | 1 | 0 | 1 | 1 | 1 |
| Mfsd4b2   | 0 | 0 | 0 | 0 | 1 | 0 | 0 | 0 | 1 | 1 | 1 |
| Mfsd6     | 0 | 0 | 0 | 0 | 1 | 0 | 0 | 0 | 1 | 1 | 1 |
| Mgat4e    | 0 | 0 | 0 | 0 | 1 | 0 | 0 | 0 | 1 | 1 | 1 |
| Mgme1     | 0 | 0 | 0 | 0 | 1 | 0 | 0 | 0 | 1 | 1 | 1 |
| Mical3    | 0 | 0 | 0 | 0 | 1 | 0 | 0 | 0 | 1 | 1 | 1 |
| Micu1     | 0 | 0 | 0 | 0 | 1 | 0 | 0 | 0 | 1 | 1 | 1 |
| Milr1     | 0 | 0 | 0 | 0 | 1 | 0 | 0 | 0 | 1 | 1 | 1 |
| Mindy2    | 0 | 0 | 0 | 0 | 1 | 0 | 0 | 0 | 1 | 1 | 1 |
| Mindy4b-p | 0 | 0 | 0 | 0 | 0 | 1 | 0 | 0 | 1 | 1 | 1 |
| Mink1     | 0 | 0 | 0 | 0 | 1 | 0 | 0 | 0 | 1 | 1 | 1 |

|          |   |   |   |   |   |   |   |   |   |   |   |
|----------|---|---|---|---|---|---|---|---|---|---|---|
| Minpp1   | 0 | 0 | 0 | 0 | 1 | 0 | 0 | 0 | 1 | 1 | 1 |
| Mios     | 0 | 0 | 0 | 0 | 1 | 0 | 0 | 0 | 1 | 1 | 1 |
| Mis18a   | 0 | 0 | 0 | 0 | 1 | 0 | 0 | 0 | 1 | 1 | 1 |
| Mis18bp1 | 0 | 0 | 0 | 0 | 1 | 0 | 0 | 0 | 1 | 1 | 1 |
| Mkl1     | 0 | 0 | 0 | 0 | 1 | 0 | 0 | 0 | 1 | 1 | 1 |
| Mkrn2    | 0 | 0 | 0 | 0 | 1 | 0 | 0 | 0 | 1 | 1 | 1 |
| Mkrn2os  | 0 | 0 | 0 | 0 | 1 | 0 | 0 | 0 | 1 | 1 | 1 |
| Mlh3     | 0 | 0 | 0 | 0 | 1 | 0 | 0 | 0 | 1 | 1 | 1 |
| Mkl      | 0 | 0 | 0 | 0 | 1 | 0 | 0 | 0 | 1 | 1 | 1 |
| Mmp1a    | 0 | 0 | 0 | 0 | 1 | 0 | 0 | 0 | 1 | 1 | 1 |
| Mmp1b    | 0 | 0 | 0 | 0 | 1 | 0 | 0 | 0 | 1 | 1 | 1 |
| Mms19    | 0 | 0 | 0 | 0 | 1 | 0 | 0 | 0 | 1 | 1 | 1 |
| Mns1     | 0 | 0 | 0 | 0 | 1 | 0 | 0 | 0 | 1 | 1 | 1 |
| Mob3b    | 0 | 0 | 0 | 0 | 1 | 0 | 0 | 0 | 1 | 1 | 1 |
| Mok      | 0 | 0 | 0 | 0 | 1 | 0 | 0 | 0 | 1 | 1 | 1 |
| Mpc2     | 0 | 0 | 0 | 0 | 1 | 0 | 0 | 0 | 1 | 1 | 1 |
| Mphosph8 | 0 | 0 | 0 | 0 | 1 | 0 | 0 | 0 | 1 | 1 | 1 |
| Mphosph9 | 0 | 0 | 0 | 0 | 1 | 0 | 0 | 0 | 1 | 1 | 1 |
| Mpp4     | 0 | 0 | 0 | 0 | 1 | 0 | 0 | 0 | 1 | 1 | 1 |
| Mr1      | 0 | 0 | 0 | 0 | 1 | 0 | 0 | 0 | 1 | 1 | 1 |
| Mrc2     | 0 | 0 | 0 | 0 | 1 | 0 | 0 | 0 | 1 | 1 | 1 |
| Mrgprb4  | 0 | 0 | 0 | 0 | 1 | 0 | 0 | 0 | 1 | 1 | 1 |
| Mrm2     | 0 | 0 | 0 | 0 | 1 | 0 | 0 | 0 | 1 | 1 | 1 |
| Mroh2a   | 0 | 0 | 0 | 0 | 1 | 0 | 0 | 0 | 1 | 1 | 1 |
| Mroh2b   | 0 | 0 | 0 | 0 | 1 | 0 | 0 | 0 | 1 | 1 | 1 |
| Mrpl21   | 0 | 0 | 0 | 0 | 1 | 0 | 0 | 0 | 1 | 1 | 1 |
| Mrpl47   | 0 | 0 | 0 | 0 | 1 | 0 | 0 | 0 | 1 | 1 | 1 |
| Mrpl9    | 0 | 0 | 0 | 0 | 0 | 1 | 0 | 0 | 1 | 1 | 1 |
| Mrps11   | 0 | 0 | 0 | 0 | 1 | 0 | 0 | 0 | 1 | 1 | 1 |
| Mrps22   | 0 | 0 | 0 | 0 | 1 | 0 | 0 | 0 | 1 | 1 | 1 |
| Mrps31   | 0 | 0 | 0 | 0 | 1 | 0 | 0 | 0 | 1 | 1 | 1 |
| Mrrf     | 0 | 0 | 0 | 0 | 1 | 0 | 0 | 0 | 1 | 1 | 1 |
| Mrvi1    | 0 | 0 | 0 | 0 | 1 | 0 | 0 | 0 | 1 | 1 | 1 |

|         |   |   |   |   |   |   |   |   |   |   |   |
|---------|---|---|---|---|---|---|---|---|---|---|---|
| Ms4a15  | 0 | 0 | 0 | 0 | 1 | 0 | 0 | 0 | 1 | 1 | 1 |
| Ms4a4d  | 0 | 0 | 0 | 0 | 1 | 0 | 0 | 0 | 1 | 1 | 1 |
| Ms4a6d  | 0 | 0 | 0 | 0 | 1 | 0 | 0 | 0 | 1 | 1 | 1 |
| Msantd1 | 0 | 0 | 0 | 0 | 1 | 0 | 0 | 0 | 1 | 1 | 1 |
| Msantd2 | 0 | 0 | 0 | 0 | 1 | 0 | 0 | 0 | 1 | 1 | 1 |
| Msh2    | 0 | 0 | 0 | 0 | 1 | 0 | 0 | 0 | 1 | 1 | 1 |
| Msi2    | 0 | 0 | 0 | 0 | 1 | 0 | 0 | 0 | 1 | 1 | 1 |
| Msl1    | 0 | 0 | 0 | 0 | 1 | 0 | 0 | 0 | 1 | 1 | 1 |
| Msl3l2  | 0 | 0 | 0 | 0 | 1 | 0 | 0 | 0 | 1 | 1 | 1 |
| Msmo1   | 0 | 0 | 0 | 0 | 1 | 0 | 0 | 0 | 1 | 1 | 1 |
| Msn     | 0 | 0 | 0 | 0 | 1 | 0 | 0 | 0 | 1 | 1 | 1 |
| Mterf1a | 0 | 0 | 0 | 0 | 1 | 0 | 0 | 0 | 1 | 1 | 1 |
| Mthfr   | 0 | 0 | 0 | 0 | 1 | 0 | 0 | 0 | 1 | 1 | 1 |
| Mtmr7   | 0 | 0 | 0 | 0 | 1 | 0 | 0 | 0 | 1 | 1 | 1 |
| Mtor    | 0 | 0 | 0 | 0 | 1 | 0 | 0 | 0 | 1 | 1 | 1 |
| Mtss1   | 0 | 0 | 0 | 0 | 1 | 0 | 0 | 0 | 1 | 1 | 1 |
| Muc1    | 0 | 0 | 0 | 0 | 1 | 0 | 0 | 0 | 1 | 1 | 1 |
| Muc13   | 0 | 0 | 0 | 0 | 1 | 0 | 0 | 0 | 1 | 1 | 1 |
| Muc2    | 0 | 0 | 0 | 0 | 0 | 0 | 1 | 0 | 1 | 1 | 1 |
| Muc20   | 0 | 0 | 0 | 0 | 1 | 0 | 0 | 0 | 1 | 1 | 1 |
| Muc4    | 0 | 0 | 0 | 0 | 1 | 0 | 0 | 0 | 1 | 1 | 1 |
| Mvb12b  | 0 | 0 | 0 | 0 | 1 | 0 | 0 | 0 | 1 | 1 | 1 |
| Mvp     | 0 | 0 | 0 | 0 | 1 | 0 | 0 | 0 | 1 | 1 | 1 |
| Mybpc2  | 0 | 0 | 0 | 0 | 1 | 0 | 0 | 0 | 1 | 1 | 1 |
| Mybpc3  | 0 | 0 | 0 | 0 | 1 | 0 | 0 | 0 | 1 | 1 | 1 |
| Mybph   | 0 | 0 | 0 | 0 | 1 | 0 | 0 | 0 | 1 | 1 | 1 |
| Mybphl  | 0 | 0 | 0 | 0 | 1 | 0 | 0 | 0 | 1 | 1 | 1 |
| Myef2   | 0 | 0 | 0 | 0 | 1 | 0 | 0 | 0 | 1 | 1 | 1 |
| Myh1    | 0 | 0 | 0 | 0 | 1 | 0 | 0 | 0 | 1 | 1 | 1 |
| Myh4    | 0 | 0 | 0 | 0 | 1 | 0 | 0 | 0 | 1 | 1 | 1 |
| Myh6    | 0 | 0 | 0 | 0 | 1 | 0 | 0 | 0 | 1 | 1 | 1 |
| Myl12a  | 0 | 0 | 0 | 0 | 1 | 0 | 0 | 0 | 1 | 1 | 1 |
| Myl2    | 0 | 0 | 0 | 0 | 1 | 0 | 0 | 0 | 1 | 1 | 1 |

|         |   |   |   |   |   |   |   |   |   |   |   |
|---------|---|---|---|---|---|---|---|---|---|---|---|
| Mylk3   | 0 | 0 | 0 | 0 | 1 | 0 | 0 | 0 | 1 | 1 | 1 |
| Mylpf   | 0 | 0 | 0 | 0 | 0 | 0 | 1 | 0 | 1 | 1 | 1 |
| Myo10   | 0 | 0 | 0 | 0 | 1 | 0 | 0 | 0 | 1 | 1 | 1 |
| Myo15b  | 0 | 0 | 0 | 0 | 1 | 0 | 0 | 0 | 1 | 1 | 1 |
| Myo3b   | 0 | 0 | 0 | 0 | 1 | 0 | 0 | 0 | 1 | 1 | 1 |
| Myo5b   | 0 | 0 | 0 | 0 | 1 | 0 | 0 | 0 | 1 | 1 | 1 |
| Myo7a   | 0 | 0 | 0 | 0 | 1 | 0 | 0 | 0 | 1 | 1 | 1 |
| Myof    | 0 | 0 | 0 | 0 | 1 | 0 | 0 | 0 | 1 | 1 | 1 |
| Myom1   | 0 | 0 | 0 | 0 | 1 | 0 | 0 | 0 | 1 | 1 | 1 |
| Mysm1   | 0 | 0 | 0 | 0 | 1 | 0 | 0 | 0 | 1 | 1 | 1 |
| N4bp2   | 0 | 0 | 0 | 0 | 1 | 0 | 0 | 0 | 1 | 1 | 1 |
| N4bp2l2 | 0 | 0 | 0 | 0 | 1 | 0 | 0 | 0 | 1 | 1 | 1 |
| Nabp1   | 0 | 0 | 0 | 0 | 1 | 0 | 0 | 0 | 1 | 1 | 1 |
| Nacad   | 0 | 0 | 0 | 0 | 1 | 0 | 0 | 0 | 1 | 1 | 1 |
| Nacc2   | 0 | 0 | 0 | 0 | 1 | 0 | 0 | 0 | 1 | 1 | 1 |
| Nalcn   | 0 | 0 | 0 | 0 | 1 | 0 | 0 | 0 | 1 | 1 | 1 |
| Nap1l5  | 0 | 0 | 0 | 0 | 1 | 0 | 0 | 0 | 1 | 1 | 1 |
| Napsa   | 0 | 0 | 0 | 0 | 1 | 0 | 0 | 0 | 1 | 1 | 1 |
| Nars    | 0 | 0 | 0 | 0 | 1 | 0 | 0 | 0 | 1 | 1 | 1 |
| Nasp    | 0 | 0 | 0 | 0 | 1 | 0 | 0 | 0 | 1 | 1 | 1 |
| Nat10   | 0 | 0 | 0 | 0 | 1 | 0 | 0 | 0 | 1 | 1 | 1 |
| Nat6    | 0 | 0 | 0 | 0 | 1 | 0 | 0 | 0 | 1 | 1 | 1 |
| Nat8f1  | 0 | 0 | 0 | 0 | 1 | 0 | 0 | 0 | 1 | 1 | 1 |
| Nat8l   | 0 | 0 | 0 | 0 | 1 | 0 | 0 | 0 | 1 | 1 | 1 |
| Nav2    | 0 | 0 | 0 | 0 | 1 | 0 | 0 | 0 | 1 | 1 | 1 |
| Ncam2   | 0 | 0 | 0 | 0 | 1 | 0 | 0 | 0 | 1 | 1 | 1 |
| Ncapd2  | 0 | 0 | 0 | 0 | 1 | 0 | 0 | 0 | 1 | 1 | 1 |
| Ncaph2  | 0 | 0 | 0 | 0 | 1 | 0 | 0 | 0 | 1 | 1 | 1 |
| Nckap5  | 0 | 0 | 0 | 0 | 1 | 0 | 0 | 0 | 1 | 1 | 1 |
| Nckipsd | 0 | 0 | 0 | 0 | 0 | 1 | 0 | 0 | 1 | 1 | 1 |
| Ncln    | 0 | 0 | 0 | 0 | 1 | 0 | 0 | 0 | 1 | 1 | 1 |
| Ncoa4   | 0 | 0 | 0 | 0 | 0 | 1 | 0 | 0 | 1 | 1 | 1 |
| Ncor2   | 0 | 0 | 0 | 0 | 1 | 0 | 0 | 0 | 1 | 1 | 1 |



|         |   |   |   |   |   |   |   |   |   |   |   |
|---------|---|---|---|---|---|---|---|---|---|---|---|
| Ndor1   | 0 | 0 | 0 | 0 | 1 | 0 | 0 | 0 | 1 | 1 | 1 |
| Ndrp1   | 0 | 0 | 0 | 0 | 0 | 0 | 1 | 0 | 1 | 1 | 1 |
| Ndufa8  | 0 | 0 | 0 | 0 | 1 | 0 | 0 | 0 | 1 | 1 | 1 |
| Ndufs3  | 0 | 0 | 0 | 0 | 1 | 0 | 0 | 0 | 1 | 1 | 1 |
| Ndufs8  | 0 | 0 | 0 | 0 | 1 | 0 | 0 | 0 | 1 | 1 | 1 |
| Nectin2 | 0 | 0 | 0 | 0 | 1 | 0 | 0 | 0 | 1 | 1 | 1 |
| Nectin3 | 0 | 0 | 0 | 0 | 1 | 0 | 0 | 0 | 1 | 1 | 1 |
| Nefh    | 0 | 0 | 0 | 0 | 1 | 0 | 0 | 0 | 1 | 1 | 1 |
| Nek11   | 0 | 0 | 0 | 0 | 1 | 0 | 0 | 0 | 1 | 1 | 1 |
| Nelfa   | 0 | 0 | 0 | 0 | 1 | 0 | 0 | 0 | 1 | 1 | 1 |
| Nell1   | 0 | 0 | 0 | 0 | 1 | 0 | 0 | 0 | 1 | 1 | 1 |
| Nes     | 0 | 0 | 0 | 0 | 1 | 0 | 0 | 0 | 1 | 1 | 1 |
| Neurl4  | 0 | 0 | 0 | 0 | 1 | 0 | 0 | 0 | 1 | 1 | 1 |
| Neurod6 | 0 | 0 | 0 | 0 | 1 | 0 | 0 | 0 | 1 | 1 | 1 |
| Nexmif  | 0 | 0 | 0 | 0 | 1 | 0 | 0 | 0 | 1 | 1 | 1 |
| Nfatc2  | 0 | 0 | 0 | 0 | 1 | 0 | 0 | 0 | 1 | 1 | 1 |
| Nfkb1   | 0 | 0 | 0 | 0 | 1 | 0 | 0 | 0 | 1 | 1 | 1 |
| Nfx1    | 0 | 0 | 0 | 0 | 1 | 0 | 0 | 0 | 1 | 1 | 1 |
| Nhlrc1  | 0 | 0 | 0 | 0 | 1 | 0 | 0 | 0 | 1 | 1 | 1 |
| Nhlrc2  | 0 | 0 | 0 | 0 | 1 | 0 | 0 | 0 | 1 | 1 | 1 |
| Nhsl1   | 0 | 0 | 0 | 0 | 1 | 0 | 0 | 0 | 1 | 1 | 1 |
| Nid2    | 0 | 0 | 0 | 0 | 1 | 0 | 0 | 0 | 1 | 1 | 1 |
| Nipa2   | 0 | 0 | 0 | 0 | 0 | 1 | 0 | 0 | 1 | 1 | 1 |
| Nipal1  | 0 | 0 | 0 | 0 | 1 | 0 | 0 | 0 | 1 | 1 | 1 |
| Nipal3  | 0 | 0 | 0 | 0 | 1 | 0 | 0 | 0 | 1 | 1 | 1 |
| Nipbl   | 0 | 0 | 0 | 0 | 1 | 0 | 0 | 0 | 1 | 1 | 1 |
| Nkapl   | 0 | 0 | 0 | 0 | 1 | 0 | 0 | 0 | 1 | 1 | 1 |
| Nkiras1 | 0 | 0 | 0 | 0 | 1 | 0 | 0 | 0 | 1 | 1 | 1 |
| Nkiras2 | 0 | 0 | 0 | 0 | 1 | 0 | 0 | 0 | 1 | 1 | 1 |
| Nktr    | 0 | 0 | 0 | 0 | 0 | 1 | 0 | 0 | 1 | 1 | 1 |
| Nkx2-2  | 0 | 0 | 0 | 0 | 1 | 0 | 0 | 0 | 1 | 1 | 1 |
| Nlrp12  | 0 | 0 | 0 | 0 | 1 | 0 | 0 | 0 | 1 | 1 | 1 |
| Nlrp6   | 0 | 0 | 0 | 0 | 1 | 0 | 0 | 0 | 1 | 1 | 1 |

|        |   |   |   |   |   |   |   |   |   |   |   |
|--------|---|---|---|---|---|---|---|---|---|---|---|
| Nlrp9a | 0 | 0 | 0 | 0 | 1 | 0 | 0 | 0 | 1 | 1 | 1 |
| Nod2   | 0 | 0 | 0 | 0 | 1 | 0 | 0 | 0 | 1 | 1 | 1 |
| Nolc1  | 0 | 0 | 0 | 0 | 1 | 0 | 0 | 0 | 1 | 1 | 1 |
| Nop53  | 0 | 0 | 0 | 0 | 0 | 0 | 1 | 0 | 1 | 1 | 1 |
| Nos1ap | 0 | 0 | 0 | 0 | 1 | 0 | 0 | 0 | 1 | 1 | 1 |
| Notch2 | 0 | 0 | 0 | 0 | 1 | 0 | 0 | 0 | 1 | 1 | 1 |
| Notch4 | 0 | 0 | 0 | 0 | 1 | 0 | 0 | 0 | 1 | 1 | 1 |
| Nova1  | 0 | 0 | 0 | 0 | 1 | 0 | 0 | 0 | 1 | 1 | 1 |
| Nox4   | 0 | 0 | 0 | 0 | 1 | 0 | 0 | 0 | 1 | 1 | 1 |
| Npas2  | 0 | 0 | 0 | 0 | 0 | 1 | 0 | 0 | 1 | 1 | 1 |
| Npas3  | 0 | 0 | 0 | 0 | 1 | 0 | 0 | 0 | 1 | 1 | 1 |
| Npat   | 0 | 0 | 0 | 0 | 1 | 0 | 0 | 0 | 1 | 1 | 1 |
| Npc1l1 | 0 | 0 | 0 | 0 | 1 | 0 | 0 | 0 | 1 | 1 | 1 |
| Npepps | 0 | 0 | 0 | 0 | 1 | 0 | 0 | 0 | 1 | 1 | 1 |
| Npffr1 | 0 | 0 | 0 | 0 | 1 | 0 | 0 | 0 | 1 | 1 | 1 |
| Npffr2 | 0 | 0 | 0 | 0 | 0 | 1 | 0 | 0 | 1 | 1 | 1 |
| Npr3   | 0 | 0 | 0 | 0 | 1 | 0 | 0 | 0 | 1 | 1 | 1 |
| Npy4r  | 0 | 0 | 0 | 0 | 1 | 0 | 0 | 0 | 1 | 1 | 1 |
| Nr2f2  | 0 | 0 | 0 | 0 | 1 | 0 | 0 | 0 | 1 | 1 | 1 |
| Nr3c2  | 0 | 0 | 0 | 0 | 1 | 0 | 0 | 0 | 1 | 1 | 1 |
| Nr4a1  | 0 | 0 | 0 | 0 | 1 | 0 | 0 | 0 | 1 | 1 | 1 |
| Nrde2  | 0 | 0 | 0 | 0 | 1 | 0 | 0 | 0 | 1 | 1 | 1 |
| Nrg2   | 0 | 0 | 0 | 0 | 1 | 0 | 0 | 0 | 1 | 1 | 1 |
| Nrk    | 0 | 0 | 0 | 0 | 1 | 0 | 0 | 0 | 1 | 1 | 1 |
| Nrp2   | 0 | 0 | 0 | 0 | 1 | 0 | 0 | 0 | 1 | 1 | 1 |
| Nrxn1  | 0 | 0 | 0 | 0 | 1 | 0 | 0 | 0 | 1 | 1 | 1 |
| Nsl1   | 0 | 0 | 0 | 0 | 1 | 0 | 0 | 0 | 1 | 1 | 1 |
| Nsmaf  | 0 | 0 | 0 | 0 | 1 | 0 | 0 | 0 | 1 | 1 | 1 |
| Nsun3  | 0 | 0 | 0 | 0 | 1 | 0 | 0 | 0 | 1 | 1 | 1 |
| Nsun7  | 0 | 0 | 0 | 0 | 1 | 0 | 0 | 0 | 1 | 1 | 1 |
| Nt5c2  | 0 | 0 | 0 | 0 | 1 | 0 | 0 | 0 | 1 | 1 | 1 |
| Nt5e   | 0 | 0 | 0 | 0 | 1 | 0 | 0 | 0 | 1 | 1 | 1 |
| Nthl1  | 0 | 0 | 0 | 0 | 1 | 0 | 0 | 0 | 1 | 1 | 1 |

|          |   |   |   |   |   |   |   |   |   |   |   |
|----------|---|---|---|---|---|---|---|---|---|---|---|
| Ntn1     | 0 | 0 | 0 | 0 | 1 | 0 | 0 | 0 | 1 | 1 | 1 |
| Ntpcr    | 0 | 0 | 0 | 0 | 1 | 0 | 0 | 0 | 1 | 1 | 1 |
| Nts      | 0 | 0 | 0 | 0 | 1 | 0 | 0 | 0 | 1 | 1 | 1 |
| Nuak1    | 0 | 0 | 0 | 0 | 1 | 0 | 0 | 0 | 1 | 1 | 1 |
| Nubp1    | 0 | 0 | 0 | 0 | 1 | 0 | 0 | 0 | 1 | 1 | 1 |
| Nudt5    | 0 | 0 | 0 | 0 | 1 | 0 | 0 | 0 | 1 | 1 | 1 |
| Nuf2     | 0 | 0 | 0 | 0 | 1 | 0 | 0 | 0 | 1 | 1 | 1 |
| Nufip1   | 0 | 0 | 0 | 0 | 1 | 0 | 0 | 0 | 1 | 1 | 1 |
| Nuggc    | 0 | 0 | 0 | 0 | 0 | 0 | 1 | 0 | 1 | 1 | 1 |
| Nup210l  | 0 | 0 | 0 | 0 | 1 | 0 | 0 | 0 | 1 | 1 | 1 |
| Nup35    | 0 | 0 | 0 | 0 | 1 | 0 | 0 | 0 | 1 | 1 | 1 |
| Nup50    | 0 | 0 | 0 | 0 | 1 | 0 | 0 | 0 | 1 | 1 | 1 |
| Nup85    | 0 | 0 | 0 | 0 | 1 | 0 | 0 | 0 | 1 | 1 | 1 |
| Nupl2    | 0 | 0 | 0 | 0 | 1 | 0 | 0 | 0 | 1 | 1 | 1 |
| Nus1     | 0 | 0 | 0 | 0 | 1 | 0 | 0 | 0 | 1 | 1 | 1 |
| Nvl      | 0 | 0 | 0 | 0 | 0 | 1 | 0 | 0 | 1 | 1 | 1 |
| Nxpe3    | 0 | 0 | 0 | 0 | 1 | 0 | 0 | 0 | 1 | 1 | 1 |
| Nxt2     | 0 | 0 | 0 | 1 | 0 | 0 | 0 | 0 | 1 | 1 | 1 |
| Oacyl    | 0 | 0 | 0 | 0 | 1 | 0 | 0 | 0 | 1 | 1 | 1 |
| Oas1g    | 0 | 0 | 0 | 0 | 0 | 1 | 0 | 0 | 1 | 1 | 1 |
| Obox2    | 0 | 0 | 0 | 0 | 1 | 0 | 0 | 0 | 1 | 1 | 1 |
| Ogdhl    | 0 | 0 | 0 | 0 | 0 | 1 | 0 | 0 | 1 | 1 | 1 |
| Oit3     | 0 | 0 | 0 | 0 | 1 | 0 | 0 | 0 | 1 | 1 | 1 |
| Olfr1002 | 0 | 0 | 0 | 0 | 1 | 0 | 0 | 0 | 1 | 1 | 1 |
| Olfr1013 | 0 | 0 | 0 | 0 | 1 | 0 | 0 | 0 | 1 | 1 | 1 |
| Olfr1051 | 0 | 0 | 0 | 0 | 1 | 0 | 0 | 0 | 1 | 1 | 1 |
| Olfr1052 | 0 | 0 | 0 | 0 | 1 | 0 | 0 | 0 | 1 | 1 | 1 |
| Olfr1058 | 0 | 0 | 0 | 0 | 1 | 0 | 0 | 0 | 1 | 1 | 1 |
| Olfr1085 | 0 | 0 | 0 | 0 | 1 | 0 | 0 | 0 | 1 | 1 | 1 |
| Olfr1090 | 0 | 0 | 0 | 0 | 1 | 0 | 0 | 0 | 1 | 1 | 1 |
| Olfr1097 | 0 | 0 | 0 | 0 | 1 | 0 | 0 | 0 | 1 | 1 | 1 |
| Olfr1105 | 0 | 0 | 0 | 0 | 1 | 0 | 0 | 0 | 1 | 1 | 1 |
| Olfr1120 | 0 | 0 | 0 | 0 | 1 | 0 | 0 | 0 | 1 | 1 | 1 |

|          |   |   |   |   |   |   |   |   |   |   |   |
|----------|---|---|---|---|---|---|---|---|---|---|---|
| Olfr1123 | 0 | 0 | 0 | 0 | 1 | 0 | 0 | 0 | 1 | 1 | 1 |
| Olfr1126 | 0 | 0 | 0 | 0 | 1 | 0 | 0 | 0 | 1 | 1 | 1 |
| Olfr1130 | 0 | 0 | 0 | 0 | 1 | 0 | 0 | 0 | 1 | 1 | 1 |
| Olfr1145 | 0 | 0 | 0 | 0 | 1 | 0 | 0 | 0 | 1 | 1 | 1 |
| Olfr1180 | 0 | 0 | 0 | 0 | 1 | 0 | 0 | 0 | 1 | 1 | 1 |
| Olfr1202 | 0 | 0 | 0 | 0 | 1 | 0 | 0 | 0 | 1 | 1 | 1 |
| Olfr121  | 0 | 0 | 0 | 0 | 1 | 0 | 0 | 0 | 1 | 1 | 1 |
| Olfr1226 | 0 | 0 | 0 | 0 | 1 | 0 | 0 | 0 | 1 | 1 | 1 |
| Olfr1228 | 0 | 0 | 0 | 0 | 0 | 1 | 0 | 0 | 1 | 1 | 1 |
| Olfr1238 | 0 | 0 | 0 | 0 | 1 | 0 | 0 | 0 | 1 | 1 | 1 |
| Olfr1240 | 0 | 0 | 0 | 0 | 1 | 0 | 0 | 0 | 1 | 1 | 1 |
| Olfr1248 | 0 | 0 | 0 | 0 | 1 | 0 | 0 | 0 | 1 | 1 | 1 |
| Olfr1249 | 0 | 1 | 0 | 0 | 0 | 0 | 0 | 0 | 1 | 1 | 1 |
| Olfr1264 | 0 | 0 | 0 | 0 | 1 | 0 | 0 | 0 | 1 | 1 | 1 |
| Olfr1271 | 0 | 0 | 0 | 0 | 0 | 1 | 0 | 0 | 1 | 1 | 1 |
| Olfr1276 | 0 | 0 | 0 | 0 | 1 | 0 | 0 | 0 | 1 | 1 | 1 |
| Olfr1281 | 0 | 0 | 0 | 0 | 1 | 0 | 0 | 0 | 1 | 1 | 1 |
| Olfr1282 | 0 | 0 | 0 | 0 | 1 | 0 | 0 | 0 | 1 | 1 | 1 |
| Olfr131  | 0 | 0 | 0 | 0 | 1 | 0 | 0 | 0 | 1 | 1 | 1 |
| Olfr1313 | 0 | 0 | 0 | 0 | 1 | 0 | 0 | 0 | 1 | 1 | 1 |
| Olfr133  | 0 | 0 | 0 | 0 | 1 | 0 | 0 | 0 | 1 | 1 | 1 |
| Olfr1330 | 0 | 0 | 0 | 0 | 1 | 0 | 0 | 0 | 1 | 1 | 1 |
| Olfr1347 | 0 | 0 | 0 | 0 | 1 | 0 | 0 | 0 | 1 | 1 | 1 |
| Olfr1349 | 0 | 0 | 0 | 0 | 1 | 0 | 0 | 0 | 1 | 1 | 1 |
| Olfr1364 | 0 | 0 | 0 | 0 | 1 | 0 | 0 | 0 | 1 | 1 | 1 |
| Olfr1389 | 0 | 0 | 0 | 0 | 1 | 0 | 0 | 0 | 1 | 1 | 1 |
| Olfr1395 | 0 | 0 | 0 | 0 | 1 | 0 | 0 | 0 | 1 | 1 | 1 |
| Olfr1406 | 0 | 0 | 0 | 0 | 1 | 0 | 0 | 0 | 1 | 1 | 1 |
| Olfr1412 | 0 | 0 | 0 | 0 | 1 | 0 | 0 | 0 | 1 | 1 | 1 |
| Olfr1413 | 0 | 0 | 0 | 0 | 1 | 0 | 0 | 0 | 1 | 1 | 1 |
| Olfr1417 | 0 | 0 | 0 | 0 | 1 | 0 | 0 | 0 | 1 | 1 | 1 |
| Olfr1418 | 0 | 0 | 0 | 0 | 1 | 0 | 0 | 0 | 1 | 1 | 1 |
| Olfr142  | 0 | 0 | 0 | 0 | 1 | 0 | 0 | 0 | 1 | 1 | 1 |

|            |   |   |   |   |   |   |   |   |   |   |   |
|------------|---|---|---|---|---|---|---|---|---|---|---|
| Olfr1426   | 0 | 0 | 0 | 0 | 1 | 0 | 0 | 0 | 1 | 1 | 1 |
| Olfr1448   | 0 | 0 | 0 | 0 | 1 | 0 | 0 | 0 | 1 | 1 | 1 |
| Olfr1454   | 0 | 0 | 1 | 0 | 0 | 0 | 0 | 0 | 1 | 1 | 1 |
| Olfr156    | 0 | 0 | 0 | 0 | 1 | 0 | 0 | 0 | 1 | 1 | 1 |
| Olfr159    | 0 | 0 | 0 | 0 | 1 | 0 | 0 | 0 | 1 | 1 | 1 |
| Olfr170    | 0 | 0 | 0 | 0 | 1 | 0 | 0 | 0 | 1 | 1 | 1 |
| Olfr171    | 0 | 0 | 0 | 0 | 1 | 0 | 0 | 0 | 1 | 1 | 1 |
| Olfr183    | 0 | 0 | 0 | 0 | 1 | 0 | 0 | 0 | 1 | 1 | 1 |
| Olfr193    | 0 | 0 | 0 | 0 | 1 | 0 | 0 | 0 | 1 | 1 | 1 |
| Olfr197    | 0 | 0 | 0 | 0 | 1 | 0 | 0 | 0 | 1 | 1 | 1 |
| Olfr201    | 0 | 0 | 0 | 0 | 1 | 0 | 0 | 0 | 1 | 1 | 1 |
| Olfr212    | 0 | 0 | 0 | 0 | 1 | 0 | 0 | 0 | 1 | 1 | 1 |
| Olfr243    | 0 | 0 | 0 | 0 | 1 | 0 | 0 | 0 | 1 | 1 | 1 |
| Olfr250    | 0 | 0 | 0 | 0 | 1 | 0 | 0 | 0 | 1 | 1 | 1 |
| Olfr270    | 0 | 0 | 0 | 0 | 1 | 0 | 0 | 0 | 1 | 1 | 1 |
| Olfr298    | 0 | 0 | 0 | 0 | 1 | 0 | 0 | 0 | 1 | 1 | 1 |
| Olfr314    | 0 | 0 | 0 | 0 | 1 | 0 | 0 | 0 | 1 | 1 | 1 |
| Olfr325    | 0 | 0 | 0 | 0 | 1 | 0 | 0 | 0 | 1 | 1 | 1 |
| Olfr331    | 0 | 0 | 0 | 0 | 1 | 0 | 0 | 0 | 1 | 1 | 1 |
| Olfr338    | 0 | 0 | 0 | 0 | 1 | 0 | 0 | 0 | 1 | 1 | 1 |
| Olfr348    | 0 | 0 | 0 | 0 | 1 | 0 | 0 | 0 | 1 | 1 | 1 |
| Olfr362    | 0 | 0 | 0 | 0 | 1 | 0 | 0 | 0 | 1 | 1 | 1 |
| Olfr372    | 0 | 0 | 0 | 0 | 1 | 0 | 0 | 0 | 1 | 1 | 1 |
| Olfr391-ps | 0 | 0 | 0 | 0 | 1 | 0 | 0 | 0 | 1 | 1 | 1 |
| Olfr434    | 0 | 0 | 0 | 0 | 1 | 0 | 0 | 0 | 1 | 1 | 1 |
| Olfr435    | 0 | 0 | 0 | 0 | 1 | 0 | 0 | 0 | 1 | 1 | 1 |
| Olfr449    | 0 | 0 | 0 | 0 | 1 | 0 | 0 | 0 | 1 | 1 | 1 |
| Olfr457    | 0 | 0 | 0 | 0 | 1 | 0 | 0 | 0 | 1 | 1 | 1 |
| Olfr460    | 0 | 0 | 0 | 0 | 1 | 0 | 0 | 0 | 1 | 1 | 1 |
| Olfr469    | 0 | 0 | 0 | 0 | 1 | 0 | 0 | 0 | 1 | 1 | 1 |
| Olfr470    | 0 | 0 | 0 | 0 | 1 | 0 | 0 | 0 | 1 | 1 | 1 |
| Olfr472    | 0 | 0 | 0 | 0 | 1 | 0 | 0 | 0 | 1 | 1 | 1 |
| Olfr473    | 0 | 0 | 0 | 0 | 1 | 0 | 0 | 0 | 1 | 1 | 1 |

|         |   |   |   |   |   |   |   |   |   |   |   |
|---------|---|---|---|---|---|---|---|---|---|---|---|
| Olfr478 | 0 | 0 | 0 | 0 | 1 | 0 | 0 | 0 | 1 | 1 | 1 |
| Olfr493 | 0 | 0 | 0 | 0 | 1 | 0 | 0 | 0 | 1 | 1 | 1 |
| Olfr506 | 0 | 0 | 0 | 0 | 1 | 0 | 0 | 0 | 1 | 1 | 1 |
| Olfr510 | 0 | 0 | 0 | 0 | 1 | 0 | 0 | 0 | 1 | 1 | 1 |
| Olfr514 | 0 | 0 | 0 | 0 | 1 | 0 | 0 | 0 | 1 | 1 | 1 |
| Olfr517 | 0 | 0 | 0 | 0 | 1 | 0 | 0 | 0 | 1 | 1 | 1 |
| Olfr52  | 0 | 0 | 0 | 0 | 1 | 0 | 0 | 0 | 1 | 1 | 1 |
| Olfr53  | 0 | 0 | 0 | 0 | 1 | 0 | 0 | 0 | 1 | 1 | 1 |
| Olfr532 | 0 | 0 | 0 | 0 | 1 | 0 | 0 | 0 | 1 | 1 | 1 |
| Olfr536 | 0 | 0 | 0 | 0 | 1 | 0 | 0 | 0 | 1 | 1 | 1 |
| Olfr543 | 0 | 0 | 0 | 0 | 1 | 0 | 0 | 0 | 1 | 1 | 1 |
| Olfr561 | 0 | 0 | 0 | 0 | 0 | 1 | 0 | 0 | 1 | 1 | 1 |
| Olfr575 | 0 | 0 | 0 | 0 | 1 | 0 | 0 | 0 | 1 | 1 | 1 |
| Olfr601 | 0 | 0 | 0 | 0 | 1 | 0 | 0 | 0 | 1 | 1 | 1 |
| Olfr615 | 0 | 0 | 0 | 0 | 1 | 0 | 0 | 0 | 1 | 1 | 1 |
| Olfr629 | 0 | 0 | 0 | 0 | 1 | 0 | 0 | 0 | 1 | 1 | 1 |
| Olfr644 | 0 | 0 | 0 | 0 | 1 | 0 | 0 | 0 | 1 | 1 | 1 |
| Olfr648 | 0 | 0 | 0 | 0 | 1 | 0 | 0 | 0 | 1 | 1 | 1 |
| Olfr66  | 0 | 0 | 0 | 0 | 1 | 0 | 0 | 0 | 1 | 1 | 1 |
| Olfr663 | 0 | 0 | 0 | 0 | 0 | 1 | 0 | 0 | 1 | 1 | 1 |
| Olfr664 | 0 | 0 | 0 | 0 | 1 | 0 | 0 | 0 | 1 | 1 | 1 |
| Olfr672 | 0 | 0 | 0 | 0 | 1 | 0 | 0 | 0 | 1 | 1 | 1 |
| Olfr677 | 0 | 0 | 0 | 0 | 1 | 0 | 0 | 0 | 1 | 1 | 1 |
| Olfr679 | 0 | 0 | 0 | 0 | 1 | 0 | 0 | 0 | 1 | 1 | 1 |
| Olfr685 | 0 | 0 | 0 | 0 | 1 | 0 | 0 | 0 | 1 | 1 | 1 |
| Olfr691 | 0 | 0 | 0 | 0 | 1 | 0 | 0 | 0 | 1 | 1 | 1 |
| Olfr695 | 0 | 0 | 0 | 0 | 1 | 0 | 0 | 0 | 1 | 1 | 1 |
| Olfr700 | 0 | 0 | 0 | 0 | 1 | 0 | 0 | 0 | 1 | 1 | 1 |
| Olfr704 | 0 | 0 | 0 | 0 | 1 | 0 | 0 | 0 | 1 | 1 | 1 |
| Olfr710 | 0 | 0 | 0 | 0 | 1 | 0 | 0 | 0 | 1 | 1 | 1 |
| Olfr722 | 0 | 0 | 0 | 0 | 1 | 0 | 0 | 0 | 1 | 1 | 1 |
| Olfr773 | 0 | 0 | 0 | 0 | 1 | 0 | 0 | 0 | 1 | 1 | 1 |
| Olfr774 | 0 | 0 | 0 | 0 | 0 | 0 | 0 | 1 | 1 | 1 | 1 |

|         |   |   |   |   |   |   |   |   |   |   |   |
|---------|---|---|---|---|---|---|---|---|---|---|---|
| Olf781  | 0 | 0 | 0 | 0 | 1 | 0 | 0 | 0 | 1 | 1 | 1 |
| Olf810  | 0 | 0 | 0 | 0 | 1 | 0 | 0 | 0 | 1 | 1 | 1 |
| Olf834  | 0 | 0 | 0 | 0 | 1 | 0 | 0 | 0 | 1 | 1 | 1 |
| Olf854  | 0 | 0 | 0 | 0 | 1 | 0 | 0 | 0 | 1 | 1 | 1 |
| Olf870  | 0 | 0 | 0 | 0 | 1 | 0 | 0 | 0 | 1 | 1 | 1 |
| Olf891  | 0 | 0 | 0 | 0 | 1 | 0 | 0 | 0 | 1 | 1 | 1 |
| Olf901  | 0 | 0 | 0 | 0 | 0 | 1 | 0 | 0 | 1 | 1 | 1 |
| Olf951  | 1 | 0 | 0 | 0 | 0 | 0 | 0 | 0 | 1 | 1 | 1 |
| Olf957  | 0 | 0 | 0 | 0 | 1 | 0 | 0 | 0 | 1 | 1 | 1 |
| Olf967  | 0 | 0 | 0 | 0 | 1 | 0 | 0 | 0 | 1 | 1 | 1 |
| Olf969  | 0 | 0 | 0 | 0 | 1 | 0 | 0 | 0 | 1 | 1 | 1 |
| Onecut1 | 0 | 0 | 0 | 0 | 1 | 0 | 0 | 0 | 1 | 1 | 1 |
| Oplah   | 0 | 0 | 0 | 0 | 1 | 0 | 0 | 0 | 1 | 1 | 1 |
| Optc    | 0 | 0 | 0 | 0 | 1 | 0 | 0 | 0 | 1 | 1 | 1 |
| Orc1    | 0 | 0 | 0 | 0 | 1 | 0 | 0 | 0 | 1 | 1 | 1 |
| Ormdl3  | 0 | 0 | 0 | 0 | 1 | 0 | 0 | 0 | 1 | 1 | 1 |
| Osbpl1a | 0 | 0 | 0 | 0 | 0 | 0 | 1 | 0 | 1 | 1 | 1 |
| Osbpl7  | 0 | 0 | 0 | 0 | 1 | 0 | 0 | 0 | 1 | 1 | 1 |
| Otoa    | 0 | 0 | 0 | 0 | 1 | 0 | 0 | 0 | 1 | 1 | 1 |
| Otof    | 0 | 0 | 0 | 0 | 1 | 0 | 0 | 0 | 1 | 1 | 1 |
| Otop3   | 0 | 0 | 0 | 0 | 1 | 0 | 0 | 0 | 1 | 1 | 1 |
| Ovgp1   | 0 | 0 | 0 | 0 | 1 | 0 | 0 | 0 | 1 | 1 | 1 |
| Oxct2a  | 0 | 0 | 0 | 0 | 1 | 0 | 0 | 0 | 1 | 1 | 1 |
| Oxsr1   | 0 | 0 | 0 | 0 | 1 | 0 | 0 | 0 | 1 | 1 | 1 |
| P2ry1   | 0 | 0 | 0 | 0 | 1 | 0 | 0 | 0 | 1 | 1 | 1 |
| P2ry2   | 0 | 0 | 0 | 0 | 1 | 0 | 0 | 0 | 1 | 1 | 1 |
| P2ry6   | 0 | 0 | 0 | 0 | 1 | 0 | 0 | 0 | 1 | 1 | 1 |
| P4ha1   | 0 | 0 | 0 | 0 | 0 | 1 | 0 | 0 | 1 | 1 | 1 |
| Pabpc1  | 0 | 0 | 0 | 0 | 0 | 0 | 1 | 0 | 1 | 1 | 1 |
| Pabpc2  | 0 | 0 | 0 | 1 | 0 | 0 | 0 | 0 | 1 | 1 | 1 |
| Pabpc4l | 0 | 0 | 0 | 0 | 1 | 0 | 0 | 0 | 1 | 1 | 1 |
| Pabpc6  | 0 | 0 | 0 | 0 | 1 | 0 | 0 | 0 | 1 | 1 | 1 |
| Padi3   | 0 | 0 | 0 | 0 | 1 | 0 | 0 | 0 | 1 | 1 | 1 |

|         |   |   |   |   |   |   |   |   |   |   |   |
|---------|---|---|---|---|---|---|---|---|---|---|---|
| Padi6   | 0 | 0 | 0 | 0 | 1 | 0 | 0 | 0 | 1 | 1 | 1 |
| Pag1    | 0 | 0 | 0 | 0 | 1 | 0 | 0 | 0 | 1 | 1 | 1 |
| Paip2b  | 0 | 0 | 0 | 0 | 1 | 0 | 0 | 0 | 1 | 1 | 1 |
| Pak7    | 0 | 0 | 0 | 0 | 1 | 0 | 0 | 0 | 1 | 1 | 1 |
| Pakap   | 0 | 0 | 0 | 0 | 0 | 1 | 0 | 0 | 1 | 1 | 1 |
| Palm3   | 0 | 0 | 0 | 0 | 1 | 0 | 0 | 0 | 1 | 1 | 1 |
| Palmd   | 0 | 0 | 0 | 0 | 1 | 0 | 0 | 0 | 1 | 1 | 1 |
| Pappa   | 0 | 0 | 0 | 0 | 1 | 0 | 0 | 0 | 1 | 1 | 1 |
| Pappa2  | 0 | 0 | 0 | 0 | 1 | 0 | 0 | 0 | 1 | 1 | 1 |
| Paqr9   | 0 | 0 | 0 | 0 | 1 | 0 | 0 | 0 | 1 | 1 | 1 |
| Pard3   | 0 | 0 | 0 | 0 | 0 | 0 | 1 | 0 | 1 | 1 | 1 |
| Pard3b  | 0 | 0 | 0 | 0 | 1 | 0 | 0 | 0 | 1 | 1 | 1 |
| Parg    | 0 | 0 | 0 | 0 | 1 | 0 | 0 | 0 | 1 | 1 | 1 |
| Parl    | 0 | 0 | 0 | 0 | 1 | 0 | 0 | 0 | 1 | 1 | 1 |
| Parm1   | 0 | 0 | 0 | 0 | 1 | 0 | 0 | 0 | 1 | 1 | 1 |
| Parn    | 0 | 0 | 0 | 0 | 0 | 0 | 1 | 0 | 1 | 1 | 1 |
| Parp9   | 0 | 0 | 0 | 0 | 0 | 1 | 0 | 0 | 1 | 1 | 1 |
| Parvb   | 0 | 0 | 0 | 0 | 0 | 0 | 1 | 0 | 1 | 1 | 1 |
| Patl2   | 0 | 0 | 0 | 0 | 0 | 1 | 0 | 0 | 1 | 1 | 1 |
| Pawr    | 0 | 0 | 0 | 0 | 1 | 0 | 0 | 0 | 1 | 1 | 1 |
| Pax1    | 0 | 0 | 0 | 0 | 1 | 0 | 0 | 0 | 1 | 1 | 1 |
| Pbx1    | 0 | 0 | 0 | 0 | 0 | 0 | 1 | 0 | 1 | 1 | 1 |
| Pbx3    | 0 | 0 | 0 | 1 | 0 | 0 | 0 | 0 | 1 | 1 | 1 |
| Pcbp1   | 0 | 0 | 0 | 0 | 1 | 0 | 0 | 0 | 1 | 1 | 1 |
| Pcbp3   | 0 | 0 | 0 | 0 | 1 | 0 | 0 | 0 | 1 | 1 | 1 |
| Pcbp4   | 0 | 0 | 0 | 0 | 0 | 0 | 1 | 0 | 1 | 1 | 1 |
| Pcca    | 0 | 0 | 0 | 0 | 1 | 0 | 0 | 0 | 1 | 1 | 1 |
| Pcdh1   | 0 | 0 | 0 | 0 | 1 | 0 | 0 | 0 | 1 | 1 | 1 |
| Pcdh10  | 0 | 0 | 0 | 0 | 0 | 1 | 0 | 0 | 1 | 1 | 1 |
| Pcdh12  | 0 | 0 | 0 | 0 | 1 | 0 | 0 | 0 | 1 | 1 | 1 |
| Pcdha1  | 0 | 0 | 0 | 0 | 1 | 0 | 0 | 0 | 1 | 1 | 1 |
| Pcdha11 | 0 | 0 | 0 | 0 | 1 | 0 | 0 | 0 | 1 | 1 | 1 |
| Pcdha2  | 0 | 0 | 0 | 0 | 1 | 0 | 0 | 0 | 1 | 1 | 1 |



|          |   |   |   |   |   |   |   |   |   |   |   |
|----------|---|---|---|---|---|---|---|---|---|---|---|
| Pcdha3   | 0 | 0 | 0 | 0 | 1 | 0 | 0 | 0 | 1 | 1 | 1 |
| Pcdha6   | 0 | 0 | 0 | 0 | 1 | 0 | 0 | 0 | 1 | 1 | 1 |
| Pcdha7   | 0 | 0 | 0 | 0 | 1 | 0 | 0 | 0 | 1 | 1 | 1 |
| Pcdha9   | 0 | 0 | 0 | 0 | 1 | 0 | 0 | 0 | 1 | 1 | 1 |
| Pcdhac1  | 0 | 0 | 0 | 0 | 1 | 0 | 0 | 0 | 1 | 1 | 1 |
| Pcdhb13  | 0 | 0 | 0 | 0 | 1 | 0 | 0 | 0 | 1 | 1 | 1 |
| Pcdhb16  | 0 | 0 | 0 | 0 | 1 | 0 | 0 | 0 | 1 | 1 | 1 |
| Pcdhb20  | 0 | 0 | 0 | 0 | 1 | 0 | 0 | 0 | 1 | 1 | 1 |
| Pcdhb22  | 0 | 0 | 0 | 0 | 1 | 0 | 0 | 0 | 1 | 1 | 1 |
| Pcdhb8   | 0 | 0 | 0 | 0 | 1 | 0 | 0 | 0 | 1 | 1 | 1 |
| Pcdhb9   | 0 | 0 | 0 | 0 | 1 | 0 | 0 | 0 | 1 | 1 | 1 |
| Pcdhga10 | 0 | 0 | 0 | 0 | 1 | 0 | 0 | 0 | 1 | 1 | 1 |
| Pcdhga5  | 0 | 0 | 0 | 0 | 1 | 0 | 0 | 0 | 1 | 1 | 1 |
| Pcdhga6  | 0 | 0 | 0 | 0 | 1 | 0 | 0 | 0 | 1 | 1 | 1 |
| Pcdhga7  | 0 | 0 | 0 | 0 | 1 | 0 | 0 | 0 | 1 | 1 | 1 |
| Pcdhgb4  | 0 | 0 | 0 | 0 | 1 | 0 | 0 | 0 | 1 | 1 | 1 |
| Pcdhgb5  | 0 | 0 | 0 | 0 | 1 | 0 | 0 | 0 | 1 | 1 | 1 |
| Pcdhgb7  | 0 | 0 | 0 | 0 | 1 | 0 | 0 | 0 | 1 | 1 | 1 |
| Pcdhgc4  | 0 | 0 | 0 | 0 | 1 | 0 | 0 | 0 | 1 | 1 | 1 |
| Pcf11    | 0 | 0 | 0 | 0 | 1 | 0 | 0 | 0 | 1 | 1 | 1 |
| Pcgf3    | 0 | 0 | 0 | 0 | 0 | 1 | 0 | 0 | 1 | 1 | 1 |
| Pcnx     | 0 | 0 | 0 | 0 | 1 | 0 | 0 | 0 | 1 | 1 | 1 |
| Pcsk1    | 0 | 0 | 0 | 0 | 1 | 0 | 0 | 0 | 1 | 1 | 1 |
| Pcsk7    | 0 | 0 | 0 | 0 | 0 | 0 | 1 | 0 | 1 | 1 | 1 |
| Pctp     | 0 | 0 | 0 | 0 | 1 | 0 | 0 | 0 | 1 | 1 | 1 |
| Pcyox1l  | 0 | 0 | 0 | 0 | 1 | 0 | 0 | 0 | 1 | 1 | 1 |
| Pcyt1a   | 0 | 0 | 0 | 0 | 1 | 0 | 0 | 0 | 1 | 1 | 1 |
| Pdcd4    | 0 | 0 | 0 | 0 | 1 | 0 | 0 | 0 | 1 | 1 | 1 |
| Pde10a   | 0 | 0 | 0 | 0 | 1 | 0 | 0 | 0 | 1 | 1 | 1 |
| Pde4dip  | 0 | 0 | 0 | 0 | 1 | 0 | 0 | 0 | 1 | 1 | 1 |
| Pde5a    | 0 | 0 | 0 | 0 | 1 | 0 | 0 | 0 | 1 | 1 | 1 |
| Pde6b    | 0 | 0 | 0 | 0 | 1 | 0 | 0 | 0 | 1 | 1 | 1 |
| Pds5a    | 0 | 0 | 0 | 0 | 1 | 0 | 0 | 0 | 1 | 1 | 1 |

|         |   |   |   |   |   |   |   |   |   |   |   |
|---------|---|---|---|---|---|---|---|---|---|---|---|
| Pdzd11  | 0 | 0 | 0 | 0 | 1 | 0 | 0 | 0 | 1 | 1 | 1 |
| Pdzd8   | 0 | 0 | 0 | 0 | 1 | 0 | 0 | 0 | 1 | 1 | 1 |
| Pemt    | 0 | 0 | 0 | 0 | 0 | 1 | 0 | 0 | 1 | 1 | 1 |
| Pepd    | 0 | 0 | 0 | 0 | 1 | 0 | 0 | 0 | 1 | 1 | 1 |
| Per1    | 0 | 0 | 0 | 0 | 1 | 0 | 0 | 0 | 1 | 1 | 1 |
| Per3    | 0 | 0 | 0 | 0 | 1 | 0 | 0 | 0 | 1 | 1 | 1 |
| Pes1    | 0 | 0 | 0 | 0 | 1 | 0 | 0 | 0 | 1 | 1 | 1 |
| Pex10   | 0 | 0 | 0 | 0 | 1 | 0 | 0 | 0 | 1 | 1 | 1 |
| Pfkp    | 0 | 0 | 0 | 0 | 0 | 0 | 1 | 0 | 1 | 1 | 1 |
| Pfn1    | 0 | 0 | 0 | 0 | 1 | 0 | 0 | 0 | 1 | 1 | 1 |
| Pgam1   | 0 | 0 | 0 | 0 | 1 | 0 | 0 | 0 | 1 | 1 | 1 |
| Pgap2   | 0 | 0 | 0 | 0 | 1 | 0 | 0 | 0 | 1 | 1 | 1 |
| Pgm211  | 0 | 0 | 0 | 0 | 0 | 1 | 0 | 0 | 1 | 1 | 1 |
| Phf3    | 0 | 0 | 0 | 0 | 1 | 0 | 0 | 0 | 1 | 1 | 1 |
| Phkb    | 0 | 0 | 0 | 0 | 0 | 0 | 1 | 0 | 1 | 1 | 1 |
| Phkg2   | 0 | 0 | 0 | 0 | 1 | 0 | 0 | 0 | 1 | 1 | 1 |
| Phlpp1  | 0 | 0 | 0 | 0 | 1 | 0 | 0 | 0 | 1 | 1 | 1 |
| Phrf1   | 0 | 0 | 0 | 0 | 1 | 0 | 0 | 0 | 1 | 1 | 1 |
| Phtf2   | 0 | 0 | 0 | 0 | 1 | 0 | 0 | 0 | 1 | 1 | 1 |
| Pi4ka   | 0 | 0 | 0 | 0 | 1 | 0 | 0 | 0 | 1 | 1 | 1 |
| Pid1    | 0 | 0 | 0 | 0 | 1 | 0 | 0 | 0 | 1 | 1 | 1 |
| Pidd1   | 0 | 0 | 0 | 0 | 1 | 0 | 0 | 0 | 1 | 1 | 1 |
| Pigm    | 0 | 0 | 0 | 0 | 1 | 0 | 0 | 0 | 1 | 1 | 1 |
| Pign    | 0 | 0 | 0 | 0 | 0 | 0 | 1 | 0 | 1 | 1 | 1 |
| Pigo    | 0 | 0 | 0 | 0 | 1 | 0 | 0 | 0 | 1 | 1 | 1 |
| Pigq    | 0 | 0 | 0 | 0 | 1 | 0 | 0 | 0 | 1 | 1 | 1 |
| Pigz    | 0 | 0 | 0 | 0 | 1 | 0 | 0 | 0 | 1 | 1 | 1 |
| Pik3c2g | 0 | 0 | 0 | 0 | 1 | 0 | 0 | 0 | 1 | 1 | 1 |
| Pim3    | 0 | 0 | 0 | 0 | 1 | 0 | 0 | 0 | 1 | 1 | 1 |
| Pip5k1a | 0 | 0 | 0 | 0 | 0 | 0 | 1 | 0 | 1 | 1 | 1 |
| Pip5k1c | 0 | 0 | 0 | 0 | 1 | 0 | 0 | 0 | 1 | 1 | 1 |
| Pirb    | 0 | 0 | 0 | 0 | 1 | 0 | 0 | 0 | 1 | 1 | 1 |
| Pitpnm3 | 0 | 0 | 0 | 0 | 1 | 0 | 0 | 0 | 1 | 1 | 1 |

|         |   |   |   |   |   |   |   |   |   |   |   |
|---------|---|---|---|---|---|---|---|---|---|---|---|
| Pkd1l3  | 0 | 0 | 0 | 0 | 1 | 0 | 0 | 0 | 1 | 1 | 1 |
| Pkdrej  | 0 | 0 | 0 | 0 | 1 | 0 | 0 | 0 | 1 | 1 | 1 |
| Pkm     | 0 | 0 | 0 | 0 | 1 | 0 | 0 | 0 | 1 | 1 | 1 |
| Pkn2    | 0 | 0 | 0 | 0 | 1 | 0 | 0 | 0 | 1 | 1 | 1 |
| Pknox2  | 0 | 0 | 0 | 0 | 1 | 0 | 0 | 0 | 1 | 1 | 1 |
| Pkp4    | 0 | 0 | 0 | 0 | 1 | 0 | 0 | 0 | 1 | 1 | 1 |
| Pla1a   | 0 | 0 | 0 | 0 | 1 | 0 | 0 | 0 | 1 | 1 | 1 |
| Pla2g4d | 0 | 0 | 0 | 0 | 1 | 0 | 0 | 0 | 1 | 1 | 1 |
| Plau    | 0 | 0 | 0 | 0 | 1 | 0 | 0 | 0 | 1 | 1 | 1 |
| Plcd3   | 0 | 0 | 0 | 0 | 1 | 0 | 0 | 0 | 1 | 1 | 1 |
| Plcg1   | 0 | 0 | 0 | 0 | 1 | 0 | 0 | 0 | 1 | 1 | 1 |
| Plch2   | 0 | 0 | 0 | 0 | 1 | 0 | 0 | 0 | 1 | 1 | 1 |
| Plcl2   | 0 | 0 | 0 | 0 | 1 | 0 | 0 | 0 | 1 | 1 | 1 |
| Plcz1   | 0 | 0 | 0 | 0 | 1 | 0 | 0 | 0 | 1 | 1 | 1 |
| Plekha8 | 0 | 0 | 0 | 0 | 1 | 0 | 0 | 0 | 1 | 1 | 1 |
| Plin4   | 0 | 0 | 0 | 0 | 1 | 0 | 0 | 0 | 1 | 1 | 1 |
| Plk3    | 0 | 0 | 0 | 0 | 1 | 0 | 0 | 0 | 1 | 1 | 1 |
| Plod3   | 0 | 0 | 0 | 0 | 1 | 0 | 0 | 0 | 1 | 1 | 1 |
| Plp1    | 0 | 0 | 0 | 0 | 1 | 0 | 0 | 0 | 1 | 1 | 1 |
| Plppr5  | 0 | 0 | 0 | 0 | 0 | 1 | 0 | 0 | 1 | 1 | 1 |
| Plxdc2  | 0 | 0 | 0 | 0 | 1 | 0 | 0 | 0 | 1 | 1 | 1 |
| Plxna4  | 0 | 0 | 0 | 0 | 1 | 0 | 0 | 0 | 1 | 1 | 1 |
| Pmch    | 0 | 0 | 0 | 0 | 1 | 0 | 0 | 0 | 1 | 1 | 1 |
| Pmepa1  | 0 | 0 | 0 | 0 | 0 | 1 | 0 | 0 | 1 | 1 | 1 |
| Pmpca   | 0 | 0 | 0 | 0 | 1 | 0 | 0 | 0 | 1 | 1 | 1 |
| Pms2    | 0 | 0 | 0 | 0 | 1 | 0 | 0 | 0 | 1 | 1 | 1 |
| Pmvk    | 0 | 0 | 0 | 0 | 1 | 0 | 0 | 0 | 1 | 1 | 1 |
| Pnkp    | 0 | 0 | 0 | 0 | 1 | 0 | 0 | 0 | 1 | 1 | 1 |
| Pnmal2  | 0 | 0 | 0 | 0 | 1 | 0 | 0 | 0 | 1 | 1 | 1 |
| Pno1    | 0 | 0 | 0 | 0 | 0 | 1 | 0 | 0 | 1 | 1 | 1 |
| Podnl1  | 0 | 0 | 0 | 0 | 1 | 0 | 0 | 0 | 1 | 1 | 1 |
| Pofut1  | 0 | 0 | 0 | 0 | 1 | 0 | 0 | 0 | 1 | 1 | 1 |
| Pogz    | 0 | 0 | 0 | 0 | 0 | 1 | 0 | 0 | 1 | 1 | 1 |

|          |   |   |   |   |   |   |   |   |   |   |   |
|----------|---|---|---|---|---|---|---|---|---|---|---|
| Pola2    | 0 | 0 | 0 | 0 | 1 | 0 | 0 | 0 | 1 | 1 | 1 |
| Poldip2  | 0 | 0 | 0 | 0 | 1 | 0 | 0 | 0 | 1 | 1 | 1 |
| Pole     | 0 | 0 | 0 | 0 | 1 | 0 | 0 | 0 | 1 | 1 | 1 |
| Pole2    | 0 | 0 | 0 | 0 | 1 | 0 | 0 | 0 | 1 | 1 | 1 |
| Poln     | 0 | 0 | 0 | 0 | 1 | 0 | 0 | 0 | 1 | 1 | 1 |
| Polr1a   | 0 | 0 | 0 | 0 | 1 | 0 | 0 | 0 | 1 | 1 | 1 |
| Polr2a   | 0 | 0 | 0 | 0 | 1 | 0 | 0 | 0 | 1 | 1 | 1 |
| Polr2d   | 0 | 0 | 0 | 0 | 1 | 0 | 0 | 0 | 1 | 1 | 1 |
| Polr3e   | 0 | 0 | 0 | 0 | 1 | 0 | 0 | 0 | 1 | 1 | 1 |
| Pop7     | 0 | 0 | 0 | 0 | 1 | 0 | 0 | 0 | 1 | 1 | 1 |
| Por      | 0 | 0 | 0 | 0 | 1 | 0 | 0 | 0 | 1 | 1 | 1 |
| Pot1b    | 0 | 0 | 0 | 0 | 1 | 0 | 0 | 0 | 1 | 1 | 1 |
| Pou4f1   | 0 | 0 | 0 | 0 | 1 | 0 | 0 | 0 | 1 | 1 | 1 |
| Ppa1     | 0 | 0 | 0 | 0 | 1 | 0 | 0 | 0 | 1 | 1 | 1 |
| Ppat     | 0 | 0 | 0 | 0 | 1 | 0 | 0 | 0 | 1 | 1 | 1 |
| Ppfia1   | 0 | 0 | 0 | 0 | 1 | 0 | 0 | 0 | 1 | 1 | 1 |
| Ppfia3   | 0 | 0 | 0 | 0 | 1 | 0 | 0 | 0 | 1 | 1 | 1 |
| Ppfibp1  | 0 | 0 | 0 | 0 | 1 | 0 | 0 | 0 | 1 | 1 | 1 |
| Ppfibp2  | 0 | 0 | 0 | 0 | 1 | 0 | 0 | 0 | 1 | 1 | 1 |
| Ppie     | 0 | 0 | 0 | 0 | 1 | 0 | 0 | 0 | 1 | 1 | 1 |
| Ppm1b    | 0 | 0 | 0 | 0 | 1 | 0 | 0 | 0 | 1 | 1 | 1 |
| Ppp1cb   | 0 | 0 | 0 | 0 | 1 | 0 | 0 | 0 | 1 | 1 | 1 |
| Ppp1r10  | 0 | 0 | 0 | 0 | 1 | 0 | 0 | 0 | 1 | 1 | 1 |
| Ppp1r12b | 0 | 0 | 0 | 0 | 0 | 0 | 1 | 0 | 1 | 1 | 1 |
| Ppp1r16b | 0 | 0 | 0 | 0 | 1 | 0 | 0 | 0 | 1 | 1 | 1 |
| Ppp1r1a  | 0 | 0 | 0 | 0 | 1 | 0 | 0 | 0 | 1 | 1 | 1 |
| Ppp1r26  | 0 | 0 | 0 | 0 | 1 | 0 | 0 | 0 | 1 | 1 | 1 |
| Ppp1r37  | 0 | 0 | 0 | 0 | 1 | 0 | 0 | 0 | 1 | 1 | 1 |
| Ppp1r3a  | 0 | 0 | 0 | 0 | 1 | 0 | 0 | 0 | 1 | 1 | 1 |
| Ppp1r42  | 0 | 0 | 0 | 0 | 1 | 0 | 0 | 0 | 1 | 1 | 1 |
| Ppp2r1b  | 0 | 0 | 0 | 0 | 1 | 0 | 0 | 0 | 1 | 1 | 1 |
| Ppp4r3a  | 0 | 0 | 0 | 0 | 1 | 0 | 0 | 0 | 1 | 1 | 1 |
| Ppp4r4   | 0 | 0 | 0 | 0 | 1 | 0 | 0 | 0 | 1 | 1 | 1 |

|         |   |   |   |   |   |   |   |   |   |   |   |
|---------|---|---|---|---|---|---|---|---|---|---|---|
| Ppp6r1  | 0 | 0 | 0 | 0 | 1 | 0 | 0 | 0 | 1 | 1 | 1 |
| Pramel6 | 0 | 0 | 0 | 0 | 0 | 0 | 1 | 0 | 1 | 1 | 1 |
| Prb1    | 0 | 0 | 0 | 0 | 1 | 0 | 0 | 0 | 1 | 1 | 1 |
| Prcp    | 0 | 0 | 0 | 0 | 1 | 0 | 0 | 0 | 1 | 1 | 1 |
| Prdm12  | 0 | 0 | 0 | 0 | 1 | 0 | 0 | 0 | 1 | 1 | 1 |
| Prdm16  | 0 | 0 | 0 | 0 | 1 | 0 | 0 | 0 | 1 | 1 | 1 |
| Prdm2   | 0 | 0 | 0 | 0 | 0 | 0 | 1 | 0 | 1 | 1 | 1 |
| Prdx3   | 0 | 0 | 0 | 0 | 1 | 0 | 0 | 0 | 1 | 1 | 1 |
| Prg3    | 0 | 0 | 0 | 0 | 0 | 0 | 1 | 0 | 1 | 1 | 1 |
| Prim1   | 0 | 0 | 0 | 0 | 1 | 0 | 0 | 0 | 1 | 1 | 1 |
| Prkaa1  | 0 | 0 | 0 | 0 | 1 | 0 | 0 | 0 | 1 | 1 | 1 |
| Prkab2  | 0 | 0 | 0 | 0 | 1 | 0 | 0 | 0 | 1 | 1 | 1 |
| Prkci   | 0 | 0 | 0 | 0 | 1 | 0 | 0 | 0 | 1 | 1 | 1 |
| Prkcsh  | 0 | 0 | 0 | 0 | 1 | 0 | 0 | 0 | 1 | 1 | 1 |
| Prkd3   | 0 | 0 | 0 | 0 | 0 | 0 | 1 | 0 | 1 | 1 | 1 |
| Prmt3   | 0 | 0 | 0 | 0 | 1 | 0 | 0 | 0 | 1 | 1 | 1 |
| Prob1   | 0 | 0 | 0 | 0 | 1 | 0 | 0 | 0 | 1 | 1 | 1 |
| Prokr2  | 0 | 0 | 0 | 0 | 1 | 0 | 0 | 0 | 1 | 1 | 1 |
| Prox1   | 0 | 0 | 0 | 0 | 1 | 0 | 0 | 0 | 1 | 1 | 1 |
| Prox2   | 0 | 0 | 0 | 0 | 1 | 0 | 0 | 0 | 1 | 1 | 1 |
| Prpf4   | 0 | 0 | 0 | 0 | 1 | 0 | 0 | 0 | 1 | 1 | 1 |
| Prr11   | 0 | 0 | 0 | 0 | 1 | 0 | 0 | 0 | 1 | 1 | 1 |
| Prr19   | 0 | 0 | 0 | 0 | 1 | 0 | 0 | 0 | 1 | 1 | 1 |
| Prr23a1 | 0 | 0 | 0 | 0 | 1 | 0 | 0 | 0 | 1 | 1 | 1 |
| Prr5    | 0 | 0 | 0 | 0 | 1 | 0 | 0 | 0 | 1 | 1 | 1 |
| Prrc1   | 0 | 0 | 0 | 0 | 1 | 0 | 0 | 0 | 1 | 1 | 1 |
| Prrg4   | 0 | 0 | 0 | 0 | 1 | 0 | 0 | 0 | 1 | 1 | 1 |
| Prss29  | 0 | 0 | 0 | 0 | 1 | 0 | 0 | 0 | 1 | 1 | 1 |
| Prss35  | 0 | 0 | 0 | 0 | 1 | 0 | 0 | 0 | 1 | 1 | 1 |
| Prss46  | 0 | 0 | 0 | 0 | 1 | 0 | 0 | 0 | 1 | 1 | 1 |
| Prtg    | 0 | 0 | 0 | 0 | 1 | 0 | 0 | 0 | 1 | 1 | 1 |
| Psapl1  | 0 | 0 | 0 | 0 | 1 | 0 | 0 | 0 | 1 | 1 | 1 |
| Psd3    | 0 | 0 | 0 | 0 | 1 | 0 | 0 | 0 | 1 | 1 | 1 |

|        |   |   |   |   |   |   |   |   |   |   |   |
|--------|---|---|---|---|---|---|---|---|---|---|---|
| Psg25  | 0 | 0 | 0 | 0 | 1 | 0 | 0 | 0 | 1 | 1 | 1 |
| Psg26  | 0 | 0 | 0 | 0 | 1 | 0 | 0 | 0 | 1 | 1 | 1 |
| Psg28  | 0 | 0 | 0 | 0 | 1 | 0 | 0 | 0 | 1 | 1 | 1 |
| Psma5  | 0 | 0 | 0 | 0 | 1 | 0 | 0 | 0 | 1 | 1 | 1 |
| Psma8  | 0 | 0 | 0 | 0 | 1 | 0 | 0 | 0 | 1 | 1 | 1 |
| Psmc5  | 0 | 0 | 0 | 0 | 0 | 0 | 1 | 0 | 1 | 1 | 1 |
| Psme3  | 0 | 0 | 0 | 0 | 0 | 0 | 1 | 0 | 1 | 1 | 1 |
| Ptbp3  | 0 | 0 | 0 | 0 | 1 | 0 | 0 | 0 | 1 | 1 | 1 |
| Ptger3 | 0 | 0 | 0 | 0 | 1 | 0 | 0 | 0 | 1 | 1 | 1 |
| Pth1r  | 0 | 0 | 0 | 0 | 1 | 0 | 0 | 0 | 1 | 1 | 1 |
| Ptpdc1 | 0 | 0 | 0 | 0 | 1 | 0 | 0 | 0 | 1 | 1 | 1 |
| Ptpn13 | 0 | 0 | 0 | 0 | 1 | 0 | 0 | 0 | 1 | 1 | 1 |
| Ptpn22 | 0 | 0 | 0 | 0 | 1 | 0 | 0 | 0 | 1 | 1 | 1 |
| Ptpn23 | 0 | 0 | 0 | 0 | 1 | 0 | 0 | 0 | 1 | 1 | 1 |
| Ptpn5  | 0 | 0 | 0 | 0 | 0 | 1 | 0 | 0 | 1 | 1 | 1 |
| Ptpn6  | 0 | 0 | 0 | 0 | 1 | 0 | 0 | 0 | 1 | 1 | 1 |
| Ptprg  | 0 | 0 | 0 | 0 | 1 | 0 | 0 | 0 | 1 | 1 | 1 |
| Ptprn  | 0 | 0 | 0 | 0 | 1 | 0 | 0 | 0 | 1 | 1 | 1 |
| Ptprn2 | 0 | 0 | 0 | 0 | 1 | 0 | 0 | 0 | 1 | 1 | 1 |
| Ptpr   | 0 | 0 | 0 | 0 | 1 | 0 | 0 | 0 | 1 | 1 | 1 |
| Ptpru  | 0 | 0 | 0 | 0 | 1 | 0 | 0 | 0 | 1 | 1 | 1 |
| Pudp   | 0 | 0 | 0 | 0 | 1 | 0 | 0 | 0 | 1 | 1 | 1 |
| Pum3   | 0 | 0 | 0 | 0 | 1 | 0 | 0 | 0 | 1 | 1 | 1 |
| Purg   | 0 | 0 | 0 | 0 | 1 | 0 | 0 | 0 | 1 | 1 | 1 |
| Pus3   | 0 | 0 | 0 | 0 | 1 | 0 | 0 | 0 | 1 | 1 | 1 |
| Pus7   | 0 | 0 | 0 | 0 | 1 | 0 | 0 | 0 | 1 | 1 | 1 |
| Pxdc1  | 0 | 0 | 0 | 0 | 1 | 0 | 0 | 0 | 1 | 1 | 1 |
| Pxmp2  | 0 | 0 | 0 | 0 | 1 | 0 | 0 | 0 | 1 | 1 | 1 |
| Pycr1  | 0 | 0 | 0 | 0 | 1 | 0 | 0 | 0 | 1 | 1 | 1 |
| Pygm   | 0 | 0 | 0 | 0 | 1 | 0 | 0 | 0 | 1 | 1 | 1 |
| Qrsl1  | 0 | 0 | 0 | 0 | 1 | 0 | 0 | 0 | 1 | 1 | 1 |
| Qsox1  | 0 | 0 | 0 | 0 | 0 | 1 | 0 | 0 | 1 | 1 | 1 |
| R3hdm1 | 0 | 0 | 0 | 0 | 1 | 0 | 0 | 0 | 1 | 1 | 1 |

|           |   |   |   |   |   |   |   |   |   |   |   |
|-----------|---|---|---|---|---|---|---|---|---|---|---|
| Rab11fip1 | 0 | 0 | 0 | 0 | 1 | 0 | 0 | 0 | 1 | 1 | 1 |
| Rab11fip5 | 0 | 0 | 0 | 0 | 1 | 0 | 0 | 0 | 1 | 1 | 1 |
| Rab3a     | 0 | 0 | 0 | 0 | 0 | 1 | 0 | 0 | 1 | 1 | 1 |
| Rabac1    | 0 | 0 | 0 | 0 | 1 | 0 | 0 | 0 | 1 | 1 | 1 |
| Rabep1    | 0 | 0 | 0 | 0 | 1 | 0 | 0 | 0 | 1 | 1 | 1 |
| Rabgap1   | 1 | 0 | 0 | 0 | 0 | 0 | 0 | 0 | 1 | 1 | 1 |
| Rad50     | 0 | 0 | 0 | 0 | 1 | 0 | 0 | 0 | 1 | 1 | 1 |
| Rad54b    | 0 | 0 | 0 | 0 | 1 | 0 | 0 | 0 | 1 | 1 | 1 |
| Radil     | 0 | 0 | 0 | 0 | 1 | 0 | 0 | 0 | 1 | 1 | 1 |
| Rag1      | 0 | 0 | 0 | 0 | 1 | 0 | 0 | 0 | 1 | 1 | 1 |
| Ralgapa2  | 0 | 0 | 0 | 0 | 1 | 0 | 0 | 0 | 1 | 1 | 1 |
| Ralgapb   | 0 | 0 | 0 | 0 | 1 | 0 | 0 | 0 | 1 | 1 | 1 |
| Ralgps1   | 0 | 0 | 0 | 0 | 1 | 0 | 0 | 0 | 1 | 1 | 1 |
| Ran       | 0 | 0 | 0 | 0 | 1 | 0 | 0 | 0 | 1 | 1 | 1 |
| Rapgef2   | 0 | 0 | 0 | 0 | 1 | 0 | 0 | 0 | 1 | 1 | 1 |
| Rapgef3   | 1 | 0 | 0 | 0 | 0 | 0 | 0 | 0 | 1 | 1 | 1 |
| Rapgef11  | 0 | 0 | 0 | 0 | 1 | 0 | 0 | 0 | 1 | 1 | 1 |
| Rasa2     | 0 | 0 | 0 | 0 | 1 | 0 | 0 | 0 | 1 | 1 | 1 |
| Rasal1    | 0 | 0 | 0 | 0 | 1 | 0 | 0 | 0 | 1 | 1 | 1 |
| Rasal2    | 0 | 0 | 0 | 0 | 1 | 0 | 0 | 0 | 1 | 1 | 1 |
| Rasef     | 0 | 0 | 0 | 0 | 1 | 0 | 0 | 0 | 1 | 1 | 1 |
| Rasgef1b  | 0 | 0 | 0 | 0 | 1 | 0 | 0 | 0 | 1 | 1 | 1 |
| Rasgrf2   | 0 | 0 | 0 | 0 | 1 | 0 | 0 | 0 | 1 | 1 | 1 |
| Rassf10   | 0 | 0 | 0 | 0 | 1 | 0 | 0 | 0 | 1 | 1 | 1 |
| Rassf6    | 0 | 0 | 0 | 0 | 1 | 0 | 0 | 0 | 1 | 1 | 1 |
| Rb1cc1    | 0 | 0 | 0 | 0 | 1 | 0 | 0 | 0 | 1 | 1 | 1 |
| Rbbp4     | 0 | 0 | 0 | 0 | 1 | 0 | 0 | 0 | 1 | 1 | 1 |
| Rbbp6     | 0 | 0 | 0 | 0 | 1 | 0 | 0 | 0 | 1 | 1 | 1 |
| Rbl1      | 0 | 0 | 0 | 0 | 1 | 0 | 0 | 0 | 1 | 1 | 1 |
| Rbm12b1   | 0 | 0 | 0 | 0 | 1 | 0 | 0 | 0 | 1 | 1 | 1 |
| Rbm12b2   | 0 | 0 | 0 | 0 | 1 | 0 | 0 | 0 | 1 | 1 | 1 |
| Rbm15b    | 0 | 0 | 0 | 0 | 1 | 0 | 0 | 0 | 1 | 1 | 1 |
| Rbm17     | 0 | 0 | 0 | 0 | 1 | 0 | 0 | 0 | 1 | 1 | 1 |

|         |   |   |   |   |   |   |   |   |   |   |   |
|---------|---|---|---|---|---|---|---|---|---|---|---|
| Rbm39   | 0 | 0 | 0 | 0 | 0 | 0 | 1 | 0 | 1 | 1 | 1 |
| Rbm4    | 0 | 0 | 0 | 0 | 1 | 0 | 0 | 0 | 1 | 1 | 1 |
| Rbm42   | 0 | 0 | 0 | 0 | 1 | 0 | 0 | 0 | 1 | 1 | 1 |
| Rbm6    | 0 | 0 | 0 | 0 | 1 | 0 | 0 | 0 | 1 | 1 | 1 |
| Rbm7    | 0 | 0 | 0 | 0 | 1 | 0 | 0 | 0 | 1 | 1 | 1 |
| Rbpj    | 0 | 0 | 0 | 0 | 1 | 0 | 0 | 0 | 1 | 1 | 1 |
| Rc3h2   | 0 | 0 | 0 | 0 | 1 | 0 | 0 | 0 | 1 | 1 | 1 |
| Rchy1   | 0 | 0 | 0 | 0 | 1 | 0 | 0 | 0 | 1 | 1 | 1 |
| Rcn2    | 0 | 0 | 0 | 0 | 1 | 0 | 0 | 0 | 1 | 1 | 1 |
| Rdh11   | 0 | 0 | 0 | 0 | 1 | 0 | 0 | 0 | 1 | 1 | 1 |
| Rec8    | 0 | 0 | 0 | 0 | 1 | 0 | 0 | 0 | 1 | 1 | 1 |
| Recql4  | 0 | 0 | 0 | 0 | 1 | 0 | 0 | 0 | 1 | 1 | 1 |
| Reln    | 0 | 0 | 0 | 0 | 1 | 0 | 0 | 0 | 1 | 1 | 1 |
| Rergl   | 0 | 0 | 0 | 0 | 1 | 0 | 0 | 0 | 1 | 1 | 1 |
| Ret     | 0 | 0 | 0 | 0 | 1 | 0 | 0 | 0 | 1 | 1 | 1 |
| Retn    | 0 | 0 | 0 | 0 | 1 | 0 | 0 | 0 | 1 | 1 | 1 |
| Rev3l   | 0 | 0 | 0 | 0 | 0 | 1 | 0 | 0 | 1 | 1 | 1 |
| Rfc2    | 0 | 0 | 0 | 0 | 1 | 0 | 0 | 0 | 1 | 1 | 1 |
| Rfx2    | 0 | 0 | 0 | 0 | 1 | 0 | 0 | 0 | 1 | 1 | 1 |
| Rfx6    | 0 | 0 | 0 | 0 | 1 | 0 | 0 | 0 | 1 | 1 | 1 |
| Rfxank  | 0 | 0 | 0 | 0 | 1 | 0 | 0 | 0 | 1 | 1 | 1 |
| Rgl1    | 0 | 0 | 0 | 0 | 1 | 0 | 0 | 0 | 1 | 1 | 1 |
| Rgmb    | 0 | 0 | 0 | 0 | 1 | 0 | 0 | 0 | 1 | 1 | 1 |
| Rgs11   | 0 | 0 | 0 | 0 | 1 | 0 | 0 | 0 | 1 | 1 | 1 |
| Rgs9    | 0 | 0 | 0 | 0 | 1 | 0 | 0 | 0 | 1 | 1 | 1 |
| Rhbdf2  | 0 | 0 | 0 | 0 | 1 | 0 | 0 | 0 | 1 | 1 | 1 |
| Rhbg    | 0 | 0 | 0 | 0 | 1 | 0 | 0 | 0 | 1 | 1 | 1 |
| Rhd     | 0 | 0 | 0 | 0 | 1 | 0 | 0 | 0 | 1 | 1 | 1 |
| Rhoa    | 0 | 0 | 0 | 0 | 1 | 0 | 0 | 0 | 1 | 1 | 1 |
| Rhobtb2 | 0 | 0 | 0 | 0 | 1 | 0 | 0 | 0 | 1 | 1 | 1 |
| Rhog    | 0 | 0 | 0 | 0 | 1 | 0 | 0 | 0 | 1 | 1 | 1 |
| Rhot1   | 0 | 0 | 0 | 0 | 1 | 0 | 0 | 0 | 1 | 1 | 1 |
| Rhox2d  | 0 | 0 | 0 | 0 | 1 | 0 | 0 | 0 | 1 | 1 | 1 |



|          |   |   |   |   |   |   |   |   |   |   |   |
|----------|---|---|---|---|---|---|---|---|---|---|---|
| Rhox3f   | 0 | 0 | 0 | 0 | 1 | 0 | 0 | 0 | 1 | 1 | 1 |
| Ribc2    | 0 | 0 | 0 | 0 | 1 | 0 | 0 | 0 | 1 | 1 | 1 |
| Ric1     | 0 | 0 | 0 | 0 | 1 | 0 | 0 | 0 | 1 | 1 | 1 |
| Ric8b    | 0 | 0 | 0 | 0 | 1 | 0 | 0 | 0 | 1 | 1 | 1 |
| Rif1     | 0 | 0 | 0 | 0 | 1 | 0 | 0 | 0 | 1 | 1 | 1 |
| Rims2    | 0 | 0 | 0 | 0 | 1 | 0 | 0 | 0 | 1 | 1 | 1 |
| Riox2    | 0 | 0 | 0 | 0 | 1 | 0 | 0 | 0 | 1 | 1 | 1 |
| Ripk1    | 0 | 0 | 0 | 0 | 1 | 0 | 0 | 0 | 1 | 1 | 1 |
| Rit1     | 0 | 0 | 0 | 0 | 1 | 0 | 0 | 0 | 1 | 1 | 1 |
| Rnaseh2b | 0 | 0 | 0 | 0 | 1 | 0 | 0 | 0 | 1 | 1 | 1 |
| Rnf114   | 0 | 0 | 0 | 0 | 1 | 0 | 0 | 0 | 1 | 1 | 1 |
| Rnf123   | 0 | 0 | 0 | 0 | 1 | 0 | 0 | 0 | 1 | 1 | 1 |
| Rnf144b  | 0 | 0 | 0 | 0 | 1 | 0 | 0 | 0 | 1 | 1 | 1 |
| Rnf152   | 0 | 0 | 0 | 0 | 1 | 0 | 0 | 0 | 1 | 1 | 1 |
| Rnf167   | 0 | 0 | 0 | 0 | 1 | 0 | 0 | 0 | 1 | 1 | 1 |
| Rnf214   | 0 | 0 | 0 | 0 | 0 | 1 | 0 | 0 | 1 | 1 | 1 |
| Rnf32    | 0 | 0 | 0 | 0 | 0 | 0 | 1 | 0 | 1 | 1 | 1 |
| Rnf8     | 0 | 0 | 0 | 0 | 1 | 0 | 0 | 0 | 1 | 1 | 1 |
| Rngtt    | 0 | 0 | 0 | 0 | 1 | 0 | 0 | 0 | 1 | 1 | 1 |
| Rnpc3    | 0 | 0 | 0 | 0 | 1 | 0 | 0 | 0 | 1 | 1 | 1 |
| Rnpepl1  | 0 | 0 | 0 | 0 | 1 | 0 | 0 | 0 | 1 | 1 | 1 |
| Robo3    | 0 | 0 | 0 | 0 | 1 | 0 | 0 | 0 | 1 | 1 | 1 |
| Ror2     | 0 | 0 | 0 | 0 | 1 | 0 | 0 | 0 | 1 | 1 | 1 |
| Rp1      | 0 | 0 | 0 | 0 | 1 | 0 | 0 | 0 | 1 | 1 | 1 |
| Rpap2    | 0 | 0 | 0 | 0 | 1 | 0 | 0 | 0 | 1 | 1 | 1 |
| Rpgrip1  | 0 | 0 | 0 | 0 | 1 | 0 | 0 | 0 | 1 | 1 | 1 |
| Rph3a    | 0 | 0 | 0 | 0 | 1 | 0 | 0 | 0 | 1 | 1 | 1 |
| Rpl19    | 0 | 0 | 0 | 0 | 1 | 0 | 0 | 0 | 1 | 1 | 1 |
| Rpl23    | 0 | 0 | 0 | 0 | 1 | 0 | 0 | 0 | 1 | 1 | 1 |
| Rpl5     | 0 | 0 | 0 | 0 | 1 | 0 | 0 | 0 | 1 | 1 | 1 |
| Rprd2    | 0 | 0 | 0 | 0 | 1 | 0 | 0 | 0 | 1 | 1 | 1 |
| Rps29    | 0 | 0 | 0 | 0 | 1 | 0 | 0 | 0 | 1 | 1 | 1 |
| Rps3     | 0 | 0 | 0 | 0 | 1 | 0 | 0 | 0 | 1 | 1 | 1 |

|          |   |   |   |   |   |   |   |   |   |   |   |
|----------|---|---|---|---|---|---|---|---|---|---|---|
| Rps6kc1  | 0 | 0 | 0 | 0 | 1 | 0 | 0 | 0 | 1 | 1 | 1 |
| Rps7     | 0 | 0 | 0 | 0 | 1 | 0 | 0 | 0 | 1 | 1 | 1 |
| Rps8     | 0 | 0 | 0 | 0 | 1 | 0 | 0 | 0 | 1 | 1 | 1 |
| Rptn     | 0 | 0 | 0 | 0 | 1 | 0 | 0 | 0 | 1 | 1 | 1 |
| Rptor    | 0 | 0 | 0 | 0 | 0 | 0 | 1 | 0 | 1 | 1 | 1 |
| Rpusd3   | 0 | 0 | 0 | 0 | 1 | 0 | 0 | 0 | 1 | 1 | 1 |
| Rrbp1    | 0 | 0 | 0 | 0 | 1 | 0 | 0 | 0 | 1 | 1 | 1 |
| Rrs1     | 0 | 0 | 0 | 0 | 1 | 0 | 0 | 0 | 1 | 1 | 1 |
| Rsad2    | 0 | 0 | 0 | 0 | 1 | 0 | 0 | 0 | 1 | 1 | 1 |
| Rslcan18 | 0 | 0 | 0 | 0 | 0 | 0 | 1 | 0 | 1 | 1 | 1 |
| Rspo3    | 0 | 0 | 0 | 0 | 1 | 0 | 0 | 0 | 1 | 1 | 1 |
| Rtn3     | 0 | 0 | 0 | 0 | 1 | 0 | 0 | 0 | 1 | 1 | 1 |
| Rtn4     | 0 | 0 | 0 | 0 | 1 | 0 | 0 | 0 | 1 | 1 | 1 |
| Rubcn    | 0 | 0 | 0 | 0 | 1 | 0 | 0 | 0 | 1 | 1 | 1 |
| Ryk      | 0 | 0 | 0 | 0 | 1 | 0 | 0 | 0 | 1 | 1 | 1 |
| S1pr2    | 0 | 0 | 0 | 0 | 0 | 0 | 1 | 0 | 1 | 1 | 1 |
| Sac3d1   | 0 | 0 | 0 | 0 | 1 | 0 | 0 | 0 | 1 | 1 | 1 |
| Sacs     | 0 | 0 | 0 | 0 | 1 | 0 | 0 | 0 | 1 | 1 | 1 |
| Sall2    | 0 | 0 | 0 | 0 | 1 | 0 | 0 | 0 | 1 | 1 | 1 |
| Samd10   | 0 | 0 | 0 | 0 | 0 | 1 | 0 | 0 | 1 | 1 | 1 |
| Samd3    | 0 | 0 | 0 | 0 | 1 | 0 | 0 | 0 | 1 | 1 | 1 |
| Samd4    | 0 | 0 | 0 | 0 | 1 | 0 | 0 | 0 | 1 | 1 | 1 |
| Samd7    | 0 | 0 | 0 | 0 | 1 | 0 | 0 | 0 | 1 | 1 | 1 |
| Sap18b   | 0 | 0 | 0 | 0 | 1 | 0 | 0 | 0 | 1 | 1 | 1 |
| Sardh    | 0 | 0 | 0 | 0 | 1 | 0 | 0 | 0 | 1 | 1 | 1 |
| Sarm1    | 0 | 0 | 0 | 0 | 1 | 0 | 0 | 0 | 1 | 1 | 1 |
| Sart3    | 0 | 0 | 0 | 0 | 1 | 0 | 0 | 0 | 1 | 1 | 1 |
| Sass6    | 0 | 0 | 0 | 0 | 1 | 0 | 0 | 0 | 1 | 1 | 1 |
| Satb2    | 0 | 0 | 0 | 0 | 1 | 0 | 0 | 0 | 1 | 1 | 1 |
| Sbds     | 0 | 0 | 0 | 0 | 1 | 0 | 0 | 0 | 1 | 1 | 1 |
| Sbf1     | 0 | 0 | 0 | 0 | 1 | 0 | 0 | 0 | 1 | 1 | 1 |
| Sbf2     | 0 | 0 | 0 | 0 | 1 | 0 | 0 | 0 | 1 | 1 | 1 |
| Sbk1     | 0 | 0 | 0 | 0 | 1 | 0 | 0 | 0 | 1 | 1 | 1 |

|           |   |   |   |   |   |   |   |   |   |   |   |
|-----------|---|---|---|---|---|---|---|---|---|---|---|
| Sbk2      | 0 | 0 | 0 | 0 | 1 | 0 | 0 | 0 | 1 | 1 | 1 |
| Sbsn      | 0 | 0 | 0 | 0 | 1 | 0 | 0 | 0 | 1 | 1 | 1 |
| Scaf11    | 0 | 0 | 0 | 0 | 1 | 0 | 0 | 0 | 1 | 1 | 1 |
| Scaf4     | 0 | 0 | 0 | 0 | 1 | 0 | 0 | 0 | 1 | 1 | 1 |
| Scamp3    | 0 | 0 | 0 | 0 | 1 | 0 | 0 | 0 | 1 | 1 | 1 |
| Scamp4    | 0 | 0 | 0 | 0 | 1 | 0 | 0 | 0 | 1 | 1 | 1 |
| Scamp5    | 0 | 0 | 0 | 0 | 1 | 0 | 0 | 0 | 1 | 1 | 1 |
| Scd2      | 0 | 0 | 0 | 0 | 1 | 0 | 0 | 0 | 1 | 1 | 1 |
| Scly      | 0 | 0 | 0 | 0 | 1 | 0 | 0 | 0 | 1 | 1 | 1 |
| Scn10a    | 0 | 0 | 0 | 0 | 0 | 1 | 0 | 0 | 1 | 1 | 1 |
| Scn3a     | 0 | 0 | 0 | 0 | 1 | 0 | 0 | 0 | 1 | 1 | 1 |
| Scn5a     | 0 | 0 | 0 | 0 | 1 | 0 | 0 | 0 | 1 | 1 | 1 |
| Scn8a     | 0 | 0 | 0 | 0 | 1 | 0 | 0 | 0 | 1 | 1 | 1 |
| Scnn1a    | 0 | 0 | 0 | 0 | 1 | 0 | 0 | 0 | 1 | 1 | 1 |
| Sdc3      | 0 | 0 | 0 | 0 | 1 | 0 | 0 | 0 | 1 | 1 | 1 |
| Sde2      | 0 | 0 | 0 | 0 | 1 | 0 | 0 | 0 | 1 | 1 | 1 |
| Sdk2      | 0 | 0 | 0 | 0 | 1 | 0 | 0 | 0 | 1 | 1 | 1 |
| Sdsl      | 0 | 0 | 0 | 0 | 1 | 0 | 0 | 0 | 1 | 1 | 1 |
| Sec14l5   | 0 | 0 | 0 | 0 | 1 | 0 | 0 | 0 | 1 | 1 | 1 |
| Sec16b    | 0 | 0 | 0 | 0 | 1 | 0 | 0 | 0 | 1 | 1 | 1 |
| Sec24b    | 0 | 0 | 0 | 0 | 0 | 1 | 0 | 0 | 1 | 1 | 1 |
| Sec31b    | 0 | 0 | 0 | 0 | 1 | 0 | 0 | 0 | 1 | 1 | 1 |
| Sec63     | 0 | 0 | 0 | 0 | 0 | 1 | 0 | 0 | 1 | 1 | 1 |
| Secisbp2l | 0 | 0 | 0 | 0 | 1 | 0 | 0 | 0 | 1 | 1 | 1 |
| Selenov   | 0 | 0 | 0 | 0 | 1 | 0 | 0 | 0 | 1 | 1 | 1 |
| Selp      | 0 | 0 | 0 | 0 | 1 | 0 | 0 | 0 | 1 | 1 | 1 |
| Selpg     | 0 | 0 | 0 | 0 | 1 | 0 | 0 | 0 | 1 | 1 | 1 |
| Sema3b    | 0 | 0 | 0 | 0 | 1 | 0 | 0 | 0 | 1 | 1 | 1 |
| Sema3c    | 0 | 0 | 0 | 0 | 1 | 0 | 0 | 0 | 1 | 1 | 1 |
| Sema3g    | 0 | 0 | 0 | 0 | 1 | 0 | 0 | 0 | 1 | 1 | 1 |
| Sema4f    | 0 | 0 | 0 | 0 | 1 | 0 | 0 | 0 | 1 | 1 | 1 |
| Sema5b    | 0 | 0 | 0 | 0 | 1 | 0 | 0 | 0 | 1 | 1 | 1 |
| Sema6a    | 0 | 0 | 0 | 0 | 1 | 0 | 0 | 0 | 1 | 1 | 1 |

|           |   |   |   |   |   |   |   |   |   |   |   |
|-----------|---|---|---|---|---|---|---|---|---|---|---|
| Senp5     | 0 | 0 | 0 | 0 | 1 | 0 | 0 | 0 | 1 | 1 | 1 |
| Senp8     | 0 | 0 | 0 | 0 | 1 | 0 | 0 | 0 | 1 | 1 | 1 |
| Serbp1    | 0 | 0 | 0 | 0 | 0 | 0 | 1 | 0 | 1 | 1 | 1 |
| Serpina11 | 0 | 0 | 0 | 0 | 1 | 0 | 0 | 0 | 1 | 1 | 1 |
| Serpina1e | 0 | 0 | 1 | 0 | 0 | 0 | 0 | 0 | 1 | 1 | 1 |
| Serpina7  | 0 | 0 | 0 | 0 | 1 | 0 | 0 | 0 | 1 | 1 | 1 |
| Serpinb11 | 0 | 0 | 0 | 0 | 1 | 0 | 0 | 0 | 1 | 1 | 1 |
| Serpinb13 | 0 | 0 | 0 | 0 | 1 | 0 | 0 | 0 | 1 | 1 | 1 |
| Serpinb3c | 0 | 0 | 0 | 0 | 1 | 0 | 0 | 0 | 1 | 1 | 1 |
| Serpinb3d | 0 | 0 | 0 | 0 | 1 | 0 | 0 | 0 | 1 | 1 | 1 |
| Serpinb6e | 0 | 0 | 0 | 0 | 1 | 0 | 0 | 0 | 1 | 1 | 1 |
| Serpinb9b | 0 | 0 | 0 | 0 | 1 | 0 | 0 | 0 | 1 | 1 | 1 |
| Serpinh1  | 0 | 0 | 0 | 0 | 1 | 0 | 0 | 0 | 1 | 1 | 1 |
| Serpini2  | 0 | 0 | 0 | 0 | 1 | 0 | 0 | 0 | 1 | 1 | 1 |
| Setd1b    | 0 | 0 | 0 | 0 | 1 | 0 | 0 | 0 | 1 | 1 | 1 |
| Setd5     | 0 | 0 | 0 | 0 | 1 | 0 | 0 | 0 | 1 | 1 | 1 |
| Sfmbt2    | 0 | 0 | 0 | 0 | 0 | 1 | 0 | 0 | 1 | 1 | 1 |
| Sfswap    | 0 | 0 | 0 | 0 | 1 | 0 | 0 | 0 | 1 | 1 | 1 |
| Sgpl1     | 0 | 0 | 0 | 0 | 0 | 0 | 1 | 0 | 1 | 1 | 1 |
| Sgsm3     | 0 | 0 | 0 | 0 | 0 | 0 | 1 | 0 | 1 | 1 | 1 |
| Sh2b2     | 0 | 0 | 0 | 0 | 1 | 0 | 0 | 0 | 1 | 1 | 1 |
| Sh2b3     | 0 | 0 | 0 | 0 | 1 | 0 | 0 | 0 | 1 | 1 | 1 |
| Sh2d2a    | 0 | 0 | 0 | 0 | 0 | 0 | 1 | 0 | 1 | 1 | 1 |
| Sh3bp4    | 0 | 0 | 0 | 0 | 1 | 0 | 0 | 0 | 1 | 1 | 1 |
| Sh3rf2    | 0 | 0 | 0 | 0 | 1 | 0 | 0 | 0 | 1 | 1 | 1 |
| Sh3tc1    | 0 | 0 | 0 | 0 | 1 | 0 | 0 | 0 | 1 | 1 | 1 |
| Sh3yl1    | 0 | 0 | 0 | 0 | 1 | 0 | 0 | 0 | 1 | 1 | 1 |
| Shbg      | 0 | 0 | 0 | 0 | 1 | 0 | 0 | 0 | 1 | 1 | 1 |
| Shkbp1    | 0 | 0 | 0 | 0 | 1 | 0 | 0 | 0 | 1 | 1 | 1 |
| Shroom3   | 0 | 0 | 0 | 0 | 1 | 0 | 0 | 0 | 1 | 1 | 1 |
| Shroom4   | 0 | 0 | 0 | 0 | 1 | 0 | 0 | 0 | 1 | 1 | 1 |
| Shtn1     | 0 | 0 | 0 | 0 | 1 | 0 | 0 | 0 | 1 | 1 | 1 |
| Siah1b    | 0 | 0 | 0 | 0 | 1 | 0 | 0 | 0 | 1 | 1 | 1 |

|            |   |   |   |   |   |   |   |   |   |   |   |
|------------|---|---|---|---|---|---|---|---|---|---|---|
| Sidt1      | 0 | 0 | 0 | 0 | 1 | 0 | 0 | 0 | 1 | 1 | 1 |
| Siglec1    | 0 | 0 | 0 | 0 | 1 | 0 | 0 | 0 | 1 | 1 | 1 |
| Siglec5    | 0 | 0 | 0 | 0 | 1 | 0 | 0 | 0 | 1 | 1 | 1 |
| Sik3       | 0 | 0 | 0 | 0 | 1 | 0 | 0 | 0 | 1 | 1 | 1 |
| Sin3b      | 0 | 0 | 0 | 0 | 1 | 0 | 0 | 0 | 1 | 1 | 1 |
| Sipa1l2    | 0 | 0 | 0 | 0 | 1 | 0 | 0 | 0 | 1 | 1 | 1 |
| Sipa1l3    | 0 | 0 | 0 | 0 | 1 | 0 | 0 | 0 | 1 | 1 | 1 |
| Sirpb1b    | 0 | 0 | 0 | 0 | 1 | 0 | 0 | 0 | 1 | 1 | 1 |
| Sirt3      | 0 | 0 | 0 | 0 | 1 | 0 | 0 | 0 | 1 | 1 | 1 |
| Six5       | 0 | 0 | 0 | 0 | 1 | 0 | 0 | 0 | 1 | 1 | 1 |
| Skor2      | 0 | 0 | 0 | 0 | 1 | 0 | 0 | 0 | 1 | 1 | 1 |
| Slc10a4    | 0 | 0 | 0 | 0 | 1 | 0 | 0 | 0 | 1 | 1 | 1 |
| Slc12a4    | 0 | 0 | 0 | 0 | 1 | 0 | 0 | 0 | 1 | 1 | 1 |
| Slc12a7    | 0 | 0 | 0 | 0 | 1 | 0 | 0 | 0 | 1 | 1 | 1 |
| Slc12a9    | 0 | 0 | 0 | 0 | 1 | 0 | 0 | 0 | 1 | 1 | 1 |
| Slc14a2    | 0 | 0 | 0 | 0 | 1 | 0 | 0 | 0 | 1 | 1 | 1 |
| Slc15a1    | 0 | 0 | 0 | 0 | 1 | 0 | 0 | 0 | 1 | 1 | 1 |
| Slc15a2    | 0 | 0 | 0 | 0 | 1 | 0 | 0 | 0 | 1 | 1 | 1 |
| Slc16a10   | 0 | 0 | 0 | 0 | 1 | 0 | 0 | 0 | 1 | 1 | 1 |
| Slc17a3    | 0 | 0 | 0 | 0 | 0 | 0 | 1 | 0 | 1 | 1 | 1 |
| Slc1a2     | 0 | 0 | 0 | 0 | 1 | 0 | 0 | 0 | 1 | 1 | 1 |
| Slc20a1    | 0 | 0 | 0 | 0 | 1 | 0 | 0 | 0 | 1 | 1 | 1 |
| Slc22a13b- | 0 | 0 | 0 | 0 | 0 | 0 | 1 | 0 | 1 | 1 | 1 |
| Slc22a15   | 0 | 0 | 0 | 0 | 1 | 0 | 0 | 0 | 1 | 1 | 1 |
| Slc22a2    | 0 | 0 | 0 | 0 | 1 | 0 | 0 | 0 | 1 | 1 | 1 |
| Slc22a23   | 0 | 0 | 0 | 0 | 1 | 0 | 0 | 0 | 1 | 1 | 1 |
| Slc22a4    | 0 | 0 | 0 | 0 | 1 | 0 | 0 | 0 | 1 | 1 | 1 |
| Slc25a11   | 0 | 0 | 0 | 0 | 1 | 0 | 0 | 0 | 1 | 1 | 1 |
| Slc25a30   | 0 | 0 | 0 | 0 | 1 | 0 | 0 | 0 | 1 | 1 | 1 |
| Slc26a3    | 0 | 0 | 0 | 0 | 1 | 0 | 0 | 0 | 1 | 1 | 1 |
| Slc26a4    | 0 | 0 | 0 | 0 | 1 | 0 | 0 | 0 | 1 | 1 | 1 |
| Slc26a6    | 0 | 0 | 0 | 0 | 1 | 0 | 0 | 0 | 1 | 1 | 1 |
| Slc26a9    | 0 | 0 | 0 | 0 | 1 | 0 | 0 | 0 | 1 | 1 | 1 |

|          |   |   |   |   |   |   |   |   |   |   |   |
|----------|---|---|---|---|---|---|---|---|---|---|---|
| Slc27a2  | 0 | 0 | 0 | 0 | 1 | 0 | 0 | 0 | 1 | 1 | 1 |
| Slc28a2  | 0 | 0 | 0 | 0 | 1 | 0 | 0 | 0 | 1 | 1 | 1 |
| Slc29a3  | 0 | 0 | 0 | 0 | 1 | 0 | 0 | 0 | 1 | 1 | 1 |
| Slc2a7   | 0 | 0 | 0 | 0 | 1 | 0 | 0 | 0 | 1 | 1 | 1 |
| Slc34a2  | 0 | 0 | 0 | 0 | 1 | 0 | 0 | 0 | 1 | 1 | 1 |
| Slc34a3  | 0 | 0 | 0 | 0 | 1 | 0 | 0 | 0 | 1 | 1 | 1 |
| Slc35a5  | 0 | 0 | 0 | 0 | 1 | 0 | 0 | 0 | 1 | 1 | 1 |
| Slc35b3  | 0 | 0 | 0 | 0 | 1 | 0 | 0 | 0 | 1 | 1 | 1 |
| Slc36a3  | 0 | 0 | 0 | 0 | 0 | 0 | 1 | 0 | 1 | 1 | 1 |
| Slc38a10 | 0 | 0 | 0 | 0 | 1 | 0 | 0 | 0 | 1 | 1 | 1 |
| Slc38a6  | 0 | 0 | 0 | 0 | 1 | 0 | 0 | 0 | 1 | 1 | 1 |
| Slc39a6  | 0 | 0 | 0 | 0 | 1 | 0 | 0 | 0 | 1 | 1 | 1 |
| Slc39a8  | 0 | 0 | 0 | 0 | 1 | 0 | 0 | 0 | 1 | 1 | 1 |
| Slc41a3  | 0 | 0 | 0 | 0 | 1 | 0 | 0 | 0 | 1 | 1 | 1 |
| Slc44a5  | 0 | 0 | 0 | 0 | 1 | 0 | 0 | 0 | 1 | 1 | 1 |
| Slc47a1  | 0 | 0 | 0 | 0 | 1 | 0 | 0 | 0 | 1 | 1 | 1 |
| Slc4a1   | 0 | 0 | 0 | 0 | 1 | 0 | 0 | 0 | 1 | 1 | 1 |
| Slc4a5   | 0 | 0 | 0 | 0 | 1 | 0 | 0 | 0 | 1 | 1 | 1 |
| Slc4a9   | 0 | 0 | 0 | 0 | 1 | 0 | 0 | 0 | 1 | 1 | 1 |
| Slc5a10  | 0 | 0 | 0 | 0 | 1 | 0 | 0 | 0 | 1 | 1 | 1 |
| Slc5a5   | 0 | 0 | 0 | 0 | 1 | 0 | 0 | 0 | 1 | 1 | 1 |
| Slc6a12  | 0 | 0 | 0 | 0 | 1 | 0 | 0 | 0 | 1 | 1 | 1 |
| Slc6a7   | 0 | 0 | 0 | 0 | 1 | 0 | 0 | 0 | 1 | 1 | 1 |
| Slc7a11  | 0 | 0 | 0 | 0 | 1 | 0 | 0 | 0 | 1 | 1 | 1 |
| Slc7a13  | 0 | 0 | 0 | 0 | 1 | 0 | 0 | 0 | 1 | 1 | 1 |
| Slc7a6   | 0 | 0 | 0 | 0 | 1 | 0 | 0 | 0 | 1 | 1 | 1 |
| Slc8a3   | 0 | 0 | 0 | 0 | 1 | 0 | 0 | 0 | 1 | 1 | 1 |
| Slc9b2   | 0 | 0 | 0 | 0 | 1 | 0 | 0 | 0 | 1 | 1 | 1 |
| Slco1a4  | 0 | 0 | 0 | 0 | 1 | 0 | 0 | 0 | 1 | 1 | 1 |
| Slf1     | 0 | 0 | 0 | 0 | 0 | 0 | 1 | 0 | 1 | 1 | 1 |
| Slf2     | 0 | 0 | 0 | 0 | 1 | 0 | 0 | 0 | 1 | 1 | 1 |
| Slfn14   | 0 | 0 | 0 | 0 | 0 | 1 | 0 | 0 | 1 | 1 | 1 |
| Slitrk4  | 0 | 0 | 0 | 0 | 1 | 0 | 0 | 0 | 1 | 1 | 1 |

|          |   |   |   |   |   |   |   |   |   |   |   |
|----------|---|---|---|---|---|---|---|---|---|---|---|
| Slk      | 0 | 0 | 0 | 0 | 1 | 0 | 0 | 0 | 1 | 1 | 1 |
| Slx1b    | 0 | 0 | 0 | 0 | 1 | 0 | 0 | 0 | 1 | 1 | 1 |
| Smarca2  | 0 | 0 | 0 | 0 | 1 | 0 | 0 | 0 | 1 | 1 | 1 |
| Smarca4  | 0 | 0 | 0 | 0 | 1 | 0 | 0 | 0 | 1 | 1 | 1 |
| Smarcad1 | 0 | 0 | 0 | 0 | 1 | 0 | 0 | 0 | 1 | 1 | 1 |
| Smarcal1 | 0 | 0 | 0 | 0 | 1 | 0 | 0 | 0 | 1 | 1 | 1 |
| Smarcc1  | 0 | 0 | 0 | 0 | 1 | 0 | 0 | 0 | 1 | 1 | 1 |
| Smarcd1  | 0 | 0 | 0 | 0 | 1 | 0 | 0 | 0 | 1 | 1 | 1 |
| Smarcd2  | 0 | 0 | 0 | 0 | 1 | 0 | 0 | 0 | 1 | 1 | 1 |
| Smc4     | 0 | 0 | 0 | 0 | 1 | 0 | 0 | 0 | 1 | 1 | 1 |
| Smc5     | 0 | 0 | 0 | 0 | 1 | 0 | 0 | 0 | 1 | 1 | 1 |
| Smg1     | 0 | 0 | 0 | 0 | 1 | 0 | 0 | 0 | 1 | 1 | 1 |
| Smok2b   | 0 | 0 | 0 | 0 | 1 | 0 | 0 | 0 | 1 | 1 | 1 |
| Smpd1    | 0 | 0 | 0 | 0 | 1 | 0 | 0 | 0 | 1 | 1 | 1 |
| Smpd4    | 0 | 0 | 0 | 0 | 0 | 0 | 1 | 0 | 1 | 1 | 1 |
| Smyd5    | 0 | 0 | 0 | 0 | 1 | 0 | 0 | 0 | 1 | 1 | 1 |
| Snpc2    | 0 | 0 | 0 | 0 | 1 | 0 | 0 | 0 | 1 | 1 | 1 |
| Snca     | 0 | 0 | 0 | 0 | 1 | 0 | 0 | 0 | 1 | 1 | 1 |
| Snrnp48  | 0 | 0 | 0 | 0 | 1 | 0 | 0 | 0 | 1 | 1 | 1 |
| Snrpd2   | 0 | 0 | 0 | 0 | 1 | 0 | 0 | 0 | 1 | 1 | 1 |
| Snx19    | 0 | 0 | 0 | 0 | 1 | 0 | 0 | 0 | 1 | 1 | 1 |
| Snx29    | 0 | 0 | 0 | 0 | 1 | 0 | 0 | 0 | 1 | 1 | 1 |
| Snx4     | 0 | 0 | 0 | 0 | 1 | 0 | 0 | 0 | 1 | 1 | 1 |
| Snx9     | 0 | 0 | 0 | 0 | 1 | 0 | 0 | 0 | 1 | 1 | 1 |
| Sos2     | 0 | 0 | 0 | 0 | 1 | 0 | 0 | 0 | 1 | 1 | 1 |
| Sowahd   | 0 | 0 | 0 | 0 | 1 | 0 | 0 | 0 | 1 | 1 | 1 |
| Sox5     | 0 | 0 | 0 | 0 | 1 | 0 | 0 | 0 | 1 | 1 | 1 |
| Sp110    | 0 | 0 | 0 | 0 | 1 | 0 | 0 | 0 | 1 | 1 | 1 |
| Sp140    | 0 | 0 | 0 | 0 | 1 | 0 | 0 | 0 | 1 | 1 | 1 |
| Sp7      | 0 | 0 | 0 | 0 | 1 | 0 | 0 | 0 | 1 | 1 | 1 |
| Spag11   | 0 | 0 | 0 | 0 | 1 | 0 | 0 | 0 | 1 | 1 | 1 |
| Spag16   | 0 | 0 | 0 | 0 | 0 | 0 | 1 | 0 | 1 | 1 | 1 |
| Spag17   | 0 | 0 | 0 | 0 | 1 | 0 | 0 | 0 | 1 | 1 | 1 |

|           |   |   |   |   |   |   |   |   |   |   |   |
|-----------|---|---|---|---|---|---|---|---|---|---|---|
| Spast     | 0 | 0 | 0 | 0 | 0 | 1 | 0 | 0 | 1 | 1 | 1 |
| Spata17   | 0 | 0 | 0 | 0 | 1 | 0 | 0 | 0 | 1 | 1 | 1 |
| Spata18   | 0 | 0 | 0 | 0 | 1 | 0 | 0 | 0 | 1 | 1 | 1 |
| Spata19   | 0 | 0 | 0 | 0 | 1 | 0 | 0 | 0 | 1 | 1 | 1 |
| Spata21   | 0 | 0 | 0 | 0 | 1 | 0 | 0 | 0 | 1 | 1 | 1 |
| Spata2l   | 0 | 0 | 0 | 0 | 1 | 0 | 0 | 0 | 1 | 1 | 1 |
| Spata31d1 | 0 | 0 | 0 | 0 | 1 | 0 | 0 | 0 | 1 | 1 | 1 |
| Spata45   | 0 | 0 | 0 | 0 | 1 | 0 | 0 | 0 | 1 | 1 | 1 |
| Spats2l   | 0 | 0 | 0 | 0 | 1 | 0 | 0 | 0 | 1 | 1 | 1 |
| Speer4a   | 0 | 0 | 0 | 0 | 1 | 0 | 0 | 0 | 1 | 1 | 1 |
| Speer4c   | 0 | 0 | 0 | 0 | 1 | 0 | 0 | 0 | 1 | 1 | 1 |
| Spf2      | 0 | 0 | 0 | 0 | 1 | 0 | 0 | 0 | 1 | 1 | 1 |
| Sphkap    | 0 | 0 | 0 | 0 | 1 | 0 | 0 | 0 | 1 | 1 | 1 |
| Spidr     | 0 | 0 | 0 | 0 | 1 | 0 | 0 | 0 | 1 | 1 | 1 |
| Spink10   | 0 | 0 | 0 | 0 | 0 | 0 | 1 | 0 | 1 | 1 | 1 |
| Spon1     | 0 | 0 | 0 | 0 | 1 | 0 | 0 | 0 | 1 | 1 | 1 |
| Sppl2a    | 0 | 0 | 0 | 0 | 1 | 0 | 0 | 0 | 1 | 1 | 1 |
| Spred2    | 0 | 0 | 0 | 0 | 1 | 0 | 0 | 0 | 1 | 1 | 1 |
| Sprn      | 0 | 0 | 0 | 0 | 1 | 0 | 0 | 0 | 1 | 1 | 1 |
| Sptb      | 0 | 0 | 0 | 0 | 1 | 0 | 0 | 0 | 1 | 1 | 1 |
| Sptlc1    | 0 | 0 | 0 | 0 | 1 | 0 | 0 | 0 | 1 | 1 | 1 |
| Sptlc3    | 0 | 0 | 0 | 0 | 1 | 0 | 0 | 0 | 1 | 1 | 1 |
| Sqor      | 0 | 0 | 0 | 0 | 1 | 0 | 0 | 0 | 1 | 1 | 1 |
| Sra1      | 0 | 0 | 0 | 0 | 1 | 0 | 0 | 0 | 1 | 1 | 1 |
| Srbd1     | 0 | 0 | 0 | 0 | 0 | 1 | 0 | 0 | 1 | 1 | 1 |
| Srcap     | 0 | 0 | 0 | 0 | 1 | 0 | 0 | 0 | 1 | 1 | 1 |
| Srcin1    | 0 | 0 | 0 | 0 | 1 | 0 | 0 | 0 | 1 | 1 | 1 |
| Srfbp1    | 0 | 0 | 0 | 0 | 1 | 0 | 0 | 0 | 1 | 1 | 1 |
| Srgap1    | 0 | 0 | 0 | 0 | 1 | 0 | 0 | 0 | 1 | 1 | 1 |
| Srgap3    | 0 | 0 | 0 | 0 | 0 | 0 | 1 | 0 | 1 | 1 | 1 |
| Srp72     | 0 | 0 | 0 | 0 | 1 | 0 | 0 | 0 | 1 | 1 | 1 |
| Srpk1     | 0 | 0 | 0 | 0 | 0 | 0 | 1 | 0 | 1 | 1 | 1 |
| Srpk3     | 0 | 0 | 0 | 0 | 0 | 0 | 1 | 0 | 1 | 1 | 1 |



|            |   |   |   |   |   |   |   |   |   |   |   |
|------------|---|---|---|---|---|---|---|---|---|---|---|
| Srrd       | 0 | 0 | 0 | 0 | 0 | 1 | 0 | 0 | 1 | 1 | 1 |
| Srrm1      | 0 | 0 | 0 | 0 | 1 | 0 | 0 | 0 | 1 | 1 | 1 |
| Srrt       | 0 | 0 | 0 | 0 | 1 | 0 | 0 | 0 | 1 | 1 | 1 |
| Ssx2ip     | 0 | 0 | 0 | 0 | 1 | 0 | 0 | 0 | 1 | 1 | 1 |
| Ssxb3      | 0 | 0 | 0 | 1 | 0 | 0 | 0 | 0 | 1 | 1 | 1 |
| St3gal6    | 0 | 0 | 0 | 0 | 1 | 0 | 0 | 0 | 1 | 1 | 1 |
| St5        | 0 | 0 | 0 | 0 | 1 | 0 | 0 | 0 | 1 | 1 | 1 |
| St6gal2    | 0 | 0 | 0 | 0 | 1 | 0 | 0 | 0 | 1 | 1 | 1 |
| St6galnac3 | 0 | 0 | 0 | 0 | 1 | 0 | 0 | 0 | 1 | 1 | 1 |
| St6galnac5 | 0 | 0 | 0 | 0 | 1 | 0 | 0 | 0 | 1 | 1 | 1 |
| St6galnac6 | 0 | 0 | 0 | 0 | 1 | 0 | 0 | 0 | 1 | 1 | 1 |
| St8sia3    | 0 | 0 | 0 | 0 | 1 | 0 | 0 | 0 | 1 | 1 | 1 |
| Stab1      | 0 | 0 | 0 | 0 | 1 | 0 | 0 | 0 | 1 | 1 | 1 |
| Stab2      | 0 | 0 | 0 | 0 | 1 | 0 | 0 | 0 | 1 | 1 | 1 |
| Stac3      | 0 | 0 | 0 | 0 | 1 | 0 | 0 | 0 | 1 | 1 | 1 |
| Stag3      | 0 | 0 | 0 | 0 | 1 | 0 | 0 | 0 | 1 | 1 | 1 |
| Stambpl1   | 0 | 0 | 0 | 0 | 1 | 0 | 0 | 0 | 1 | 1 | 1 |
| Stap1      | 0 | 0 | 0 | 0 | 1 | 0 | 0 | 0 | 1 | 1 | 1 |
| Stard3nl   | 0 | 0 | 0 | 0 | 1 | 0 | 0 | 0 | 1 | 1 | 1 |
| Stard6     | 0 | 0 | 0 | 0 | 1 | 0 | 0 | 0 | 1 | 1 | 1 |
| Stard8     | 0 | 0 | 0 | 0 | 1 | 0 | 0 | 0 | 1 | 1 | 1 |
| Stard9     | 0 | 0 | 0 | 0 | 1 | 0 | 0 | 0 | 1 | 1 | 1 |
| Stat2      | 0 | 0 | 0 | 0 | 1 | 0 | 0 | 0 | 1 | 1 | 1 |
| Stau1      | 0 | 0 | 0 | 0 | 1 | 0 | 0 | 0 | 1 | 1 | 1 |
| Stim1      | 0 | 0 | 0 | 0 | 1 | 0 | 0 | 0 | 1 | 1 | 1 |
| Stim2      | 0 | 0 | 0 | 0 | 1 | 0 | 0 | 0 | 1 | 1 | 1 |
| Stk24      | 0 | 0 | 0 | 0 | 1 | 0 | 0 | 0 | 1 | 1 | 1 |
| Stk32c     | 0 | 0 | 0 | 0 | 1 | 0 | 0 | 0 | 1 | 1 | 1 |
| Stn1       | 0 | 0 | 0 | 0 | 1 | 0 | 0 | 0 | 1 | 1 | 1 |
| Ston2      | 0 | 0 | 0 | 0 | 1 | 0 | 0 | 0 | 1 | 1 | 1 |
| Stox2      | 0 | 0 | 0 | 0 | 1 | 0 | 0 | 0 | 1 | 1 | 1 |
| Stxbp5l    | 0 | 0 | 0 | 0 | 1 | 0 | 0 | 0 | 1 | 1 | 1 |
| Styx       | 0 | 0 | 0 | 0 | 1 | 0 | 0 | 0 | 1 | 1 | 1 |

|          |   |   |   |   |   |   |   |   |   |   |   |
|----------|---|---|---|---|---|---|---|---|---|---|---|
| Suc1g1   | 0 | 0 | 0 | 0 | 1 | 0 | 0 | 0 | 1 | 1 | 1 |
| Suco     | 0 | 0 | 0 | 0 | 1 | 0 | 0 | 0 | 1 | 1 | 1 |
| Sulf1    | 0 | 0 | 0 | 0 | 1 | 0 | 0 | 0 | 1 | 1 | 1 |
| Sult1a1  | 0 | 0 | 0 | 0 | 1 | 0 | 0 | 0 | 1 | 1 | 1 |
| Sult1e1  | 0 | 0 | 0 | 0 | 1 | 0 | 0 | 0 | 1 | 1 | 1 |
| Sun2     | 0 | 0 | 0 | 0 | 1 | 0 | 0 | 0 | 1 | 1 | 1 |
| Supv311  | 0 | 0 | 0 | 0 | 1 | 0 | 0 | 0 | 1 | 1 | 1 |
| Sv2a     | 0 | 0 | 0 | 0 | 1 | 0 | 0 | 0 | 1 | 1 | 1 |
| Svil     | 0 | 0 | 0 | 0 | 0 | 1 | 0 | 0 | 1 | 1 | 1 |
| Sycp1    | 0 | 0 | 1 | 0 | 0 | 0 | 0 | 0 | 1 | 1 | 1 |
| Sycp2    | 0 | 0 | 0 | 0 | 1 | 0 | 0 | 0 | 1 | 1 | 1 |
| Syde2    | 0 | 0 | 0 | 0 | 0 | 1 | 0 | 0 | 1 | 1 | 1 |
| Syndig1  | 0 | 0 | 0 | 0 | 1 | 0 | 0 | 0 | 1 | 1 | 1 |
| Syne4    | 0 | 0 | 0 | 0 | 1 | 0 | 0 | 0 | 1 | 1 | 1 |
| Synpo2   | 0 | 0 | 0 | 0 | 1 | 0 | 0 | 0 | 1 | 1 | 1 |
| Sys1     | 0 | 0 | 0 | 0 | 1 | 0 | 0 | 0 | 1 | 1 | 1 |
| Syt15    | 0 | 0 | 0 | 0 | 1 | 0 | 0 | 0 | 1 | 1 | 1 |
| Syt16    | 0 | 0 | 0 | 0 | 1 | 0 | 0 | 0 | 1 | 1 | 1 |
| Syt11    | 0 | 0 | 0 | 0 | 1 | 0 | 0 | 0 | 1 | 1 | 1 |
| Syt12    | 0 | 0 | 0 | 0 | 1 | 0 | 0 | 0 | 1 | 1 | 1 |
| Taar7b   | 0 | 0 | 0 | 0 | 0 | 1 | 0 | 0 | 1 | 1 | 1 |
| Taar7e   | 0 | 0 | 0 | 0 | 1 | 0 | 0 | 0 | 1 | 1 | 1 |
| Tacc3    | 0 | 0 | 0 | 0 | 1 | 0 | 0 | 0 | 1 | 1 | 1 |
| Taf6l    | 0 | 0 | 0 | 0 | 1 | 0 | 0 | 0 | 1 | 1 | 1 |
| Tagap1   | 0 | 0 | 0 | 0 | 1 | 0 | 0 | 0 | 1 | 1 | 1 |
| Tal1     | 0 | 0 | 0 | 0 | 1 | 0 | 0 | 0 | 1 | 1 | 1 |
| Tanc2    | 0 | 0 | 0 | 0 | 1 | 0 | 0 | 0 | 1 | 1 | 1 |
| Tapbpl   | 0 | 0 | 0 | 0 | 1 | 0 | 0 | 0 | 1 | 1 | 1 |
| Tarsl2   | 0 | 0 | 0 | 0 | 1 | 0 | 0 | 0 | 1 | 1 | 1 |
| Tas2r110 | 0 | 0 | 0 | 0 | 1 | 0 | 0 | 0 | 1 | 1 | 1 |
| Tas2r113 | 0 | 0 | 0 | 0 | 1 | 0 | 0 | 0 | 1 | 1 | 1 |
| Tbc1d10b | 0 | 0 | 0 | 0 | 1 | 0 | 0 | 0 | 1 | 1 | 1 |
| Tbc1d12  | 0 | 0 | 0 | 0 | 1 | 0 | 0 | 0 | 1 | 1 | 1 |

|          |   |   |   |   |   |   |   |   |   |   |   |
|----------|---|---|---|---|---|---|---|---|---|---|---|
| Tbc1d13  | 0 | 0 | 0 | 0 | 1 | 0 | 0 | 0 | 1 | 1 | 1 |
| Tbc1d22a | 0 | 0 | 0 | 0 | 1 | 0 | 0 | 0 | 1 | 1 | 1 |
| Tbc1d22b | 0 | 0 | 0 | 0 | 1 | 0 | 0 | 0 | 1 | 1 | 1 |
| Tbc1d31  | 0 | 0 | 0 | 0 | 1 | 0 | 0 | 0 | 1 | 1 | 1 |
| Tbc1d32  | 0 | 0 | 0 | 0 | 1 | 0 | 0 | 0 | 1 | 1 | 1 |
| Tbc1d8   | 0 | 0 | 0 | 0 | 1 | 0 | 0 | 0 | 1 | 1 | 1 |
| Tbck     | 0 | 0 | 0 | 0 | 1 | 0 | 0 | 0 | 1 | 1 | 1 |
| Tbr1     | 0 | 0 | 0 | 0 | 1 | 0 | 0 | 0 | 1 | 1 | 1 |
| Tbx18    | 0 | 0 | 0 | 0 | 0 | 1 | 0 | 0 | 1 | 1 | 1 |
| Tbx21    | 0 | 0 | 0 | 0 | 0 | 0 | 1 | 0 | 1 | 1 | 1 |
| Tbx22    | 0 | 0 | 0 | 0 | 1 | 0 | 0 | 0 | 1 | 1 | 1 |
| Tbx6     | 0 | 0 | 0 | 0 | 1 | 0 | 0 | 0 | 1 | 1 | 1 |
| Tcaim    | 0 | 0 | 0 | 0 | 1 | 0 | 0 | 0 | 1 | 1 | 1 |
| Tceal3   | 0 | 0 | 0 | 0 | 1 | 0 | 0 | 0 | 1 | 1 | 1 |
| Tcf20    | 0 | 0 | 0 | 0 | 1 | 0 | 0 | 0 | 1 | 1 | 1 |
| Tcp11x2  | 0 | 0 | 0 | 0 | 1 | 0 | 0 | 0 | 1 | 1 | 1 |
| Tcrg-C1  | 0 | 0 | 0 | 0 | 1 | 0 | 0 | 0 | 1 | 1 | 1 |
| Tdrd1    | 0 | 0 | 0 | 0 | 0 | 0 | 1 | 0 | 1 | 1 | 1 |
| Tdrd6    | 0 | 0 | 0 | 0 | 1 | 0 | 0 | 0 | 1 | 1 | 1 |
| Tecpr1   | 0 | 0 | 0 | 0 | 0 | 1 | 0 | 0 | 1 | 1 | 1 |
| Tecrl    | 0 | 0 | 0 | 0 | 1 | 0 | 0 | 0 | 1 | 1 | 1 |
| Tedc2    | 0 | 0 | 0 | 0 | 0 | 0 | 1 | 0 | 1 | 1 | 1 |
| Teddm3   | 0 | 0 | 0 | 0 | 1 | 0 | 0 | 0 | 1 | 1 | 1 |
| Tefm     | 0 | 0 | 0 | 0 | 1 | 0 | 0 | 0 | 1 | 1 | 1 |
| Tek      | 0 | 0 | 0 | 0 | 0 | 1 | 0 | 0 | 1 | 1 | 1 |
| Tenm3    | 0 | 0 | 0 | 0 | 1 | 0 | 0 | 0 | 1 | 1 | 1 |
| Tenm4    | 0 | 0 | 0 | 0 | 0 | 1 | 0 | 0 | 1 | 1 | 1 |
| Terb2    | 0 | 0 | 0 | 0 | 1 | 0 | 0 | 0 | 1 | 1 | 1 |
| Terf1    | 0 | 0 | 0 | 0 | 0 | 1 | 0 | 0 | 1 | 1 | 1 |
| Terf2    | 0 | 0 | 0 | 0 | 1 | 0 | 0 | 0 | 1 | 1 | 1 |
| Tesk1    | 0 | 0 | 0 | 0 | 1 | 0 | 0 | 0 | 1 | 1 | 1 |
| Tesk2    | 0 | 0 | 0 | 0 | 1 | 0 | 0 | 0 | 1 | 1 | 1 |
| Tet1     | 0 | 0 | 0 | 0 | 1 | 0 | 0 | 0 | 1 | 1 | 1 |

|         |   |   |   |   |   |   |   |   |   |   |   |
|---------|---|---|---|---|---|---|---|---|---|---|---|
| Tet3    | 0 | 0 | 0 | 0 | 1 | 0 | 0 | 0 | 1 | 1 | 1 |
| Tex13c3 | 0 | 0 | 0 | 0 | 1 | 0 | 0 | 0 | 1 | 1 | 1 |
| Tex24   | 0 | 0 | 0 | 0 | 1 | 0 | 0 | 0 | 1 | 1 | 1 |
| Tex29   | 0 | 0 | 0 | 0 | 1 | 0 | 0 | 0 | 1 | 1 | 1 |
| Tex30   | 0 | 0 | 0 | 0 | 1 | 0 | 0 | 0 | 1 | 1 | 1 |
| Tfap2a  | 0 | 0 | 0 | 0 | 1 | 0 | 0 | 0 | 1 | 1 | 1 |
| Tfap2b  | 0 | 0 | 0 | 0 | 1 | 0 | 0 | 0 | 1 | 1 | 1 |
| Tfec    | 0 | 0 | 0 | 0 | 0 | 0 | 1 | 0 | 1 | 1 | 1 |
| Tfrc    | 0 | 0 | 0 | 0 | 1 | 0 | 0 | 0 | 1 | 1 | 1 |
| Tgfbr3  | 0 | 0 | 0 | 0 | 1 | 0 | 0 | 0 | 1 | 1 | 1 |
| Tgm6    | 0 | 0 | 0 | 0 | 1 | 0 | 0 | 0 | 1 | 1 | 1 |
| Tgoln1  | 0 | 0 | 0 | 0 | 1 | 0 | 0 | 0 | 1 | 1 | 1 |
| Thap3   | 0 | 0 | 0 | 0 | 0 | 0 | 1 | 0 | 1 | 1 | 1 |
| Thbs2   | 0 | 0 | 0 | 0 | 1 | 0 | 0 | 0 | 1 | 1 | 1 |
| Thnsl1  | 0 | 0 | 0 | 0 | 1 | 0 | 0 | 0 | 1 | 1 | 1 |
| Thrap3  | 0 | 0 | 0 | 0 | 1 | 0 | 0 | 0 | 1 | 1 | 1 |
| Thsd7a  | 0 | 0 | 0 | 0 | 0 | 1 | 0 | 0 | 1 | 1 | 1 |
| Tiam1   | 0 | 0 | 0 | 0 | 1 | 0 | 0 | 0 | 1 | 1 | 1 |
| Ticrr   | 0 | 0 | 0 | 0 | 1 | 0 | 0 | 0 | 1 | 1 | 1 |
| Tigit   | 0 | 0 | 0 | 0 | 1 | 0 | 0 | 0 | 1 | 1 | 1 |
| Timd4   | 0 | 0 | 0 | 0 | 0 | 1 | 0 | 0 | 1 | 1 | 1 |
| Tle1    | 0 | 0 | 0 | 0 | 0 | 0 | 1 | 0 | 1 | 1 | 1 |
| Tle6    | 0 | 0 | 0 | 0 | 1 | 0 | 0 | 0 | 1 | 1 | 1 |
| Tln1    | 0 | 0 | 0 | 0 | 1 | 0 | 0 | 0 | 1 | 1 | 1 |
| Tlr1    | 0 | 0 | 0 | 0 | 1 | 0 | 0 | 0 | 1 | 1 | 1 |
| Tlr4    | 0 | 0 | 0 | 0 | 1 | 0 | 0 | 0 | 1 | 1 | 1 |
| Tm4sf19 | 0 | 0 | 0 | 0 | 1 | 0 | 0 | 0 | 1 | 1 | 1 |
| Tma16   | 0 | 0 | 0 | 0 | 1 | 0 | 0 | 0 | 1 | 1 | 1 |
| Tmc1    | 0 | 0 | 0 | 0 | 1 | 0 | 0 | 0 | 1 | 1 | 1 |
| Tmc4    | 0 | 0 | 0 | 0 | 0 | 0 | 1 | 0 | 1 | 1 | 1 |
| Tmc5    | 0 | 0 | 0 | 0 | 1 | 0 | 0 | 0 | 1 | 1 | 1 |
| Tmc7    | 1 | 0 | 0 | 0 | 0 | 0 | 0 | 0 | 1 | 1 | 1 |
| Tmco6   | 0 | 0 | 0 | 0 | 0 | 1 | 0 | 0 | 1 | 1 | 1 |

|          |   |   |   |   |   |   |   |   |   |   |   |
|----------|---|---|---|---|---|---|---|---|---|---|---|
| Tmem116  | 0 | 0 | 0 | 0 | 1 | 0 | 0 | 0 | 1 | 1 | 1 |
| Tmem132€ | 0 | 0 | 0 | 0 | 1 | 0 | 0 | 0 | 1 | 1 | 1 |
| Tmem135  | 0 | 0 | 0 | 0 | 1 | 0 | 0 | 0 | 1 | 1 | 1 |
| Tmem158  | 0 | 0 | 0 | 0 | 1 | 0 | 0 | 0 | 1 | 1 | 1 |
| Tmem160  | 0 | 0 | 0 | 0 | 1 | 0 | 0 | 0 | 1 | 1 | 1 |
| Tmem165  | 0 | 0 | 0 | 0 | 1 | 0 | 0 | 0 | 1 | 1 | 1 |
| Tmem167k | 0 | 0 | 0 | 0 | 1 | 0 | 0 | 0 | 1 | 1 | 1 |
| Tmem173  | 0 | 0 | 0 | 0 | 1 | 0 | 0 | 0 | 1 | 1 | 1 |
| Tmem182  | 0 | 0 | 0 | 0 | 1 | 0 | 0 | 0 | 1 | 1 | 1 |
| Tmem184€ | 0 | 0 | 0 | 0 | 1 | 0 | 0 | 0 | 1 | 1 | 1 |
| Tmem191c | 0 | 0 | 0 | 0 | 1 | 0 | 0 | 0 | 1 | 1 | 1 |
| Tmem198k | 0 | 0 | 0 | 0 | 1 | 0 | 0 | 0 | 1 | 1 | 1 |
| Tmem200€ | 0 | 0 | 0 | 0 | 1 | 0 | 0 | 0 | 1 | 1 | 1 |
| Tmem215  | 0 | 0 | 0 | 0 | 1 | 0 | 0 | 0 | 1 | 1 | 1 |
| Tmem245  | 0 | 0 | 0 | 0 | 1 | 0 | 0 | 0 | 1 | 1 | 1 |
| Tmem248  | 0 | 0 | 0 | 0 | 1 | 0 | 0 | 0 | 1 | 1 | 1 |
| Tmem41b  | 0 | 0 | 0 | 0 | 1 | 0 | 0 | 0 | 1 | 1 | 1 |
| Tmem45b  | 0 | 0 | 0 | 0 | 1 | 0 | 0 | 0 | 1 | 1 | 1 |
| Tmem55b  | 0 | 0 | 0 | 0 | 1 | 0 | 0 | 0 | 1 | 1 | 1 |
| Tmem59l  | 0 | 0 | 0 | 0 | 1 | 0 | 0 | 0 | 1 | 1 | 1 |
| Tmem63a  | 0 | 0 | 0 | 0 | 1 | 0 | 0 | 0 | 1 | 1 | 1 |
| Tmem63b  | 0 | 0 | 0 | 0 | 1 | 0 | 0 | 0 | 1 | 1 | 1 |
| Tmem68   | 0 | 0 | 0 | 0 | 1 | 0 | 0 | 0 | 1 | 1 | 1 |
| Tmem71   | 0 | 0 | 0 | 0 | 1 | 0 | 0 | 0 | 1 | 1 | 1 |
| Tmem86b  | 0 | 0 | 0 | 0 | 1 | 0 | 0 | 0 | 1 | 1 | 1 |
| Tmem92   | 0 | 0 | 0 | 0 | 1 | 0 | 0 | 0 | 1 | 1 | 1 |
| Tmpo     | 0 | 0 | 0 | 0 | 1 | 0 | 0 | 0 | 1 | 1 | 1 |
| Tmprss15 | 0 | 0 | 0 | 0 | 1 | 0 | 0 | 0 | 1 | 1 | 1 |
| Tmtc4    | 0 | 0 | 0 | 0 | 0 | 1 | 0 | 0 | 1 | 1 | 1 |
| Tnfrsf1a | 0 | 0 | 0 | 0 | 1 | 0 | 0 | 0 | 1 | 1 | 1 |
| Tnfrsf21 | 0 | 0 | 0 | 0 | 1 | 0 | 0 | 0 | 1 | 1 | 1 |
| Tnik     | 0 | 0 | 0 | 0 | 1 | 0 | 0 | 0 | 1 | 1 | 1 |
| Tnip3    | 0 | 0 | 0 | 0 | 0 | 0 | 1 | 0 | 1 | 1 | 1 |

|          |   |   |   |   |   |   |   |   |   |   |   |
|----------|---|---|---|---|---|---|---|---|---|---|---|
| Tnk2     | 0 | 0 | 0 | 0 | 1 | 0 | 0 | 0 | 1 | 1 | 1 |
| Tnpo1    | 0 | 0 | 0 | 0 | 1 | 0 | 0 | 0 | 1 | 1 | 1 |
| Tnrc6b   | 0 | 0 | 0 | 0 | 1 | 0 | 0 | 0 | 1 | 1 | 1 |
| Tnrc6c   | 0 | 0 | 0 | 0 | 1 | 0 | 0 | 0 | 1 | 1 | 1 |
| Tns2     | 0 | 0 | 0 | 0 | 1 | 0 | 0 | 0 | 1 | 1 | 1 |
| Tnxb     | 0 | 0 | 0 | 0 | 1 | 0 | 0 | 0 | 1 | 1 | 1 |
| Togaram1 | 0 | 0 | 1 | 0 | 0 | 0 | 0 | 0 | 1 | 1 | 1 |
| Tomm40l  | 0 | 0 | 0 | 0 | 1 | 0 | 0 | 0 | 1 | 1 | 1 |
| Top1     | 0 | 0 | 0 | 0 | 1 | 0 | 0 | 0 | 1 | 1 | 1 |
| Top2a    | 0 | 0 | 0 | 0 | 1 | 0 | 0 | 0 | 1 | 1 | 1 |
| Top3a    | 0 | 0 | 0 | 0 | 1 | 0 | 0 | 0 | 1 | 1 | 1 |
| Topbp1   | 0 | 0 | 0 | 0 | 1 | 0 | 0 | 0 | 1 | 1 | 1 |
| Topors   | 0 | 0 | 0 | 0 | 1 | 0 | 0 | 0 | 1 | 1 | 1 |
| Toporsl  | 0 | 0 | 0 | 0 | 1 | 0 | 0 | 0 | 1 | 1 | 1 |
| Tox      | 0 | 0 | 0 | 0 | 1 | 0 | 0 | 0 | 1 | 1 | 1 |
| Tox2     | 0 | 0 | 0 | 0 | 1 | 0 | 0 | 0 | 1 | 1 | 1 |
| Tpgs2    | 0 | 0 | 0 | 0 | 1 | 0 | 0 | 0 | 1 | 1 | 1 |
| Tpo      | 0 | 0 | 0 | 0 | 1 | 0 | 0 | 0 | 1 | 1 | 1 |
| Tpp1     | 0 | 0 | 0 | 0 | 1 | 0 | 0 | 0 | 1 | 1 | 1 |
| Tra2a    | 0 | 0 | 0 | 0 | 1 | 0 | 0 | 0 | 1 | 1 | 1 |
| Traf3ip2 | 0 | 0 | 0 | 0 | 1 | 0 | 0 | 0 | 1 | 1 | 1 |
| Traf7    | 0 | 0 | 0 | 0 | 1 | 0 | 0 | 0 | 1 | 1 | 1 |
| Traj12   | 0 | 0 | 0 | 0 | 1 | 0 | 0 | 0 | 1 | 1 | 1 |
| Traj53   | 0 | 0 | 0 | 0 | 1 | 0 | 0 | 0 | 1 | 1 | 1 |
| Trappc10 | 0 | 0 | 0 | 0 | 1 | 0 | 0 | 0 | 1 | 1 | 1 |
| Trappc3l | 0 | 0 | 0 | 0 | 1 | 0 | 0 | 0 | 1 | 1 | 1 |
| Trappc9  | 0 | 0 | 0 | 0 | 1 | 0 | 0 | 0 | 1 | 1 | 1 |
| Trav16   | 0 | 0 | 0 | 0 | 1 | 0 | 0 | 0 | 1 | 1 | 1 |
| Trav2    | 0 | 0 | 0 | 0 | 0 | 0 | 1 | 0 | 1 | 1 | 1 |
| Trav3-3  | 0 | 0 | 0 | 0 | 1 | 0 | 0 | 0 | 1 | 1 | 1 |
| Trbd1    | 0 | 0 | 0 | 0 | 1 | 0 | 0 | 0 | 1 | 1 | 1 |
| Trbv15   | 0 | 0 | 0 | 0 | 1 | 0 | 0 | 0 | 1 | 1 | 1 |
| Trbv31   | 0 | 0 | 0 | 0 | 0 | 1 | 0 | 0 | 1 | 1 | 1 |

|           |   |   |   |   |   |   |   |   |   |   |   |
|-----------|---|---|---|---|---|---|---|---|---|---|---|
| Trcg1     | 0 | 0 | 0 | 0 | 1 | 0 | 0 | 0 | 1 | 1 | 1 |
| Trhr      | 0 | 0 | 0 | 0 | 1 | 0 | 0 | 0 | 1 | 1 | 1 |
| Trhr2     | 0 | 0 | 0 | 0 | 1 | 0 | 0 | 0 | 1 | 1 | 1 |
| Tril      | 0 | 0 | 0 | 0 | 1 | 0 | 0 | 0 | 1 | 1 | 1 |
| Trim26    | 0 | 0 | 0 | 0 | 1 | 0 | 0 | 0 | 1 | 1 | 1 |
| Trim30c   | 0 | 0 | 0 | 0 | 0 | 1 | 0 | 0 | 1 | 1 | 1 |
| Trim39    | 0 | 0 | 0 | 0 | 1 | 0 | 0 | 0 | 1 | 1 | 1 |
| Trim41    | 0 | 0 | 0 | 0 | 1 | 0 | 0 | 0 | 1 | 1 | 1 |
| Trim45    | 0 | 0 | 0 | 0 | 1 | 0 | 0 | 0 | 1 | 1 | 1 |
| Trim50    | 0 | 0 | 0 | 0 | 1 | 0 | 0 | 0 | 1 | 1 | 1 |
| Trim65    | 0 | 0 | 0 | 0 | 1 | 0 | 0 | 0 | 1 | 1 | 1 |
| Trim66    | 0 | 0 | 0 | 0 | 1 | 0 | 0 | 0 | 1 | 1 | 1 |
| Trim71    | 0 | 0 | 0 | 0 | 1 | 0 | 0 | 0 | 1 | 1 | 1 |
| Trio      | 0 | 0 | 0 | 0 | 1 | 0 | 0 | 0 | 1 | 1 | 1 |
| Triobp    | 0 | 0 | 0 | 0 | 1 | 0 | 0 | 0 | 1 | 1 | 1 |
| Trip11    | 0 | 0 | 0 | 0 | 1 | 0 | 0 | 0 | 1 | 1 | 1 |
| Trmt2a    | 0 | 0 | 0 | 0 | 1 | 0 | 0 | 0 | 1 | 1 | 1 |
| Troap     | 0 | 0 | 0 | 0 | 1 | 0 | 0 | 0 | 1 | 1 | 1 |
| Trp53inp2 | 0 | 0 | 0 | 0 | 1 | 0 | 0 | 0 | 1 | 1 | 1 |
| Trpc6     | 0 | 0 | 0 | 0 | 1 | 0 | 0 | 0 | 1 | 1 | 1 |
| Trpm1     | 0 | 0 | 0 | 0 | 1 | 0 | 0 | 0 | 1 | 1 | 1 |
| Trpm4     | 0 | 0 | 0 | 0 | 1 | 0 | 0 | 0 | 1 | 1 | 1 |
| Try5      | 0 | 0 | 0 | 0 | 1 | 0 | 0 | 0 | 1 | 1 | 1 |
| Tsc2      | 0 | 0 | 0 | 0 | 1 | 0 | 0 | 0 | 1 | 1 | 1 |
| Tsc22d1   | 0 | 0 | 0 | 0 | 1 | 0 | 0 | 0 | 1 | 1 | 1 |
| Tsen2     | 0 | 0 | 0 | 0 | 1 | 0 | 0 | 0 | 1 | 1 | 1 |
| Tsnax     | 0 | 0 | 0 | 0 | 1 | 0 | 0 | 0 | 1 | 1 | 1 |
| Tsnaxip1  | 0 | 0 | 0 | 0 | 1 | 0 | 0 | 0 | 1 | 1 | 1 |
| Tspan31   | 0 | 0 | 0 | 0 | 1 | 0 | 0 | 0 | 1 | 1 | 1 |
| Tspan4    | 0 | 0 | 0 | 0 | 0 | 0 | 1 | 0 | 1 | 1 | 1 |
| Tspan8    | 0 | 0 | 0 | 0 | 1 | 0 | 0 | 0 | 1 | 1 | 1 |
| Tspyl2    | 0 | 0 | 0 | 0 | 1 | 0 | 0 | 0 | 1 | 1 | 1 |
| Tspyl3    | 0 | 0 | 0 | 0 | 1 | 0 | 0 | 0 | 1 | 1 | 1 |

|         |   |   |   |   |   |   |   |   |   |   |   |
|---------|---|---|---|---|---|---|---|---|---|---|---|
| Tssc4   | 0 | 0 | 0 | 0 | 1 | 0 | 0 | 0 | 1 | 1 | 1 |
| Tstd3   | 0 | 0 | 0 | 0 | 1 | 0 | 0 | 0 | 1 | 1 | 1 |
| Ttc19   | 0 | 0 | 0 | 0 | 1 | 0 | 0 | 0 | 1 | 1 | 1 |
| Ttc23   | 0 | 0 | 0 | 0 | 1 | 0 | 0 | 0 | 1 | 1 | 1 |
| Ttc28   | 0 | 0 | 0 | 0 | 1 | 0 | 0 | 0 | 1 | 1 | 1 |
| Ttc30b  | 0 | 0 | 0 | 0 | 1 | 0 | 0 | 0 | 1 | 1 | 1 |
| Ttc34   | 0 | 0 | 0 | 0 | 1 | 0 | 0 | 0 | 1 | 1 | 1 |
| Ttc39b  | 0 | 0 | 0 | 0 | 1 | 0 | 0 | 0 | 1 | 1 | 1 |
| Ttc4    | 0 | 0 | 0 | 0 | 1 | 0 | 0 | 0 | 1 | 1 | 1 |
| Ttc8    | 0 | 0 | 0 | 0 | 0 | 1 | 0 | 0 | 1 | 1 | 1 |
| Ttf1    | 0 | 0 | 0 | 0 | 1 | 0 | 0 | 0 | 1 | 1 | 1 |
| Tti1    | 0 | 0 | 0 | 0 | 1 | 0 | 0 | 0 | 1 | 1 | 1 |
| Ttl6    | 0 | 0 | 0 | 0 | 1 | 0 | 0 | 0 | 1 | 1 | 1 |
| Ttpa    | 0 | 0 | 0 | 0 | 1 | 0 | 0 | 0 | 1 | 1 | 1 |
| Tuba8   | 0 | 0 | 0 | 0 | 1 | 0 | 0 | 0 | 1 | 1 | 1 |
| Tubb4b  | 0 | 0 | 0 | 0 | 1 | 0 | 0 | 0 | 1 | 1 | 1 |
| Tuft1   | 0 | 0 | 0 | 0 | 1 | 0 | 0 | 0 | 1 | 1 | 1 |
| Tulp2   | 0 | 0 | 0 | 0 | 1 | 0 | 0 | 0 | 1 | 1 | 1 |
| Tulp4   | 0 | 0 | 0 | 0 | 1 | 0 | 0 | 0 | 1 | 1 | 1 |
| Txndc11 | 0 | 0 | 0 | 0 | 1 | 0 | 0 | 0 | 1 | 1 | 1 |
| Txndc16 | 0 | 0 | 0 | 0 | 1 | 0 | 0 | 0 | 1 | 1 | 1 |
| Txnrd3  | 0 | 0 | 0 | 0 | 1 | 0 | 0 | 0 | 1 | 1 | 1 |
| Tyk2    | 0 | 0 | 0 | 0 | 1 | 0 | 0 | 0 | 1 | 1 | 1 |
| U2surp  | 0 | 0 | 0 | 0 | 1 | 0 | 0 | 0 | 1 | 1 | 1 |
| Uaca    | 0 | 0 | 0 | 0 | 1 | 0 | 0 | 0 | 1 | 1 | 1 |
| Ube2e2  | 0 | 0 | 0 | 0 | 1 | 0 | 0 | 0 | 1 | 1 | 1 |
| Ube2u   | 0 | 0 | 0 | 0 | 1 | 0 | 0 | 0 | 1 | 1 | 1 |
| Ube3b   | 0 | 0 | 0 | 0 | 0 | 0 | 1 | 0 | 1 | 1 | 1 |
| Ube3c   | 0 | 0 | 0 | 0 | 1 | 0 | 0 | 0 | 1 | 1 | 1 |
| Ubfd1   | 0 | 0 | 0 | 0 | 1 | 0 | 0 | 0 | 1 | 1 | 1 |
| Ubqln3  | 0 | 0 | 0 | 0 | 1 | 0 | 0 | 0 | 1 | 1 | 1 |
| Ubr3    | 0 | 0 | 0 | 0 | 1 | 0 | 0 | 0 | 1 | 1 | 1 |
| Ubxn10  | 0 | 0 | 0 | 0 | 1 | 0 | 0 | 0 | 1 | 1 | 1 |



|           |   |   |   |   |   |   |   |   |   |   |   |
|-----------|---|---|---|---|---|---|---|---|---|---|---|
| Ubxn11    | 0 | 0 | 0 | 0 | 1 | 0 | 0 | 0 | 1 | 1 | 1 |
| Ubxn2a    | 0 | 0 | 0 | 0 | 1 | 0 | 0 | 0 | 1 | 1 | 1 |
| Ufl1      | 0 | 0 | 0 | 0 | 1 | 0 | 0 | 0 | 1 | 1 | 1 |
| Ugt1a1    | 0 | 0 | 0 | 0 | 1 | 0 | 0 | 0 | 1 | 1 | 1 |
| Ugt2b38   | 0 | 0 | 0 | 0 | 1 | 0 | 0 | 0 | 1 | 1 | 1 |
| Ugt3a2    | 0 | 0 | 0 | 0 | 1 | 0 | 0 | 0 | 1 | 1 | 1 |
| Uhrf1     | 0 | 0 | 0 | 0 | 1 | 0 | 0 | 0 | 1 | 1 | 1 |
| Uhrf1bp1l | 0 | 0 | 0 | 0 | 1 | 0 | 0 | 0 | 1 | 1 | 1 |
| Ulk4      | 0 | 0 | 0 | 0 | 1 | 0 | 0 | 0 | 1 | 1 | 1 |
| Umps      | 0 | 0 | 0 | 0 | 1 | 0 | 0 | 0 | 1 | 1 | 1 |
| Unc13a    | 0 | 0 | 0 | 0 | 1 | 0 | 0 | 0 | 1 | 1 | 1 |
| Unc13c    | 0 | 0 | 0 | 0 | 1 | 0 | 0 | 0 | 1 | 1 | 1 |
| Unc13d    | 0 | 0 | 0 | 0 | 1 | 0 | 0 | 0 | 1 | 1 | 1 |
| Unc5d     | 0 | 0 | 0 | 0 | 1 | 0 | 0 | 0 | 1 | 1 | 1 |
| Upf2      | 0 | 0 | 0 | 0 | 1 | 0 | 0 | 0 | 1 | 1 | 1 |
| Upk3a     | 0 | 0 | 0 | 0 | 1 | 0 | 0 | 0 | 1 | 1 | 1 |
| Upp2      | 0 | 0 | 0 | 0 | 1 | 0 | 0 | 0 | 1 | 1 | 1 |
| Uprt      | 0 | 0 | 0 | 0 | 1 | 0 | 0 | 0 | 1 | 1 | 1 |
| Urgcp     | 0 | 0 | 0 | 0 | 1 | 0 | 0 | 0 | 1 | 1 | 1 |
| Uros      | 0 | 0 | 0 | 0 | 1 | 0 | 0 | 0 | 1 | 1 | 1 |
| Ush1c     | 0 | 0 | 0 | 0 | 1 | 0 | 0 | 0 | 1 | 1 | 1 |
| Usp1      | 0 | 0 | 0 | 0 | 1 | 0 | 0 | 0 | 1 | 1 | 1 |
| Usp10     | 0 | 0 | 0 | 0 | 1 | 0 | 0 | 0 | 1 | 1 | 1 |
| Usp11     | 0 | 0 | 0 | 0 | 1 | 0 | 0 | 0 | 1 | 1 | 1 |
| Usp12     | 0 | 0 | 0 | 0 | 0 | 0 | 1 | 0 | 1 | 1 | 1 |
| Usp17la   | 0 | 0 | 0 | 0 | 1 | 0 | 0 | 0 | 1 | 1 | 1 |
| Usp17lc   | 0 | 0 | 0 | 0 | 1 | 0 | 0 | 0 | 1 | 1 | 1 |
| Usp17ld   | 0 | 0 | 0 | 0 | 0 | 1 | 0 | 0 | 1 | 1 | 1 |
| Usp21     | 0 | 0 | 0 | 0 | 1 | 0 | 0 | 0 | 1 | 1 | 1 |
| Usp24     | 0 | 0 | 0 | 0 | 0 | 0 | 1 | 0 | 1 | 1 | 1 |
| Usp26     | 0 | 0 | 0 | 0 | 1 | 0 | 0 | 0 | 1 | 1 | 1 |
| Usp29     | 0 | 0 | 0 | 0 | 1 | 0 | 0 | 0 | 1 | 1 | 1 |
| Usp32     | 0 | 0 | 0 | 0 | 1 | 0 | 0 | 0 | 1 | 1 | 1 |

|          |   |   |   |   |   |   |   |   |   |   |   |
|----------|---|---|---|---|---|---|---|---|---|---|---|
| Usp48    | 0 | 0 | 0 | 0 | 1 | 0 | 0 | 0 | 1 | 1 | 1 |
| Usp9y    | 0 | 0 | 0 | 0 | 1 | 0 | 0 | 0 | 1 | 1 | 1 |
| Uspl1    | 0 | 0 | 0 | 0 | 1 | 0 | 0 | 0 | 1 | 1 | 1 |
| Utp6     | 0 | 0 | 0 | 0 | 1 | 0 | 0 | 0 | 1 | 1 | 1 |
| Vamp4    | 0 | 0 | 0 | 0 | 1 | 0 | 0 | 0 | 1 | 1 | 1 |
| Vars2    | 0 | 0 | 0 | 0 | 1 | 0 | 0 | 0 | 1 | 1 | 1 |
| Vasp     | 0 | 0 | 0 | 0 | 1 | 0 | 0 | 0 | 1 | 1 | 1 |
| Vav3     | 0 | 0 | 0 | 0 | 1 | 0 | 0 | 0 | 1 | 1 | 1 |
| Vcpip1   | 0 | 0 | 0 | 0 | 1 | 0 | 0 | 0 | 1 | 1 | 1 |
| Vdac2    | 0 | 0 | 0 | 0 | 1 | 0 | 0 | 0 | 1 | 1 | 1 |
| Vegfd    | 0 | 0 | 0 | 0 | 1 | 0 | 0 | 0 | 1 | 1 | 1 |
| Vldlr    | 0 | 0 | 0 | 0 | 1 | 0 | 0 | 0 | 1 | 1 | 1 |
| Vmn1r192 | 0 | 0 | 0 | 0 | 1 | 0 | 0 | 0 | 1 | 1 | 1 |
| Vmn1r2   | 0 | 0 | 0 | 0 | 1 | 0 | 0 | 0 | 1 | 1 | 1 |
| Vmn1r200 | 0 | 0 | 0 | 0 | 1 | 0 | 0 | 0 | 1 | 1 | 1 |
| Vmn1r201 | 0 | 0 | 0 | 0 | 1 | 0 | 0 | 0 | 1 | 1 | 1 |
| Vmn1r23  | 0 | 0 | 0 | 0 | 1 | 0 | 0 | 0 | 1 | 1 | 1 |
| Vmn1r232 | 0 | 0 | 0 | 0 | 0 | 1 | 0 | 0 | 1 | 1 | 1 |
| Vmn1r27  | 0 | 0 | 0 | 0 | 1 | 0 | 0 | 0 | 1 | 1 | 1 |
| Vmn1r30  | 0 | 0 | 0 | 0 | 1 | 0 | 0 | 0 | 1 | 1 | 1 |
| Vmn1r35  | 0 | 0 | 0 | 0 | 1 | 0 | 0 | 0 | 1 | 1 | 1 |
| Vmn1r36  | 0 | 0 | 0 | 0 | 1 | 0 | 0 | 0 | 1 | 1 | 1 |
| Vmn1r38  | 0 | 0 | 0 | 0 | 1 | 0 | 0 | 0 | 1 | 1 | 1 |
| Vmn1r48  | 0 | 0 | 0 | 0 | 1 | 0 | 0 | 0 | 1 | 1 | 1 |
| Vmn1r6   | 0 | 0 | 0 | 0 | 1 | 0 | 0 | 0 | 1 | 1 | 1 |
| Vmn1r67  | 0 | 0 | 0 | 0 | 1 | 0 | 0 | 0 | 1 | 1 | 1 |
| Vmn1r73  | 0 | 0 | 0 | 0 | 1 | 0 | 0 | 0 | 1 | 1 | 1 |
| Vmn1r87  | 0 | 0 | 0 | 0 | 1 | 0 | 0 | 0 | 1 | 1 | 1 |
| Vmn2r100 | 0 | 0 | 0 | 0 | 1 | 0 | 0 | 0 | 1 | 1 | 1 |
| Vmn2r108 | 0 | 0 | 0 | 0 | 1 | 0 | 0 | 0 | 1 | 1 | 1 |
| Vmn2r109 | 0 | 0 | 0 | 0 | 1 | 0 | 0 | 0 | 1 | 1 | 1 |
| Vmn2r110 | 0 | 0 | 0 | 0 | 1 | 0 | 0 | 0 | 1 | 1 | 1 |
| Vmn2r112 | 0 | 0 | 0 | 0 | 1 | 0 | 0 | 0 | 1 | 1 | 1 |

|          |   |   |   |   |   |   |   |   |   |   |   |
|----------|---|---|---|---|---|---|---|---|---|---|---|
| Vmn2r115 | 0 | 0 | 0 | 0 | 1 | 0 | 0 | 0 | 1 | 1 | 1 |
| Vmn2r116 | 0 | 0 | 0 | 0 | 1 | 0 | 0 | 0 | 1 | 1 | 1 |
| Vmn2r15  | 0 | 0 | 0 | 0 | 1 | 0 | 0 | 0 | 1 | 1 | 1 |
| Vmn2r2   | 0 | 0 | 0 | 0 | 1 | 0 | 0 | 0 | 1 | 1 | 1 |
| Vmn2r25  | 0 | 0 | 0 | 0 | 1 | 0 | 0 | 0 | 1 | 1 | 1 |
| Vmn2r28  | 0 | 0 | 0 | 0 | 1 | 0 | 0 | 0 | 1 | 1 | 1 |
| Vmn2r29  | 0 | 0 | 0 | 0 | 1 | 0 | 0 | 0 | 1 | 1 | 1 |
| Vmn2r30  | 0 | 0 | 0 | 0 | 1 | 0 | 0 | 0 | 1 | 1 | 1 |
| Vmn2r31  | 0 | 0 | 0 | 0 | 1 | 0 | 0 | 0 | 1 | 1 | 1 |
| Vmn2r34  | 0 | 0 | 0 | 0 | 0 | 1 | 0 | 0 | 1 | 1 | 1 |
| Vmn2r38  | 0 | 0 | 0 | 0 | 1 | 0 | 0 | 0 | 1 | 1 | 1 |
| Vmn2r39  | 0 | 0 | 0 | 0 | 1 | 0 | 0 | 0 | 1 | 1 | 1 |
| Vmn2r52  | 0 | 0 | 0 | 0 | 1 | 0 | 0 | 0 | 1 | 1 | 1 |
| Vmn2r54  | 0 | 0 | 0 | 0 | 1 | 0 | 0 | 0 | 1 | 1 | 1 |
| Vmn2r61  | 0 | 0 | 0 | 0 | 1 | 0 | 0 | 0 | 1 | 1 | 1 |
| Vmn2r63  | 0 | 0 | 0 | 0 | 1 | 0 | 0 | 0 | 1 | 1 | 1 |
| Vmn2r65  | 0 | 0 | 0 | 0 | 1 | 0 | 0 | 0 | 1 | 1 | 1 |
| Vmn2r7   | 0 | 0 | 0 | 0 | 1 | 0 | 0 | 0 | 1 | 1 | 1 |
| Vmn2r70  | 0 | 0 | 0 | 0 | 1 | 0 | 0 | 0 | 1 | 1 | 1 |
| Vmn2r74  | 0 | 0 | 0 | 0 | 1 | 0 | 0 | 0 | 1 | 1 | 1 |
| Vmn2r78  | 0 | 0 | 0 | 0 | 1 | 0 | 0 | 0 | 1 | 1 | 1 |
| Vmn2r80  | 0 | 0 | 0 | 0 | 0 | 1 | 0 | 0 | 1 | 1 | 1 |
| Vmn2r84  | 0 | 0 | 0 | 0 | 1 | 0 | 0 | 0 | 1 | 1 | 1 |
| Vmn2r89  | 0 | 0 | 0 | 0 | 1 | 0 | 0 | 0 | 1 | 1 | 1 |
| Vmn2r90  | 0 | 0 | 0 | 0 | 1 | 0 | 0 | 0 | 1 | 1 | 1 |
| Vmn2r91  | 0 | 0 | 0 | 0 | 1 | 0 | 0 | 0 | 1 | 1 | 1 |
| Vps11    | 0 | 0 | 0 | 0 | 1 | 0 | 0 | 0 | 1 | 1 | 1 |
| Vps13d   | 0 | 0 | 0 | 0 | 1 | 0 | 0 | 0 | 1 | 1 | 1 |
| Vps33b   | 0 | 0 | 0 | 0 | 1 | 0 | 0 | 0 | 1 | 1 | 1 |
| Vps37b   | 0 | 0 | 0 | 0 | 1 | 0 | 0 | 0 | 1 | 1 | 1 |
| Vps39    | 0 | 0 | 0 | 0 | 1 | 0 | 0 | 0 | 1 | 1 | 1 |
| Vps54    | 0 | 0 | 0 | 0 | 1 | 0 | 0 | 0 | 1 | 1 | 1 |
| Vsx1     | 0 | 0 | 0 | 0 | 1 | 0 | 0 | 0 | 1 | 1 | 1 |

|        |   |   |   |   |   |   |   |   |   |   |   |
|--------|---|---|---|---|---|---|---|---|---|---|---|
| Vtcn1  | 0 | 0 | 0 | 0 | 1 | 0 | 0 | 0 | 1 | 1 | 1 |
| Vwa1   | 0 | 0 | 0 | 0 | 1 | 0 | 0 | 0 | 1 | 1 | 1 |
| Vwa3a  | 0 | 0 | 0 | 0 | 1 | 0 | 0 | 0 | 1 | 1 | 1 |
| Wapl   | 0 | 0 | 0 | 0 | 0 | 1 | 0 | 0 | 1 | 1 | 1 |
| Wasf1  | 0 | 0 | 0 | 0 | 0 | 1 | 0 | 0 | 1 | 1 | 1 |
| Wasf3  | 0 | 0 | 0 | 0 | 1 | 0 | 0 | 0 | 1 | 1 | 1 |
| Washc1 | 0 | 0 | 0 | 0 | 1 | 0 | 0 | 0 | 1 | 1 | 1 |
| Washc2 | 0 | 0 | 0 | 0 | 1 | 0 | 0 | 0 | 1 | 1 | 1 |
| Wbp11  | 0 | 0 | 0 | 0 | 1 | 0 | 0 | 0 | 1 | 1 | 1 |
| Wbp2   | 0 | 0 | 0 | 0 | 1 | 0 | 0 | 0 | 1 | 1 | 1 |
| Wdfy4  | 0 | 0 | 0 | 0 | 1 | 0 | 0 | 0 | 1 | 1 | 1 |
| Wdhd1  | 0 | 0 | 0 | 0 | 1 | 0 | 0 | 0 | 1 | 1 | 1 |
| Wdr34  | 0 | 0 | 0 | 0 | 1 | 0 | 0 | 0 | 1 | 1 | 1 |
| Wdr38  | 0 | 0 | 0 | 0 | 1 | 0 | 0 | 0 | 1 | 1 | 1 |
| Wdr47  | 0 | 0 | 0 | 0 | 0 | 0 | 1 | 0 | 1 | 1 | 1 |
| Wdr53  | 0 | 0 | 0 | 0 | 1 | 0 | 0 | 0 | 1 | 1 | 1 |
| Wdr6   | 0 | 0 | 0 | 0 | 1 | 0 | 0 | 0 | 1 | 1 | 1 |
| Wdr66  | 0 | 0 | 0 | 0 | 1 | 0 | 0 | 0 | 1 | 1 | 1 |
| Wdr76  | 0 | 0 | 0 | 0 | 1 | 0 | 0 | 0 | 1 | 1 | 1 |
| Wdr81  | 0 | 0 | 0 | 0 | 1 | 0 | 0 | 0 | 1 | 1 | 1 |
| Wdr89  | 0 | 0 | 0 | 0 | 1 | 0 | 0 | 0 | 1 | 1 | 1 |
| Wdr91  | 0 | 0 | 0 | 0 | 1 | 0 | 0 | 0 | 1 | 1 | 1 |
| Wdr93  | 0 | 0 | 0 | 0 | 0 | 0 | 1 | 0 | 1 | 1 | 1 |
| Wee1   | 0 | 0 | 0 | 0 | 1 | 0 | 0 | 0 | 1 | 1 | 1 |
| Wipf2  | 0 | 0 | 0 | 0 | 1 | 0 | 0 | 0 | 1 | 1 | 1 |
| Wls    | 0 | 0 | 0 | 0 | 0 | 1 | 0 | 0 | 1 | 1 | 1 |
| Wnk1   | 0 | 0 | 0 | 0 | 1 | 0 | 0 | 0 | 1 | 1 | 1 |
| Wnt1   | 0 | 0 | 0 | 0 | 1 | 0 | 0 | 0 | 1 | 1 | 1 |
| Wnt7b  | 0 | 0 | 0 | 0 | 0 | 1 | 0 | 0 | 1 | 1 | 1 |
| Wwc2   | 0 | 0 | 0 | 0 | 1 | 0 | 0 | 0 | 1 | 1 | 1 |
| Wwp1   | 0 | 0 | 0 | 0 | 1 | 0 | 0 | 0 | 1 | 1 | 1 |
| Xiap   | 0 | 0 | 0 | 0 | 0 | 1 | 0 | 0 | 1 | 1 | 1 |
| Xk     | 0 | 0 | 0 | 0 | 1 | 0 | 0 | 0 | 1 | 1 | 1 |

|         |   |   |   |   |   |   |   |   |   |   |   |
|---------|---|---|---|---|---|---|---|---|---|---|---|
| Xkr4    | 0 | 0 | 0 | 0 | 0 | 1 | 0 | 0 | 1 | 1 | 1 |
| Xkr8    | 0 | 0 | 0 | 0 | 1 | 0 | 0 | 0 | 1 | 1 | 1 |
| Xntrpc  | 0 | 0 | 0 | 0 | 1 | 0 | 0 | 0 | 1 | 1 | 1 |
| Xpc     | 0 | 0 | 0 | 0 | 1 | 0 | 0 | 0 | 1 | 1 | 1 |
| Xpnpep3 | 0 | 0 | 0 | 0 | 1 | 0 | 0 | 0 | 1 | 1 | 1 |
| Xpo4    | 0 | 0 | 0 | 0 | 1 | 0 | 0 | 0 | 1 | 1 | 1 |
| Xylb    | 0 | 0 | 0 | 0 | 1 | 0 | 0 | 0 | 1 | 1 | 1 |
| Xylt1   | 0 | 0 | 0 | 0 | 0 | 1 | 0 | 0 | 1 | 1 | 1 |
| Yars    | 0 | 0 | 0 | 0 | 1 | 0 | 0 | 0 | 1 | 1 | 1 |
| Ythdc1  | 0 | 0 | 0 | 0 | 0 | 0 | 1 | 0 | 1 | 1 | 1 |
| Ythdc2  | 0 | 0 | 0 | 0 | 1 | 0 | 0 | 0 | 1 | 1 | 1 |
| Ythdf2  | 0 | 0 | 0 | 0 | 0 | 1 | 0 | 0 | 1 | 1 | 1 |
| Zan     | 0 | 0 | 0 | 0 | 1 | 0 | 0 | 0 | 1 | 1 | 1 |
| Zbtb39  | 0 | 0 | 0 | 0 | 1 | 0 | 0 | 0 | 1 | 1 | 1 |
| Zbtb40  | 0 | 0 | 0 | 0 | 1 | 0 | 0 | 0 | 1 | 1 | 1 |
| Zbtb41  | 0 | 0 | 0 | 0 | 1 | 0 | 0 | 0 | 1 | 1 | 1 |
| Zbtb8a  | 0 | 0 | 0 | 0 | 1 | 0 | 0 | 0 | 1 | 1 | 1 |
| Zbtb8b  | 0 | 0 | 0 | 0 | 1 | 0 | 0 | 0 | 1 | 1 | 1 |
| Zbtb9   | 0 | 0 | 0 | 0 | 1 | 0 | 0 | 0 | 1 | 1 | 1 |
| Zc3h3   | 0 | 0 | 0 | 0 | 1 | 0 | 0 | 0 | 1 | 1 | 1 |
| Zc3hav1 | 0 | 0 | 0 | 0 | 1 | 0 | 0 | 0 | 1 | 1 | 1 |
| Zdhhc16 | 0 | 0 | 0 | 0 | 1 | 0 | 0 | 0 | 1 | 1 | 1 |
| Zdhhc18 | 0 | 0 | 0 | 0 | 1 | 0 | 0 | 0 | 1 | 1 | 1 |
| Zfand4  | 0 | 0 | 0 | 0 | 1 | 0 | 0 | 0 | 1 | 1 | 1 |
| Zfhx3   | 0 | 0 | 0 | 0 | 1 | 0 | 0 | 0 | 1 | 1 | 1 |
| Zfhx4   | 0 | 0 | 0 | 0 | 1 | 0 | 0 | 0 | 1 | 1 | 1 |
| Zfp101  | 0 | 0 | 0 | 0 | 1 | 0 | 0 | 0 | 1 | 1 | 1 |
| Zfp106  | 0 | 0 | 0 | 0 | 1 | 0 | 0 | 0 | 1 | 1 | 1 |
| Zfp128  | 0 | 0 | 0 | 0 | 1 | 0 | 0 | 0 | 1 | 1 | 1 |
| Zfp13   | 0 | 0 | 0 | 0 | 1 | 0 | 0 | 0 | 1 | 1 | 1 |
| Zfp142  | 0 | 0 | 0 | 0 | 1 | 0 | 0 | 0 | 1 | 1 | 1 |
| Zfp202  | 0 | 0 | 0 | 0 | 1 | 0 | 0 | 0 | 1 | 1 | 1 |
| Zfp212  | 0 | 0 | 0 | 0 | 1 | 0 | 0 | 0 | 1 | 1 | 1 |

|         |   |   |   |   |   |   |   |   |   |   |   |
|---------|---|---|---|---|---|---|---|---|---|---|---|
| Zfp281  | 0 | 0 | 0 | 0 | 1 | 0 | 0 | 0 | 1 | 1 | 1 |
| Zfp318  | 0 | 0 | 0 | 0 | 1 | 0 | 0 | 0 | 1 | 1 | 1 |
| Zfp345  | 0 | 0 | 0 | 0 | 1 | 0 | 0 | 0 | 1 | 1 | 1 |
| Zfp354b | 0 | 0 | 0 | 0 | 1 | 0 | 0 | 0 | 1 | 1 | 1 |
| Zfp36   | 0 | 0 | 0 | 0 | 1 | 0 | 0 | 0 | 1 | 1 | 1 |
| Zfp366  | 0 | 0 | 0 | 0 | 1 | 0 | 0 | 0 | 1 | 1 | 1 |
| Zfp3613 | 0 | 0 | 0 | 0 | 1 | 0 | 0 | 0 | 1 | 1 | 1 |
| Zfp385c | 0 | 0 | 0 | 0 | 1 | 0 | 0 | 0 | 1 | 1 | 1 |
| Zfp407  | 0 | 0 | 0 | 0 | 1 | 0 | 0 | 0 | 1 | 1 | 1 |
| Zfp42   | 0 | 0 | 0 | 0 | 1 | 0 | 0 | 0 | 1 | 1 | 1 |
| Zfp426  | 0 | 0 | 0 | 0 | 1 | 0 | 0 | 0 | 1 | 1 | 1 |
| Zfp428  | 0 | 0 | 0 | 0 | 1 | 0 | 0 | 0 | 1 | 1 | 1 |
| Zfp438  | 0 | 0 | 0 | 0 | 1 | 0 | 0 | 0 | 1 | 1 | 1 |
| Zfp472  | 0 | 0 | 0 | 0 | 1 | 0 | 0 | 0 | 1 | 1 | 1 |
| Zfp474  | 0 | 0 | 0 | 0 | 0 | 1 | 0 | 0 | 1 | 1 | 1 |
| Zfp512b | 0 | 0 | 0 | 0 | 1 | 0 | 0 | 0 | 1 | 1 | 1 |
| Zfp516  | 0 | 0 | 0 | 0 | 1 | 0 | 0 | 0 | 1 | 1 | 1 |
| Zfp574  | 0 | 0 | 0 | 0 | 1 | 0 | 0 | 0 | 1 | 1 | 1 |
| Zfp61   | 0 | 0 | 0 | 0 | 1 | 0 | 0 | 0 | 1 | 1 | 1 |
| Zfp638  | 0 | 0 | 0 | 0 | 1 | 0 | 0 | 0 | 1 | 1 | 1 |
| Zfp64   | 0 | 0 | 0 | 0 | 1 | 0 | 0 | 0 | 1 | 1 | 1 |
| Zfp652  | 0 | 0 | 0 | 0 | 1 | 0 | 0 | 0 | 1 | 1 | 1 |
| Zfp687  | 0 | 0 | 0 | 0 | 1 | 0 | 0 | 0 | 1 | 1 | 1 |
| Zfp775  | 0 | 0 | 0 | 0 | 1 | 0 | 0 | 0 | 1 | 1 | 1 |
| Zfp787  | 0 | 0 | 0 | 0 | 1 | 0 | 0 | 0 | 1 | 1 | 1 |
| Zfp804a | 0 | 0 | 0 | 0 | 1 | 0 | 0 | 0 | 1 | 1 | 1 |
| Zfp821  | 0 | 0 | 0 | 0 | 1 | 0 | 0 | 0 | 1 | 1 | 1 |
| Zfp831  | 0 | 0 | 0 | 0 | 1 | 0 | 0 | 0 | 1 | 1 | 1 |
| Zfp839  | 0 | 0 | 0 | 0 | 1 | 0 | 0 | 0 | 1 | 1 | 1 |
| Zfp87   | 0 | 0 | 0 | 0 | 1 | 0 | 0 | 0 | 1 | 1 | 1 |
| Zfp874a | 0 | 0 | 0 | 0 | 1 | 0 | 0 | 0 | 1 | 1 | 1 |
| Zfp978  | 0 | 0 | 0 | 0 | 1 | 0 | 0 | 0 | 1 | 1 | 1 |
| Zfp981  | 0 | 0 | 0 | 0 | 1 | 0 | 0 | 0 | 1 | 1 | 1 |

|         |   |   |   |   |   |   |   |   |   |   |   |
|---------|---|---|---|---|---|---|---|---|---|---|---|
| Zfr     | 0 | 0 | 0 | 0 | 1 | 0 | 0 | 0 | 1 | 1 | 1 |
| Zfy1    | 0 | 0 | 0 | 0 | 1 | 0 | 0 | 0 | 1 | 1 | 1 |
| Zfyve1  | 0 | 0 | 0 | 0 | 1 | 0 | 0 | 0 | 1 | 1 | 1 |
| Zic1    | 0 | 0 | 0 | 0 | 1 | 0 | 0 | 0 | 1 | 1 | 1 |
| Zic4    | 0 | 0 | 0 | 0 | 1 | 0 | 0 | 0 | 1 | 1 | 1 |
| Zkscan3 | 0 | 0 | 0 | 0 | 1 | 0 | 0 | 0 | 1 | 1 | 1 |
| Zkscan4 | 0 | 0 | 0 | 0 | 1 | 0 | 0 | 0 | 1 | 1 | 1 |
| Zkscan7 | 0 | 0 | 0 | 0 | 1 | 0 | 0 | 0 | 1 | 1 | 1 |
| Zmym1   | 0 | 0 | 0 | 0 | 1 | 0 | 0 | 0 | 1 | 1 | 1 |
| Znfx1   | 0 | 0 | 0 | 0 | 1 | 0 | 0 | 0 | 1 | 1 | 1 |
| Znhit6  | 1 | 0 | 0 | 0 | 0 | 0 | 0 | 0 | 1 | 1 | 1 |
| Zscan10 | 0 | 0 | 0 | 0 | 1 | 0 | 0 | 0 | 1 | 1 | 1 |
| Zscan22 | 0 | 0 | 0 | 0 | 1 | 0 | 0 | 0 | 1 | 1 | 1 |
| Zyx     | 0 | 0 | 0 | 0 | 1 | 0 | 0 | 0 | 1 | 1 | 1 |
| Zzz3    | 0 | 0 | 0 | 0 | 1 | 0 | 0 | 0 | 1 | 1 | 1 |

| DO                                                         | p_val_FET   | p_val_adj   | n_genes | genes_mutated                                              |
|------------------------------------------------------------|-------------|-------------|---------|------------------------------------------------------------|
| breast cancer                                              | 0.000829497 | 0.099947882 | 7       | Apc,Bard1,Brca1,Cav1,ErbB2,Pik3ca,Trp53                    |
| osteogenesis imperfecta type 3                             | 0.001030391 | 0.099947882 | 3       | Col1a1,Col1a2,Smpd3                                        |
| urinary bladder cancer                                     | 0.001030391 | 0.099947882 | 3       | Ctnnb1,Ncstn,Pten                                          |
| aceruloplasminemia                                         | 0.101045461 | 0.162454305 | 1       | Cp                                                         |
| achondrogenesis type IA                                    | 0.101045461 | 0.162454305 | 1       | Trip11                                                     |
| achondrogenesis type II                                    | 0.101045461 | 0.162454305 | 1       | Col2a1                                                     |
| acute lymphocytic leukemia                                 | 0.00880707  | 0.162454305 | 3       | Kmt2a,Notch3,Pten                                          |
| age related macular degeneration 4                         | 0.101045461 | 0.162454305 | 1       | Cfh                                                        |
| age related macular degeneration 9                         | 0.101045461 | 0.162454305 | 1       | C3                                                         |
| aggressive periodontitis                                   | 0.101045461 | 0.162454305 | 1       | Postn                                                      |
| Alstrom syndrome                                           | 0.101045461 | 0.162454305 | 1       | Alms1                                                      |
| arrhythmogenic right ventricular dysplasia 12              | 0.101045461 | 0.162454305 | 1       | Jup                                                        |
| asphyxiating thoracic dystrophy 1                          | 0.101045461 | 0.162454305 | 1       | Ift140                                                     |
| astrocytoma                                                | 0.101045461 | 0.162454305 | 1       | Hras                                                       |
| autism spectrum disorder                                   | 0.00520876  | 0.162454305 | 4       | Chd8,Gabrb3,Grin1,Slc9a9                                   |
| autistic disorder                                          | 0.033646487 | 0.162454305 | 9       | Arhgap32,Cadps2,Ctnnb1,Gabrb3,Nbea,Nrp2,Pten,Shank2,Shank3 |
| autosomal dominant auditory neuropathy 1                   | 0.101045461 | 0.162454305 | 1       | Diaph3                                                     |
| autosomal dominant keratitis-ichthyosis-deafness syndrome  | 0.101045461 | 0.162454305 | 1       | Gjb2                                                       |
| autosomal dominant nonsyndromic deafness 13                | 0.101045461 | 0.162454305 | 1       | Col11a2                                                    |
| autosomal dominant Parkinson's disease 8                   | 0.101045461 | 0.162454305 | 1       | Lrrk2                                                      |
| autosomal recessive limb-girdle muscular dystrophy type 2B | 0.101045461 | 0.162454305 | 1       | Dysf                                                       |
| autosomal recessive nonsyndromic deafness 2                | 0.101045461 | 0.162454305 | 1       | Atp6v1b1                                                   |
| autosomal recessive nonsyndromic deafness 3                | 0.101045461 | 0.162454305 | 1       | Myo7a                                                      |
| autosomal recessive nonsyndromic deafness 6                | 0.101045461 | 0.162454305 | 1       | Myo15                                                      |
| autosomal recessive spinocerebellar ataxia 16              | 0.101045461 | 0.162454305 | 1       | Stub1                                                      |
| Axenfeld-Rieger syndrome type 3                            | 0.101045461 | 0.162454305 | 1       | Bmp4                                                       |
| Bannayan-Riley-Ruvalcaba syndrome                          | 0.101045461 | 0.162454305 | 1       | Pten                                                       |
| Bardet-Biedl syndrome 10                                   | 0.101045461 | 0.162454305 | 1       | Bbs10                                                      |
| Bardet-Biedl syndrome 6                                    | 0.101045461 | 0.162454305 | 1       | Mkks                                                       |
| basal cell carcinoma                                       | 0.101045461 | 0.162454305 | 1       | Ptch1                                                      |
| benign neonatal seizures                                   | 0.010205888 | 0.162454305 | 2       | Kcnq2,Kcnq3                                                |
| biotinidase deficiency                                     | 0.101045461 | 0.162454305 | 1       | Btd                                                        |
| brain disease                                              | 0.101045461 | 0.162454305 | 1       | Pten                                                       |
| Brugada syndrome 7                                         | 0.101045461 | 0.162454305 | 1       | Scn3b                                                      |
| CADASIL 1                                                  | 0.101045461 | 0.162454305 | 1       | Notch3                                                     |
| campomelic dysplasia                                       | 0.101045461 | 0.162454305 | 1       | Sox9                                                       |
| Camurati-Engelmann disease                                 | 0.101045461 | 0.162454305 | 1       | Mitf                                                       |
| carnitine palmitoyltransferase I deficiency                | 0.101045461 | 0.162454305 | 1       | Cpt1a                                                      |
| cataract 1 multiple types                                  | 0.101045461 | 0.162454305 | 1       | Gja8                                                       |
| cataract 4 multiple types                                  | 0.101045461 | 0.162454305 | 1       | Crygd                                                      |
| cerebellar ataxia                                          | 0.101045461 | 0.162454305 | 1       | Cacna1a                                                    |
| cerebral cavernous malformation 3                          | 0.101045461 | 0.162454305 | 1       | Pdcd10                                                     |
| Charcot-Marie-Tooth disease axonal type 2O                 | 0.101045461 | 0.162454305 | 1       | Dync1h1                                                    |
| Charcot-Marie-Tooth disease type 2A1                       | 0.101045461 | 0.162454305 | 1       | Kif1b                                                      |
| Charcot-Marie-Tooth disease type 4D                        | 0.101045461 | 0.162454305 | 1       | Ndr1                                                       |
| CHARGE syndrome                                            | 0.028556883 | 0.162454305 | 2       | Chd2,Trp53                                                 |
| childhood electroclinical syndrome                         | 0.101045461 | 0.162454305 | 1       | Cacna1a                                                    |
| cleft palate-lateral synechia syndrome                     | 0.101045461 | 0.162454305 | 1       | Bmp4                                                       |
| CLOVES syndrome                                            | 0.101045461 | 0.162454305 | 1       | Pik3ca                                                     |
| Coffin-Siris syndrome                                      | 0.101045461 | 0.162454305 | 1       | Arid1a                                                     |
| complement component 3 deficiency                          | 0.101045461 | 0.162454305 | 1       | C3                                                         |
| cone-rod dystrophy 3                                       | 0.101045461 | 0.162454305 | 1       | Abca4                                                      |
| cone-rod dystrophy 9                                       | 0.101045461 | 0.162454305 | 1       | Adam9                                                      |
| congenital disorder of glycosylation type II               | 0.101045461 | 0.162454305 | 1       | Mgat2                                                      |
| congenital myasthenic syndrome 9                           | 0.101045461 | 0.162454305 | 1       | Musk                                                       |
| congenital stationary night blindness 1D                   | 0.101045461 | 0.162454305 | 1       | Slc24a1                                                    |
| congenital stationary night blindness 2A                   | 0.101045461 | 0.162454305 | 1       | Cacna1f                                                    |
| Costello syndrome                                          | 0.101045461 | 0.162454305 | 1       | Hras                                                       |
| Cowden syndrome                                            | 0.101045461 | 0.162454305 | 1       | Pten                                                       |
| craniofrontonasal syndrome                                 | 0.101045461 | 0.162454305 | 1       | Efnb1                                                      |
| cutis laxa                                                 | 0.028556883 | 0.162454305 | 2       | Fbln5,Ltbp4                                                |
| cystic kidney disease                                      | 0.008630401 | 0.162454305 | 4       | Cep290,Robo1,Slit2,Ttc21b                                  |
| diffuse large B-cell lymphoma                              | 0.101045461 | 0.162454305 | 1       | Trp53                                                      |
| dilated cardiomyopathy 1HH                                 | 0.101045461 | 0.162454305 | 1       | Bag3                                                       |
| distal arthrogyposis                                       | 0.028556883 | 0.162454305 | 2       | Ecel1,Fbn2                                                 |
| distal muscular dystrophy                                  | 0.101045461 | 0.162454305 | 1       | Dysf                                                       |
| Duane-radial ray syndrome                                  | 0.101045461 | 0.162454305 | 1       | Sall4                                                      |
| dyskeratosis congenita                                     | 0.028556883 | 0.162454305 | 2       | Dkc1,Trp53                                                 |
| endometrial cancer                                         | 0.053304158 | 0.162454305 | 2       | Pten,Trp53                                                 |
| enlarged vestibular aqueduct                               | 0.101045461 | 0.162454305 | 1       | Atp6v1b1                                                   |
| epidermal appendage tumor                                  | 0.101045461 | 0.162454305 | 1       | Tmem207                                                    |
| epilepsy                                                   | 0.071957457 | 0.162454305 | 3       | Bsn,Cacna2d2,Cdyl                                          |
| episodic ataxia type 2                                     | 0.101045461 | 0.162454305 | 1       | Cacna1a                                                    |
| factor XI deficiency                                       | 0.101045461 | 0.162454305 | 1       | F11                                                        |
| familial adenomatous polyposis                             | 0.101045461 | 0.162454305 | 1       | Apc                                                        |
| familial hemiplegic migraine                               | 0.101045461 | 0.162454305 | 1       | Cacna1a                                                    |
| Fraser syndrome                                            | 0.053304158 | 0.162454305 | 2       | Frem2,Grip1                                                |
| generalized dystonia                                       | 0.101045461 | 0.162454305 | 1       | Cacna1a                                                    |
| glioblastoma multiforme                                    | 0.101045461 | 0.162454305 | 1       | Trp53                                                      |
| granulosa cell tumor                                       | 0.101045461 | 0.162454305 | 1       | Ctnnb1                                                     |
| Griscelli syndrome type 1                                  | 0.101045461 | 0.162454305 | 1       | Myo5a                                                      |
| growth hormone secreting pituitary adenoma                 | 0.101045461 | 0.162454305 | 1       | Men1                                                       |
| heart disease                                              | 0.101045461 | 0.162454305 | 1       | Fbn1                                                       |
| hemolytic-uremic syndrome                                  | 0.010205888 | 0.162454305 | 2       | C3,Cfh                                                     |
| hepatocellular carcinoma                                   | 0.057298108 | 0.162454305 | 4       | Apc,Foxm1,Pten,Uaca                                        |
| hereditary neutrophilia                                    | 0.101045461 | 0.162454305 | 1       | Csf3r                                                      |
| hereditary sensory and autonomic neuropathy type 6         | 0.101045461 | 0.162454305 | 1       | Dst                                                        |
| hereditary spastic paraplegia 11                           | 0.101045461 | 0.162454305 | 1       | Spg11                                                      |



|                                                            |             |             |                                                    |
|------------------------------------------------------------|-------------|-------------|----------------------------------------------------|
| hereditary spastic paraplegia 13                           | 0.101045461 | 0.162454305 | 1 Hspd1                                            |
| hereditary spastic paraplegia 15                           | 0.101045461 | 0.162454305 | 1 Zfyve26                                          |
| hereditary spastic paraplegia 30                           | 0.101045461 | 0.162454305 | 1 Kif1a                                            |
| hereditary spherocytosis type 1                            | 0.053304158 | 0.162454305 | 2 Add2,Ank1                                        |
| Hermansky-Pudlak syndrome 5                                | 0.101045461 | 0.162454305 | 1 Hps5                                             |
| holoprosencephaly 11                                       | 0.101045461 | 0.162454305 | 1 Cdon                                             |
| Huntington's disease                                       | 0.00880707  | 0.162454305 | 3 Htt,Zdhhc13,Zdhhc17                              |
| hypopituitarism                                            | 0.053304158 | 0.162454305 | 2 Lhx3,Smpd3                                       |
| ichthyosis vulgaris                                        | 0.101045461 | 0.162454305 | 1 Lbr                                              |
| IGSF1 deficiency syndrome                                  | 0.101045461 | 0.162454305 | 1 Igsf1                                            |
| infantile myofibromatosis                                  | 0.101045461 | 0.162454305 | 1 Pdgfrb                                           |
| inflammatory bowel disease 12                              | 0.101045461 | 0.162454305 | 1 Gnai2                                            |
| isolated anhidrosis with normal sweat glands               | 0.101045461 | 0.162454305 | 1 Itpr2                                            |
| Joubert syndrome 26                                        | 0.101045461 | 0.162454305 | 1 D430042O09Rik                                    |
| Joubert syndrome 5                                         | 0.101045461 | 0.162454305 | 1 Cep290                                           |
| Joubert syndrome 7                                         | 0.101045461 | 0.162454305 | 1 Rpgrip1l                                         |
| junctional epidermolysis bullosa                           | 0.101045461 | 0.162454305 | 1 Lama3                                            |
| junctional epidermolysis bullosa non-Herlitz type          | 0.082968883 | 0.162454305 | 2 Lama3,Lamc2                                      |
| karyomegalic interstitial nephritis                        | 0.101045461 | 0.162454305 | 1 Fan1                                             |
| Lambert-Eaton myasthenic syndrome                          | 0.101045461 | 0.162454305 | 1 Cacna1a                                          |
| Laron syndrome                                             | 0.101045461 | 0.162454305 | 1 Ghr                                              |
| Leber congenital amaurosis 10                              | 0.101045461 | 0.162454305 | 1 Cep290                                           |
| Li-Fraumeni syndrome                                       | 0.101045461 | 0.162454305 | 1 Trp53                                            |
| long QT syndrome 1                                         | 0.101045461 | 0.162454305 | 1 Kcnq1                                            |
| lung cancer                                                | 0.082968883 | 0.162454305 | 2 Foxm1,Robo1                                      |
| macrocephaly-autism syndrome                               | 0.101045461 | 0.162454305 | 1 Pten                                             |
| malignant glioma                                           | 0.101045461 | 0.162454305 | 1 Hras                                             |
| meconium aspiration syndrome                               | 0.101045461 | 0.162454305 | 1 Atf2                                             |
| medium chain acyl-CoA dehydrogenase deficiency             | 0.101045461 | 0.162454305 | 1 Acadm                                            |
| mitral valve prolapse                                      | 0.101045461 | 0.162454305 | 1 Dchs1                                            |
| mosaic variegated aneuploidy syndrome 1                    | 0.101045461 | 0.162454305 | 1 Bub1b                                            |
| mucopolysaccharidosis VI                                   | 0.101045461 | 0.162454305 | 1 Arsb                                             |
| mulibrey nanism                                            | 0.101045461 | 0.162454305 | 1 Trim37                                           |
| multiple endocrine neoplasia type 1                        | 0.101045461 | 0.162454305 | 1 Men1                                             |
| myelodysplastic/myeloproliferative neoplasm                | 0.101045461 | 0.162454305 | 1 Dido1                                            |
| myeloproliferative neoplasm                                | 0.101045461 | 0.162454305 | 1 Pdgfrb                                           |
| nephrosis                                                  | 0.101045461 | 0.162454305 | 1 Lamb2                                            |
| nevoid basal cell carcinoma syndrome                       | 0.010205888 | 0.162454305 | 2 Ptch1,Sufu                                       |
| Noonan syndrome 5                                          | 0.101045461 | 0.162454305 | 1 Raf1                                             |
| ocular albinism with sensorineural deafness                | 0.101045461 | 0.162454305 | 1 Mitf                                             |
| orofacioidigital syndrome I                                | 0.101045461 | 0.162454305 | 1 Ofd1                                             |
| osteochondrodysplasia                                      | 0.101045461 | 0.162454305 | 1 Atf2                                             |
| osteogenesis imperfecta                                    | 0.028556883 | 0.162454305 | 2 Col1a2,Smpd3                                     |
| osteogenesis imperfecta type 1                             | 0.101045461 | 0.162454305 | 1 Col1a1                                           |
| osteogenesis imperfecta type 2                             | 0.010205888 | 0.162454305 | 2 Col1a1,Smpd3                                     |
| osteogenesis imperfecta type 4                             | 0.101045461 | 0.162454305 | 1 Col1a1                                           |
| osteoporosis-pseudoglioma syndrome                         | 0.101045461 | 0.162454305 | 1 Lrp5                                             |
| osteosarcoma                                               | 0.101045461 | 0.162454305 | 1 Trp53                                            |
| otospondylomegapiphyseal dysplasia                         | 0.101045461 | 0.162454305 | 1 Col11a2                                          |
| ovarian cancer                                             | 0.010205888 | 0.162454305 | 2 Apc,Ctnnb1                                       |
| Parkinson's disease 17                                     | 0.101045461 | 0.162454305 | 1 Vps35                                            |
| Pelger-Huet anomaly                                        | 0.101045461 | 0.162454305 | 1 Lbr                                              |
| peripheral T-cell lymphoma                                 | 0.101045461 | 0.162454305 | 1 Rc3h1                                            |
| photosensitive trichothiodystrophy                         | 0.101045461 | 0.162454305 | 1 Ercc2                                            |
| physical disorder                                          | 0.101045461 | 0.162454305 | 1 Bmp4                                             |
| platelet-type bleeding disorder 10                         | 0.101045461 | 0.162454305 | 1 Cd36                                             |
| Potocki-Lupski syndrome                                    | 0.101045461 | 0.162454305 | 1 Rai1                                             |
| premature ovarian failure                                  | 0.101045461 | 0.162454305 | 1 Fancf                                            |
| primary ciliary dyskinesia                                 | 0.091751965 | 0.162454305 | 3 Pcsk5,Slit2,Spef2                                |
| primary ciliary dyskinesia 2                               | 0.101045461 | 0.162454305 | 1 Dnaaf3                                           |
| prolactinoma                                               | 0.101045461 | 0.162454305 | 1 Men1                                             |
| prostate cancer                                            | 0.039105947 | 0.162454305 | 3 Apc,Ctnnb1,Pten                                  |
| pulmonary emphysema                                        | 0.05434372  | 0.162454305 | 3 Fbn1,Itgb6,Tlr4                                  |
| recessive dystrophic epidermolysis bullosa                 | 0.010205888 | 0.162454305 | 2 Col7a1,Grip1                                     |
| renal coloboma syndrome                                    | 0.101045461 | 0.162454305 | 1 Pax2                                             |
| retinitis pigmentosa 19                                    | 0.101045461 | 0.162454305 | 1 Abca4                                            |
| schizophrenia                                              | 0.054108359 | 0.162454305 | 8 Grin1,Magi2,Ncstn,Nr4a2,Ppm1g,Reln,Shank3,Slc6a3 |
| severe nonproliferative diabetic retinopathy               | 0.101045461 | 0.162454305 | 1 Pdgfrb                                           |
| short chain acyl-CoA dehydrogenase deficiency              | 0.101045461 | 0.162454305 | 1 Acads                                            |
| short-rib thoracic dysplasia 9 with or without polydactyly | 0.101045461 | 0.162454305 | 1 Ift140                                           |
| sick sinus syndrome                                        | 0.101045461 | 0.162454305 | 1 Hcn1                                             |
| Smith-Magenis syndrome                                     | 0.101045461 | 0.162454305 | 1 Rai1                                             |
| spinocerebellar ataxia type 2                              | 0.101045461 | 0.162454305 | 1 Atxn2                                            |
| spinocerebellar ataxia type 6                              | 0.101045461 | 0.162454305 | 1 Cacna1a                                          |
| spondylocarpotarsal synostosis syndrome                    | 0.101045461 | 0.162454305 | 1 Flnb                                             |
| spondyloepimetaphyseal dysplasia                           | 0.101045461 | 0.162454305 | 1 Col2a1                                           |
| Stickler syndrome                                          | 0.010205888 | 0.162454305 | 2 Col11a1,Col11a2                                  |
| tetralogy of Fallot                                        | 0.035283408 | 0.162454305 | 4 Cited2,Dock1,Phc1,Zfpm2                          |
| thiamine-responsive megaloblastic anemia syndrome          | 0.101045461 | 0.162454305 | 1 Slc19a2                                          |
| Tietz syndrome                                             | 0.101045461 | 0.162454305 | 1 Mitf                                             |
| Timothy syndrome                                           | 0.101045461 | 0.162454305 | 1 Cacna1c                                          |
| Townes-Brocks syndrome                                     | 0.101045461 | 0.162454305 | 1 Sall1                                            |
| Treacher Collins syndrome                                  | 0.101045461 | 0.162454305 | 1 Tcof1                                            |
| tricuspid atresia                                          | 0.101045461 | 0.162454305 | 1 Zfpm2                                            |
| tropical spastic paraparesis                               | 0.101045461 | 0.162454305 | 1 Zeb1                                             |
| Usher syndrome type 1                                      | 0.101045461 | 0.162454305 | 1 Myo7a                                            |
| visceral heterotaxy                                        | 0.057242421 | 0.162454305 | 6 Acvr2b,Cc2d2a,Cep290,Dnaaf3,Pcsk5,Slit2          |
| Waardenburg syndrome type 2A                               | 0.101045461 | 0.162454305 | 1 Mitf                                             |
| Waardenburg syndrome type 4C                               | 0.101045461 | 0.162454305 | 1 Sox10                                            |

|                                                                                                     |             |             |                               |
|-----------------------------------------------------------------------------------------------------|-------------|-------------|-------------------------------|
| Weill-Marchesani syndrome                                                                           | 0.010205888 | 0.162454305 | 2 Adamts10,Fbn1               |
| xeroderma pigmentosum group D                                                                       | 0.101045461 | 0.162454305 | 1 Ercc2                       |
| xeroderma pigmentosum group F                                                                       | 0.101045461 | 0.162454305 | 1 Ercc4                       |
| X-linked cleft palate with or without ankyloglossia                                                 | 0.101045461 | 0.162454305 | 1 Tbx22                       |
| atrioventricular septal defect                                                                      | 0.116305554 | 0.180988857 | 2 Bmp4,Nr1d2                  |
| attention deficit hyperactivity disorder                                                            | 0.113502794 | 0.180988857 | 3 Per1,Slc6a3,Tacr1           |
| Meckel syndrome                                                                                     | 0.116305554 | 0.180988857 | 2 Cc2d2a,Rpgrip1l             |
| microcephaly                                                                                        | 0.116305554 | 0.180988857 | 2 Aspm,Copb2                  |
| psoriasis                                                                                           | 0.116305554 | 0.180988857 | 2 Sptlc2,Ttc7                 |
| VACTERL association                                                                                 | 0.116305554 | 0.180988857 | 2 Dync2h1,Pcsk5               |
| age related macular degeneration 1                                                                  | 0.191885034 | 0.234615735 | 1 Vldlr                       |
| ARC syndrome                                                                                        | 0.191885034 | 0.234615735 | 1 Vps33b                      |
| arrhythmogenic right ventricular cardiomyopathy                                                     | 0.191885034 | 0.234615735 | 1 Ppp1r13l                    |
| asphyxiating thoracic dystrophy 3                                                                   | 0.191885034 | 0.234615735 | 1 Dync2h1                     |
| autoimmune lymphoproliferative syndrome                                                             | 0.191885034 | 0.234615735 | 1 Fasl                        |
| autosomal recessive nonsyndromic deafness 1A                                                        | 0.191885034 | 0.234615735 | 1 Gjb2                        |
| autosomal recessive osteopetrosis 1                                                                 | 0.191885034 | 0.234615735 | 1 Ccdc154                     |
| basal ganglia calcification                                                                         | 0.191885034 | 0.234615735 | 1 Pdgfrb                      |
| Beckwith-Wiedemann syndrome                                                                         | 0.191885034 | 0.234615735 | 1 Sptbn1                      |
| Bloom syndrome                                                                                      | 0.191885034 | 0.234615735 | 1 Blm                         |
| bone structure disease                                                                              | 0.191885034 | 0.234615735 | 1 Postn                       |
| cardiofaciocutaneous syndrome                                                                       | 0.191885034 | 0.234615735 | 1 Map2k1                      |
| cataract 2 multiple types                                                                           | 0.191885034 | 0.234615735 | 1 Crygd                       |
| colorectal cancer                                                                                   | 0.191885034 | 0.234615735 | 1 Apc                         |
| congenital fibrosis of the extraocular muscles                                                      | 0.191885034 | 0.234615735 | 1 Kif21a                      |
| coronary artery disease                                                                             | 0.191885034 | 0.234615735 | 1 Kcnj8                       |
| Crohn's disease                                                                                     | 0.191885034 | 0.234615735 | 1 Pikfyve                     |
| DiGeorge syndrome                                                                                   | 0.18805163  | 0.234615735 | 3 Dock1,Kat6a,Zfp366          |
| disease of mental health                                                                            | 0.191885034 | 0.234615735 | 1 Cic                         |
| fibrodysplasia ossificans progressiva                                                               | 0.191885034 | 0.234615735 | 1 Bmp4                        |
| glycogen storage disease V                                                                          | 0.191885034 | 0.234615735 | 1 Hif1a                       |
| glycogen storage disease VII                                                                        | 0.191885034 | 0.234615735 | 1 Hif1a                       |
| hereditary lymphedema                                                                               | 0.191885034 | 0.234615735 | 1 Vegfc                       |
| hypertrophic cardiomyopathy                                                                         | 0.189991318 | 0.234615735 | 2 Cav1,Htr2b                  |
| intestinal pseudo-obstruction                                                                       | 0.191885034 | 0.234615735 | 1 Pten                        |
| Jervell-Lange Nielsen syndrome                                                                      | 0.191885034 | 0.234615735 | 1 Kcnq1                       |
| Kallmann syndrome                                                                                   | 0.191885034 | 0.234615735 | 1 Sox10                       |
| lipodystrophy                                                                                       | 0.191885034 | 0.234615735 | 1 Ebf1                        |
| malaria                                                                                             | 0.152269975 | 0.234615735 | 2 Ank1,Fcgr2b                 |
| Marfan syndrome                                                                                     | 0.191885034 | 0.234615735 | 1 Fbn1                        |
| membranoproliferative glomerulonephritis                                                            | 0.191885034 | 0.234615735 | 1 Cfh                         |
| microvillus inclusion disease                                                                       | 0.191885034 | 0.234615735 | 1 Myo5b                       |
| nail-patella syndrome                                                                               | 0.191885034 | 0.234615735 | 1 Ldb1                        |
| Netherton syndrome                                                                                  | 0.191885034 | 0.234615735 | 1 Spink5                      |
| neurofibromatosis                                                                                   | 0.191885034 | 0.234615735 | 1 Nf1                         |
| Noonan syndrome                                                                                     | 0.191885034 | 0.234615735 | 1 Apa1                        |
| PCWH syndrome                                                                                       | 0.191885034 | 0.234615735 | 1 Sox10                       |
| Pendred Syndrome                                                                                    | 0.191885034 | 0.234615735 | 1 Slc26a4                     |
| persistent fetal circulation syndrome                                                               | 0.191885034 | 0.234615735 | 1 Pten                        |
| Pierson syndrome                                                                                    | 0.191885034 | 0.234615735 | 1 Lamb2                       |
| pigment dispersion syndrome                                                                         | 0.191885034 | 0.234615735 | 1 Col18a1                     |
| right atrial isomerism                                                                              | 0.191885034 | 0.234615735 | 1 Acvr2b                      |
| severe combined immunodeficiency, autosomal recessive, T cell-negative, B cell-positive, Nk cell-po | 0.191885034 | 0.234615735 | 1 Jak3                        |
| spondyloepiphyseal dysplasia congenita                                                              | 0.191885034 | 0.234615735 | 1 Col2a1                      |
| Stargardt disease                                                                                   | 0.191885034 | 0.234615735 | 1 Abca4                       |
| stomach cancer                                                                                      | 0.191885034 | 0.234615735 | 1 Il6st                       |
| syndromic intellectual disability                                                                   | 0.191885034 | 0.234615735 | 1 Brpf1                       |
| thyroid hormone resistance syndrome                                                                 | 0.191885034 | 0.234615735 | 1 Ncoa1                       |
| urinary system disease                                                                              | 0.191885034 | 0.234615735 | 1 Bmp4                        |
| Waardenburg syndrome type 1                                                                         | 0.191885034 | 0.234615735 | 1 Mitf                        |
| Wolf-Hirschhorn syndrome                                                                            | 0.191885034 | 0.234615735 | 1 Nsd2                        |
| systemic lupus erythematosus                                                                        | 0.235556576 | 0.286807379 | 5 Ep300,Fcgr2b,Lbr,Mta2,Rc3h1 |
| arteriovenous malformations of the brain                                                            | 0.27354911  | 0.309738486 | 1 Notch4                      |
| Ehlers-Danlos syndrome                                                                              | 0.27354911  | 0.309738486 | 1 Col1a1                      |
| epidermolytic hyperkeratosis                                                                        | 0.27354911  | 0.309738486 | 1 Jup                         |
| follicular thyroid carcinoma                                                                        | 0.27354911  | 0.309738486 | 1 Pten                        |
| Gitelman syndrome                                                                                   | 0.27354911  | 0.309738486 | 1 Slc12a3                     |
| hereditary sensory neuropathy                                                                       | 0.27354911  | 0.309738486 | 1 Dst                         |
| hyperparathyroidism                                                                                 | 0.27354911  | 0.309738486 | 1 Men1                        |
| hypohidrotic ectodermal dysplasia                                                                   | 0.27354911  | 0.309738486 | 1 Edar                        |
| idiopathic generalized epilepsy                                                                     | 0.27354911  | 0.309738486 | 1 Cacna2d2                    |
| junctional epidermolysis bullosa Herlitz type                                                       | 0.27354911  | 0.309738486 | 1 Lamc2                       |
| low tension glaucoma                                                                                | 0.27354911  | 0.309738486 | 1 Slc1a3                      |
| maple syrup urine disease                                                                           | 0.27354911  | 0.309738486 | 1 Ppm1k                       |
| medulloblastoma                                                                                     | 0.27354911  | 0.309738486 | 1 Ptch1                       |
| nephronophthisis                                                                                    | 0.27354911  | 0.309738486 | 1 Cntrl                       |
| osteoarthritis                                                                                      | 0.267945355 | 0.309738486 | 2 Col11a1,Col9a1              |
| osteopetrosis                                                                                       | 0.27354911  | 0.309738486 | 1 Mitf                        |
| spondylocostal dysostosis                                                                           | 0.27354911  | 0.309738486 | 1 Tbx6                        |
| type I Ehlers-Danlos syndrome                                                                       | 0.27354911  | 0.309738486 | 1 Col5a2                      |
| congenital diaphragmatic hernia                                                                     | 0.307099441 | 0.346379602 | 2 Pdgfra,Zfpm2                |
| asthma                                                                                              | 0.346964094 | 0.379573501 | 1 Itgb6                       |
| chronic myeloid leukemia                                                                            | 0.346964094 | 0.379573501 | 1 Ncstn                       |
| exudative vitreoretinopathy                                                                         | 0.346964094 | 0.379573501 | 1 Lrp5                        |
| Gilles de la Tourette syndrome                                                                      | 0.346964094 | 0.379573501 | 1 Slc6a3                      |
| juvenile myelomonocytic leukemia                                                                    | 0.346964094 | 0.379573501 | 1 Nf1                         |
| myelofibrosis                                                                                       | 0.346964094 | 0.379573501 | 1 Ncor2                       |
| nonalcoholic fatty liver disease                                                                    | 0.346964094 | 0.379573501 | 1 Sidt2                       |
| Parkinson's disease                                                                                 | 0.34581877  | 0.379573501 | 2 Adh7,Nr4a2                  |

|                                       |             |             |                          |
|---------------------------------------|-------------|-------------|--------------------------|
| Kartagener syndrome                   | 0.383791527 | 0.418289642 | 2 Dnaaf3,Slit2           |
| muscular dystrophy-dystroglycanopathy | 0.412962896 | 0.446736814 | 1 B4gat1                 |
| systemic scleroderma                  | 0.412962896 | 0.446736814 | 1 Fbn1                   |
| type 1 diabetes mellitus              | 0.44769152  | 0.482511972 | 3 FasI,Nos2,Stat4        |
| clubfoot                              | 0.472294365 | 0.5015973   | 1 Grip1                  |
| nephrotic syndrome                    | 0.472294365 | 0.5015973   | 1 Itsn2                  |
| primary pulmonary hypertension        | 0.472294365 | 0.5015973   | 1 Bmpr2                  |
| rheumatoid arthritis                  | 0.472294365 | 0.5015973   | 1 Il6st                  |
| acute myeloid leukemia                | 0.525631763 | 0.552197989 | 1 Kmt2a                  |
| cataract                              | 0.525631763 | 0.552197989 | 1 Dnase2b                |
| male infertility                      | 0.525631763 | 0.552197989 | 1 Pmfbp1                 |
| type 2 diabetes mellitus              | 0.529849514 | 0.554626649 | 4 Cyb5r4,Foxm1,Irs1,Madd |
| obesity                               | 0.538741316 | 0.561912986 | 4 Alms1,Mkks,Ncoa1,Tyk2  |
| Alzheimer's disease                   | 0.573580398 | 0.593992512 | 1 Cav1                   |
| congenital hypothyroidism             | 0.573580398 | 0.593992512 | 1 Tg                     |
| hydrocephalus                         | 0.702582936 | 0.725005796 | 2 Nme5,Ulk4              |
| dilated cardiomyopathy                | 1           | 1           | 3 Cenpf,ErbB2,Phc1       |
| fatty liver disease                   | 1           | 1           | 1 Pten                   |
| Hirschsprung's disease                | 1           | 1           | 1 Erbb2                  |
| myelodysplastic syndrome              | 1           | 1           | 1 Egr1                   |
| otitis media                          | 1           | 1           | 2 Sall4,Trp73            |
| platelet storage pool deficiency      | 1           | 1           | 1 Hps5                   |
| retinitis pigmentosa                  | 1           | 1           | 1 Crb2                   |
| sinoatrial node disease               | 1           | 1           | 1 Ank2                   |
| Williams-Beuren syndrome              | 1           | 1           | 1 Baz1b                  |

| DO                                                          | p_val_FET   | p_val_adj   | n_genes | genes_mutated                                          |
|-------------------------------------------------------------|-------------|-------------|---------|--------------------------------------------------------|
| achondrogenesis type IA                                     | 0.138275226 | 0.217906941 | 1       | Trip11                                                 |
| achondrogenesis type II                                     | 0.138275226 | 0.217906941 | 1       | Col2a1                                                 |
| achondroplasia                                              | 0.021243361 | 0.217906941 | 3       | Fgfr3,Npr2,Spred2                                      |
| acromesomelic dysplasia, Maroteaux type                     | 0.138275226 | 0.217906941 | 1       | Npr2                                                   |
| acute myeloid leukemia                                      | 0.060012371 | 0.217906941 | 3       | Arid4a,Crebbp,Kmt2a                                    |
| adult-onset autosomal dominant demyelinating leukodystrophy | 0.138275226 | 0.217906941 | 1       | Lmnb1                                                  |
| age related macular degeneration 14                         | 0.138275226 | 0.217906941 | 1       | C2                                                     |
| age related macular degeneration 9                          | 0.138275226 | 0.217906941 | 1       | C3                                                     |
| Alexander disease                                           | 0.138275226 | 0.217906941 | 1       | Gfap                                                   |
| alkaptonuria                                                | 0.138275226 | 0.217906941 | 1       | Hgd                                                    |
| alopecia universalis                                        | 0.138275226 | 0.217906941 | 1       | Hr                                                     |
| alpha-mannosidosis                                          | 0.138275226 | 0.217906941 | 1       | Man2b1                                                 |
| amyotrophic lateral sclerosis type 6                        | 0.138275226 | 0.217906941 | 1       | Fus                                                    |
| angle-closure glaucoma                                      | 0.138275226 | 0.217906941 | 1       | Tfap2b                                                 |
| arteriovenous malformations of the brain                    | 0.052060224 | 0.217906941 | 2       | Eng,Notch4                                             |
| aspartylglucosaminuria                                      | 0.138275226 | 0.217906941 | 1       | Aga                                                    |
| asphyxiating thoracic dystrophy                             | 0.138275226 | 0.217906941 | 1       | Smarcad1                                               |
| asphyxiating thoracic dystrophy 2                           | 0.138275226 | 0.217906941 | 1       | lft80                                                  |
| autoimmune polyendocrine syndrome type 1                    | 0.138275226 | 0.217906941 | 1       | Aire                                                   |
| autosomal dominant disease                                  | 0.138275226 | 0.217906941 | 1       | Fgfr3                                                  |
| autosomal dominant familial periodic fever                  | 0.138275226 | 0.217906941 | 1       | Tnfrsf1a                                               |
| autosomal dominant nonsyndromic deafness 36                 | 0.138275226 | 0.217906941 | 1       | Tmc1                                                   |
| autosomal dominant Parkinson's disease 1                    | 0.138275226 | 0.217906941 | 1       | Snca                                                   |
| autosomal dominant Parkinson's disease 4                    | 0.138275226 | 0.217906941 | 1       | Snca                                                   |
| autosomal dominant Parkinson's disease 8                    | 0.138275226 | 0.217906941 | 1       | Lrrk2                                                  |
| autosomal dominant pseudohypoadosteronism type 1            | 0.138275226 | 0.217906941 | 1       | Nr3c2                                                  |
| autosomal recessive Alport syndrome                         | 0.00264149  | 0.217906941 | 3       | Col4a3,Col4a4,Mpv17                                    |
| autosomal recessive limb-girdle muscular dystrophy type 2E  | 0.138275226 | 0.217906941 | 1       | Sgcb                                                   |
| autosomal recessive limb-girdle muscular dystrophy type 2P  | 0.138275226 | 0.217906941 | 1       | Dag1                                                   |
| autosomal recessive nonsyndromic deafness 18A               | 0.138275226 | 0.217906941 | 1       | Ush1c                                                  |
| autosomal recessive nonsyndromic deafness 18B               | 0.138275226 | 0.217906941 | 1       | Otog                                                   |
| autosomal recessive nonsyndromic deafness 2                 | 0.138275226 | 0.217906941 | 1       | Myo7a                                                  |
| autosomal recessive nonsyndromic deafness 22                | 0.138275226 | 0.217906941 | 1       | Otoa                                                   |
| autosomal recessive nonsyndromic deafness 42                | 0.138275226 | 0.217906941 | 1       | lldr1                                                  |
| autosomal recessive nonsyndromic deafness 68                | 0.138275226 | 0.217906941 | 1       | S1pr2                                                  |
| autosomal recessive nonsyndromic deafness 7                 | 0.138275226 | 0.217906941 | 1       | Tmc1                                                   |
| autosomal recessive nonsyndromic deafness 9                 | 0.138275226 | 0.217906941 | 1       | Otof                                                   |
| autosomal recessive osteopetrosis 3                         | 0.138275226 | 0.217906941 | 1       | Car2                                                   |
| autosomal recessive spinocerebellar ataxia 18               | 0.138275226 | 0.217906941 | 1       | Grid2                                                  |
| Bardet-Biedl syndrome                                       | 0.138275226 | 0.217906941 | 1       | Tbc1d32                                                |
| Bardet-Biedl syndrome 8                                     | 0.138275226 | 0.217906941 | 1       | Ttc8                                                   |
| Bartter disease                                             | 0.138275226 | 0.217906941 | 1       | Clcnkb                                                 |
| Bartter disease type 3                                      | 0.138275226 | 0.217906941 | 1       | Clcnkb                                                 |
| Becker muscular dystrophy                                   | 0.138275226 | 0.217906941 | 1       | Dmd                                                    |
| beta-mannosidosis                                           | 0.138275226 | 0.217906941 | 1       | Manba                                                  |
| Bietti crystalline corneoretinal dystrophy                  | 0.138275226 | 0.217906941 | 1       | Cyp4v3                                                 |
| blepharophimosis, ptosis, and epicanthus inversus syndrome  | 0.138275226 | 0.217906941 | 1       | Foxl2                                                  |
| Bloch-Sulzberger syndrome                                   | 0.138275226 | 0.217906941 | 1       | lkbkg                                                  |
| bone development disease                                    | 0.138275226 | 0.217906941 | 1       | Npr2                                                   |
| bone disease                                                | 0.138275226 | 0.217906941 | 1       | Npr3                                                   |
| Brugada syndrome 1                                          | 0.138275226 | 0.217906941 | 1       | Scn5a                                                  |
| Brunner Syndrome                                            | 0.138275226 | 0.217906941 | 1       | Maoa                                                   |
| Budd-Chiari syndrome                                        | 0.138275226 | 0.217906941 | 1       | F5                                                     |
| CAKUT                                                       | 0.138275226 | 0.217906941 | 1       | Lifr                                                   |
| carbamoyl phosphate synthetase I deficiency disease         | 0.138275226 | 0.217906941 | 1       | Cps1                                                   |
| Carpenter syndrome                                          | 0.138275226 | 0.217906941 | 1       | Megf8                                                  |
| cataract 1 multiple types                                   | 0.138275226 | 0.217906941 | 1       | Gja8                                                   |
| cataract 39 multiple types                                  | 0.138275226 | 0.217906941 | 1       | Crygb                                                  |
| cerebral cavernous malformation                             | 0.138275226 | 0.217906941 | 1       | Krit1                                                  |
| Charcot-Marie-Tooth disease axonal type 2K                  | 0.138275226 | 0.217906941 | 1       | Gdap1                                                  |
| Charcot-Marie-Tooth disease axonal type 2O                  | 0.138275226 | 0.217906941 | 1       | Dync1h1                                                |
| Charcot-Marie-Tooth disease type 2A1                        | 0.138275226 | 0.217906941 | 1       | Kif1b                                                  |
| Charcot-Marie-Tooth disease type 2A2                        | 0.138275226 | 0.217906941 | 1       | Mfn2                                                   |
| Charcot-Marie-Tooth disease type 4B2                        | 0.138275226 | 0.217906941 | 1       | Sbf2                                                   |
| Charcot-Marie-Tooth disease type 4D                         | 0.138275226 | 0.217906941 | 1       | Ndrp1                                                  |
| Charcot-Marie-Tooth disease X-linked dominant 1             | 0.138275226 | 0.217906941 | 1       | Gjb1                                                   |
| Char syndrome                                               | 0.138275226 | 0.217906941 | 1       | Tfap2b                                                 |
| Chediak-Higashi syndrome                                    | 0.138275226 | 0.217906941 | 1       | Lyst                                                   |
| chondrodysplasia-pseudohermaphroditism syndrome             | 0.138275226 | 0.217906941 | 1       | Hhat                                                   |
| choreacanthocytosis                                         | 0.138275226 | 0.217906941 | 1       | Vps13a                                                 |
| cleft palate                                                | 0.138275226 | 0.217906941 | 1       | Golgb1                                                 |
| complement component 2 deficiency                           | 0.138275226 | 0.217906941 | 1       | C2                                                     |
| complement component 3 deficiency                           | 0.138275226 | 0.217906941 | 1       | C3                                                     |
| Compton-North congenital myopathy                           | 0.138275226 | 0.217906941 | 1       | Cntn1                                                  |
| cone-rod dystrophy 9                                        | 0.138275226 | 0.217906941 | 1       | Adam9                                                  |
| congenital bile acid synthesis defect 5                     | 0.138275226 | 0.217906941 | 1       | Abcd3                                                  |
| congenital hypothyroidism                                   | 0.086386999 | 0.217906941 | 3       | Duox2,Tpo,Trhr                                         |
| congenital merosin-deficient muscular dystrophy 1A          | 0.138275226 | 0.217906941 | 1       | Lama2                                                  |
| congenital secretory chloride diarrhea 1                    | 0.138275226 | 0.217906941 | 1       | Slc26a3                                                |
| congenital stationary night blindness 2A                    | 0.138275226 | 0.217906941 | 1       | Cacln1f                                                |
| congenital stationary night blindness autosomal dominant 2  | 0.138275226 | 0.217906941 | 1       | Pde6b                                                  |
| Cornelia de Lange syndrome                                  | 0.019114401 | 0.217906941 | 2       | Nipbl,Pds5a                                            |
| craniofrontonasal syndrome                                  | 0.138275226 | 0.217906941 | 1       | Efnb1                                                  |
| cutaneous porphyria                                         | 0.138275226 | 0.217906941 | 1       | Uros                                                   |
| cystic kidney disease                                       | 0.116693711 | 0.217906941 | 3       | Dnm2,Robo1,Slit2                                       |
| Dandy-Walker syndrome                                       | 0.052060224 | 0.217906941 | 2       | Zic1,Zic4                                              |
| Dent disease                                                | 0.138275226 | 0.217906941 | 1       | Clcn5                                                  |
| dilated cardiomyopathy                                      | 0.029359148 | 0.217906941 | 10      | Cenpf,Dag1,Dicer1,Dnm1,Ilk,Med1,Myh6,Nr2f2,Pdcd1,Prox1 |

|                                                                       |             |             |                                    |
|-----------------------------------------------------------------------|-------------|-------------|------------------------------------|
| dilated cardiomyopathy 1E                                             | 0.138275226 | 0.217906941 | 1 Scn5a                            |
| dilated cardiomyopathy 1EE                                            | 0.138275226 | 0.217906941 | 1 Myh6                             |
| Down syndrome                                                         | 0.138275226 | 0.217906941 | 1 Dyrk1a                           |
| episodic ataxia type 1                                                | 0.138275226 | 0.217906941 | 1 Kcna1                            |
| exfoliation syndrome                                                  | 0.138275226 | 0.217906941 | 1 Lyst                             |
| factor V deficiency                                                   | 0.138275226 | 0.217906941 | 1 F5                               |
| familial cold autoinflammatory syndrome 4                             | 0.138275226 | 0.217906941 | 1 Nlrp4                            |
| familial hemophagocytic lymphohistiocytosis 3                         | 0.138275226 | 0.217906941 | 1 Unc13d                           |
| familial isolated deficiency of vitamin E                             | 0.138275226 | 0.217906941 | 1 Ttpa                             |
| familial Mediterranean fever                                          | 0.138275226 | 0.217906941 | 1 Mefv                             |
| familial temporal lobe epilepsy 1                                     | 0.138275226 | 0.217906941 | 1 Lgi1                             |
| Fanconi anemia                                                        | 0.138275226 | 0.217906941 | 1 Usp1                             |
| Fanconi anemia complementation group A                                | 0.138275226 | 0.217906941 | 1 Fanca                            |
| Fanconi anemia complementation group C                                | 0.138275226 | 0.217906941 | 1 Fance                            |
| Fanconi anemia complementation group D1                               | 0.138275226 | 0.217906941 | 1 Brca2                            |
| focal segmental glomerulosclerosis 2                                  | 0.138275226 | 0.217906941 | 1 Trpc6                            |
| fucosidosis                                                           | 0.138275226 | 0.217906941 | 1 Fuca1                            |
| gastroschisis                                                         | 0.138275226 | 0.217906941 | 1 Lrp1                             |
| glycerol kinase deficiency                                            | 0.138275226 | 0.217906941 | 1 Gk                               |
| glycogen storage disease V                                            | 0.019114401 | 0.217906941 | 2 Hif1a,Pygm                       |
| GM2 gangliosidosis, AB variant                                        | 0.138275226 | 0.217906941 | 1 Gm2a                             |
| granulosa cell tumor                                                  | 0.138275226 | 0.217906941 | 1 Cttnb1                           |
| Greig cephalopolysyndactyly syndrome                                  | 0.138275226 | 0.217906941 | 1 Gli3                             |
| guanidinoacetate methyltransferase deficiency                         | 0.138275226 | 0.217906941 | 1 Gamt                             |
| Hajdu-Cheney syndrome                                                 | 0.138275226 | 0.217906941 | 1 Notch2                           |
| hereditary mucosal leukokeratosis                                     | 0.138275226 | 0.217906941 | 1 Krt4                             |
| hereditary sensory and autonomic neuropathy type 6                    | 0.138275226 | 0.217906941 | 1 Dst                              |
| hereditary spastic paraplegia 15                                      | 0.138275226 | 0.217906941 | 1 Zfyve26                          |
| hereditary spastic paraplegia 2                                       | 0.138275226 | 0.217906941 | 1 Plp1                             |
| hereditary spastic paraplegia 4                                       | 0.138275226 | 0.217906941 | 1 Spast                            |
| hereditary spherocytosis type 4                                       | 0.138275226 | 0.217906941 | 1 Slc4a1                           |
| hypertrophic cardiomyopathy 14                                        | 0.138275226 | 0.217906941 | 1 Myh6                             |
| hypertrophic cardiomyopathy 4                                         | 0.138275226 | 0.217906941 | 1 Mybpc3                           |
| hypertrophic pyloric stenosis                                         | 0.138275226 | 0.217906941 | 1 Nos1                             |
| hypoparathyroidism                                                    | 0.138275226 | 0.217906941 | 1 Gcm2                             |
| hypotonia-cystinuria syndrome                                         | 0.138275226 | 0.217906941 | 1 Camkmt                           |
| hypotrichosis 4                                                       | 0.138275226 | 0.217906941 | 1 Hr                               |
| immune dysregulation-polyendocrinopathy-enteropathy-X-linked syndrome | 0.138275226 | 0.217906941 | 1 Foxp3                            |
| inflammatory bowel disease 1                                          | 0.138275226 | 0.217906941 | 1 Nod2                             |
| inflammatory bowel disease 12                                         | 0.138275226 | 0.217906941 | 1 Gnai2                            |
| isolated anhidrosis with normal sweat glands                          | 0.138275226 | 0.217906941 | 1 Itpr2                            |
| isolated cleft palate                                                 | 0.138275226 | 0.217906941 | 1 Satb2                            |
| Joubert syndrome                                                      | 0.138275226 | 0.217906941 | 1 Zic1                             |
| Joubert syndrome 26                                                   | 0.138275226 | 0.217906941 | 1 D430042009Rik                    |
| junctional epidermolysis bullosa                                      | 0.138275226 | 0.217906941 | 1 Lama3                            |
| junctional epidermolysis bullosa with pyloric atresia                 | 0.138275226 | 0.217906941 | 1 Itgb4                            |
| Kabuki syndrome                                                       | 0.138275226 | 0.217906941 | 1 Kmt2d                            |
| Kartagener syndrome                                                   | 0.024742222 | 0.217906941 | 5 Ap1b1,Armc4,Ccdc151,Dnaaf3,Slit2 |
| karyomegalic interstitial nephritis                                   | 0.138275226 | 0.217906941 | 1 Fan1                             |
| keratosis follicularis                                                | 0.138275226 | 0.217906941 | 1 Atp2a2                           |
| Leber congenital amaurosis 5                                          | 0.138275226 | 0.217906941 | 1 Lca5                             |
| Leber congenital amaurosis 6                                          | 0.138275226 | 0.217906941 | 1 Rpgrip1                          |
| Leber congenital amaurosis 8                                          | 0.138275226 | 0.217906941 | 1 Crb1                             |
| Lennox-Gastaut syndrome                                               | 0.138275226 | 0.217906941 | 1 Dgkd                             |
| Lesch-Nyhan syndrome                                                  | 0.138275226 | 0.217906941 | 1 Hpirt                            |
| long QT syndrome 3                                                    | 0.138275226 | 0.217906941 | 1 Scn5a                            |
| lung cancer                                                           | 0.021243361 | 0.217906941 | 3 Foxm1,Robo1,Xpc                  |
| lymphocytic leukemia                                                  | 0.138275226 | 0.217906941 | 1 Tal1                             |
| lysosomal storage disease                                             | 0.138275226 | 0.217906941 | 1 Slc17a5                          |
| meconium aspiration syndrome                                          | 0.138275226 | 0.217906941 | 1 Atf2                             |
| megacystis-microcolon-intestinal hypoperistalsis syndrome             | 0.138275226 | 0.217906941 | 1 Chrm3                            |
| microcephaly                                                          | 0.038152818 | 0.217906941 | 3 Aspm,Kif20b,Mcp1                 |
| mitochondrial DNA depletion syndrome 3                                | 0.138275226 | 0.217906941 | 1 Mpv17                            |
| mitral valve prolapse                                                 | 0.138275226 | 0.217906941 | 1 Dchs1                            |
| motor neuron disease                                                  | 0.138275226 | 0.217906941 | 1 Rhot1                            |
| Mowat-Wilson syndrome                                                 | 0.138275226 | 0.217906941 | 1 Zeb2                             |
| Muenke Syndrome                                                       | 0.138275226 | 0.217906941 | 1 Fgfr3                            |
| multiple endocrine neoplasia type 2B                                  | 0.138275226 | 0.217906941 | 1 Ret                              |
| MYH-9 related disease                                                 | 0.138275226 | 0.217906941 | 1 Myh9                             |
| myositis                                                              | 0.138275226 | 0.217906941 | 1 H2-K1                            |
| myotonia congenita                                                    | 0.138275226 | 0.217906941 | 1 Clcn1                            |
| myotonic dystrophy type 1                                             | 0.138275226 | 0.217906941 | 1 Dmpk                             |
| nemaline myopathy                                                     | 0.138275226 | 0.217906941 | 1 Khlh41                           |
| neonatal diabetes mellitus with congenital hypothyroidism             | 0.138275226 | 0.217906941 | 1 Glis3                            |
| nephrosis                                                             | 0.138275226 | 0.217906941 | 1 Lamb2                            |
| neurodegeneration with brain iron accumulation 2a                     | 0.138275226 | 0.217906941 | 1 Pla2g6                           |
| neuronal ceroid lipofuscinosis 2                                      | 0.138275226 | 0.217906941 | 1 Tpp1                             |
| non-Hodgkin lymphoma                                                  | 0.019114401 | 0.217906941 | 2 Mtss1,S1pr2                      |
| omphalocele                                                           | 0.138275226 | 0.217906941 | 1 Lrp1                             |
| osteochondrodysplasia                                                 | 0.138275226 | 0.217906941 | 1 Atf2                             |
| osteogenesis imperfecta type 10                                       | 0.138275226 | 0.217906941 | 1 Serpinh1                         |
| osteogenesis imperfecta type 5                                        | 0.138275226 | 0.217906941 | 1 Suco                             |
| osteopathia striata with cranial sclerosis                            | 0.138275226 | 0.217906941 | 1 Amer1                            |
| ovarian disease                                                       | 0.138275226 | 0.217906941 | 1 Patl2                            |
| Pallister-Hall syndrome                                               | 0.138275226 | 0.217906941 | 1 Gli3                             |
| patterned macular dystrophy 2                                         | 0.138275226 | 0.217906941 | 1 Cttna1                           |
| Pelizaeus-Merzbacher disease                                          | 0.138275226 | 0.217906941 | 1 Plp1                             |
| peripheral T-cell lymphoma                                            | 0.138275226 | 0.217906941 | 1 Rc3h1                            |
| pheochromocytoma                                                      | 0.138275226 | 0.217906941 | 1 Ret                              |

|                                                     |             |             |                                                          |
|-----------------------------------------------------|-------------|-------------|----------------------------------------------------------|
| Pierson syndrome                                    | 0.019114401 | 0.217906941 | 2 Lamb2,Tns2                                             |
| platelet storage pool deficiency                    | 0.116806029 | 0.217906941 | 4 Ap3d1,Dock7,Lyst,Slc7a11                               |
| polycystic liver disease                            | 0.138275226 | 0.217906941 | 1 Prkcsb                                                 |
| Potocki-Lupski syndrome                             | 0.138275226 | 0.217906941 | 1 Rai1                                                   |
| primary ciliary dyskinesia 2                        | 0.138275226 | 0.217906941 | 1 Dnaaf3                                                 |
| primary ciliary dyskinesia 23                       | 0.138275226 | 0.217906941 | 1 Armc4                                                  |
| primary ciliary dyskinesia 30                       | 0.138275226 | 0.217906941 | 1 Ccdc151                                                |
| primary open angle glaucoma                         | 0.138275226 | 0.217906941 | 1 Gucy1a1                                                |
| progressive familial heart block type IA            | 0.138275226 | 0.217906941 | 1 Scn5a                                                  |
| pseudohypoadosteronism                              | 0.138275226 | 0.217906941 | 1 Klhl3                                                  |
| pseudoxanthoma elasticum                            | 0.138275226 | 0.217906941 | 1 Abcc6                                                  |
| retinitis pigmentosa 1                              | 0.138275226 | 0.217906941 | 1 Rp1                                                    |
| retinitis pigmentosa 12                             | 0.138275226 | 0.217906941 | 1 Crb1                                                   |
| retinitis pigmentosa 40                             | 0.138275226 | 0.217906941 | 1 Pde6b                                                  |
| rhizomelic chondrodysplasia punctata type 2         | 0.138275226 | 0.217906941 | 1 Gnpat                                                  |
| Rothmund-Thomson syndrome                           | 0.138275226 | 0.217906941 | 1 Recql4                                                 |
| Rubinstein-Taybi syndrome                           | 0.138275226 | 0.217906941 | 1 Crebbp                                                 |
| salivary gland cancer                               | 0.138275226 | 0.217906941 | 1 Gon4l                                                  |
| Schimke immuno-osseous dysplasia                    | 0.138275226 | 0.217906941 | 1 Smarcal1                                               |
| scoliosis                                           | 0.138275226 | 0.217906941 | 1 Fgfr3                                                  |
| severe congenital neutropenia                       | 0.138275226 | 0.217906941 | 1 Gfi1                                                   |
| Shwachman-Diamond syndrome                          | 0.019114401 | 0.217906941 | 2 Sbds,Serpini2                                          |
| sialuria                                            | 0.138275226 | 0.217906941 | 1 Slc17a5                                                |
| skin disease                                        | 0.138275226 | 0.217906941 | 1 Fyn                                                    |
| skin squamous cell carcinoma                        | 0.138275226 | 0.217906941 | 1 Fyn                                                    |
| Smith-Magenis syndrome                              | 0.138275226 | 0.217906941 | 1 Rai1                                                   |
| spinocerebellar ataxia type 27                      | 0.138275226 | 0.217906941 | 1 Fgf14                                                  |
| spondyloepimetaphyseal dysplasia                    | 0.138275226 | 0.217906941 | 1 Col2a1                                                 |
| systemic lupus erythematosus                        | 0.030933221 | 0.217906941 | 9 C4b,Ep300,Fas,Ih1h1,Jak1,Pdcd1,Ptprc,Rc3h1,Traf3ip2    |
| Tangier disease                                     | 0.138275226 | 0.217906941 | 1 Abca1                                                  |
| T-cell adult acute lymphocytic leukemia             | 0.019114401 | 0.217906941 | 2 Cntn2,Zeb2                                             |
| temporal lobe epilepsy                              | 0.138275226 | 0.217906941 | 1 Kcna1                                                  |
| tricuspid atresia                                   | 0.138275226 | 0.217906941 | 1 Zfpn2                                                  |
| type I Ehlers-Danlos syndrome                       | 0.052060224 | 0.217906941 | 2 Col5a1,Col5a2                                          |
| urofacial syndrome                                  | 0.138275226 | 0.217906941 | 1 Hpse2                                                  |
| Usher syndrome type 1                               | 0.138275226 | 0.217906941 | 1 Myo7a                                                  |
| Usher syndrome type 1C                              | 0.138275226 | 0.217906941 | 1 Ush1c                                                  |
| Usher syndrome type 2C                              | 0.019114401 | 0.217906941 | 2 Adgrv1,Slc4a7                                          |
| uterine fibroid                                     | 0.138275226 | 0.217906941 | 1 Tsc2                                                   |
| VACTERL association                                 | 0.038152818 | 0.217906941 | 3 Ifit172,Qsox1,Tbc1d32                                  |
| vesicoureteral reflux                               | 0.138275226 | 0.217906941 | 1 Upk3a                                                  |
| Weaver syndrome                                     | 0.138275226 | 0.217906941 | 1 Ezh2                                                   |
| Wolcott-Rallison syndrome                           | 0.138275226 | 0.217906941 | 1 Eif2ak3                                                |
| xeroderma pigmentosum                               | 0.138275226 | 0.217906941 | 1 Terf2                                                  |
| xeroderma pigmentosum group C                       | 0.138275226 | 0.217906941 | 1 Xpc                                                    |
| X-linked Alport syndrome                            | 0.138275226 | 0.217906941 | 1 Col4a5                                                 |
| X-linked cleft palate with or without ankyloglossia | 0.138275226 | 0.217906941 | 1 Tbx22                                                  |
| acute lymphocytic leukemia                          | 0.143586556 | 0.223286583 | 2 Ezh2,Kmt2a                                             |
| DiGeorge syndrome                                   | 0.142693378 | 0.223286583 | 4 ChrD,Dicer1,Kat6a,Zfp366                               |
| junctional epidermolysis bullosa non-Herlitz type   | 0.143586556 | 0.223286583 | 2 Itgb4,Lama3                                            |
| epilepsy                                            | 0.15027472  | 0.231646184 | 3 Aldh5a1,Kcna1,Scn8a                                    |
| Williams-Beuren syndrome                            | 0.15027472  | 0.231646184 | 3 Baz1b,Gtf2i,Limk1                                      |
| autistic disorder                                   | 0.174743244 | 0.268192891 | 9 Brinp1,Cadps2,Crebbp,Ctnnb1,Gstm1,Nrp2,Nrxn1,Tbr1,Tsc2 |
| congenital diaphragmatic hernia                     | 0.186449917 | 0.283693193 | 3 Lrp1,Nr2f2,Zfpn2                                       |
| primary ciliary dyskinesia                          | 0.186449917 | 0.283693193 | 3 Ap1b1,Slit2,Spef2                                      |
| nephrotic syndrome                                  | 0.196303426 | 0.296132945 | 2 Itsn2,Mpv17                                            |
| rheumatoid arthritis                                | 0.196303426 | 0.296132945 | 2 Mmp14,Zfp36                                            |
| abdominal obesity-metabolic syndrome                | 0.250819847 | 0.315537937 | 2 Prkci,Sirt3                                            |
| age related macular degeneration 1                  | 0.257436051 | 0.315537937 | 1 Vldlr                                                  |
| agnathia-otocephaly complex                         | 0.257436051 | 0.315537937 | 1 Trappc10                                               |
| ARC syndrome                                        | 0.257436051 | 0.315537937 | 1 Vps33b                                                 |
| asphyxiating thoracic dystrophy 3                   | 0.257436051 | 0.315537937 | 1 Ifit80                                                 |
| atrachia with papular lesions                       | 0.257436051 | 0.315537937 | 1 Hr                                                     |
| autoimmune lymphoproliferative syndrome             | 0.257436051 | 0.315537937 | 1 Fas                                                    |
| autosomal recessive osteopetrosis 1                 | 0.257436051 | 0.315537937 | 1 Ccdc154                                                |
| autosomal recessive Robinow syndrome                | 0.257436051 | 0.315537937 | 1 Ror2                                                   |
| Beckwith-Wiedemann syndrome                         | 0.257436051 | 0.315537937 | 1 Sptbn1                                                 |
| cardiofaciocutaneous syndrome                       | 0.257436051 | 0.315537937 | 1 Map2k1                                                 |
| chromosome 1p36 deletion syndrome                   | 0.257436051 | 0.315537937 | 1 Kcnab2                                                 |
| Cockayne syndrome                                   | 0.257436051 | 0.315537937 | 1 Ercc6                                                  |
| common variable immunodeficiency                    | 0.257436051 | 0.315537937 | 1 Icos                                                   |
| congenital fibrosis of the extraocular muscles      | 0.257436051 | 0.315537937 | 1 Kif21a                                                 |
| congenital generalized lipodystrophy type 2         | 0.257436051 | 0.315537937 | 1 Bsc12                                                  |
| coronary artery disease                             | 0.257436051 | 0.315537937 | 1 Abcc9                                                  |
| cystic fibrosis                                     | 0.257436051 | 0.315537937 | 1 Cftr                                                   |
| dilated cardiomyopathy 1A                           | 0.257436051 | 0.315537937 | 1 Dot1l                                                  |
| Duchenne muscular dystrophy                         | 0.257436051 | 0.315537937 | 1 Dmd                                                    |
| erythropoietic protoporphyria                       | 0.257436051 | 0.315537937 | 1 Abcg2                                                  |
| Fanconi-like syndrome                               | 0.257436051 | 0.315537937 | 1 Slx1b                                                  |
| glycine encephalopathy                              | 0.257436051 | 0.315537937 | 1 Glcd                                                   |
| glycogen storage disease VII                        | 0.257436051 | 0.315537937 | 1 Hif1a                                                  |
| Guillain-Barre syndrome                             | 0.257436051 | 0.315537937 | 1 Aire                                                   |
| hemolytic-uremic syndrome                           | 0.257436051 | 0.315537937 | 1 C3                                                     |
| hereditary hemorrhagic telangiectasia               | 0.257436051 | 0.315537937 | 1 Eng                                                    |
| Hermansky-Pudlak syndrome 2                         | 0.257436051 | 0.315537937 | 1 Ap3d1                                                  |
| intestinal pseudo-obstruction                       | 0.257436051 | 0.315537937 | 1 Nup35                                                  |
| Lafora disease                                      | 0.257436051 | 0.315537937 | 1 Nhirc1                                                 |
| Lynch syndrome                                      | 0.257436051 | 0.315537937 | 1 Msh2                                                   |
| Menkes disease                                      | 0.257436051 | 0.315537937 | 1 Atp7a                                                  |

|                                                                                                      |             |             |                                          |
|------------------------------------------------------------------------------------------------------|-------------|-------------|------------------------------------------|
| microvillus inclusion disease                                                                        | 0.257436051 | 0.315537937 | 1 Myo5b                                  |
| narcolepsy                                                                                           | 0.257436051 | 0.315537937 | 1 Hcrtr2                                 |
| Netherton syndrome                                                                                   | 0.257436051 | 0.315537937 | 1 Dsg4                                   |
| nonepidermolytic palmoplantar keratoderma                                                            | 0.257436051 | 0.315537937 | 1 Rhbdf2                                 |
| Noonan syndrome                                                                                      | 0.257436051 | 0.315537937 | 1 Kat6b                                  |
| orofacial cleft                                                                                      | 0.257436051 | 0.315537937 | 1 Tfpap2a                                |
| ovarian cancer                                                                                       | 0.257436051 | 0.315537937 | 1 Ctnnb1                                 |
| Pendred Syndrome                                                                                     | 0.257436051 | 0.315537937 | 1 Slc26a4                                |
| platelet-type bleeding disorder 16                                                                   | 0.257436051 | 0.315537937 | 1 Itga2b                                 |
| recessive dystrophic epidermolysis bullosa                                                           | 0.257436051 | 0.315537937 | 1 Col7a1                                 |
| restrictive cardiomyopathy                                                                           | 0.257436051 | 0.315537937 | 1 Mypn                                   |
| Sertoli cell-only syndrome                                                                           | 0.257436051 | 0.315537937 | 1 Dmc1                                   |
| severe combined immunodeficiency, autosomal recessive, T cell-negative, B cell-negative, Nk cell-po  | 0.257436051 | 0.315537937 | 1 Prkdc                                  |
| severe combined immunodeficiency, autosomal recessive, T cell-negative, B cell-positive, Nk cell-pos | 0.257436051 | 0.315537937 | 1 Jak3                                   |
| spondyloepiphyseal dysplasia congenita                                                               | 0.257436051 | 0.315537937 | 1 Col2a1                                 |
| Stargardt disease                                                                                    | 0.257436051 | 0.315537937 | 1 Elovl4                                 |
| syndromic intellectual disability                                                                    | 0.257436051 | 0.315537937 | 1 Brpf1                                  |
| thanatophoric dysplasia                                                                              | 0.257436051 | 0.315537937 | 1 Fgfr3                                  |
| tuberous sclerosis                                                                                   | 0.257436051 | 0.315537937 | 1 Tsc2                                   |
| velocardiofacial syndrome                                                                            | 0.250819847 | 0.315537937 | 2 Chrd,Trappc10                          |
| Werdnig-Hoffmann disease                                                                             | 0.257436051 | 0.315537937 | 1 Vps54                                  |
| Wiskott-Aldrich syndrome                                                                             | 0.257436051 | 0.315537937 | 1 Foxp3                                  |
| visceral heterotaxy                                                                                  | 0.266623125 | 0.325667693 | 6 Ap1b1,Armc4,Dnaaf3,Megf8,Slit2,Tbc1d32 |
| breast cancer                                                                                        | 0.279743604 | 0.34051549  | 4 Brca2,Hgf,Smarca4,Wnt1                 |
| obesity                                                                                              | 0.294159819 | 0.356833046 | 6 Ankrd26,Kdm3a,Pcsk1,Prkci,Prox1,Tyk2   |
| hydrocephalus                                                                                        | 0.299685324 | 0.36229082  | 4 Add1,Ccdc85c,Celsr2,Ulk4               |
| Alzheimer's disease                                                                                  | 0.305630797 | 0.368217308 | 2 Lrp1,Plau                              |
| achalasia                                                                                            | 0.360123964 | 0.411403752 | 1 Nos1                                   |
| cutis laxa                                                                                           | 0.360123964 | 0.411403752 | 1 Ltbp4                                  |
| distal arthrogyposis                                                                                 | 0.360123964 | 0.411403752 | 1 Fbn2                                   |
| early infantile epileptic encephalopathy                                                             | 0.360123964 | 0.411403752 | 1 Scn8a                                  |
| epidermolytic hyperkeratosis                                                                         | 0.360123964 | 0.411403752 | 1 Krt1                                   |
| hereditary sensory neuropathy                                                                        | 0.360123964 | 0.411403752 | 1 Dst                                    |
| Hermansky-Pudlak syndrome 1                                                                          | 0.360123964 | 0.411403752 | 1 Ap3d1                                  |
| Hirschsprung's disease                                                                               | 0.359612821 | 0.411403752 | 2 Itgb1,Ret                              |
| nephronophthisis                                                                                     | 0.360123964 | 0.411403752 | 1 Cntrl                                  |
| Niemann-Pick disease                                                                                 | 0.360123964 | 0.411403752 | 1 Smpd1                                  |
| pulmonary alveolar proteinosis                                                                       | 0.360123964 | 0.411403752 | 1 Csf2rb                                 |
| renal tubular acidosis                                                                               | 0.360123964 | 0.411403752 | 1 Slc4a1                                 |
| Seckel syndrome                                                                                      | 0.360123964 | 0.411403752 | 1 Cenpj                                  |
| spondylocostal dysostosis                                                                            | 0.360123964 | 0.411403752 | 1 Tbx6                                   |
| type 1 diabetes mellitus                                                                             | 0.346521993 | 0.411403752 | 1 Ptpn2                                  |
| urinary bladder cancer                                                                               | 0.360123964 | 0.411403752 | 1 Ctnnb1                                 |
| amyotrophic lateral sclerosis                                                                        | 0.448615526 | 0.494879002 | 1 Zfp106                                 |
| aortic valve disease                                                                                 | 0.448615526 | 0.494879002 | 1 Rbpj                                   |
| asthma                                                                                               | 0.448615526 | 0.494879002 | 1 Tbx21                                  |
| centronuclear myopathy                                                                               | 0.448615526 | 0.494879002 | 1 Dnm2                                   |
| chronic myeloid leukemia                                                                             | 0.448615526 | 0.494879002 | 1 Sh2b3                                  |
| endogenous depression                                                                                | 0.448615526 | 0.494879002 | 1 Hap1                                   |
| Gilles de la Tourette syndrome                                                                       | 0.448615526 | 0.494879002 | 1 Hdc                                    |
| hereditary spherocytosis type 1                                                                      | 0.448615526 | 0.494879002 | 1 Ank1                                   |
| Leigh disease                                                                                        | 0.448615526 | 0.494879002 | 1 Parl                                   |
| myelofibrosis                                                                                        | 0.448615526 | 0.494879002 | 1 Ncor2                                  |
| neuronal ceroid lipofuscinosis 3                                                                     | 0.448615526 | 0.494879002 | 1 Cln3                                   |
| hepatocellular carcinoma                                                                             | 0.451636545 | 0.496659503 | 3 Foxm1,Plau,Uaca                        |
| amyotrophic lateral sclerosis type 1                                                                 | 0.524872768 | 0.568343826 | 1 Vps54                                  |
| cardiomyopathy                                                                                       | 0.524872768 | 0.568343826 | 1 Lrp1                                   |
| Huntington's disease                                                                                 | 0.524872768 | 0.568343826 | 1 Zdhc13                                 |
| lissencephaly                                                                                        | 0.524872768 | 0.568343826 | 1 Dag1                                   |
| neural tube defect                                                                                   | 0.524872768 | 0.568343826 | 1 Mthfr                                  |
| atrioventricular septal defect                                                                       | 0.590586637 | 0.626057306 | 1 Ifit172                                |
| clubfoot                                                                                             | 0.590586637 | 0.626057306 | 1 Ret                                    |
| Hermansky-Pudlak syndrome                                                                            | 0.590586637 | 0.626057306 | 1 Slc7a11                                |
| Meckel syndrome                                                                                      | 0.590586637 | 0.626057306 | 1 Tbc1d32                                |
| pre-eclampsia                                                                                        | 0.590586637 | 0.626057306 | 1 Notch2                                 |
| primary pulmonary hypertension                                                                       | 0.590586637 | 0.626057306 | 1 Bmpr2                                  |
| type 2 diabetes mellitus                                                                             | 0.587827163 | 0.626057306 | 5 Foxm1,Gadd45gip1,Irs2,Ppp1r3a,Prkci    |
| fatty liver disease                                                                                  | 0.637650377 | 0.673923902 | 2 Ikbkg,Plau                             |
| myelodysplastic syndrome                                                                             | 0.656537009 | 0.691813624 | 2 Asxl1,Crebbp                           |
| attention deficit hyperactivity disorder                                                             | 0.677132256 | 0.711391924 | 2 Brinp1,Per1                            |
| atopic dermatitis                                                                                    | 0.708189717 | 0.741812967 | 1 Traf3ip2                               |
| Sjogren's syndrome                                                                                   | 0.72093939  | 0.752933742 | 3 Aire,Fas,Traf3ip2                      |
| schizophrenia                                                                                        | 0.815134486 | 0.848797857 | 6 Chrna7,Cplx2,Lrrtm1,Nrxn1,Reln,Srgap3  |
| autism spectrum disorder                                                                             | 1           | 1           | 1 Chd8                                   |
| Charlevoix-Saguenay spastic ataxia                                                                   | 1           | 1           | 1 Sacs                                   |
| congestive heart failure                                                                             | 1           | 1           | 1 Med1                                   |
| hypertrophic cardiomyopathy                                                                          | 1           | 1           | 1 Pepd                                   |
| inflammatory bowel disease                                                                           | 1           | 1           | 1 Muc2                                   |
| malaria                                                                                              | 1           | 1           | 1 Ank1                                   |
| male infertility                                                                                     | 1           | 1           | 1 Bsc12                                  |
| osteoarthritis                                                                                       | 1           | 1           | 1 Erg                                    |
| osteoporosis                                                                                         | 1           | 1           | 1 Ifngr1                                 |
| prostate cancer                                                                                      | 1           | 1           | 1 Ctnnb1                                 |
| pulmonary emphysema                                                                                  | 1           | 1           | 1 Tlr4                                   |
| retinitis pigmentosa                                                                                 | 1           | 1           | 1 Pde6b                                  |
| sinoatrial node disease                                                                              | 1           | 1           | 1 Ank2                                   |
| tetralogy of Fallot                                                                                  | 1           | 1           | 1 Zfpm2                                  |

| DO                                                        | p_val_FET   | p_val_adj   | n_genes | genes_mutated                           |
|-----------------------------------------------------------|-------------|-------------|---------|-----------------------------------------|
| breast cancer                                             | 0.000141446 | 0.032674127 | 7       | Apc,Bard1,Brca1,Cav1,Erbb2,Pik3ca,Trp53 |
| osteogenesis imperfecta type 3                            | 0.000436939 | 0.050466505 | 3       | Col1a1,Col1a2,Smpd3                     |
| aceruloplasminemia                                        | 0.075926014 | 0.128021234 | 1       | Cp                                      |
| acute lymphocytic leukemia                                | 0.049362346 | 0.128021234 | 2       | Notch3,Pten                             |
| age related macular degeneration 4                        | 0.075926014 | 0.128021234 | 1       | Cfh                                     |
| aggressive periodontitis                                  | 0.075926014 | 0.128021234 | 1       | Postn                                   |
| Alstrom syndrome                                          | 0.075926014 | 0.128021234 | 1       | Alms1                                   |
| arrhythmogenic right ventricular dysplasia 12             | 0.075926014 | 0.128021234 | 1       | Jup                                     |
| asphyxiating thoracic dystrophy 1                         | 0.075926014 | 0.128021234 | 1       | lft140                                  |
| astrocytoma                                               | 0.075926014 | 0.128021234 | 1       | Hras                                    |
| atrioventricular septal defect                            | 0.070375067 | 0.128021234 | 2       | Bmp4,Nr1d2                              |
| autism spectrum disorder                                  | 0.018305326 | 0.128021234 | 3       | Gabrb3,Grin1,Slc9a9                     |
| autosomal dominant auditory neuropathy 1                  | 0.075926014 | 0.128021234 | 1       | Diaph3                                  |
| autosomal dominant keratitis-ichthyosis-deafness syndror  | 0.075926014 | 0.128021234 | 1       | Gjb2                                    |
| autosomal dominant nonsyndromic deafness 13               | 0.075926014 | 0.128021234 | 1       | Col11a2                                 |
| autosomal recessive limb-girdle muscular dystrophy type 1 | 0.075926014 | 0.128021234 | 1       | Dysf                                    |
| autosomal recessive nonsyndromic deafness                 | 0.075926014 | 0.128021234 | 1       | Atp6v1b1                                |
| autosomal recessive nonsyndromic deafness 3               | 0.075926014 | 0.128021234 | 1       | Myo15                                   |
| autosomal recessive spinocerebellar ataxia 16             | 0.075926014 | 0.128021234 | 1       | Stub1                                   |
| Axenfeld-Rieger syndrome type 3                           | 0.075926014 | 0.128021234 | 1       | Bmp4                                    |
| Bannayan-Riley-Ruvalcaba syndrome                         | 0.075926014 | 0.128021234 | 1       | Pten                                    |
| Bardet-Biedl syndrome 10                                  | 0.075926014 | 0.128021234 | 1       | Bbs10                                   |
| Bardet-Biedl syndrome 6                                   | 0.075926014 | 0.128021234 | 1       | Mkks                                    |
| basal cell carcinoma                                      | 0.075926014 | 0.128021234 | 1       | Ptch1                                   |
| benign neonatal seizures                                  | 0.00576144  | 0.128021234 | 2       | Kcnq2,Kcnq3                             |
| biotinidase deficiency                                    | 0.075926014 | 0.128021234 | 1       | Btd                                     |
| brain disease                                             | 0.075926014 | 0.128021234 | 1       | Pten                                    |
| Brugada syndrome 7                                        | 0.075926014 | 0.128021234 | 1       | Scn3b                                   |
| CADASIL 1                                                 | 0.075926014 | 0.128021234 | 1       | Notch3                                  |
| campomelic dysplasia                                      | 0.075926014 | 0.128021234 | 1       | Sox9                                    |
| Camurati-Engelmann disease                                | 0.075926014 | 0.128021234 | 1       | Mitf                                    |
| carnitine palmitoyltransferase I deficiency               | 0.075926014 | 0.128021234 | 1       | Cpt1a                                   |
| cataract 4 multiple types                                 | 0.075926014 | 0.128021234 | 1       | Crygd                                   |
| cerebellar ataxia                                         | 0.075926014 | 0.128021234 | 1       | Cacna1a                                 |
| cerebral cavernous malformation 3                         | 0.075926014 | 0.128021234 | 1       | Pdcd10                                  |
| CHARGE syndrome                                           | 0.016410442 | 0.128021234 | 2       | Chd2,Trp53                              |
| childhood electroclinical syndrome                        | 0.075926014 | 0.128021234 | 1       | Cacna1a                                 |
| cleft palate-lateral synechia syndrome                    | 0.075926014 | 0.128021234 | 1       | Bmp4                                    |
| CLOVES syndrome                                           | 0.075926014 | 0.128021234 | 1       | Pik3ca                                  |
| Coffin-Siris syndrome                                     | 0.075926014 | 0.128021234 | 1       | Arid1a                                  |
| cone-rod dystrophy 3                                      | 0.075926014 | 0.128021234 | 1       | Abca4                                   |
| congenital disorder of glycosylation type II              | 0.075926014 | 0.128021234 | 1       | Mgat2                                   |
| congenital myasthenic syndrome 9                          | 0.075926014 | 0.128021234 | 1       | Musk                                    |
| congenital stationary night blindness 1D                  | 0.075926014 | 0.128021234 | 1       | Slc24a1                                 |
| Costello syndrome                                         | 0.075926014 | 0.128021234 | 1       | Hras                                    |
| Cowden syndrome                                           | 0.075926014 | 0.128021234 | 1       | Pten                                    |
| diffuse large B-cell lymphoma                             | 0.075926014 | 0.128021234 | 1       | Trp53                                   |
| dilated cardiomyopathy 1HH                                | 0.075926014 | 0.128021234 | 1       | Bag3                                    |
| distal muscular dystrophy                                 | 0.075926014 | 0.128021234 | 1       | Dysf                                    |
| Duane-radial ray syndrome                                 | 0.075926014 | 0.128021234 | 1       | Sall4                                   |
| dyskeratosis congenita                                    | 0.016410442 | 0.128021234 | 2       | Dkc1,Trp53                              |
| endometrial cancer                                        | 0.03117248  | 0.128021234 | 2       | Pten,Trp53                              |
| enlarged vestibular aqueduct                              | 0.075926014 | 0.128021234 | 1       | Atp6v1b1                                |
| epidermal appendage tumor                                 | 0.075926014 | 0.128021234 | 1       | Tmem207                                 |
| epilepsy                                                  | 0.034987724 | 0.128021234 | 3       | Bsn,Cacna2d2,Cdyl                       |
| episodic ataxia type 2                                    | 0.075926014 | 0.128021234 | 1       | Cacna1a                                 |
| factor XI deficiency                                      | 0.075926014 | 0.128021234 | 1       | F11                                     |
| familial adenomatous polyposis                            | 0.075926014 | 0.128021234 | 1       | Apc                                     |
| familial hemiplegic migraine                              | 0.075926014 | 0.128021234 | 1       | Cacna1a                                 |
| Fraser syndrome                                           | 0.03117248  | 0.128021234 | 2       | Frem2,Grip1                             |
| generalized dystonia                                      | 0.075926014 | 0.128021234 | 1       | Cacna1a                                 |
| glioblastoma multiforme                                   | 0.075926014 | 0.128021234 | 1       | Trp53                                   |
| GrisCELLI syndrome type 1                                 | 0.075926014 | 0.128021234 | 1       | Myo5a                                   |
| growth hormone secreting pituitary adenoma                | 0.075926014 | 0.128021234 | 1       | Men1                                    |



| DO                                                          | p_val_FET   | p_val_adj   | n_genes | genes_mutated                                    |
|-------------------------------------------------------------|-------------|-------------|---------|--------------------------------------------------|
| achondroplasia                                              | 0.012129755 | 0.178699563 | 3       | Fgfr3,Npr2,Spred2                                |
| acromesomelic dysplasia, Maroteaux type                     | 0.113155778 | 0.178699563 | 1       | Npr2                                             |
| adult-onset autosomal dominant demyelinating leukodystrophy | 0.113155778 | 0.178699563 | 1       | Lmnb1                                            |
| age related macular degeneration 14                         | 0.113155778 | 0.178699563 | 1       | C2                                               |
| Alexander disease                                           | 0.113155778 | 0.178699563 | 1       | Gfap                                             |
| alkaptonuria                                                | 0.113155778 | 0.178699563 | 1       | Hgd                                              |
| alopecia universalis                                        | 0.113155778 | 0.178699563 | 1       | Hr                                               |
| alpha-mannosidosis                                          | 0.113155778 | 0.178699563 | 1       | Man2b1                                           |
| amyotrophic lateral sclerosis type 6                        | 0.113155778 | 0.178699563 | 1       | Fus                                              |
| angle-closure glaucoma                                      | 0.113155778 | 0.178699563 | 1       | Tfap2b                                           |
| aspartylglucosaminuria                                      | 0.113155778 | 0.178699563 | 1       | Aga                                              |
| asphyxiating thoracic dystrophy                             | 0.113155778 | 0.178699563 | 1       | Smarcad1                                         |
| asphyxiating thoracic dystrophy 2                           | 0.113155778 | 0.178699563 | 1       | lft80                                            |
| autoimmune polyendocrine syndrome type 1                    | 0.113155778 | 0.178699563 | 1       | Aire                                             |
| autosomal dominant disease                                  | 0.113155778 | 0.178699563 | 1       | Fgfr3                                            |
| autosomal dominant familial periodic fever                  | 0.113155778 | 0.178699563 | 1       | Tnfrsf1a                                         |
| autosomal dominant nonsyndromic deafness 36                 | 0.113155778 | 0.178699563 | 1       | Tmc1                                             |
| autosomal dominant Parkinson's disease 1                    | 0.113155778 | 0.178699563 | 1       | Snca                                             |
| autosomal dominant Parkinson's disease 4                    | 0.113155778 | 0.178699563 | 1       | Snca                                             |
| autosomal dominant pseudohypoadosteronism type 1            | 0.113155778 | 0.178699563 | 1       | Nr3c2                                            |
| autosomal recessive Alport syndrome                         | 0.001447261 | 0.178699563 | 3       | Col4a3,Col4a4,Mpv17                              |
| autosomal recessive limb-girdle muscular dystrophy type 2E  | 0.113155778 | 0.178699563 | 1       | Sgcb                                             |
| autosomal recessive limb-girdle muscular dystrophy type 2P  | 0.113155778 | 0.178699563 | 1       | Dag1                                             |
| autosomal recessive nonsyndromic deafness 18A               | 0.113155778 | 0.178699563 | 1       | Ush1c                                            |
| autosomal recessive nonsyndromic deafness 18B               | 0.113155778 | 0.178699563 | 1       | Otog                                             |
| autosomal recessive nonsyndromic deafness 22                | 0.113155778 | 0.178699563 | 1       | Otoa                                             |
| autosomal recessive nonsyndromic deafness 42                | 0.113155778 | 0.178699563 | 1       | lldr1                                            |
| autosomal recessive nonsyndromic deafness 68                | 0.113155778 | 0.178699563 | 1       | S1pr2                                            |
| autosomal recessive nonsyndromic deafness 7                 | 0.113155778 | 0.178699563 | 1       | Tmc1                                             |
| autosomal recessive nonsyndromic deafness 9                 | 0.113155778 | 0.178699563 | 1       | Otof                                             |
| autosomal recessive osteopetrosis 3                         | 0.113155778 | 0.178699563 | 1       | Car2                                             |
| autosomal recessive spinocerebellar ataxia 18               | 0.113155778 | 0.178699563 | 1       | Grid2                                            |
| Bardet-Biedl syndrome                                       | 0.113155778 | 0.178699563 | 1       | Tbc1d32                                          |
| Bardet-Biedl syndrome 8                                     | 0.113155778 | 0.178699563 | 1       | Ttc8                                             |
| Bartter disease                                             | 0.113155778 | 0.178699563 | 1       | Clcnkb                                           |
| Bartter disease type 3                                      | 0.113155778 | 0.178699563 | 1       | Clcnkb                                           |
| Becker muscular dystrophy                                   | 0.113155778 | 0.178699563 | 1       | Dmd                                              |
| beta-mannosidosis                                           | 0.113155778 | 0.178699563 | 1       | Manba                                            |
| Bietti crystalline corneoretinal dystrophy                  | 0.113155778 | 0.178699563 | 1       | Cyp4v3                                           |
| blepharophimosis, ptosis, and epicanthus inversus syndrome  | 0.113155778 | 0.178699563 | 1       | Foxl2                                            |
| Bloch-Sulzberger syndrome                                   | 0.113155778 | 0.178699563 | 1       | lkbkg                                            |
| bone development disease                                    | 0.113155778 | 0.178699563 | 1       | Npr2                                             |
| bone disease                                                | 0.113155778 | 0.178699563 | 1       | Npr3                                             |
| Brugada syndrome 1                                          | 0.113155778 | 0.178699563 | 1       | Scn5a                                            |
| Brunner Syndrome                                            | 0.113155778 | 0.178699563 | 1       | Maoa                                             |
| Budd-Chiari syndrome                                        | 0.113155778 | 0.178699563 | 1       | F5                                               |
| CAKUT                                                       | 0.113155778 | 0.178699563 | 1       | Lifr                                             |
| carbamoyl phosphate synthetase I deficiency disease         | 0.113155778 | 0.178699563 | 1       | Cps1                                             |
| Carpenter syndrome                                          | 0.113155778 | 0.178699563 | 1       | Megf8                                            |
| cataract 39 multiple types                                  | 0.113155778 | 0.178699563 | 1       | Crygb                                            |
| cerebral cavernous malformation                             | 0.113155778 | 0.178699563 | 1       | Krit1                                            |
| Charcot-Marie-Tooth disease axonal type 2K                  | 0.113155778 | 0.178699563 | 1       | Gdap1                                            |
| Charcot-Marie-Tooth disease type 2A2                        | 0.113155778 | 0.178699563 | 1       | Mfn2                                             |
| Charcot-Marie-Tooth disease type 4B2                        | 0.113155778 | 0.178699563 | 1       | Sbf2                                             |
| Charcot-Marie-Tooth disease X-linked dominant 1             | 0.113155778 | 0.178699563 | 1       | Gjb1                                             |
| Char syndrome                                               | 0.113155778 | 0.178699563 | 1       | Tfap2b                                           |
| Chediak-Higashi syndrome                                    | 0.113155778 | 0.178699563 | 1       | Lyst                                             |
| chondrodysplasia-pseudohermaphroditism syndrome             | 0.113155778 | 0.178699563 | 1       | Hhat                                             |
| choreaacanthocytosis                                        | 0.113155778 | 0.178699563 | 1       | Vps13a                                           |
| cleft palate                                                | 0.113155778 | 0.178699563 | 1       | Golgb1                                           |
| complement component 2 deficiency                           | 0.113155778 | 0.178699563 | 1       | C2                                               |
| Compton-North congenital myopathy                           | 0.113155778 | 0.178699563 | 1       | Cntn1                                            |
| congenital bile acid synthesis defect 5                     | 0.113155778 | 0.178699563 | 1       | Abcd3                                            |
| congenital hypothyroidism                                   | 0.052347526 | 0.178699563 | 3       | Duox2,Tpo,Trhr                                   |
| congenital merosin-deficient muscular dystrophy 1A          | 0.113155778 | 0.178699563 | 1       | Lama2                                            |
| congenital secretory chloride diarrhea 1                    | 0.113155778 | 0.178699563 | 1       | Slc26a3                                          |
| congenital stationary night blindness autosomal dominant 2  | 0.113155778 | 0.178699563 | 1       | Pde6b                                            |
| Cornelia de Lange syndrome                                  | 0.012799483 | 0.178699563 | 2       | Nipbl,Pds5a                                      |
| cutaneous porphyria                                         | 0.113155778 | 0.178699563 | 1       | Uros                                             |
| Dandy-Walker syndrome                                       | 0.035503925 | 0.178699563 | 2       | Zic1,Zic4                                        |
| Dent disease                                                | 0.113155778 | 0.178699563 | 1       | Clcn5                                            |
| dilated cardiomyopathy                                      | 0.031409067 | 0.178699563 | 9       | Dag1,Dicer1,Dnm1,Ilk,Med1,Myh6,Nr2f2,Pdcd1,Prox1 |
| dilated cardiomyopathy 1E                                   | 0.113155778 | 0.178699563 | 1       | Scn5a                                            |
| dilated cardiomyopathy 1EE                                  | 0.113155778 | 0.178699563 | 1       | Myh6                                             |
| Down syndrome                                               | 0.113155778 | 0.178699563 | 1       | Dyrk1a                                           |
| epilepsy                                                    | 0.094575881 | 0.178699563 | 3       | Aldh5a1,Kcna1,Scn8a                              |
| episodic ataxia type 1                                      | 0.113155778 | 0.178699563 | 1       | Kcna1                                            |
| exfoliation syndrome                                        | 0.113155778 | 0.178699563 | 1       | Lyst                                             |
| factor V deficiency                                         | 0.113155778 | 0.178699563 | 1       | F5                                               |
| familial cold autoinflammatory syndrome 4                   | 0.113155778 | 0.178699563 | 1       | Nlr4                                             |
| familial hemophagocytic lymphohistiocytosis 3               | 0.113155778 | 0.178699563 | 1       | Unc13d                                           |
| familial isolated deficiency of vitamin E                   | 0.113155778 | 0.178699563 | 1       | Ttpa                                             |
| familial Mediterranean fever                                | 0.113155778 | 0.178699563 | 1       | Mefv                                             |
| familial temporal lobe epilepsy 1                           | 0.113155778 | 0.178699563 | 1       | Lgi1                                             |
| Fanconi anemia                                              | 0.113155778 | 0.178699563 | 1       | Usp1                                             |
| Fanconi anemia complementation group A                      | 0.113155778 | 0.178699563 | 1       | Fanca                                            |
| Fanconi anemia complementation group C                      | 0.113155778 | 0.178699563 | 1       | Fancc                                            |
| Fanconi anemia complementation group D1                     | 0.113155778 | 0.178699563 | 1       | Brca2                                            |

|                                                                       |             |             |                                          |
|-----------------------------------------------------------------------|-------------|-------------|------------------------------------------|
| focal segmental glomerulosclerosis 2                                  | 0.113155778 | 0.178699563 | 1 Trpc6                                  |
| fucosidosis                                                           | 0.113155778 | 0.178699563 | 1 Fuca1                                  |
| gastroschisis                                                         | 0.113155778 | 0.178699563 | 1 Lrp1                                   |
| glycerol kinase deficiency                                            | 0.113155778 | 0.178699563 | 1 Gk                                     |
| GM2 gangliosidosis, AB variant                                        | 0.113155778 | 0.178699563 | 1 Gm2a                                   |
| Greig cephalopolysyndactyly syndrome                                  | 0.113155778 | 0.178699563 | 1 Gli3                                   |
| guanidinoacetate methyltransferase deficiency                         | 0.113155778 | 0.178699563 | 1 Gamt                                   |
| Hajdu-Cheney syndrome                                                 | 0.113155778 | 0.178699563 | 1 Notch2                                 |
| hereditary mucosal leukokeratosis                                     | 0.113155778 | 0.178699563 | 1 Krt4                                   |
| hereditary spastic paraplegia 2                                       | 0.113155778 | 0.178699563 | 1 Plp1                                   |
| hereditary spastic paraplegia 4                                       | 0.113155778 | 0.178699563 | 1 Spast                                  |
| hereditary spherocytosis type 4                                       | 0.113155778 | 0.178699563 | 1 Slc4a1                                 |
| hypertrophic cardiomyopathy 14                                        | 0.113155778 | 0.178699563 | 1 Myh6                                   |
| hypertrophic cardiomyopathy 4                                         | 0.113155778 | 0.178699563 | 1 Mybpc3                                 |
| hypertrophic pyloric stenosis                                         | 0.113155778 | 0.178699563 | 1 Nos1                                   |
| hypoparathyroidism                                                    | 0.113155778 | 0.178699563 | 1 Gcm2                                   |
| hypotonia-cystinuria syndrome                                         | 0.113155778 | 0.178699563 | 1 Camkmt                                 |
| hypotrichosis 4                                                       | 0.113155778 | 0.178699563 | 1 Hr                                     |
| immune dysregulation-polyendocrinopathy-enteropathy-X-linked syndrome | 0.113155778 | 0.178699563 | 1 Foxp3                                  |
| inflammatory bowel disease 1                                          | 0.113155778 | 0.178699563 | 1 Nod2                                   |
| isolated cleft palate                                                 | 0.113155778 | 0.178699563 | 1 Satb2                                  |
| Joubert syndrome                                                      | 0.113155778 | 0.178699563 | 1 Zic1                                   |
| junctional epidermolysis bullosa with pyloric atresia                 | 0.113155778 | 0.178699563 | 1 Itgb4                                  |
| Kabuki syndrome                                                       | 0.113155778 | 0.178699563 | 1 Kmt2d                                  |
| keratosis follicularis                                                | 0.113155778 | 0.178699563 | 1 Atp2a2                                 |
| Leber congenital amaurosis 5                                          | 0.113155778 | 0.178699563 | 1 Lca5                                   |
| Leber congenital amaurosis 6                                          | 0.113155778 | 0.178699563 | 1 Rpgrip1                                |
| Leber congenital amaurosis 8                                          | 0.113155778 | 0.178699563 | 1 Crb1                                   |
| Lennox-Gastaut syndrome                                               | 0.113155778 | 0.178699563 | 1 Dgkd                                   |
| Lesch-Nyhan syndrome                                                  | 0.113155778 | 0.178699563 | 1 Hpvt                                   |
| long QT syndrome 3                                                    | 0.113155778 | 0.178699563 | 1 Scn5a                                  |
| lymphocytic leukemia                                                  | 0.113155778 | 0.178699563 | 1 Tal1                                   |
| lysosomal storage disease                                             | 0.113155778 | 0.178699563 | 1 Slc17a5                                |
| megacystis-microcolon-intestinal hypoperistalsis syndrome             | 0.113155778 | 0.178699563 | 1 Chrm3                                  |
| mitochondrial DNA depletion syndrome 3                                | 0.113155778 | 0.178699563 | 1 Mpv17                                  |
| motor neuron disease                                                  | 0.113155778 | 0.178699563 | 1 Rhot1                                  |
| Mowat-Wilson syndrome                                                 | 0.113155778 | 0.178699563 | 1 Zeb2                                   |
| Muenke Syndrome                                                       | 0.113155778 | 0.178699563 | 1 Fgfr3                                  |
| multiple endocrine neoplasia type 2B                                  | 0.113155778 | 0.178699563 | 1 Ret                                    |
| MYH-9 related disease                                                 | 0.113155778 | 0.178699563 | 1 Myh9                                   |
| myositis                                                              | 0.113155778 | 0.178699563 | 1 H2-K1                                  |
| myotonia congenita                                                    | 0.113155778 | 0.178699563 | 1 Clcn1                                  |
| myotonic dystrophy type 1                                             | 0.113155778 | 0.178699563 | 1 Dmpk                                   |
| nemaline myopathy                                                     | 0.113155778 | 0.178699563 | 1 Klhl41                                 |
| neonatal diabetes mellitus with congenital hypothyroidism             | 0.113155778 | 0.178699563 | 1 Glis3                                  |
| neurodegeneration with brain iron accumulation 2a                     | 0.113155778 | 0.178699563 | 1 Pla2g6                                 |
| neuronal ceroid lipofuscinosis 2                                      | 0.113155778 | 0.178699563 | 1 Tpp1                                   |
| non-Hodgkin lymphoma                                                  | 0.012799483 | 0.178699563 | 2 Mtss1,S1pr2                            |
| omphalocele                                                           | 0.113155778 | 0.178699563 | 1 Lrp1                                   |
| osteogenesis imperfecta type 10                                       | 0.113155778 | 0.178699563 | 1 Serpinh1                               |
| osteogenesis imperfecta type 5                                        | 0.113155778 | 0.178699563 | 1 Suco                                   |
| osteopathia striata with cranial sclerosis                            | 0.113155778 | 0.178699563 | 1 Amer1                                  |
| ovarian disease                                                       | 0.113155778 | 0.178699563 | 1 Patl2                                  |
| Pallister-Hall syndrome                                               | 0.113155778 | 0.178699563 | 1 Gli3                                   |
| patterned macular dystrophy 2                                         | 0.113155778 | 0.178699563 | 1 Cttna1                                 |
| Pelizaeus-Merzbacher disease                                          | 0.113155778 | 0.178699563 | 1 Plp1                                   |
| pheochromocytoma                                                      | 0.113155778 | 0.178699563 | 1 Ret                                    |
| platelet storage pool deficiency                                      | 0.064733704 | 0.178699563 | 4 Ap3d1,Dock7,Lyst,Slc7a11               |
| polycystic liver disease                                              | 0.113155778 | 0.178699563 | 1 Prkcsb                                 |
| primary ciliary dyskinesia 23                                         | 0.113155778 | 0.178699563 | 1 Armc4                                  |
| primary ciliary dyskinesia 30                                         | 0.113155778 | 0.178699563 | 1 Ccdc151                                |
| primary open angle glaucoma                                           | 0.113155778 | 0.178699563 | 1 Gucy1a1                                |
| progressive familial heart block type IA                              | 0.113155778 | 0.178699563 | 1 Scn5a                                  |
| pseudohypoadosteronism                                                | 0.113155778 | 0.178699563 | 1 Klhl3                                  |
| pseudoxanthoma elasticum                                              | 0.113155778 | 0.178699563 | 1 Abcc6                                  |
| retinitis pigmentosa 1                                                | 0.113155778 | 0.178699563 | 1 Rp1                                    |
| retinitis pigmentosa 12                                               | 0.113155778 | 0.178699563 | 1 Crb1                                   |
| retinitis pigmentosa 40                                               | 0.113155778 | 0.178699563 | 1 Pde6b                                  |
| rhizomelic chondrodysplasia punctata type 2                           | 0.113155778 | 0.178699563 | 1 Gnpat                                  |
| Rothmund-Thomson syndrome                                             | 0.113155778 | 0.178699563 | 1 Recql4                                 |
| Rubinstein-Taybi syndrome                                             | 0.113155778 | 0.178699563 | 1 Crebbp                                 |
| salivary gland cancer                                                 | 0.113155778 | 0.178699563 | 1 Gon4l                                  |
| Schimke immuno-osseous dysplasia                                      | 0.113155778 | 0.178699563 | 1 Smarcal1                               |
| scoliosis                                                             | 0.113155778 | 0.178699563 | 1 Fgfr3                                  |
| severe congenital neutropenia                                         | 0.113155778 | 0.178699563 | 1 Gfi1                                   |
| Shwachman-Diamond syndrome                                            | 0.012799483 | 0.178699563 | 2 Sbds,Serpin2                           |
| sialuria                                                              | 0.113155778 | 0.178699563 | 1 Slc17a5                                |
| skin disease                                                          | 0.113155778 | 0.178699563 | 1 Fyn                                    |
| skin squamous cell carcinoma                                          | 0.113155778 | 0.178699563 | 1 Fyn                                    |
| spinocerebellar ataxia type 27                                        | 0.113155778 | 0.178699563 | 1 Fgf14                                  |
| systemic lupus erythematosus                                          | 0.078323023 | 0.178699563 | 7 C4b,Fas,lfi1,Jak1,Pdcd1,Ptprc,Traf3ip2 |
| Tangier disease                                                       | 0.113155778 | 0.178699563 | 1 Abca1                                  |
| T-cell adult acute lymphocytic leukemia                               | 0.012799483 | 0.178699563 | 2 Cntn2,Zeb2                             |
| temporal lobe epilepsy                                                | 0.113155778 | 0.178699563 | 1 Kcna1                                  |
| urofacial syndrome                                                    | 0.113155778 | 0.178699563 | 1 Hpse2                                  |
| Usher syndrome type 1C                                                | 0.113155778 | 0.178699563 | 1 Ush1c                                  |
| Usher syndrome type 2C                                                | 0.012799483 | 0.178699563 | 2 Adgrv1,Slc4a7                          |
| uterine fibroid                                                       | 0.113155778 | 0.178699563 | 1 Tsc2                                   |
| VACTERL association                                                   | 0.022228468 | 0.178699563 | 3 lft172,Qsox1,Tbc1d32                   |

|                                                                                                     |             |             |                                       |
|-----------------------------------------------------------------------------------------------------|-------------|-------------|---------------------------------------|
| vesicoureteral reflux                                                                               | 0.113155778 | 0.178699563 | 1 Upk3a                               |
| Weaver syndrome                                                                                     | 0.113155778 | 0.178699563 | 1 Ezh2                                |
| Wolcott-Rallison syndrome                                                                           | 0.113155778 | 0.178699563 | 1 Eif2ak3                             |
| xeroderma pigmentosum                                                                               | 0.113155778 | 0.178699563 | 1 Terf2                               |
| xeroderma pigmentosum group C                                                                       | 0.113155778 | 0.178699563 | 1 Xpc                                 |
| X-linked Alport syndrome                                                                            | 0.113155778 | 0.178699563 | 1 Col4a5                              |
| breast cancer                                                                                       | 0.11756921  | 0.184660336 | 4 Brca2,Hgf,Smarca4,Wnt1              |
| microcephaly                                                                                        | 0.141029903 | 0.219127108 | 2 Kif20b,Mcph1                        |
| rheumatoid arthritis                                                                                | 0.141029903 | 0.219127108 | 2 Mmp14,Zfp36                         |
| abdominal obesity-metabolic syndrome                                                                | 0.183176221 | 0.269454102 | 2 Prkci,Sirt3                         |
| acute myeloid leukemia                                                                              | 0.183176221 | 0.269454102 | 2 Arid4a,Crebbp                       |
| agnathia-otocephaly complex                                                                         | 0.213512074 | 0.269454102 | 1 Trappc10                            |
| asphyxiating thoracic dystrophy 3                                                                   | 0.213512074 | 0.269454102 | 1 Ift80                               |
| atrachia with papular lesions                                                                       | 0.213512074 | 0.269454102 | 1 Hr                                  |
| autoimmune lymphoproliferative syndrome                                                             | 0.213512074 | 0.269454102 | 1 Fas                                 |
| autosomal recessive Robinow syndrome                                                                | 0.213512074 | 0.269454102 | 1 Ror2                                |
| chromosome 1p36 deletion syndrome                                                                   | 0.213512074 | 0.269454102 | 1 Kcnab2                              |
| Cockayne syndrome                                                                                   | 0.213512074 | 0.269454102 | 1 Ercc6                               |
| common variable immunodeficiency                                                                    | 0.213512074 | 0.269454102 | 1 Icos                                |
| congenital generalized lipodystrophy type 2                                                         | 0.213512074 | 0.269454102 | 1 Bsc12                               |
| coronary artery disease                                                                             | 0.213512074 | 0.269454102 | 1 Abcc9                               |
| cystic fibrosis                                                                                     | 0.213512074 | 0.269454102 | 1 Cftr                                |
| dilated cardiomyopathy 1A                                                                           | 0.213512074 | 0.269454102 | 1 Dot1l                               |
| Duchenne muscular dystrophy                                                                         | 0.213512074 | 0.269454102 | 1 Dmd                                 |
| erythropoietic protoporphyria                                                                       | 0.213512074 | 0.269454102 | 1 Abcg2                               |
| Fanconi-like syndrome                                                                               | 0.213512074 | 0.269454102 | 1 Slx1b                               |
| glycine encephalopathy                                                                              | 0.213512074 | 0.269454102 | 1 Glcd                                |
| glycogen storage disease V                                                                          | 0.213512074 | 0.269454102 | 1 Pygm                                |
| Guillain-Barre syndrome                                                                             | 0.213512074 | 0.269454102 | 1 Aire                                |
| hereditary hemorrhagic telangiectasia                                                               | 0.213512074 | 0.269454102 | 1 Eng                                 |
| Hermansky-Pudlak syndrome 2                                                                         | 0.213512074 | 0.269454102 | 1 Ap3d1                               |
| intestinal pseudo-obstruction                                                                       | 0.213512074 | 0.269454102 | 1 Nup35                               |
| Kartagener syndrome                                                                                 | 0.175336908 | 0.269454102 | 3 Ap1b1,Armc4,Ccdc151                 |
| Lafora disease                                                                                      | 0.213512074 | 0.269454102 | 1 Nhlc1                               |
| Lynch syndrome                                                                                      | 0.213512074 | 0.269454102 | 1 Msh2                                |
| Menkes disease                                                                                      | 0.213512074 | 0.269454102 | 1 Atp7a                               |
| narcolepsy                                                                                          | 0.213512074 | 0.269454102 | 1 Hcrtr2                              |
| Netherton syndrome                                                                                  | 0.213512074 | 0.269454102 | 1 Dsg4                                |
| nonepidermolytic palmoplantar keratoderma                                                           | 0.213512074 | 0.269454102 | 1 Rhbdf2                              |
| Noonan syndrome                                                                                     | 0.213512074 | 0.269454102 | 1 Kat6b                               |
| orofacial cleft                                                                                     | 0.213512074 | 0.269454102 | 1 Tfp2a                               |
| Pierson syndrome                                                                                    | 0.213512074 | 0.269454102 | 1 Tns2                                |
| platelet-type bleeding disorder 16                                                                  | 0.213512074 | 0.269454102 | 1 Itga2b                              |
| restrictive cardiomyopathy                                                                          | 0.213512074 | 0.269454102 | 1 Mypn                                |
| Sertoli cell-only syndrome                                                                          | 0.213512074 | 0.269454102 | 1 Dmc1                                |
| severe combined immunodeficiency, autosomal recessive, T cell-negative, B cell-negative, Nk cell-po | 0.213512074 | 0.269454102 | 1 Prkdc                               |
| Stargardt disease                                                                                   | 0.213512074 | 0.269454102 | 1 Elovl4                              |
| thanatophoric dysplasia                                                                             | 0.213512074 | 0.269454102 | 1 Fgfr3                               |
| tuberous sclerosis                                                                                  | 0.213512074 | 0.269454102 | 1 Tsc2                                |
| velocardiofacial syndrome                                                                           | 0.183176221 | 0.269454102 | 2 Chrd,Trappc10                       |
| Werdnig-Hoffmann disease                                                                            | 0.213512074 | 0.269454102 | 1 Vps54                               |
| Wiskott-Aldrich syndrome                                                                            | 0.213512074 | 0.269454102 | 1 Foxp3                               |
| Alzheimer's disease                                                                                 | 0.226785785 | 0.284961269 | 2 Lrp1,Plau                           |
| Hirschsprung's disease                                                                              | 0.270988242 | 0.33902858  | 2 Itgb1,Ret                           |
| achalasia                                                                                           | 0.302516148 | 0.362768327 | 1 Nos1                                |
| arteriovenous malformations of the brain                                                            | 0.302516148 | 0.362768327 | 1 Eng                                 |
| early infantile epileptic encephalopathy                                                            | 0.302516148 | 0.362768327 | 1 Scn8a                               |
| epidermolytic hyperkeratosis                                                                        | 0.302516148 | 0.362768327 | 1 Krt1                                |
| Hermansky-Pudlak syndrome 1                                                                         | 0.302516148 | 0.362768327 | 1 Ap3d1                               |
| Niemann-Pick disease                                                                                | 0.302516148 | 0.362768327 | 1 Smpd1                               |
| pulmonary alveolar proteinosis                                                                      | 0.302516148 | 0.362768327 | 1 Csf2rb                              |
| renal tubular acidosis                                                                              | 0.302516148 | 0.362768327 | 1 Slc4a1                              |
| Seckel syndrome                                                                                     | 0.302516148 | 0.362768327 | 1 Cenpj                               |
| type I Ehlers-Danlos syndrome                                                                       | 0.302516148 | 0.362768327 | 1 Col5a1                              |
| fatty liver disease                                                                                 | 0.315091333 | 0.374738252 | 2 Ikbkg,Plau                          |
| Williams-Beuren syndrome                                                                            | 0.315091333 | 0.374738252 | 2 Gtf2i,Limk1                         |
| congenital diaphragmatic hernia                                                                     | 0.358551759 | 0.422944728 | 2 Lrp1,Nr2f2                          |
| myelodysplastic syndrome                                                                            | 0.358551759 | 0.422944728 | 2 Asxl1,Crebbp                        |
| amyotrophic lateral sclerosis                                                                       | 0.381451679 | 0.432311903 | 1 Zfp106                              |
| aortic valve disease                                                                                | 0.381451679 | 0.432311903 | 1 Rbpj                                |
| asthma                                                                                              | 0.381451679 | 0.432311903 | 1 Tbx21                               |
| centronuclear myopathy                                                                              | 0.381451679 | 0.432311903 | 1 Dnm2                                |
| chronic myeloid leukemia                                                                            | 0.381451679 | 0.432311903 | 1 Sh2b3                               |
| endogenous depression                                                                               | 0.381451679 | 0.432311903 | 1 Hap1                                |
| Gilles de la Tourette syndrome                                                                      | 0.381451679 | 0.432311903 | 1 Hdc                                 |
| Leigh disease                                                                                       | 0.381451679 | 0.432311903 | 1 Parl                                |
| neuronal ceroid lipofuscinosis 3                                                                    | 0.381451679 | 0.432311903 | 1 Cln3                                |
| obesity                                                                                             | 0.378912033 | 0.432311903 | 5 Ankrd26,Kdm3a,Pcsk1,Prkci,Prox1     |
| Sjogren's syndrome                                                                                  | 0.430762268 | 0.486290217 | 3 Aire,Fas,Traf3ip2                   |
| acute lymphocytic leukemia                                                                          | 0.451457242 | 0.494208875 | 1 Ezh2                                |
| amyotrophic lateral sclerosis type 1                                                                | 0.451457242 | 0.494208875 | 1 Vps54                               |
| cardiomyopathy                                                                                      | 0.451457242 | 0.494208875 | 1 Lrp1                                |
| hydrocephalus                                                                                       | 0.448612589 | 0.494208875 | 3 Add1,Ccdc85c,Celsr2                 |
| junctional epidermolysis bullosa non-Herlitz type                                                   | 0.451457242 | 0.494208875 | 1 Itgb4                               |
| lissencephaly                                                                                       | 0.451457242 | 0.494208875 | 1 Dag1                                |
| lung cancer                                                                                         | 0.451457242 | 0.494208875 | 1 Xpc                                 |
| neural tube defect                                                                                  | 0.451457242 | 0.494208875 | 1 Mthfr                               |
| autistic disorder                                                                                   | 0.468931862 | 0.511401163 | 6 Brinp1,Crebbp,Gstm1,Nrxn1,Tbr1,Tsc2 |
| atrioventricular septal defect                                                                      | 0.51354271  | 0.547652558 | 1 Ift172                              |

|                                          |             |             |                                    |
|------------------------------------------|-------------|-------------|------------------------------------|
| clubfoot                                 | 0.51354271  | 0.547652558 | 1 Ret                              |
| Hermansky-Pudlak syndrome                | 0.51354271  | 0.547652558 | 1 Slc7a11                          |
| Meckel syndrome                          | 0.51354271  | 0.547652558 | 1 Tbc1d32                          |
| nephrotic syndrome                       | 0.51354271  | 0.547652558 | 1 Mpv17                            |
| pre-eclampsia                            | 0.51354271  | 0.547652558 | 1 Notch2                           |
| visceral heterotaxy                      | 0.55077421  | 0.585197598 | 4 Ap1b1,Armc4,Megf8,Tbc1d32        |
| type 2 diabetes mellitus                 | 0.563466415 | 0.596490088 | 4 Gadd45gip1,Irs2,Ppp1r3a,Prkci    |
| male infertility                         | 0.568603792 | 0.597550894 | 1 Bsc12                            |
| osteoporosis                             | 0.568603792 | 0.597550894 | 1 Ifngr1                           |
| DiGeorge syndrome                        | 0.684005275 | 0.716222915 | 2 Chrd,Dicer1                      |
| type 1 diabetes mellitus                 | 0.719755701 | 0.750936453 | 1 Ptprn2                           |
| schizophrenia                            | 0.798230391 | 0.829815047 | 5 Chrna7,Cplx2,Lrrtm1,Nrxn1,Srgap3 |
| atopic dermatitis                        | 1           | 1           | 1 Traf3ip2                         |
| attention deficit hyperactivity disorder | 1           | 1           | 1 Brinp1                           |
| Charlevoix-Saguenay spastic ataxia       | 1           | 1           | 1 Sacs                             |
| congestive heart failure                 | 1           | 1           | 1 Med1                             |
| cystic kidney disease                    | 1           | 1           | 1 Dnm2                             |
| hepatocellular carcinoma                 | 1           | 1           | 1 Plau                             |
| hypertrophic cardiomyopathy              | 1           | 1           | 1 Pepd                             |
| inflammatory bowel disease               | 1           | 1           | 1 Muc2                             |
| osteoarthritis                           | 1           | 1           | 1 Erg                              |
| primary ciliary dyskinesia               | 1           | 1           | 1 Ap1b1                            |
| retinitis pigmentosa                     | 1           | 1           | 1 Pde6b                            |

| DO                                                                                                   | p_val_FET   | p_val_adj   | n_genes | genes_mutated      |
|------------------------------------------------------------------------------------------------------|-------------|-------------|---------|--------------------|
| achondrogenesis type IA                                                                              | 0.025119447 | 0.064592865 | 1       | Trip11             |
| achondrogenesis type II                                                                              | 0.025119447 | 0.064592865 | 1       | Col2a1             |
| age related macular degeneration 9                                                                   | 0.025119447 | 0.064592865 | 1       | C3                 |
| autosomal dominant Parkinson's disease 8                                                             | 0.025119447 | 0.064592865 | 1       | Lrrk2              |
| autosomal recessive nonsyndromic deafness 2                                                          | 0.025119447 | 0.064592865 | 1       | Myo7a              |
| cataract 1 multiple types                                                                            | 0.025119447 | 0.064592865 | 1       | Gja8               |
| Charcot-Marie-Tooth disease axonal type 2O                                                           | 0.025119447 | 0.064592865 | 1       | Dync1h1            |
| Charcot-Marie-Tooth disease type 2A1                                                                 | 0.025119447 | 0.064592865 | 1       | Kif1b              |
| Charcot-Marie-Tooth disease type 4D                                                                  | 0.025119447 | 0.064592865 | 1       | Ndrgr1             |
| complement component 3 deficiency                                                                    | 0.025119447 | 0.064592865 | 1       | C3                 |
| cone-rod dystrophy 9                                                                                 | 0.025119447 | 0.064592865 | 1       | Adam9              |
| congenital stationary night blindness 2A                                                             | 0.025119447 | 0.064592865 | 1       | Cacna1f            |
| craniofrontonasal syndrome                                                                           | 0.025119447 | 0.064592865 | 1       | Efnb1              |
| cystic kidney disease                                                                                | 0.020169655 | 0.064592865 | 2       | Robo1,Slit2        |
| granulosa cell tumor                                                                                 | 0.025119447 | 0.064592865 | 1       | Ctnnb1             |
| hereditary sensory and autonomic neuropathy type 6                                                   | 0.025119447 | 0.064592865 | 1       | Dst                |
| hereditary spastic paraplegia 15                                                                     | 0.025119447 | 0.064592865 | 1       | Zfyve26            |
| inflammatory bowel disease 12                                                                        | 0.025119447 | 0.064592865 | 1       | Gnai2              |
| isolated anhidrosis with normal sweat glands                                                         | 0.025119447 | 0.064592865 | 1       | Itpr2              |
| Joubert syndrome 26                                                                                  | 0.025119447 | 0.064592865 | 1       | D430042O09Rik      |
| junctional epidermolysis bullosa                                                                     | 0.025119447 | 0.064592865 | 1       | Lama3              |
| karyomegalic interstitial nephritis                                                                  | 0.025119447 | 0.064592865 | 1       | Fan1               |
| lung cancer                                                                                          | 0.005988892 | 0.064592865 | 2       | Foxm1,Robo1        |
| meconium aspiration syndrome                                                                         | 0.025119447 | 0.064592865 | 1       | Atf2               |
| mitral valve prolapse                                                                                | 0.025119447 | 0.064592865 | 1       | Dchs1              |
| nephrosis                                                                                            | 0.025119447 | 0.064592865 | 1       | Lamb2              |
| osteochondrodysplasia                                                                                | 0.025119447 | 0.064592865 | 1       | Atf2               |
| peripheral T-cell lymphoma                                                                           | 0.025119447 | 0.064592865 | 1       | Rc3h1              |
| Potocki-Lupski syndrome                                                                              | 0.025119447 | 0.064592865 | 1       | Rai1               |
| primary ciliary dyskinesia 2                                                                         | 0.025119447 | 0.064592865 | 1       | Dnaaf3             |
| Smith-Magenis syndrome                                                                               | 0.025119447 | 0.064592865 | 1       | Rai1               |
| spondyloepimetaphyseal dysplasia                                                                     | 0.025119447 | 0.064592865 | 1       | Col2a1             |
| tricuspid atresia                                                                                    | 0.025119447 | 0.064592865 | 1       | Zfpm2              |
| Usher syndrome type 1                                                                                | 0.025119447 | 0.064592865 | 1       | Myo7a              |
| X-linked cleft palate with or without ankyloglossia                                                  | 0.025119447 | 0.064592865 | 1       | Tbx22              |
| primary ciliary dyskinesia                                                                           | 0.029811054 | 0.074527635 | 2       | Slit2,Spef2        |
| age related macular degeneration 1                                                                   | 0.049609067 | 0.082681778 | 1       | Vldlr              |
| ARC syndrome                                                                                         | 0.049609067 | 0.082681778 | 1       | Vps33b             |
| autosomal recessive osteopetrosis 1                                                                  | 0.049609067 | 0.082681778 | 1       | Ccdc154            |
| Beckwith-Wiedemann syndrome                                                                          | 0.049609067 | 0.082681778 | 1       | Sptbn1             |
| cardiofaciocutaneous syndrome                                                                        | 0.049609067 | 0.082681778 | 1       | Map2k1             |
| congenital fibrosis of the extraocular muscles                                                       | 0.049609067 | 0.082681778 | 1       | Kif21a             |
| glycogen storage disease V                                                                           | 0.049609067 | 0.082681778 | 1       | Hif1a              |
| glycogen storage disease VII                                                                         | 0.049609067 | 0.082681778 | 1       | Hif1a              |
| hemolytic-uremic syndrome                                                                            | 0.049609067 | 0.082681778 | 1       | C3                 |
| Kartagener syndrome                                                                                  | 0.040906383 | 0.082681778 | 2       | Dnaaf3,Slit2       |
| microvillus inclusion disease                                                                        | 0.049609067 | 0.082681778 | 1       | Myo5b              |
| ovarian cancer                                                                                       | 0.049609067 | 0.082681778 | 1       | Ctnnb1             |
| Pendred Syndrome                                                                                     | 0.049609067 | 0.082681778 | 1       | Slc26a4            |
| Pierson syndrome                                                                                     | 0.049609067 | 0.082681778 | 1       | Lamb2              |
| recessive dystrophic epidermolysis bullosa                                                           | 0.049609067 | 0.082681778 | 1       | Col7a1             |
| severe combined immunodeficiency, autosomal recessive, T cell-negative, B cell-positive, Nk cell-po: | 0.049609067 | 0.082681778 | 1       | Jak3               |
| spondyloepiphyseal dysplasia congenita                                                               | 0.049609067 | 0.082681778 | 1       | Col2a1             |
| syndromic intellectual disability                                                                    | 0.049609067 | 0.082681778 | 1       | Brpf1              |
| DiGeorge syndrome                                                                                    | 0.053288217 | 0.085641778 | 2       | Kat6a,Zfp366       |
| hepatocellular carcinoma                                                                             | 0.053288217 | 0.085641778 | 2       | Foxm1,Uaca         |
| arteriovenous malformations of the brain                                                             | 0.073484621 | 0.103337748 | 1       | Notch4             |
| cutis laxa                                                                                           | 0.073484621 | 0.103337748 | 1       | Ltbp4              |
| distal arthrogyposis                                                                                 | 0.073484621 | 0.103337748 | 1       | Fbn2               |
| hereditary sensory neuropathy                                                                        | 0.073484621 | 0.103337748 | 1       | Dst                |
| nephronophthisis                                                                                     | 0.073484621 | 0.103337748 | 1       | Cntrl              |
| spondylocostal dysostosis                                                                            | 0.073484621 | 0.103337748 | 1       | Tbx6               |
| type I Ehlers-Danlos syndrome                                                                        | 0.073484621 | 0.103337748 | 1       | Col5a2             |
| urinary bladder cancer                                                                               | 0.073484621 | 0.103337748 | 1       | Ctnnb1             |
| autistic disorder                                                                                    | 0.088153425 | 0.122058588 | 3       | Cadps2,Ctnnb1,Nrp2 |
| hereditary spherocytosis type 1                                                                      | 0.096761479 | 0.129978106 | 1       | Ank1               |
| myelofibrosis                                                                                        | 0.096761479 | 0.129978106 | 1       | Ncor2              |
| acute lymphocytic leukemia                                                                           | 0.119454625 | 0.153584518 | 1       | Kmt2a              |
| Huntington's disease                                                                                 | 0.119454625 | 0.153584518 | 1       | Zdhhc13            |
| junctional epidermolysis bullosa non-Herlitz type                                                    | 0.119454625 | 0.153584518 | 1       | Lama3              |
| microcephaly                                                                                         | 0.141578672 | 0.174549047 | 1       | Aspm               |
| nephrotic syndrome                                                                                   | 0.141578672 | 0.174549047 | 1       | Itsn2              |
| primary pulmonary hypertension                                                                       | 0.141578672 | 0.174549047 | 1       | Bmpr2              |

|                                          |             |             |                |
|------------------------------------------|-------------|-------------|----------------|
| visceral heterotaxy                      | 0.155544765 | 0.189176066 | 2 Dnaaf3,Slit2 |
| acute myeloid leukemia                   | 0.163147863 | 0.193201417 | 1 Kmt2a        |
| malaria                                  | 0.163147863 | 0.193201417 | 1 Ank1         |
| autism spectrum disorder                 | 0.18417609  | 0.209820862 | 1 Chd8         |
| prostate cancer                          | 0.18417609  | 0.209820862 | 1 Ctnnb1       |
| systemic lupus erythematosus             | 0.182470735 | 0.209820862 | 2 Ep300,Rc3h1  |
| pulmonary emphysema                      | 0.204676894 | 0.230261506 | 1 Tlr4         |
| Williams-Beuren syndrome                 | 0.22466348  | 0.249626089 | 1 Baz1b        |
| congenital diaphragmatic hernia          | 0.244148723 | 0.267968111 | 1 Zfpn2        |
| attention deficit hyperactivity disorder | 0.263145175 | 0.285338141 | 1 Per1         |
| tetralogy of Fallot                      | 0.281665074 | 0.301784008 | 1 Zfpn2        |
| hydrocephalus                            | 0.367523657 | 0.389142696 | 1 Ulk4         |
| type 2 diabetes mellitus                 | 0.522057467 | 0.546339209 | 1 Foxm1        |
| obesity                                  | 0.534079612 | 0.55249615  | 1 Tyk2         |
| dilated cardiomyopathy                   | 0.610193493 | 0.624061527 | 1 Cenpf        |
| schizophrenia                            |             | 1           | 1 Reln         |
| sinoatrial node disease                  |             | 1           | 1 Ank2         |

## Supplementary Figures

**Figure S1.** Validation of *Ppara*<sup>ΔE</sup> mice.

**Figure S2.** Intestine-specific knockout of PPARα increased AOM and DSS-induced colon carcinogenesis.

**Figure S3.** Several methylation related metabolites were increased in the urine of tumor-bearing *Ppara*<sup>ΔE</sup> mice.

**Figure S4.** Validation of metabolites by MS/MS fragmentation reactions.

**Figure S5.** The levels of ADMA and SDMA in the serum.

**Figure S6.** Silence DNMT1 and PRMT6 increased the expression of p21 and p27, respectively.

**Figure S7.** PPARα regulated the expression of p21 and p27 partially through DNMT1 and PRMT6 in the intestine.

**Figure S8.** Silence RB1 increased the expression of DNMT1 and PRMT6.

**Figure S9.** Intestinal PPARα regulated the expression of RB1.

**Figure S10.** PPARα bound to the *Rb1* promoter in HCT116 cells.

**Figure S11.** Fenofibrate decreased AOM and DSS-induced colon carcinogenesis in human *PPARA* transgenic mice.

**Figure S12.** The expression of PPARα, RB1, DNMT1, PRMT6, p21, p27 and Ki67 in human colon specimens.

**Figure S13.** High or moderate impact somatic mutations in tumors derived from AOM and DSS-administered *Ppara*<sup>fl/fl</sup> and *Ppara*<sup>ΔE</sup> mice.

**Figure S14.** A schematic model of the mechanism by which intestinal PPARα protects against colon carcinogenesis.

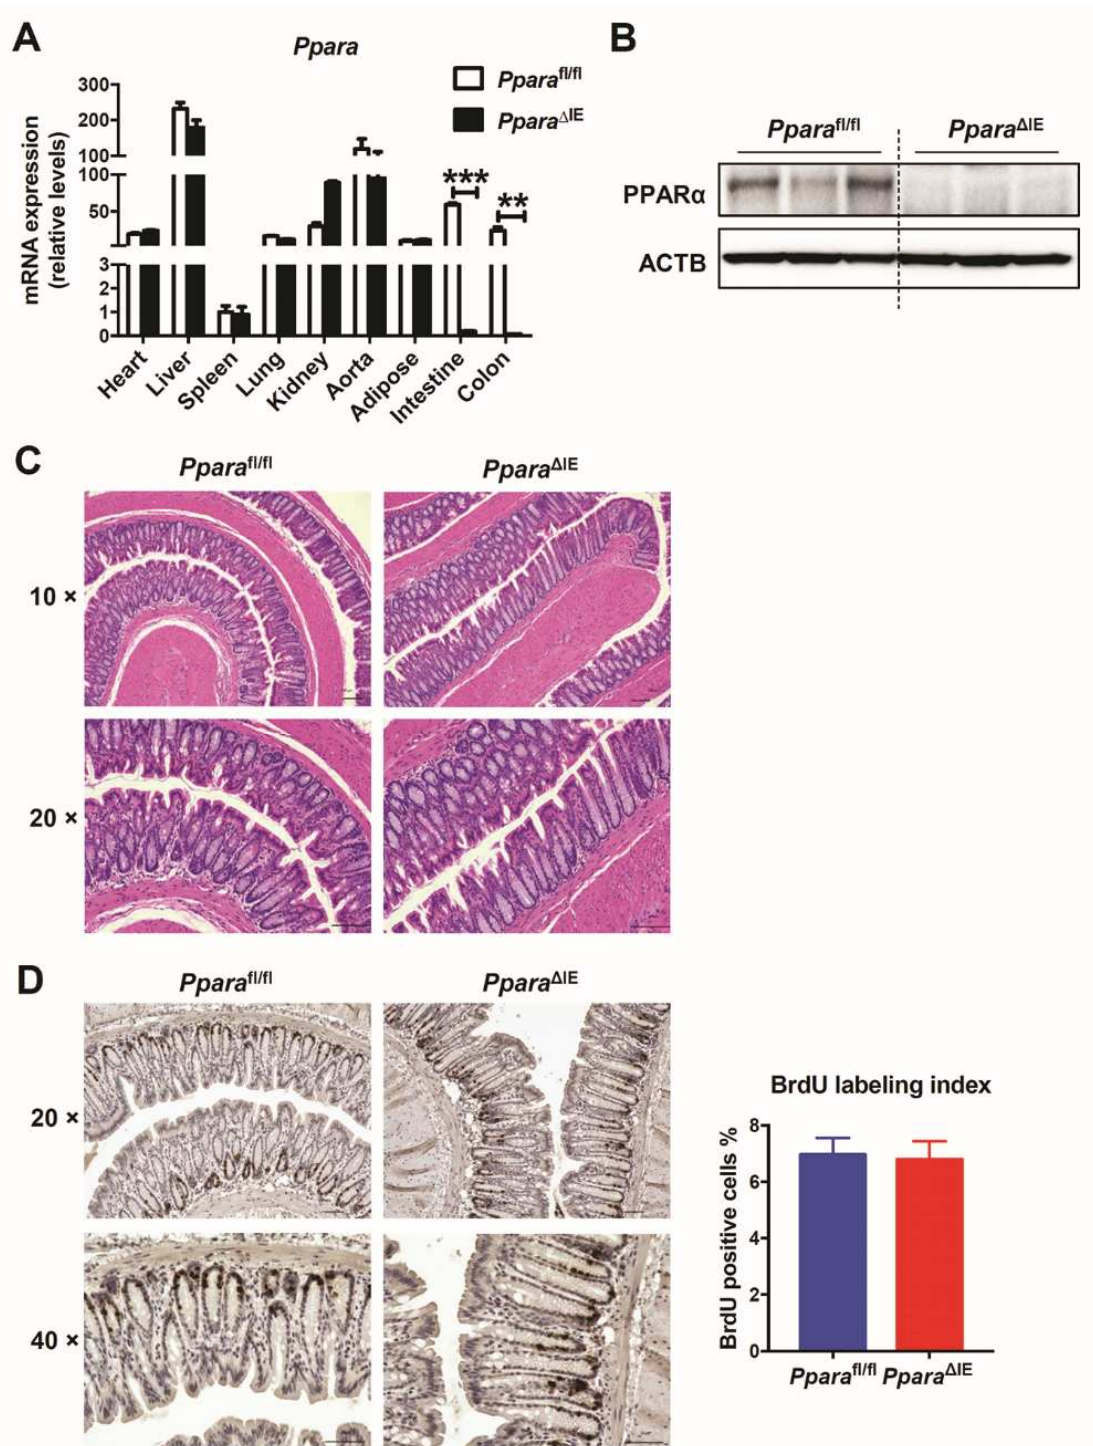

**Figure S1. Validation of *Ppara*<sup>ΔIE</sup> mice.** (A) *Ppara* mRNA levels in different tissues of *Ppara*<sup>fl/fl</sup> and *Ppara*<sup>ΔIE</sup> mice (n=3 mice/group). \*\*  $P < 0.01$ , \*\*\*  $P < 0.001$ . (B) PPARα protein levels in the colon of *Ppara*<sup>fl/fl</sup> and *Ppara*<sup>ΔIE</sup> mice. (C) Representative H&E staining of colon sections. Scale bars: 100 μm. (D) *Left*, Representative BrdU staining of colon sections. Scale bars: 50 μm. *Right*, BrdU labeling index.



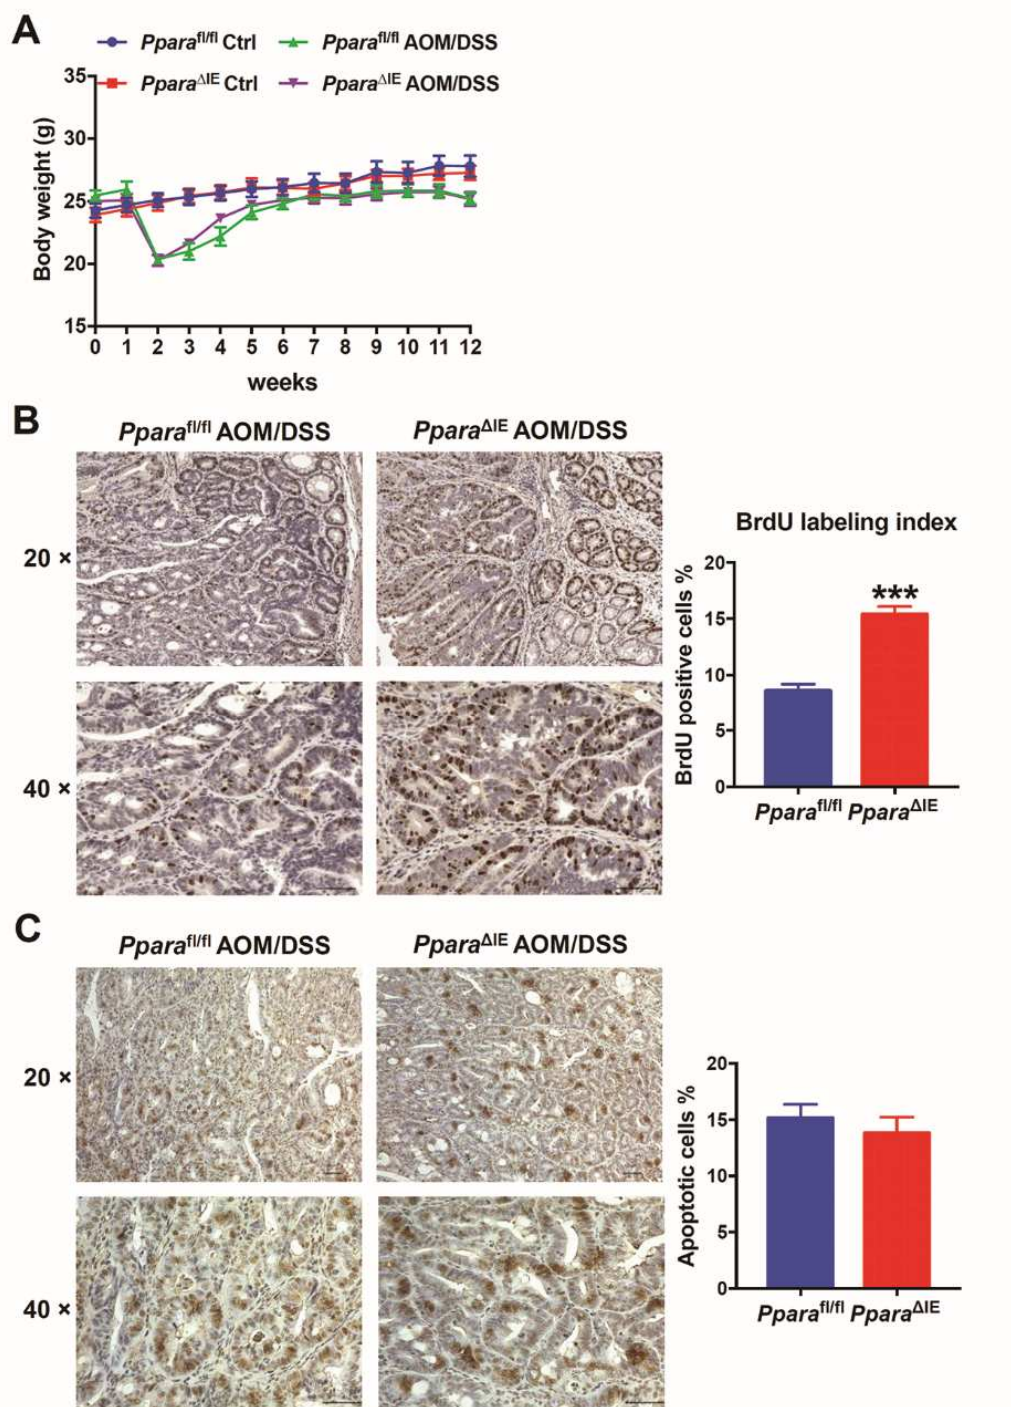

**Figure S2. Intestine-specific knockout of PPAR $\alpha$  increased AOM and DSS-induced colon carcinogenesis.** (A) The body weight curves of four groups of mice: *Ppara*<sup>fl/fl</sup> Ctrl (n=7), *Ppara*<sup>ΔIE</sup> Ctrl (n=6), *Ppara*<sup>fl/fl</sup> AOM/DSS (n=11), *Ppara*<sup>ΔIE</sup> AOM/DSS (n=12). (B) *Left*, Representative BrdU staining of colon sections. Scale bars: 50  $\mu$ m. *Right*, BrdU labeling index. (C) *Left*, Representative TUNEL staining of colon sections. Scale bars: 50  $\mu$ m. *Right*, Percentage of apoptotic cells. \*\*\*  $P < 0.001$ .

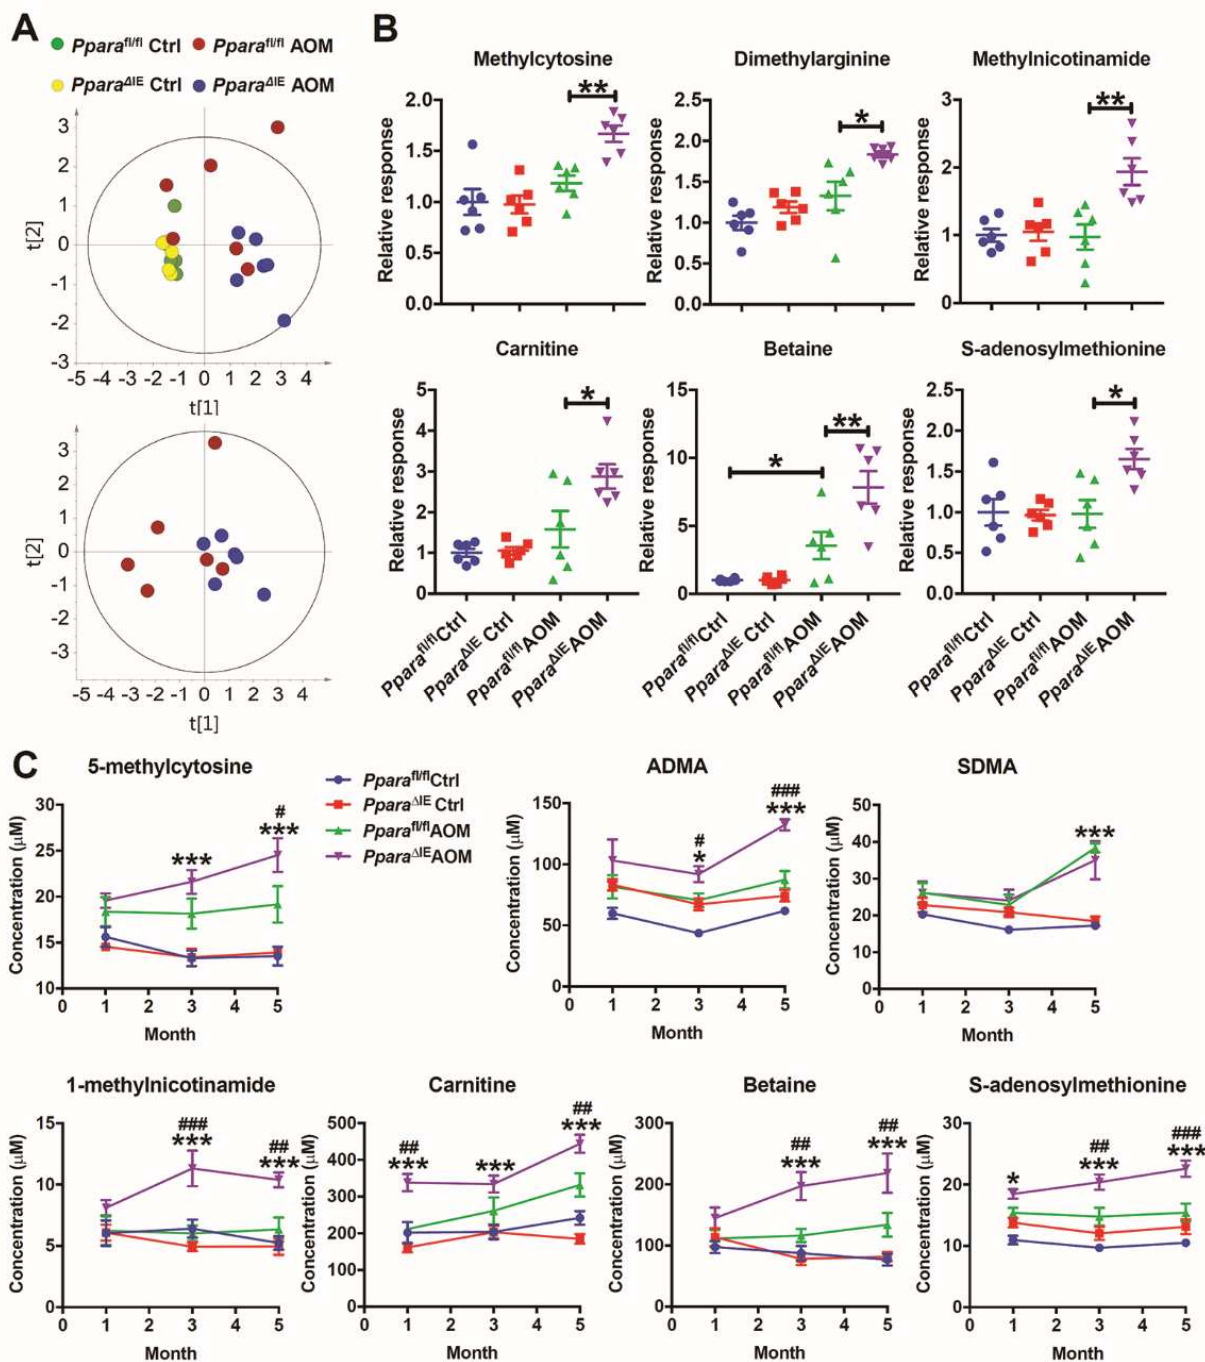

**Figure S3. Several methylation related metabolites were increased in the urine of tumor-bearing *Ppara*<sup>ΔIE</sup> mice.** (A) Score scatter plot for principal components analysis of creatinine-normalized data obtained from hydrophilic interaction liquid chromatography (HILIC)-electrospray ionization (ESI)-mass spectrometry (MS) analysis of urine samples obtained 5 months after the last AOM injection. N=6 mice/group. (B) The relative levels of methylcytosine, dimethylarginine, methylnicotinamide, carnitine, betaine and S-adenosylmethionine in the urine samples obtained 5 months after the last AOM injection. \*  $P < 0.05$ , \*\*  $P < 0.01$ . (C) The longitudinal variations in the creatinine-normalized urinary excretion of 5-methylcytosine, ADMA, SDMA, 1-methylnicotinamide, carnitine, betaine and S-adenosylmethionine. N=6 mice/group. \*  $P < 0.05$ , \*\*\*  $P < 0.001$  relative to *Ppara*<sup>ΔIE</sup> Ctrl group; #  $P < 0.05$ , ##  $P < 0.01$ , ###  $P < 0.001$  relative to *Ppara*<sup>fl/fl</sup> AOM group.

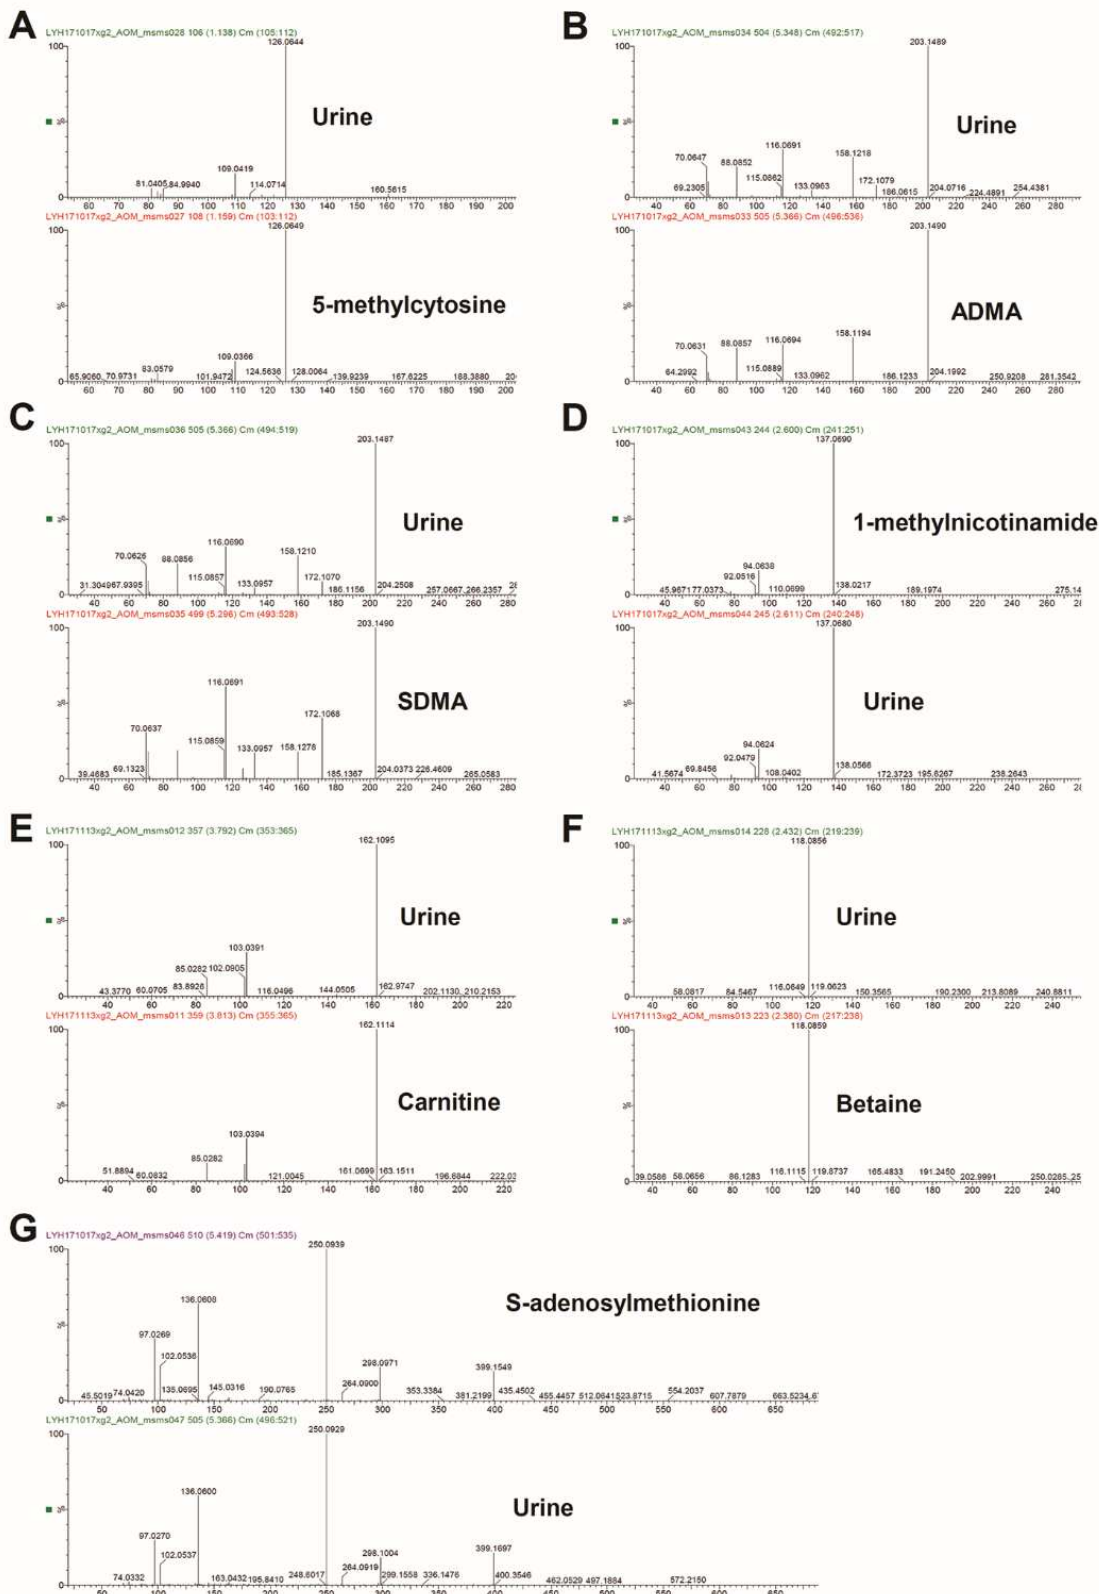

**Figure S4. Validation of metabolites by MS/MS fragmentation reactions.** Comparison of fragmentation patterns between urine sample and authentic standards 5-methylcytosine (A), ADMA (B), SDMA (C), 1-methylnicotinamide (D), carnitine (E), betaine (F) and S-adenosylmethionine (G).

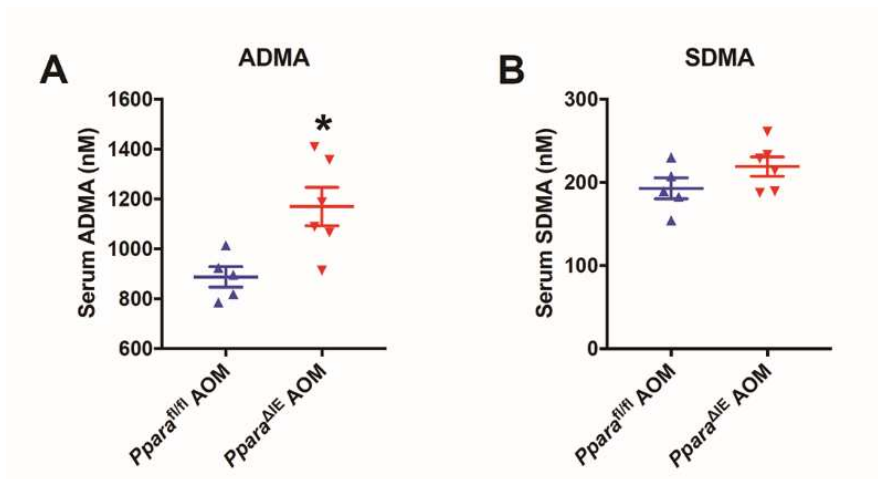

**Figure S5. The levels of ADMA and SDMA in the serum.** The levels of ADMA (A) and SDMA (B) in the serum of AOM-administered *Ppara<sup>fl/fl</sup>* (n=5) and *Ppara<sup>ΔE</sup>* (n=6) mice. \*  $P < 0.05$ .

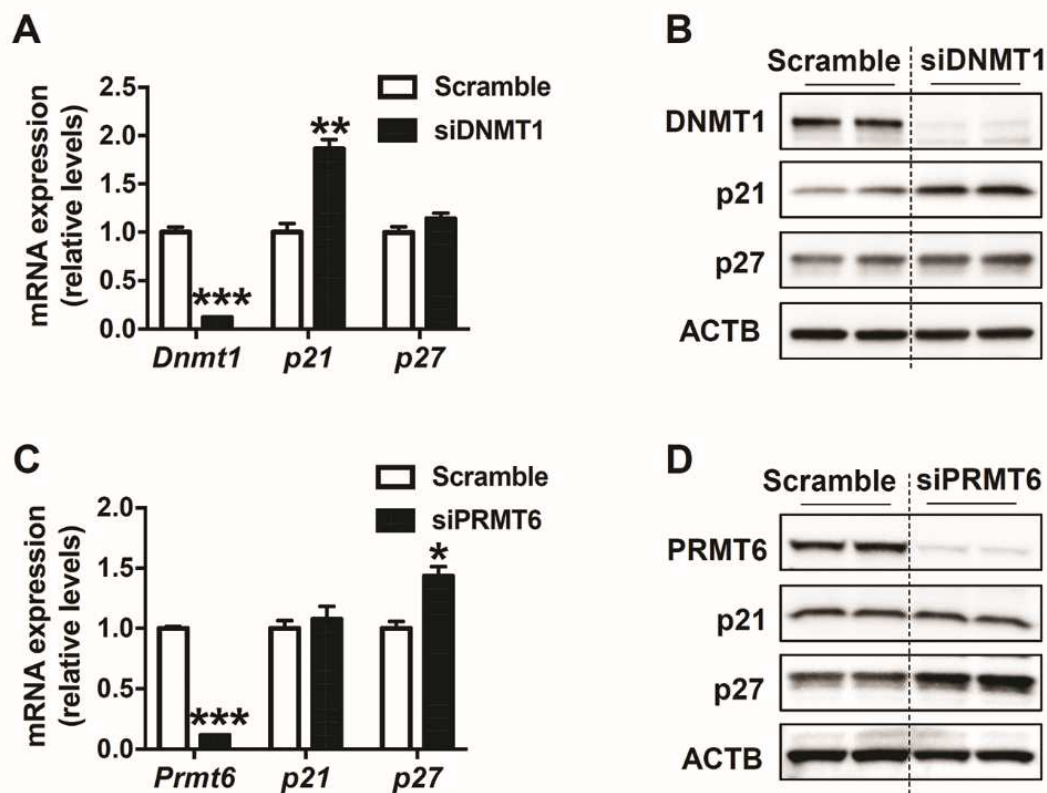

**Figure S6. Silence DNMT1 and PRMT6 increased the expression of p21 and p27, respectively.** (A) The mRNA levels of indicated genes in HCT116 cells transfected with control siRNA or siRNA targeting *Dnmt1* after 48h. N=3/group. (B) Western blot analysis of indicated proteins in HCT116 cells transfected with control siRNA or siRNA targeting *Dnmt1* after 72h. (C) The mRNA levels of indicated genes in HCT116 cells transfected with control siRNA or siRNA targeting *Prmt6* after 48h. N=3/group. (D) Western blot analysis of indicated proteins in HCT116 cells transfected with control siRNA or siRNA targeting *Prmt6* after 72h. \*  $P < 0.05$ , \*\*  $P < 0.01$ , \*\*\*  $P < 0.001$ .

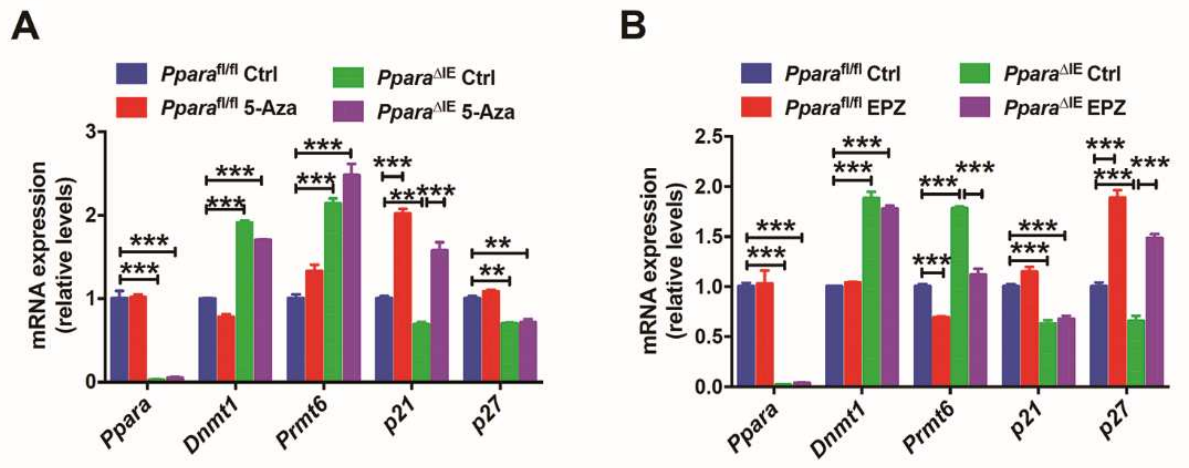

**Figure S7. PPAR $\alpha$  regulated the expression of p21 and p27 partially through DNMT1 and PRMT6 in the intestine.** The mRNA levels of *Ppara*, *Dnmt1*, *Prmt6*, *p21* and *p27* in cultured primary intestinal epithelial cells isolated from *Ppara*<sup>fl/fl</sup> or *Ppara*<sup>ΔIE</sup> mice and treated with 5  $\mu$ M 5-Aza for 72h (A) or 20  $\mu$ M EPZ020411 for 48h (B). \*\*  $P < 0.01$ , \*\*\*  $P < 0.001$ .

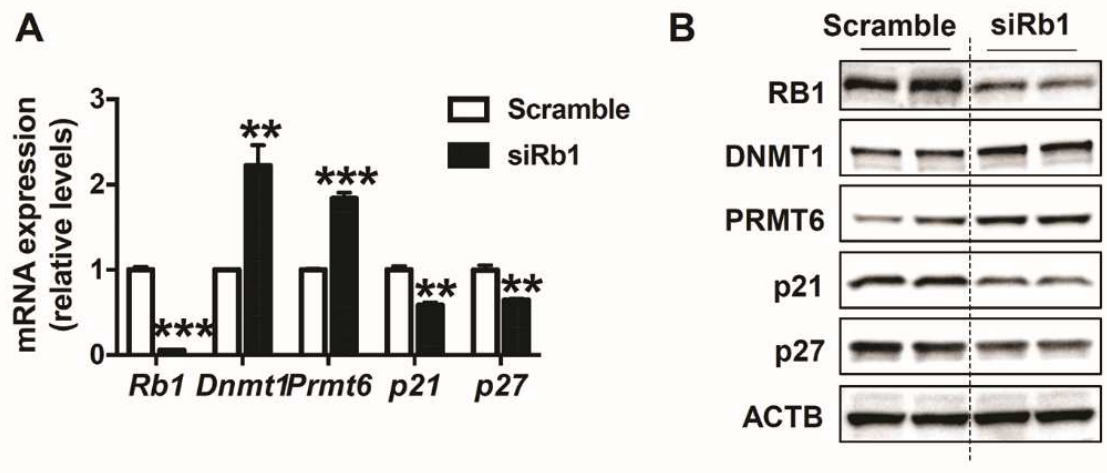

**Figure S8. Silence RB1 increased the expression of DNMT1 and PRMT6.** (A) The mRNA levels of the indicated genes in HCT116 cells transfected with control siRNA or siRNA targeting *Rb1* after 48h. N=3/group. (B) Western blot analysis of the indicated proteins in HCT116 cells transfected with control siRNA or siRNA targeting *Rb1* after 72h. \*\*  $P < 0.01$ , \*\*\*  $P < 0.001$ .

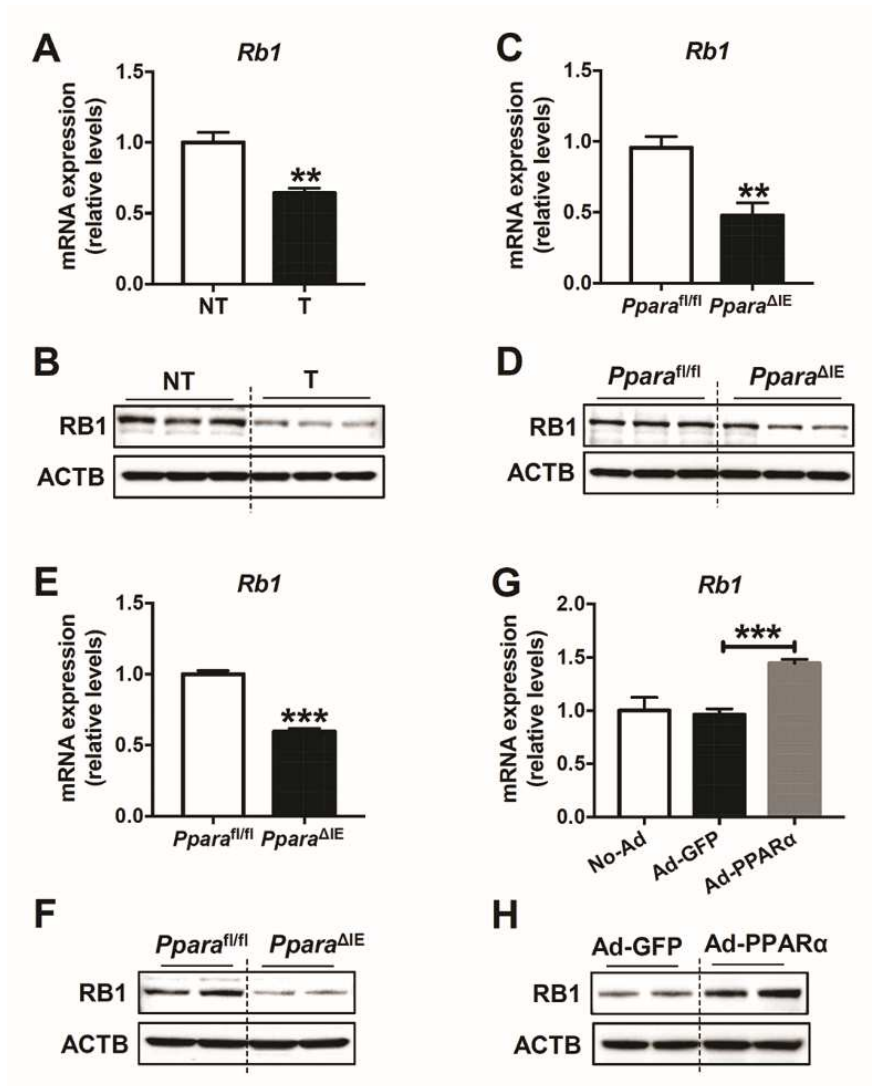

**Figure S9. Intestinal PPAR $\alpha$  regulated the expression of RB1.** (A) The *Rb1* mRNA (n=5/group) and (B) RB1 protein levels mouse colon tumors (T) and adjacent non-tumor tissues (NT). (C) The *Rb1* mRNA (n=5/group) and (D) RB1 protein levels in the colon samples from *Ppara*<sup>fl/fl</sup> and *Ppara*<sup>ΔIE</sup> mice. (E) The *Rb1* mRNA (n=3/group) and (F) RB1 protein levels in primary intestinal epithelial cells isolated from *Ppara*<sup>fl/fl</sup> and *Ppara*<sup>ΔIE</sup> mice. (G) Primary intestinal epithelial cells isolated from wild-type C57BL/6N mice were cultured and infected with control adenovirus (Ad-GFP) or adenovirus overexpression PPAR $\alpha$  (Ad-PPAR $\alpha$ ), or no infection (No-Ad) for 60 h. The *Rb1* mRNA (n=2 for No-Ad group, and n=4 for Ad-GFP group and Ad-PPAR $\alpha$  group) and (H) RB1 protein levels were analyzed. \*\*  $P < 0.01$ , \*\*\*  $P < 0.001$ .



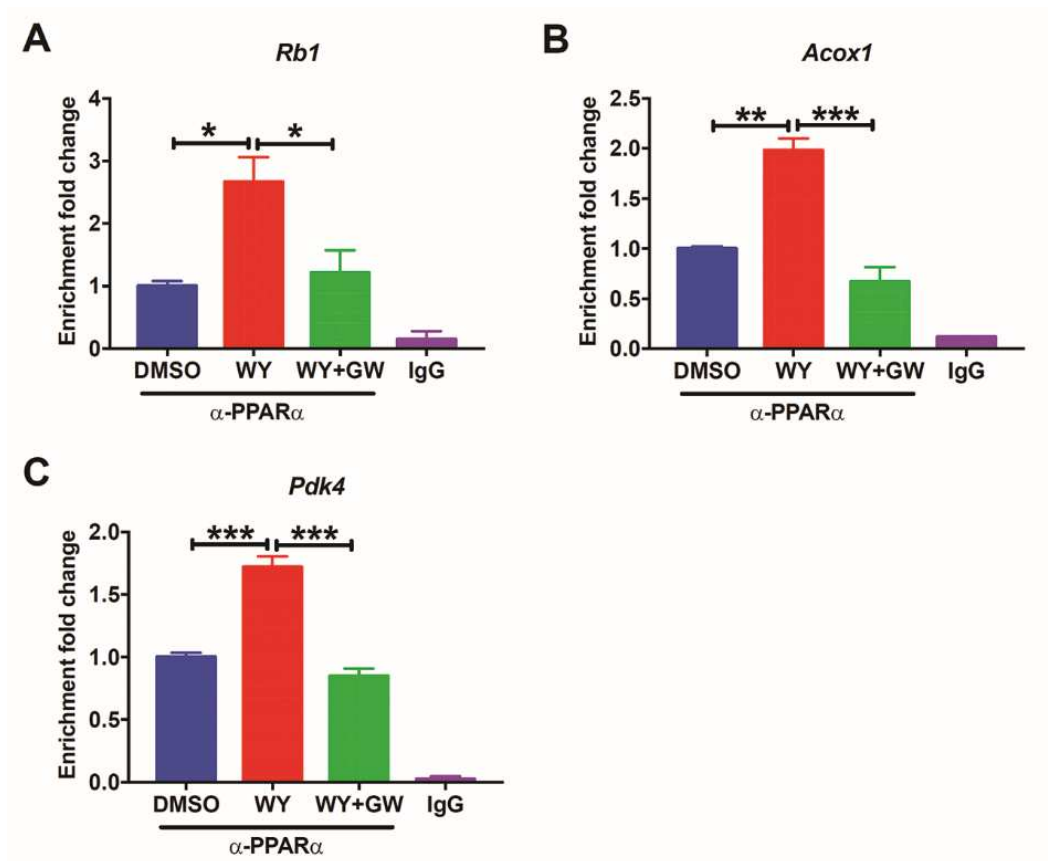

**Figure S10. PPAR $\alpha$  bound to the *Rb1* promoter in HCT116 cells.** ChIP assays on chromatin isolated from HCT116 cells for *Rb1* (A), *Acox1* (B), *Pdk4* (C). N=3/group. \*  $P < 0.05$ , \*\*  $P < 0.01$ , \*\*\*  $P < 0.001$ .

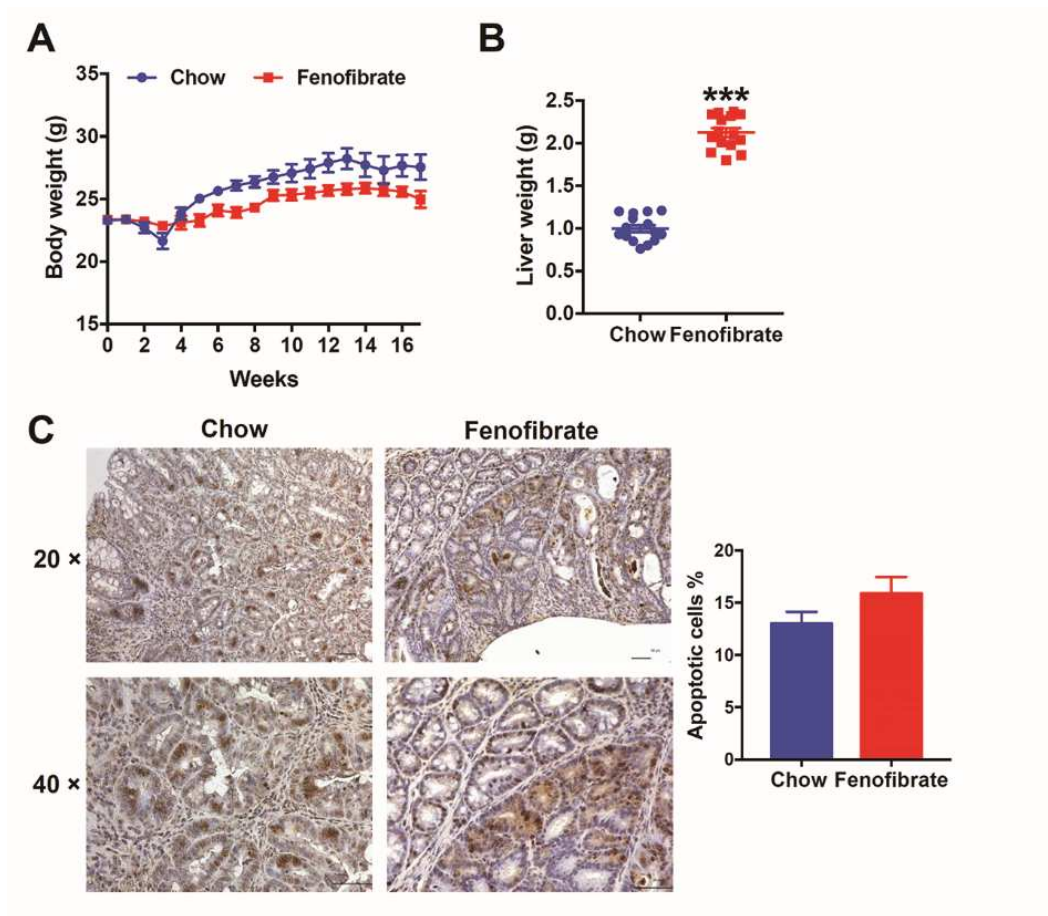

**Figure S11. Fenofibrate decreased AOM and DSS-induced colon carcinogenesis in human *PPARA* transgenic mice.** (A) The body weight curves of AOM and DSS-administered human *PPARA* transgenic mice fed on chow diet or fenofibrate diet (n=15 mice/group). (B) Liver weight. (C) *Left*, Representative TUNEL staining of colon sections. Scale bars: 50  $\mu$ m. *Right*, Percentage of apoptotic cells. \*\*\*  $P < 0.001$ .

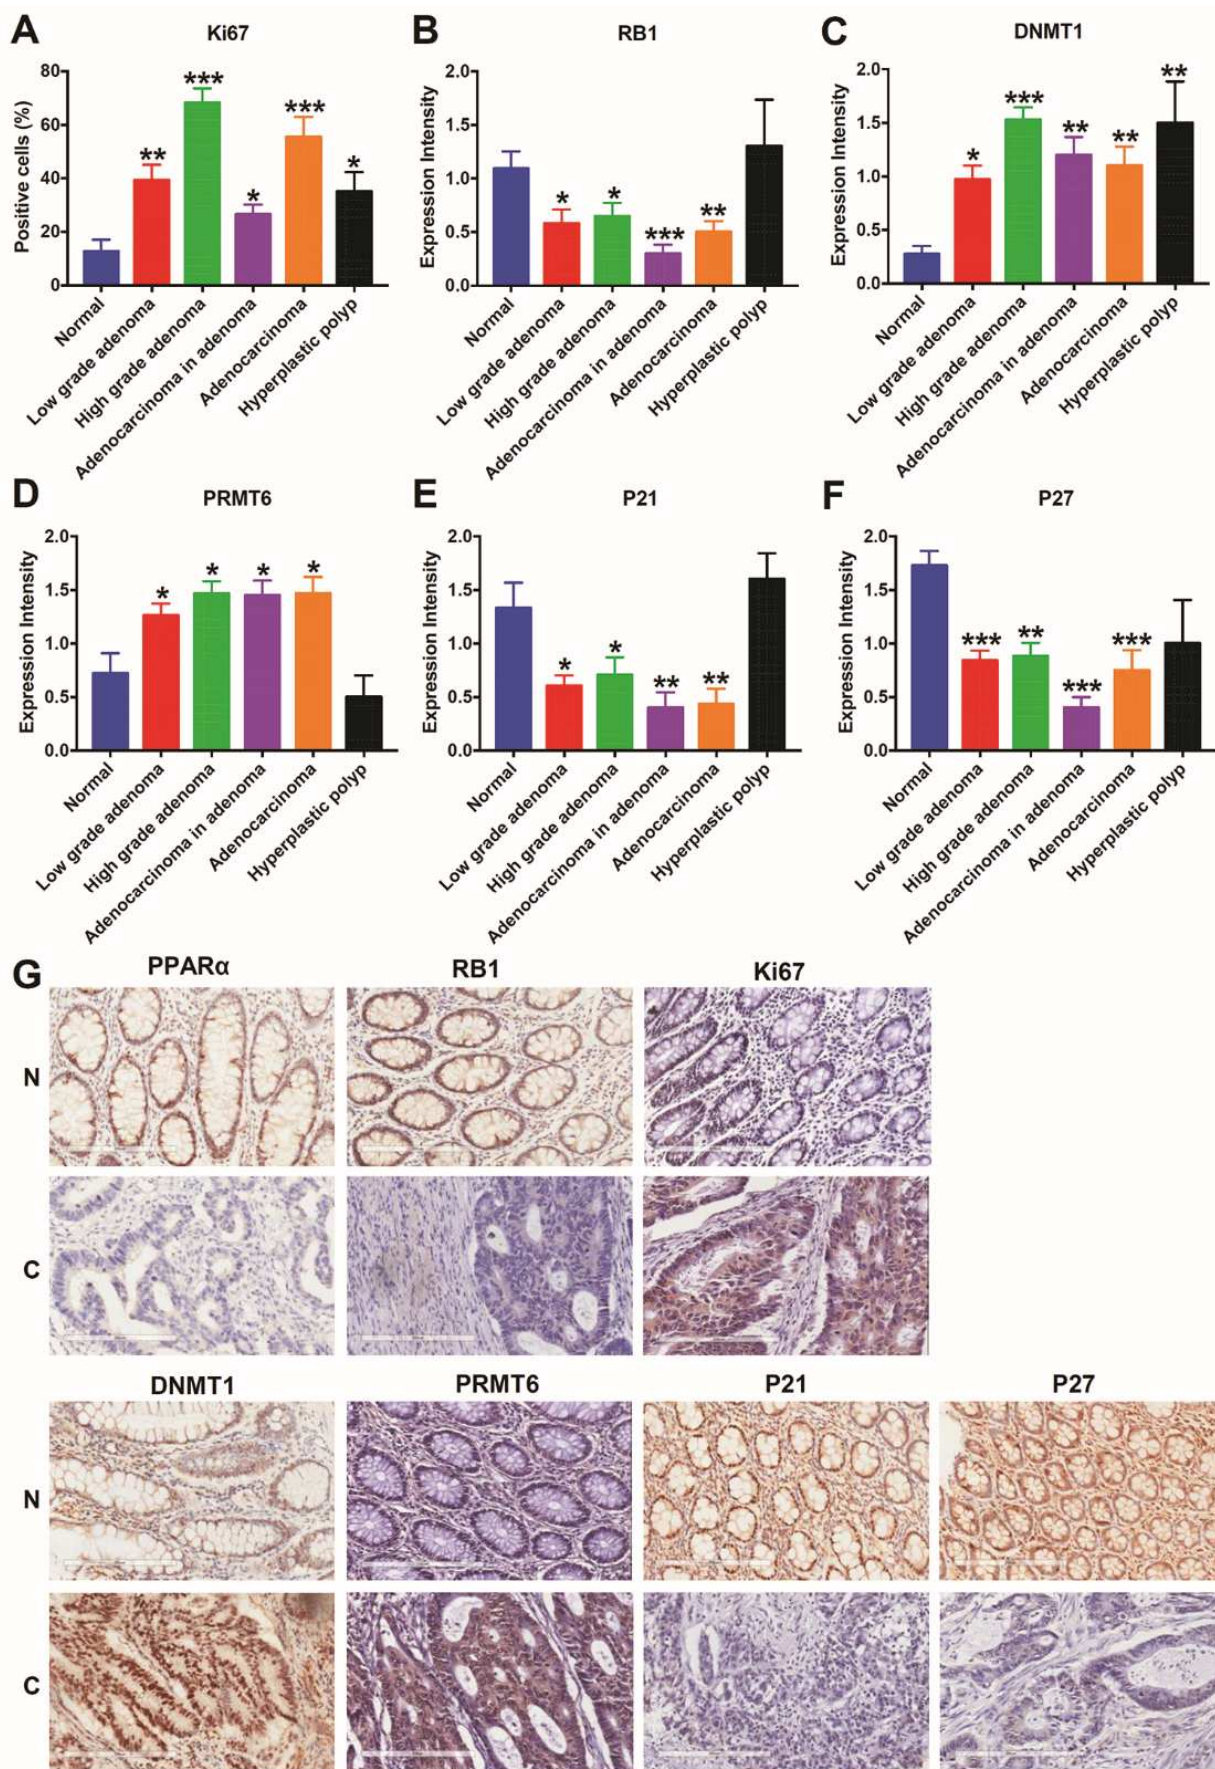

**Figure S12. The expression of PPAR $\alpha$ , RB1, DNMT1, PRMT6, p21, p27 and Ki67 in human colon specimens.** The IHC staining intensity of Ki67 (A), RB1 (B), DNMT1 (C), PRMT6 (D), p21 (E) and p27 (F) in human colon specimens. Normal mucosa, n=9-11; Low grade adenoma, n=19; High grade adenoma, n=16-17; Adenocarcinomas in adenomas, n=10; Adenocarcinomas, n=14-16; Hyperplastic polyp, n=4-5. (G) Representative images of PPAR $\alpha$ , RB1, DNMT1, PRMT6, p21, p27 and Ki67 staining in human normal mucosa and adenocarcinomas. Scale bars: 200  $\mu$ m. \*  $P < 0.05$ , \*\*  $P < 0.01$ , \*\*\*  $P < 0.001$ .

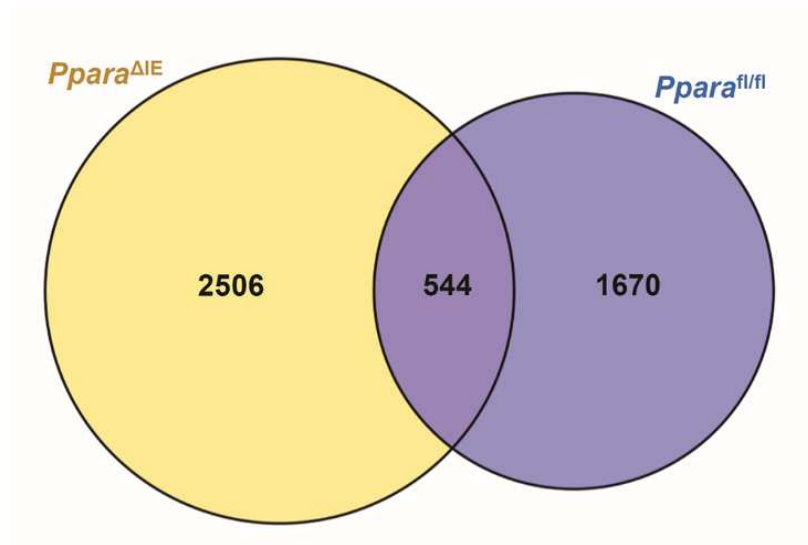

**Figure S13. High or moderate impact somatic mutations in tumors derived from AOM and DSS-administered *Ppara*<sup>fl/fl</sup> and *Ppara*<sup>ΔIE</sup> mice. Diagram of the somatic mutations.**

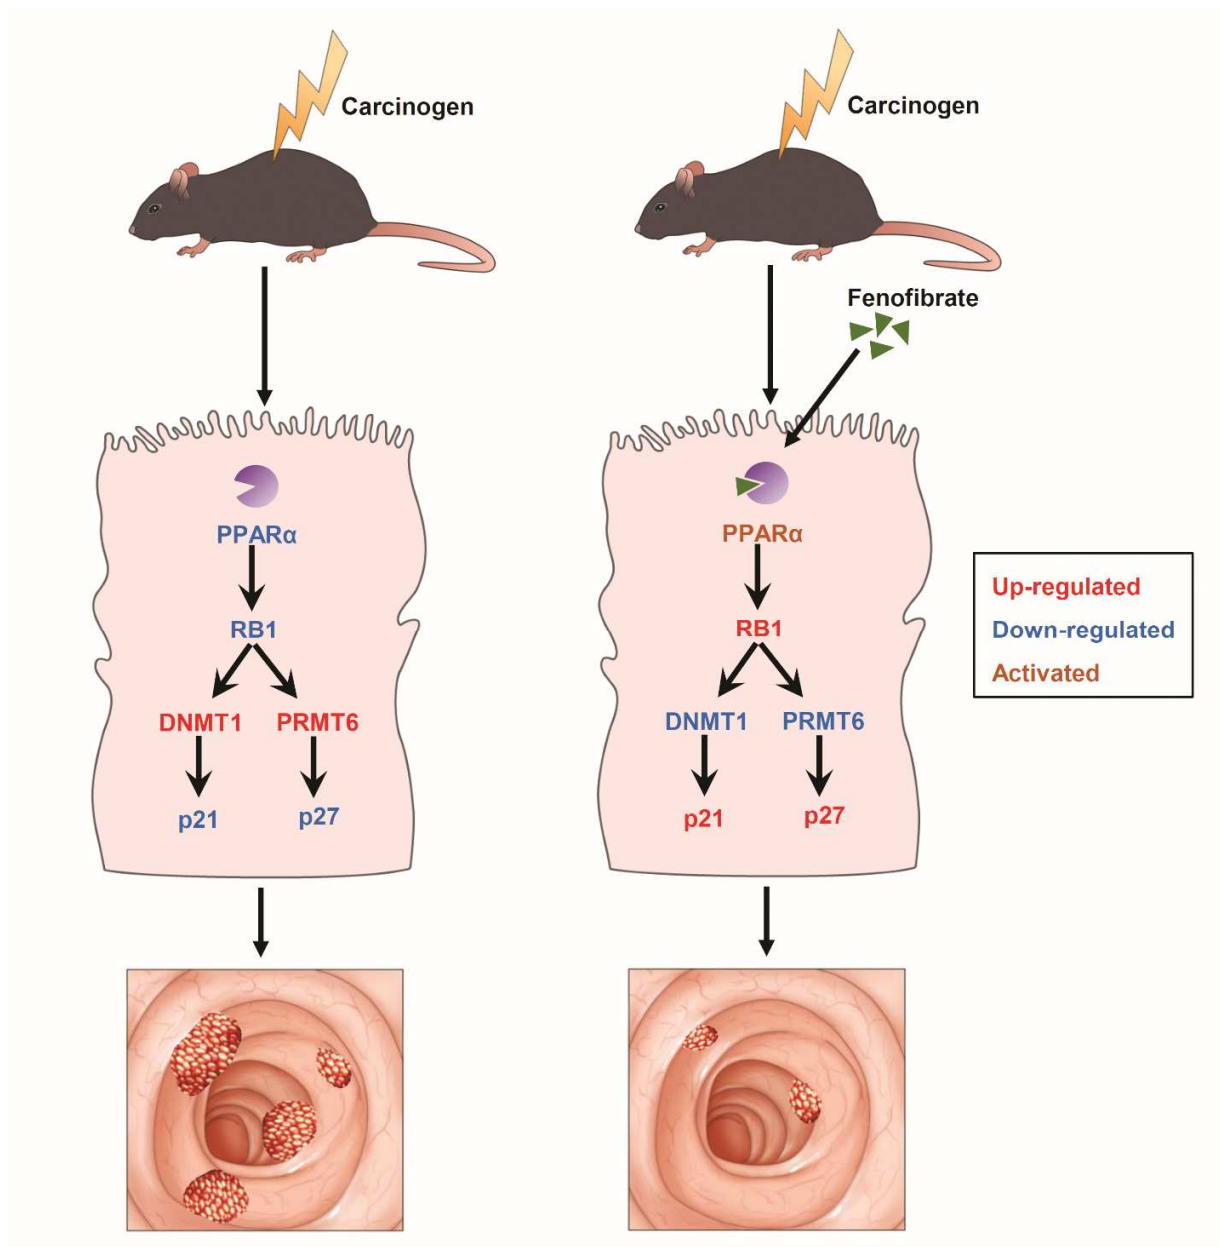

**Figure S14. A schematic model of the mechanism by which intestinal PPAR $\alpha$  protects against colon carcinogenesis.** Upon activation by fenofibrate, intestinal PPAR $\alpha$  down-regulates DNMT1 and PRMT6 by RB1/E2F pathway, which in turn increases the expression of p21 and p27 via release of DNA methylation- and histone H3R2 dimethylation-mediated transcriptional repression, respectively, thus protecting against colon carcinogenesis.
